# Supplementary material for: Plasmalogens largely mediate the protective effect of breastfeeding on infections and chronic inflammation
Source: Research Square preprint supplement (doi:10.21203/rs.3.rs-6544571/v1), 2025-05-21
Supplement: Supplementary file 1 [file efd6f2e42fa891395dd4e729.xlsx]

## Sheet: S1
S1: List of Supplementary Tables
S2: Cohort characteristics (n=899)
S3: Abbreviations for NMR metabolomic measures
S4: List of LC/MS lipidomic lipid species and abbreviations
S5: Spearman correlation (rho) of NMR biomarkers and lipid class totals at 6 months
S6: Spearman correlation (rho) of NMR biomarkers and lipid class totals at 12 months
S7: Association of breastfeeding status at 6m and 6m NMR metabolomics biomarkers
S8: Association of breastfeeding with lipid species at 6 months
S9: Association of breastfeeding with lipid classes at 6 months
S10: Association of breastfeeding status and NMR metabolomics biomarkers at 12m
S11: Association of breastfeeding with lipid species at 12 months
S12: Association of breastfeeding with lipid class at 12 months
S13: Association of GlycA and NMR metabolomics biomarkers at 6m
S14: Association of GlycA with lipid species at 6 months
S15: Associtation of GlycA with lipid classes at 6 months
S16: Association of GlycA with NMR metabolomics biomarkers at 12m
S17: Association of GlycA with lipid species at 12 months
S18: Association of GlycA with lipid class at 12 months
S19: Longitudinal association of NMR metabolomics biomarkers at 6m with GlycA at 12m
S20: Longitudinal association of lipid species at 6m with GlycA at 12m
S21: Longitudinal association of lipid class at 6m with GlycA at 12m
S22: Mediation Analyses: NMR metabolomics biomarkers mediate the effect of breastfeeding on GlycA at 6m
S23: Mediation Analyses: Plasma lipids mediate the effect of breastfeeding on GlycA at 6m
S24: Mediation Analyses: NMR metabolomics biomarkers mediate the effect of breastfeeding on GlycA at 12m
S25: Mediation Analyses: Plasma lipids mediate the effect of breastfeeding on GlycA at 12m
S26: Mediation Analyses: GlycA mediates the effect of breastfeeding on NMR metabolomics biomarkers at 6m
S27: Mediation Analyses: GlycA mediates the effect of breastfeeding on plasma lipids at 6m
S28: Mediation Analyses: GlycA mediates the effect of breastfeeding on NMR metabolomics biomarkers at 12m
S29: Mediation Analyses: GlycA mediates the effect of breastfeeding on plasma lipids at 12m
S30: Mediation Analyses: Comparison of top indirect effects (ranked by p-value) for mediation of the effects of breastfeeding either by lipids/metabolites on GlycA or by GlycA on lipids/metabolites at 6m and 12m
S31: Association of number of infections from birth to 12m and NMR metabolomics biomarkers at 12m
S32: Association of number of infections from birth to 12m with lipid species at 12m
S33: Association of number of infections from birth to 12m with lipid classes at 12m
S34: Mediation Analyses: NMR metabolomics mediate the effect of breastfeeding on number of parent-reported infections up to 12m
S35: Mediation Analyses: Plasma lipids mediate the effect of breastfeeding on number of infections at 12m
S36: Mediation Analyses: Number of parent-reported infections up to 12m mediate the effect of breastfeeding on NMR metabolomics at 12m
S37: Mediation Analyses: Number of parent-reported infections up to 12m mediate the effect of breastfeeding on lipid species at 12m
S38: Mediation Analyses: NMR metabolomics biomarkers mediate the effect of breastfeeding on GlycA at 6m, with additional adjustment for weight at 6m
S39: Mediation Analyses: Plasma lipids mediate the effect of breastfeeding on GlycA at 6m, with additional adjustment for weight at 6m
S40: Mediation Analyses: NMR metabolomics biomarkers mediate the effect of breastfeeding on GlycA at 12m, with additional adjustment for weight at 12m
S41: Mediation Analyses: Plasma lipids mediate the effect of breastfeeding on GlycA at 12m, with additional adjustment for weight at 12m
S42: Mediation Analyses: GlycA mediates the effect of breastfeeding on NMR metabolomics biomarkers at 6m, with additional adjustment for weight at 6m
S43: Mediation Analyses: GlycA mediates the effect of breastfeeding on plasma lipids at 6m, with additional adjustment for weight at 6m
S44: Mediation Analyses: GlycA mediates the effect of breastfeeding on NMR metabolomics biomarkers at 12m, with additional adjustment for weight at 12m
S45: Mediation Analyses: GlycA mediates the effect of breastfeeding on plasma lipids at 12m, with additional adjustment for weight at 12m
Supp Fig 1: Comparison of proportion mediation by metabolomic biomarkers/lipids vs proportion mediation by GlycA.
Supp Fig 2: Flowchart of Barwon Infant Study participants included this study at the 6-month and 12-month timepoints.

## Sheet: S2
S2: Cohort characteristics (n=899)
Characteristic	n	Distribution1
Mother
Age at conception (years)	889	31.8 (4.5)
Smoking during pregnancy (any)	880	118 [13%]
Pre-pregnancy BMI (kg/m2)	771	25.4 (5.4)
Education status (completed university level)	886	478 [54%]
Area-level socioeconomic position2	887	1,019 (77)
Child
Sex (male)	889	457 [51%]
Ethnicity (ethnic minority)3	849	35 [4.1%]
Birth time point
Gestational age (weeks)	889	276 (11)
Birth weight (kg)	889	3.55 (0.52)
Birth weight z-score4	889	0.36 (0.94)
6-month time point
Age (months)	785	6.5 (0.6)
Breastfeeding status (any)	793	487 [61%]
GlycA (mmol/L)	793	0.78 (0.13)
Total parent-reported infections since birth	577	2.0 (1.8)
12-month time point
Age (months)	728	13.0 (0.8)
Breastfeeding status (any)	734	284 [39%]
GlycA (mmol/L)	734	1.32 (0.22)
Total parent-reported infections since birth	549	5.6 (3.3)
1Continous various presented as mean (standard deviation); dichotomous variables presented as number [percentage of total]
2Index of Relative Socio-economic Disadvantage (IRSD) at the Statistical Area 1 level
3Dichotomised as “Anglo/European” or “ethnic minority” based on parental country of birth due to small numbers in the original country groupings
4Gestational age- and sex-standardized birth weight z-scores based on UK-WHO growth charts

## Sheet: S3
S3: Abbreviations for NMR metabolomic measures
Abbreviation	Description
Total_C	Total cholesterol
non_HDL_C	Total cholesterol minus HDL-C
Remnant_C	Remnant cholesterol (non-HDL, non-LDL -cholesterol)
VLDL_C	VLDL cholesterol
Clinical_LDL_C	Clinical LDL cholesterol
LDL_C	LDL cholesterol
HDL_C	HDL cholesterol
HDL2_C	HDL2 cholesterol
HDL3_C	HDL3 cholesterol
Total_TG	Total triglycerides
VLDL_TG	Triglycerides in VLDL
LDL_TG	Triglycerides in LDL
HDL_TG	Triglycerides in HDL
Total_PL	Total phospholipids in lipoprotein particles
VLDL_PL	Phospholipids in VLDL
LDL_PL	Phospholipids in LDL
HDL_PL	Phospholipids in HDL
Total_CE	Total esterified cholesterol
VLDL_CE	Cholesteryl esters in VLDL
LDL_CE	Cholesteryl esters in LDL
HDL_CE	Cholesteryl esters in HDL
Total_FC	Total free cholesterol
VLDL_FC	Free cholesterol in VLDL
LDL_FC	Free cholesterol in LDL
HDL_FC	Free cholesterol in HDL
Total_L	Total lipids in lipoprotein particles
VLDL_L	Total lipids in VLDL
LDL_L	Total lipids in LDL
HDL_L	Total lipids in HDL
Total_P	Total concentration of lipoprotein particles
VLDL_P	Concentration of VLDL particles
LDL_P	Concentration of LDL particles
HDL_P	Concentration of HDL particles
VLDL_size	Average diameter for VLDL particles
LDL_size	Average diameter for LDL particles
HDL_size	Average diameter for HDL particles
Phosphoglyc	Phosphoglycerides
TG_by_PG	Ratio of triglycerides to phosphoglycerides
Cholines	Total cholines
Phosphatidylc	Phosphatidylcholines
Sphingomyelins	Sphingomyelins
ApoB	Apolipoprotein B
ApoA1	Apolipoprotein A1
ApoB_by_ApoA1	Ratio of apolipoprotein B to apolipoprotein A1
Total_FA	Total fatty acids
Unsaturation	Degree of unsaturation
Omega_3	Omega-3 fatty acids
Omega_6	Omega-6 fatty acids
PUFA	Polyunsaturated fatty acids
MUFA	Monounsaturated fatty acids
SFA	Saturated fatty acids
LA	Linoleic acid
DHA	Docosahexaenoic acid
Omega_3_pct	Ratio of omega-3 fatty acids to total fatty acids
Omega_6_pct	Ratio of omega-6 fatty acids to total fatty acids
PUFA_pct	Ratio of polyunsaturated fatty acids to total fatty acids
MUFA_pct	Ratio of monounsaturated fatty acids to total fatty acids
SFA_pct	Ratio of saturated fatty acids to total fatty acids
LA_pct	Ratio of linoleic acid to total fatty acids
DHA_pct	Ratio of docosahexaenoic acid to total fatty acids
PUFA_by_MUFA	Ratio of polyunsaturated fatty acids to monounsaturated fatty acids
Omega_6_by_Omega_3	Ratio of omega-6 fatty acids to omega-3 fatty acids
Ala	Alanine
Gln	Glutamine
Gly	Glycine
His	Histidine
Total_BCAA	Total concentration of branched-chain amino acids (leucine + isoleucine + valine)
Ile	Isoleucine
Leu	Leucine
Val	Valine
Phe	Phenylalanine
Tyr	Tyrosine
Glucose	Glucose
Lactate	Lactate
Pyruvate	Pyruvate
Citrate	Citrate
Glycerol	Glycerol
bOHbutyrate	3-Hydroxybutyrate
Acetate	Acetate
Acetoacetate	Acetoacetate
Acetone	Acetone
Creatinine	Creatinine
Albumin	Albumin
GlycA	Glycoprotein acetyls
XXL_VLDL_P	Concentration of chylomicrons and extremely large VLDL particles
XXL_VLDL_L	Total lipids in chylomicrons and extremely large VLDL
XXL_VLDL_PL	Phospholipids in chylomicrons and extremely large VLDL
XXL_VLDL_C	Cholesterol in chylomicrons and extremely large VLDL
XXL_VLDL_CE	Cholesteryl esters in chylomicrons and extremely large VLDL
XXL_VLDL_FC	Free cholesterol in chylomicrons and extremely large VLDL
XXL_VLDL_TG	Triglycerides in chylomicrons and extremely large VLDL
XL_VLDL_P	Concentration of very large VLDL particles
XL_VLDL_L	Total lipids in very large VLDL
XL_VLDL_PL	Phospholipids in very large VLDL
XL_VLDL_C	Cholesterol in very large VLDL
XL_VLDL_CE	Cholesteryl esters in very large VLDL
XL_VLDL_FC	Free cholesterol in very large VLDL
XL_VLDL_TG	Triglycerides in very large VLDL
L_VLDL_P	Concentration of large VLDL particles
L_VLDL_L	Total lipids in large VLDL
L_VLDL_PL	Phospholipids in large VLDL
L_VLDL_C	Cholesterol in large VLDL
L_VLDL_CE	Cholesteryl esters in large VLDL
L_VLDL_FC	Free cholesterol in large VLDL
L_VLDL_TG	Triglycerides in large VLDL
M_VLDL_P	Concentration of medium VLDL particles
M_VLDL_L	Total lipids in medium VLDL
M_VLDL_PL	Phospholipids in medium VLDL
M_VLDL_C	Cholesterol in medium VLDL
M_VLDL_CE	Cholesteryl esters in medium VLDL
M_VLDL_FC	Free cholesterol in medium VLDL
M_VLDL_TG	Triglycerides in medium VLDL
S_VLDL_P	Concentration of small VLDL particles
S_VLDL_L	Total lipids in small VLDL
S_VLDL_PL	Phospholipids in small VLDL
S_VLDL_C	Cholesterol in small VLDL
S_VLDL_CE	Cholesteryl esters in small VLDL
S_VLDL_FC	Free cholesterol in small VLDL
S_VLDL_TG	Triglycerides in small VLDL
XS_VLDL_P	Concentration of very small VLDL particles
XS_VLDL_L	Total lipids in very small VLDL
XS_VLDL_PL	Phospholipids in very small VLDL
XS_VLDL_C	Cholesterol in very small VLDL
XS_VLDL_CE	Cholesteryl esters in very small VLDL
XS_VLDL_FC	Free cholesterol in very small VLDL
XS_VLDL_TG	Triglycerides in very small VLDL
IDL_P	Concentration of IDL particles
IDL_L	Total lipids in IDL
IDL_PL	Phospholipids in IDL
IDL_C	Cholesterol in IDL
IDL_CE	Cholesteryl esters in IDL
IDL_FC	Free cholesterol in IDL
IDL_TG	Triglycerides in IDL
L_LDL_P	Concentration of large LDL particles
L_LDL_L	Total lipids in large LDL
L_LDL_PL	Phospholipids in large LDL
L_LDL_C	Cholesterol in large LDL
L_LDL_CE	Cholesteryl esters in large LDL
L_LDL_FC	Free cholesterol in large LDL
L_LDL_TG	Triglycerides in large LDL
M_LDL_P	Concentration of medium LDL particles
M_LDL_L	Total lipids in medium LDL
M_LDL_PL	Phospholipids in medium LDL
M_LDL_C	Cholesterol in medium LDL
M_LDL_CE	Cholesteryl esters in medium LDL
M_LDL_FC	Free cholesterol in medium LDL
M_LDL_TG	Triglycerides in medium LDL
S_LDL_P	Concentration of small LDL particles
S_LDL_L	Total lipids in small LDL
S_LDL_PL	Phospholipids in small LDL
S_LDL_C	Cholesterol in small LDL
S_LDL_CE	Cholesteryl esters in small LDL
S_LDL_FC	Free cholesterol in small LDL
S_LDL_TG	Triglycerides in small LDL
XL_HDL_P	Concentration of very large HDL particles
XL_HDL_L	Total lipids in very large HDL
XL_HDL_PL	Phospholipids in very large HDL
XL_HDL_C	Cholesterol in very large HDL
XL_HDL_CE	Cholesteryl esters in very large HDL
XL_HDL_FC	Free cholesterol in very large HDL
XL_HDL_TG	Triglycerides in very large HDL
L_HDL_P	Concentration of large HDL particles
L_HDL_L	Total lipids in large HDL
L_HDL_PL	Phospholipids in large HDL
L_HDL_C	Cholesterol in large HDL
L_HDL_CE	Cholesteryl esters in large HDL
L_HDL_FC	Free cholesterol in large HDL
L_HDL_TG	Triglycerides in large HDL
M_HDL_P	Concentration of medium HDL particles
M_HDL_L	Total lipids in medium HDL
M_HDL_PL	Phospholipids in medium HDL
M_HDL_C	Cholesterol in medium HDL
M_HDL_CE	Cholesteryl esters in medium HDL
M_HDL_FC	Free cholesterol in medium HDL
M_HDL_TG	Triglycerides in medium HDL
S_HDL_P	Concentration of small HDL particles
S_HDL_L	Total lipids in small HDL
S_HDL_PL	Phospholipids in small HDL
S_HDL_C	Cholesterol in small HDL
S_HDL_CE	Cholesteryl esters in small HDL
S_HDL_FC	Free cholesterol in small HDL
S_HDL_TG	Triglycerides in small HDL
XXL_VLDL_PL_pct	Phospholipids to total lipids ratio in chylomicrons and extremely large VLDL
XXL_VLDL_C_pct	Cholesterol to total lipids ratio in chylomicrons and extremely large VLDL
XXL_VLDL_CE_pct	Cholesteryl esters to total lipids ratio in chylomicrons and extremely large VLDL
XXL_VLDL_FC_pct	Free cholesterol to total lipids ratio in chylomicrons and extremely large VLDL
XXL_VLDL_TG_pct	Triglycerides to total lipids ratio in chylomicrons and extremely large VLDL
XL_VLDL_PL_pct	Phospholipids to total lipids ratio in very large VLDL
XL_VLDL_C_pct	Cholesterol to total lipids ratio in very large VLDL
XL_VLDL_CE_pct	Cholesteryl esters to total lipids ratio in very large VLDL
XL_VLDL_FC_pct	Free cholesterol to total lipids ratio in very large VLDL
XL_VLDL_TG_pct	Triglycerides to total lipids ratio in very large VLDL
L_VLDL_PL_pct	Phospholipids to total lipids ratio in large VLDL
L_VLDL_C_pct	Cholesterol to total lipids ratio in large VLDL
L_VLDL_CE_pct	Cholesteryl esters to total lipids ratio in large VLDL
L_VLDL_FC_pct	Free cholesterol to total lipids ratio in large VLDL
L_VLDL_TG_pct	Triglycerides to total lipids ratio in large VLDL
M_VLDL_PL_pct	Phospholipids to total lipids ratio in medium VLDL
M_VLDL_C_pct	Cholesterol to total lipids ratio in medium VLDL
M_VLDL_CE_pct	Cholesteryl esters to total lipids ratio in medium VLDL
M_VLDL_FC_pct	Free cholesterol to total lipids ratio in medium VLDL
M_VLDL_TG_pct	Triglycerides to total lipids ratio in medium VLDL
S_VLDL_PL_pct	Phospholipids to total lipids ratio in small VLDL
S_VLDL_C_pct	Cholesterol to total lipids ratio in small VLDL
S_VLDL_CE_pct	Cholesteryl esters to total lipids ratio in small VLDL
S_VLDL_FC_pct	Free cholesterol to total lipids ratio in small VLDL
S_VLDL_TG_pct	Triglycerides to total lipids ratio in small VLDL
XS_VLDL_PL_pct	Phospholipids to total lipids ratio in very small VLDL
XS_VLDL_C_pct	Cholesterol to total lipids ratio in very small VLDL
XS_VLDL_CE_pct	Cholesteryl esters to total lipids ratio in very small VLDL
XS_VLDL_FC_pct	Free cholesterol to total lipids ratio in very small VLDL
XS_VLDL_TG_pct	Triglycerides to total lipids ratio in very small VLDL
IDL_PL_pct	Phospholipids to total lipids ratio in IDL
IDL_C_pct	Cholesterol to total lipids ratio in IDL
IDL_CE_pct	Cholesteryl esters to total lipids ratio in IDL
IDL_FC_pct	Free cholesterol to total lipids ratio in IDL
IDL_TG_pct	Triglycerides to total lipids ratio in IDL
L_LDL_PL_pct	Phospholipids to total lipids ratio in large LDL
L_LDL_C_pct	Cholesterol to total lipids ratio in large LDL
L_LDL_CE_pct	Cholesteryl esters to total lipids ratio in large LDL
L_LDL_FC_pct	Free cholesterol to total lipids ratio in large LDL
L_LDL_TG_pct	Triglycerides to total lipids ratio in large LDL
M_LDL_PL_pct	Phospholipids to total lipids ratio in medium LDL
M_LDL_C_pct	Cholesterol to total lipids ratio in medium LDL
M_LDL_CE_pct	Cholesteryl esters to total lipids ratio in medium LDL
M_LDL_FC_pct	Free cholesterol to total lipids ratio in medium LDL
M_LDL_TG_pct	Triglycerides to total lipids ratio in medium LDL
S_LDL_PL_pct	Phospholipids to total lipids ratio in small LDL
S_LDL_C_pct	Cholesterol to total lipids ratio in small LDL
S_LDL_CE_pct	Cholesteryl esters to total lipids ratio in small LDL
S_LDL_FC_pct	Free cholesterol to total lipids ratio in small LDL
S_LDL_TG_pct	Triglycerides to total lipids ratio in small LDL
XL_HDL_PL_pct	Phospholipids to total lipids ratio in very large HDL
XL_HDL_C_pct	Cholesterol to total lipids ratio in very large HDL
XL_HDL_CE_pct	Cholesteryl esters to total lipids ratio in very large HDL
XL_HDL_FC_pct	Free cholesterol to total lipids ratio in very large HDL
XL_HDL_TG_pct	Triglycerides to total lipids ratio in very large HDL
L_HDL_PL_pct	Phospholipids to total lipids ratio in large HDL
L_HDL_C_pct	Cholesterol to total lipids ratio in large HDL
L_HDL_CE_pct	Cholesteryl esters to total lipids ratio in large HDL
L_HDL_FC_pct	Free cholesterol to total lipids ratio in large HDL
L_HDL_TG_pct	Triglycerides to total lipids ratio in large HDL
M_HDL_PL_pct	Phospholipids to total lipids ratio in medium HDL
M_HDL_C_pct	Cholesterol to total lipids ratio in medium HDL
M_HDL_CE_pct	Cholesteryl esters to total lipids ratio in medium HDL
M_HDL_FC_pct	Free cholesterol to total lipids ratio in medium HDL
M_HDL_TG_pct	Triglycerides to total lipids ratio in medium HDL
S_HDL_PL_pct	Phospholipids to total lipids ratio in small HDL
S_HDL_C_pct	Cholesterol to total lipids ratio in small HDL
S_HDL_CE_pct	Cholesteryl esters to total lipids ratio in small HDL
S_HDL_FC_pct	Free cholesterol to total lipids ratio in small HDL
S_HDL_TG_pct	Triglycerides to total lipids ratio in small HDL

## Sheet: S4
S4: List of LC/MS lipidomic lipid species and abbreviations
Lipid species	Lipid Class Abbreviation	Lipid Class Description
Sph(d16:1)	Sph	Sphingosines
Sph(d18:1)	Sph	Sphingosines
Sph(d18:2)	Sph	Sphingosines
S1P(d16:1)	S1P	Sphingosine phosphates
S1P(d18:0)	S1P	Sphingosine phosphates
S1P(d18:1)	S1P	Sphingosine phosphates
S1P(d18:2)	S1P	Sphingosine phosphates
Cer(d18:0/16:0)	Cer	Ceramides
Cer(d18:0/18:0)	Cer	Ceramides
Cer(d18:0/20:0)	Cer	Ceramides
Cer(d18:0/22:0)	Cer	Ceramides
Cer(d18:0/24:0)	Cer	Ceramides
Cer(d18:0/24:1)	Cer	Ceramides
Cer(d16:1/16:0)	Cer	Ceramides
Cer(d16:1/18:0)	Cer	Ceramides
Cer(d16:1/20:0)	Cer	Ceramides
Cer(d16:1/22:0)	Cer	Ceramides
Cer(d16:1/23:0)	Cer	Ceramides
Cer(d16:1/24:0)	Cer	Ceramides
Cer(d16:1/24:1)	Cer	Ceramides
Cer(d17:1/16:0)	Cer	Ceramides
Cer(d17:1/18:0)	Cer	Ceramides
Cer(d17:1/20:0)	Cer	Ceramides
Cer(d17:1/22:0)	Cer	Ceramides
Cer(d17:1/23:0)	Cer	Ceramides
Cer(d17:1/24:0)	Cer	Ceramides
Cer(d17:1/24:1)	Cer	Ceramides
Cer(d18:1/14:0)	Cer	Ceramides
Cer(d18:1/16:0)	Cer	Ceramides
Cer(d18:1/17:0)	Cer	Ceramides
Cer(d18:1/18:0)	Cer	Ceramides
Cer(d18:1/19:0)	Cer	Ceramides
Cer(d18:1/20:0)	Cer	Ceramides
Cer(d18:1/21:0)	Cer	Ceramides
Cer(d18:1/22:0)	Cer	Ceramides
Cer(d18:1/23:0)	Cer	Ceramides
Cer(d18:1/24:0)	Cer	Ceramides
Cer(d18:1/24:1)	Cer	Ceramides
Cer(d18:1/26:0)	Cer	Ceramides
Cer(d18:2/14:0)	Cer	Ceramides
Cer(d18:2/16:0)	Cer	Ceramides
Cer(d18:2/17:0)	Cer	Ceramides
Cer(d18:2/18:0)	Cer	Ceramides
Cer(d18:2/20:0)	Cer	Ceramides
Cer(d18:2/21:0)	Cer	Ceramides
Cer(d18:2/22:0)	Cer	Ceramides
Cer(d18:2/23:0)	Cer	Ceramides
Cer(d18:2/24:0)	Cer	Ceramides
Cer(d18:2/24:1)	Cer	Ceramides
Cer(d18:2/26:0)	Cer	Ceramides
Cer(d19:1/16:0)	Cer	Ceramides
Cer(d19:1/18:0)	Cer	Ceramides
Cer(d19:1/20:0)	Cer	Ceramides
Cer(d19:1/22:0)	Cer	Ceramides
Cer(d19:1/23:0)	Cer	Ceramides
Cer(d19:1/24:0)	Cer	Ceramides
Cer(d19:1/24:1)	Cer	Ceramides
Cer(d19:1/26:0)	Cer	Ceramides
Cer(d20:1/22:0)	Cer	Ceramides
Cer(d20:1/23:0)	Cer	Ceramides
Cer(d20:1/24:0)	Cer	Ceramides
Cer(d20:1/24:1)	Cer	Ceramides
Cer(d20:1/26:0)	Cer	Ceramides
Cer(m18:0/20:0)	Cer	Ceramides
Cer(m18:0/22:0)	Cer	Ceramides
Cer(m18:0/23:0)	Cer	Ceramides
Cer(m18:0/24:0)	Cer	Ceramides
Cer(m18:0/24:1)	Cer	Ceramides
Cer(m18:1/18:0)	Cer	Ceramides
Cer(m18:1/20:0)	Cer	Ceramides
Cer(m18:1/22:0)	Cer	Ceramides
Cer(m18:1/23:0)	Cer	Ceramides
Cer(m18:1/24:0)	Cer	Ceramides
Cer(m18:1/24:1)	Cer	Ceramides
Cer1P(d18:1/16:0)	C1P	Ceramide-1-phosphate
HexCer(d16:1/18:0)	MHC	Hexosyl-ceramides
HexCer(d16:1/20:0)	MHC	Hexosyl-ceramides
HexCer(d16:1/22:0)	MHC	Hexosyl-ceramides
HexCer(d16:1/24:0)	MHC	Hexosyl-ceramides
HexCer(d18:1/16:0)	MHC	Hexosyl-ceramides
HexCer(d18:1/18:0)	MHC	Hexosyl-ceramides
HexCer(d18:1/20:0)	MHC	Hexosyl-ceramides
HexCer(d18:1/22:0)	MHC	Hexosyl-ceramides
HexCer(d18:1/24:0)	MHC	Hexosyl-ceramides
HexCer(d18:1/24:1)	MHC	Hexosyl-ceramides
HexCer(d18:2/18:0)	MHC	Hexosyl-ceramides
HexCer(d18:2/20:0)	MHC	Hexosyl-ceramides
HexCer(d18:2/22:0)	MHC	Hexosyl-ceramides
HexCer(d18:2/24:0)	MHC	Hexosyl-ceramides
Hex2Cer(d16:1/16:0)	DHC	Di-hexosyl-ceramides
Hex2Cer(d16:1/24:1)	DHC	Di-hexosyl-ceramides
Hex2Cer(d18:1/16:0)	DHC	Di-hexosyl-ceramides
Hex2Cer(d18:1/18:0)	DHC	Di-hexosyl-ceramides
Hex2Cer(d18:1/20:0)	DHC	Di-hexosyl-ceramides
Hex2Cer(d18:1/22:0)	DHC	Di-hexosyl-ceramides
Hex2Cer(d18:1/24:0)	DHC	Di-hexosyl-ceramides
Hex2Cer(d18:1/24:1)	DHC	Di-hexosyl-ceramides
Hex2Cer(d18:2/16:0)	DHC	Di-hexosyl-ceramides
Hex2Cer(d18:2/24:1)	DHC	Di-hexosyl-ceramides
Hex3Cer(d18:1/16:0)	THC	Tri-hexosyl-ceramides
Hex3Cer(d18:1/18:0)	THC	Tri-hexosyl-ceramides
Hex3Cer(d18:1/20:0)	THC	Tri-hexosyl-ceramides
Hex3Cer(d18:1/22:0)	THC	Tri-hexosyl-ceramides
Hex3Cer(d18:1/24:0)	THC	Tri-hexosyl-ceramides
Hex3Cer(d18:1/24:1)	THC	Tri-hexosyl-ceramides
GM3(d18:1/16:0)	GM3	GM3-gangliosides
GM3(d18:1/18:0)	GM3	GM3-gangliosides
GM3(d18:1/20:0)	GM3	GM3-gangliosides
GM3(d18:1/22:0)	GM3	GM3-gangliosides
GM3(d18:1/24:0)	GM3	GM3-gangliosides
GM3(d18:1/24:1)	GM3	GM3-gangliosides
GM1(d18:1/16:0)	GM1	GM1-gangliosides
Sulfatide (d18:1:/16:0(OH))	Sulfatide	Sulfatides
Sulfatide (d18:1:/16:0)	Sulfatide	Sulfatides
Sulfatide (d18:1:/24:0(OH))	Sulfatide	Sulfatides
Sulfatide (d18:1:/24:0)	Sulfatide	Sulfatides
Sulfatide (d18:1:/24:1(OH))	Sulfatide	Sulfatides
Sulfatide (d18:1:/24:1)	Sulfatide	Sulfatides
SM(34:3)	SM	Sphingomyelins
SM(35:2) (b)	SM	Sphingomyelins
SM(37:1)	SM	Sphingomyelins
SM(37:2)	SM	Sphingomyelins
SM(38:3) (a)	SM	Sphingomyelins
SM(38:3) (b)	SM	Sphingomyelins
SM(40:3) (a)	SM	Sphingomyelins
SM(40:3) (b)	SM	Sphingomyelins
SM(41:0)	SM	Sphingomyelins
SM(41:1) (a)	SM	Sphingomyelins
SM(43:1)	SM	Sphingomyelins
SM(43:2) (b)	SM	Sphingomyelins
SM(43:2) (c)	SM	Sphingomyelins
SM(44:1)	SM	Sphingomyelins
SM(44:2)	SM	Sphingomyelins
SM(44:3)	SM	Sphingomyelins
SM(d16:1/19:0)	SM	Sphingomyelins
SM(d16:1/23:0)/SM(d17:1/22:0)	SM	Sphingomyelins
SM(d16:1/24:1)	SM	Sphingomyelins
SM(d17:1/14:0)	SM	Sphingomyelins
SM(d17:1/16:0)	SM	Sphingomyelins
SM(d17:1/24:1)	SM	Sphingomyelins
SM(d18:0/14:0)	SM	Sphingomyelins
SM(d18:0/16:0)	SM	Sphingomyelins
SM(d18:0/22:0)	SM	Sphingomyelins
SM(d18:1/14:0/SM(d16:1/16:0)	SM	Sphingomyelins
SM(d18:1/16:0)	SM	Sphingomyelins
SM(d18:1/17:0)/SM(d17:1/18:0)	SM	Sphingomyelins
SM(d18:1/18:0/SM(d16:1/20:0)	SM	Sphingomyelins
SM(d18:1/20:0)/SM(d16:1/22:0)	SM	Sphingomyelins
SM(d18:1/22:0)/SM(d16:1/24:0)	SM	Sphingomyelins
SM(d18:1/23:0)/SM(d17:1/24:0)	SM	Sphingomyelins
SM(d18:1/24:0)	SM	Sphingomyelins
SM(d18:1/24:1)	SM	Sphingomyelins
SM(d18:2/14:0)	SM	Sphingomyelins
SM(d18:2/16:0)	SM	Sphingomyelins
SM(d18:2/17:0)	SM	Sphingomyelins
SM(d18:2/18:0)	SM	Sphingomyelins
SM(d18:2/18:1)	SM	Sphingomyelins
SM(d18:2/20:0)	SM	Sphingomyelins
SM(d18:2/22:0)	SM	Sphingomyelins
SM(d18:2/23:0)	SM	Sphingomyelins
SM(d18:2/24:0)	SM	Sphingomyelins
SM(d19:1/24:1)	SM	Sphingomyelins
PA(34:1)	PA	Phosphatidic acid
PA(36:1)	PA	Phosphatidic acid
PA(36:2)	PA	Phosphatidic acid
PA(36:3)	PA	Phosphatidic acid
PA(36:4)	PA	Phosphatidic acid
PA(40:6)	PA	Phosphatidic acid
PC(14:0_16:0)	PC	Phosphatidylcholines
PC(14:0_20:4)	PC	Phosphatidylcholines
PC(14:0_22:6)	PC	Phosphatidylcholines
PC(15-MHDA_18:1)	PC	Phosphatidylcholines
PC(15-MHDA_18:2)	PC	Phosphatidylcholines
PC(15-MHDA_20:4)	PC	Phosphatidylcholines
PC(15-MHDA_22:6)	PC	Phosphatidylcholines
PC(15:0_20:3)	PC	Phosphatidylcholines
PC(15:0_20:4)	PC	Phosphatidylcholines
PC(15:0_22:6)	PC	Phosphatidylcholines
PC(16:0_16:0)	PC	Phosphatidylcholines
PC(16:0_18:0)	PC	Phosphatidylcholines
PC(16:0_18:1)	PC	Phosphatidylcholines
PC(16:0_18:2)	PC	Phosphatidylcholines
PC(16:0_18:3) (a)	PC	Phosphatidylcholines
PC(16:0_18:3) (b)	PC	Phosphatidylcholines
PC(16:0_20:3) (a)	PC	Phosphatidylcholines
PC(16:0_20:3) (b)	PC	Phosphatidylcholines
PC(16:0_20:4)	PC	Phosphatidylcholines
PC(16:0_20:5)	PC	Phosphatidylcholines
PC(16:0_22:6)	PC	Phosphatidylcholines
PC(16:1_18:2)	PC	Phosphatidylcholines
PC(16:1_20:4)	PC	Phosphatidylcholines
PC(16:1_22:6)	PC	Phosphatidylcholines
PC(17:0_18:1)	PC	Phosphatidylcholines
PC(17:0_18:2)	PC	Phosphatidylcholines
PC(17:0_20:4)	PC	Phosphatidylcholines
PC(17:0_22:6)	PC	Phosphatidylcholines
PC(17:1_18:2)	PC	Phosphatidylcholines
PC(18:0_18:1)	PC	Phosphatidylcholines
PC(18:0_18:2)	PC	Phosphatidylcholines
PC(18:0_20:3)	PC	Phosphatidylcholines
PC(18:0_20:4)	PC	Phosphatidylcholines
PC(18:0_22:4)	PC	Phosphatidylcholines
PC(18:0_22:5) (n3)	PC	Phosphatidylcholines
PC(18:0_22:5) (n6)	PC	Phosphatidylcholines
PC(18:0_22:6)	PC	Phosphatidylcholines
PC(18:1_18:1)	PC	Phosphatidylcholines
PC(18:1_18:2)	PC	Phosphatidylcholines
PC(18:1_20:3)	PC	Phosphatidylcholines
PC(18:1_22:6) (a)	PC	Phosphatidylcholines
PC(18:1_22:6) (b)	PC	Phosphatidylcholines
PC(18:2_18:2)	PC	Phosphatidylcholines
PC(18:2_20:5)	PC	Phosphatidylcholines
PC(20:0_20:4)	PC	Phosphatidylcholines
PC(28:0)	PC	Phosphatidylcholines
PC(31:0) (a)	PC	Phosphatidylcholines
PC(31:0) (b)	PC	Phosphatidylcholines
PC(32:1)	PC	Phosphatidylcholines
PC(32:2)	PC	Phosphatidylcholines
PC(33:0) (a)	PC	Phosphatidylcholines
PC(33:0) (b)	PC	Phosphatidylcholines
PC(33:1)	PC	Phosphatidylcholines
PC(33:2)	PC	Phosphatidylcholines
PC(34:5)	PC	Phosphatidylcholines
PC(35:5)	PC	Phosphatidylcholines
PC(36:6) (a)	PC	Phosphatidylcholines
PC(38:2)	PC	Phosphatidylcholines
PC(38:4) (b)	PC	Phosphatidylcholines
PC(38:5) (a)	PC	Phosphatidylcholines
PC(38:5) (b)	PC	Phosphatidylcholines
PC(38:6) (a)	PC	Phosphatidylcholines
PC(38:7)(c)	PC	Phosphatidylcholines
PC(39:5)(a)	PC	Phosphatidylcholines
PC(39:5)(b)	PC	Phosphatidylcholines
PC(40:10)	PC	Phosphatidylcholines
PC(40:7) (a)	PC	Phosphatidylcholines
PC(40:8)	PC	Phosphatidylcholines
PC(44:12)	PC	Phosphatidylcholines
PC(O-16:0/16:0)	PC(O)	Alkyl phosphatidylcholines
PC(O-16:0/20:3)	PC(O)	Alkyl phosphatidylcholines
PC(O-16:0/20:4)	PC(O)	Alkyl phosphatidylcholines
PC(O-16:0/22:6)	PC(O)	Alkyl phosphatidylcholines
PC(O-18:0/18:1)	PC(O)	Alkyl phosphatidylcholines
PC(O-18:0/18:2)	PC(O)	Alkyl phosphatidylcholines
PC(O-18:0/20:4)	PC(O)	Alkyl phosphatidylcholines
PC(O-18:0/22:6)	PC(O)	Alkyl phosphatidylcholines
PC(O-18:1/18:1)	PC(O)	Alkyl phosphatidylcholines
PC(O-18:1/18:2)	PC(O)	Alkyl phosphatidylcholines
PC(O-32:1)	PC(O)	Alkyl phosphatidylcholines
PC(O-32:2)	PC(O)	Alkyl phosphatidylcholines
PC(O-34:1)	PC(O)	Alkyl phosphatidylcholines
PC(O-34:2)	PC(O)	Alkyl phosphatidylcholines
PC(O-34:4)	PC(O)	Alkyl phosphatidylcholines
PC(O-35:4)	PC(O)	Alkyl phosphatidylcholines
PC(O-36:0)	PC(O)	Alkyl phosphatidylcholines
PC(O-36:5)	PC(O)	Alkyl phosphatidylcholines
PC(O-38:5)	PC(O)	Alkyl phosphatidylcholines
PC(O-40:5)	PC(O)	Alkyl phosphatidylcholines
PC(O-40:7) (a)	PC(O)	Alkyl phosphatidylcholines
PC(O-40:7) (b)	PC(O)	Alkyl phosphatidylcholines
PC(P-15:0/20:4) (a)	PC(P)	Alkenyl phosphatidylcholines
PC(P-15:0/20:4) (b)	PC(P)	Alkenyl phosphatidylcholines
PC(P-16:0/14:0)	PC(P)	Alkenyl phosphatidylcholines
PC(P-16:0/16:0)	PC(P)	Alkenyl phosphatidylcholines
PC(P-16:0/16:1)	PC(P)	Alkenyl phosphatidylcholines
PC(P-16:0/18:0)	PC(P)	Alkenyl phosphatidylcholines
PC(P-16:0/18:1)	PC(P)	Alkenyl phosphatidylcholines
PC(P-16:0/18:2)	PC(P)	Alkenyl phosphatidylcholines
PC(P-16:0/18:3)	PC(P)	Alkenyl phosphatidylcholines
PC(P-16:0/20:4)	PC(P)	Alkenyl phosphatidylcholines
PC(P-16:0/20:5)	PC(P)	Alkenyl phosphatidylcholines
PC(P-16:0/22:6)	PC(P)	Alkenyl phosphatidylcholines
PC(P-17:0/20:4) (a)	PC(P)	Alkenyl phosphatidylcholines
PC(P-17:0/20:4) (b)	PC(P)	Alkenyl phosphatidylcholines
PC(P-18:0/18:2)	PC(P)	Alkenyl phosphatidylcholines
PC(P-18:0/20:4)	PC(P)	Alkenyl phosphatidylcholines
PC(P-18:0/22:5)	PC(P)	Alkenyl phosphatidylcholines
PC(P-18:0/22:6)	PC(P)	Alkenyl phosphatidylcholines
PC(P-18:1/18:1)	PC(P)	Alkenyl phosphatidylcholines
PC(P-18:1/22:6)	PC(P)	Alkenyl phosphatidylcholines
PC(P-20:0/20:4)	PC(P)	Alkenyl phosphatidylcholines
PC(P-35:2)(a)	PC(P)	Alkenyl phosphatidylcholines
PC(P-35:2)(b)	PC(P)	Alkenyl phosphatidylcholines
PC(P-36:3)	PC(P)	Alkenyl phosphatidylcholines
PC(P-38:5) (a)	PC(P)	Alkenyl phosphatidylcholines
PC(P-38:5) (b)	PC(P)	Alkenyl phosphatidylcholines
LPC(14:0) [sn1]	LPC	Lysophosphatidylcholines
LPC(14:0) [sn2]	LPC	Lysophosphatidylcholines
LPC(15-MHDA) [sn1] [104_sn1]	LPC	Lysophosphatidylcholines
LPC(15-MHDA) [sn1] / LPC(17:0) [sn2]	LPC	Lysophosphatidylcholines
LPC(15-MHDA) [sn2]	LPC	Lysophosphatidylcholines
LPC(15:0) [sn1]	LPC	Lysophosphatidylcholines
LPC(15:0) [sn2]	LPC	Lysophosphatidylcholines
LPC(16:0) [sn1]	LPC	Lysophosphatidylcholines
LPC(16:0) [sn2]	LPC	Lysophosphatidylcholines
LPC(16:1) [sn1]	LPC	Lysophosphatidylcholines
LPC(16:1) [sn2]	LPC	Lysophosphatidylcholines
LPC(17:0) [sn1]	LPC	Lysophosphatidylcholines
LPC(17:1) (a) [sn1] [104_sn1]	LPC	Lysophosphatidylcholines
LPC(17:1) [sn1] (a) / LPC(17:1) [sn2] (b)	LPC	Lysophosphatidylcholines
LPC(17:1) [sn1] (b)	LPC	Lysophosphatidylcholines
LPC(17:1) [sn2] (a)	LPC	Lysophosphatidylcholines
LPC(18:0) [sn1]	LPC	Lysophosphatidylcholines
LPC(18:0) [sn2]	LPC	Lysophosphatidylcholines
LPC(18:1) [sn1]	LPC	Lysophosphatidylcholines
LPC(18:1) [sn2]	LPC	Lysophosphatidylcholines
LPC(18:2) [sn1]	LPC	Lysophosphatidylcholines
LPC(18:2) [sn2]	LPC	Lysophosphatidylcholines
LPC(18:3) (a) [sn1] [104_sn1]	LPC	Lysophosphatidylcholines
LPC(18:3) [sn1] (a)/LPC(18:3) [sn2] (b)	LPC	Lysophosphatidylcholines
LPC(18:3) [sn1] (b)	LPC	Lysophosphatidylcholines
LPC(18:3) [sn2] (a)	LPC	Lysophosphatidylcholines
LPC(19:0) (a) [sn1] [104_sn1]	LPC	Lysophosphatidylcholines
LPC(19:0) [sn1] (a) / LPC(19:0) [sn2] (b)	LPC	Lysophosphatidylcholines
LPC(19:0) [sn1] (b)	LPC	Lysophosphatidylcholines
LPC(19:0) [sn2] (a)	LPC	Lysophosphatidylcholines
LPC(19:1) (a)	LPC	Lysophosphatidylcholines
LPC(19:1) (b)	LPC	Lysophosphatidylcholines
LPC(19:1) (c)	LPC	Lysophosphatidylcholines
LPC(20:0) [sn1]	LPC	Lysophosphatidylcholines
LPC(20:0) [sn2]	LPC	Lysophosphatidylcholines
LPC(20:1) [sn1]	LPC	Lysophosphatidylcholines
LPC(20:1) [sn2]	LPC	Lysophosphatidylcholines
LPC(20:2) [sn1]	LPC	Lysophosphatidylcholines
LPC(20:2) [sn2]	LPC	Lysophosphatidylcholines
LPC(20:3) [sn1]	LPC	Lysophosphatidylcholines
LPC(20:3) [sn2]	LPC	Lysophosphatidylcholines
LPC(20:4) [sn1]	LPC	Lysophosphatidylcholines
LPC(20:4) [sn2]	LPC	Lysophosphatidylcholines
LPC(20:5) [sn1]	LPC	Lysophosphatidylcholines
LPC(20:5) [sn2]	LPC	Lysophosphatidylcholines
LPC(22:0) [sn1]	LPC	Lysophosphatidylcholines
LPC(22:0) [sn2]	LPC	Lysophosphatidylcholines
LPC(22:1) [sn1]	LPC	Lysophosphatidylcholines
LPC(22:1) [sn2]	LPC	Lysophosphatidylcholines
LPC(22:4) [sn1]	LPC	Lysophosphatidylcholines
LPC(22:4) [sn2]	LPC	Lysophosphatidylcholines
LPC(22:5) (n3) [sn1] [104_sn1]	LPC	Lysophosphatidylcholines
LPC(22:5) [sn1] (n3)/LPC(22:5) [sn2] (n6)	LPC	Lysophosphatidylcholines
LPC(22:5) [sn1] (n6)	LPC	Lysophosphatidylcholines
LPC(22:5) [sn2] (n3)	LPC	Lysophosphatidylcholines
LPC(22:6) [sn1]	LPC	Lysophosphatidylcholines
LPC(22:6) [sn2]	LPC	Lysophosphatidylcholines
LPC(24:0) [sn1]	LPC	Lysophosphatidylcholines
LPC(24:0) [sn2]	LPC	Lysophosphatidylcholines
LPC(26:0) [sn1]	LPC	Lysophosphatidylcholines
LPC(26:0) [sn2]	LPC	Lysophosphatidylcholines
LPC(O-16:0)	LPC(O)	Lysoalkyl phosphatidylcholines
LPC(O-18:0)	LPC(O)	Lysoalkyl phosphatidylcholines
LPC(O-18:1)	LPC(O)	Lysoalkyl phosphatidylcholines
LPC(O-20:0)	LPC(O)	Lysoalkyl phosphatidylcholines
LPC(O-20:1)	LPC(O)	Lysoalkyl phosphatidylcholines
LPC(O-22:0)	LPC(O)	Lysoalkyl phosphatidylcholines
LPC(O-22:1)	LPC(O)	Lysoalkyl phosphatidylcholines
LPC(O-24:0)	LPC(O)	Lysoalkyl phosphatidylcholines
LPC(O-24:1)	LPC(O)	Lysoalkyl phosphatidylcholines
LPC(O-24:2)	LPC(O)	Lysoalkyl phosphatidylcholines
LPC(P-16:0)	LPC(P)	Lysoalkenyl phosphatidylcholines
LPC(P-17:0) (a)	LPC(P)	Lysoalkenyl phosphatidylcholines
LPC(P-17:0) (b)	LPC(P)	Lysoalkenyl phosphatidylcholines
LPC(P-18:0)	LPC(P)	Lysoalkenyl phosphatidylcholines
LPC(P-18:1)	LPC(P)	Lysoalkenyl phosphatidylcholines
LPC(P-20:0)	LPC(P)	Lysoalkenyl phosphatidylcholines
PE(15-MHDA_18:1)	PE	Phosphatidylethanolamines
PE(15-MHDA_18:2)	PE	Phosphatidylethanolamines
PE(15-MHDA_20:4)	PE	Phosphatidylethanolamines
PE(15-MHDA_22:6)	PE	Phosphatidylethanolamines
PE(16:0_16:0)	PE	Phosphatidylethanolamines
PE(16:0_16:1)	PE	Phosphatidylethanolamines
PE(16:0_18:1)	PE	Phosphatidylethanolamines
PE(16:0_18:2)	PE	Phosphatidylethanolamines
PE(16:0_18:3) (a)	PE	Phosphatidylethanolamines
PE(16:0_18:3) (b)	PE	Phosphatidylethanolamines
PE(16:0_20:3)	PE	Phosphatidylethanolamines
PE(16:0_20:4)	PE	Phosphatidylethanolamines
PE(16:0_20:5)	PE	Phosphatidylethanolamines
PE(16:0_22:6)	PE	Phosphatidylethanolamines
PE(16:1_18:2)	PE	Phosphatidylethanolamines
PE(16:1_20:4)	PE	Phosphatidylethanolamines
PE(17:0_18:1)	PE	Phosphatidylethanolamines
PE(17:0_18:2)	PE	Phosphatidylethanolamines
PE(17:0_20:4)	PE	Phosphatidylethanolamines
PE(17:0_22:6)	PE	Phosphatidylethanolamines
PE(18:0_18:1)	PE	Phosphatidylethanolamines
PE(18:0_18:2)	PE	Phosphatidylethanolamines
PE(18:0_20:3) (a)	PE	Phosphatidylethanolamines
PE(18:0_20:3) (b)	PE	Phosphatidylethanolamines
PE(18:0_20:4)	PE	Phosphatidylethanolamines
PE(18:0_22:4)	PE	Phosphatidylethanolamines
PE(18:0_22:5) (n3)	PE	Phosphatidylethanolamines
PE(18:0_22:5) (n6)	PE	Phosphatidylethanolamines
PE(18:0_22:6)	PE	Phosphatidylethanolamines
PE(18:1_18:1)	PE	Phosphatidylethanolamines
PE(18:1_18:2)	PE	Phosphatidylethanolamines
PE(18:1_22:6) (a)	PE	Phosphatidylethanolamines
PE(18:1_22:6) (b)	PE	Phosphatidylethanolamines
PE(20:0_20:4)	PE	Phosphatidylethanolamines
PE(36:0)	PE	Phosphatidylethanolamines
PE(38:5) (a)	PE	Phosphatidylethanolamines
PE(38:5) (b)	PE	Phosphatidylethanolamines
PE(O-16:0/18:2)	PE(O)	Alkylphosphatidylethanolamines
PE(O-16:0/20:3)	PE(O)	Alkylphosphatidylethanolamines
PE(O-16:0/20:4)	PE(O)	Alkylphosphatidylethanolamines
PE(O-16:0/22:4)	PE(O)	Alkylphosphatidylethanolamines
PE(O-16:0/22:6)	PE(O)	Alkylphosphatidylethanolamines
PE(O-18:0/20:4)	PE(O)	Alkylphosphatidylethanolamines
PE(O-18:0/22:5)	PE(O)	Alkylphosphatidylethanolamines
PE(O-18:0/22:6)	PE(O)	Alkylphosphatidylethanolamines
PE(O-18:1/18:2)	PE(O)	Alkylphosphatidylethanolamines
PE(O-18:1/22:6)	PE(O)	Alkylphosphatidylethanolamines
PE(O-34:1)	PE(O)	Alkylphosphatidylethanolamines
PE(O-36:5)	PE(O)	Alkylphosphatidylethanolamines
PE(O-38:5) (a)	PE(O)	Alkylphosphatidylethanolamines
PE(O-38:5) (b)	PE(O)	Alkylphosphatidylethanolamines
PE(P-15:0/20:4) (a)	PE(P)	Alkenylphosphatidylethanolamines
PE(P-15:0/20:4) (b)	PE(P)	Alkenylphosphatidylethanolamines
PE(P-15:0/22:6) (a)	PE(P)	Alkenylphosphatidylethanolamines
PE(P-15:0/22:6) (b)	PE(P)	Alkenylphosphatidylethanolamines
PE(P-16:0/18:1)	PE(P)	Alkenylphosphatidylethanolamines
PE(P-16:0/18:2)	PE(P)	Alkenylphosphatidylethanolamines
PE(P-16:0/18:3)	PE(P)	Alkenylphosphatidylethanolamines
PE(P-16:0/20:3) (a)	PE(P)	Alkenylphosphatidylethanolamines
PE(P-16:0/20:3) (b)	PE(P)	Alkenylphosphatidylethanolamines
PE(P-16:0/20:4)	PE(P)	Alkenylphosphatidylethanolamines
PE(P-16:0/20:5)	PE(P)	Alkenylphosphatidylethanolamines
PE(P-16:0/22:4)	PE(P)	Alkenylphosphatidylethanolamines
PE(P-16:0/22:5) (n3)	PE(P)	Alkenylphosphatidylethanolamines
PE(P-16:0/22:5) (n6)	PE(P)	Alkenylphosphatidylethanolamines
PE(P-16:0/22:6)	PE(P)	Alkenylphosphatidylethanolamines
PE(P-17:0/20:4) (a)	PE(P)	Alkenylphosphatidylethanolamines
PE(P-17:0/20:4) (b)	PE(P)	Alkenylphosphatidylethanolamines
PE(P-17:0/22:6) (a)	PE(P)	Alkenylphosphatidylethanolamines
PE(P-17:0/22:6) (b)	PE(P)	Alkenylphosphatidylethanolamines
PE(P-18:0/18:1)	PE(P)	Alkenylphosphatidylethanolamines
PE(P-18:0/18:2)	PE(P)	Alkenylphosphatidylethanolamines
PE(P-18:0/18:3)	PE(P)	Alkenylphosphatidylethanolamines
PE(P-18:0/20:3) (a)	PE(P)	Alkenylphosphatidylethanolamines
PE(P-18:0/20:3) (b)	PE(P)	Alkenylphosphatidylethanolamines
PE(P-18:0/20:4)	PE(P)	Alkenylphosphatidylethanolamines
PE(P-18:0/20:5)	PE(P)	Alkenylphosphatidylethanolamines
PE(P-18:0/22:4)	PE(P)	Alkenylphosphatidylethanolamines
PE(P-18:0/22:5) (n3)	PE(P)	Alkenylphosphatidylethanolamines
PE(P-18:0/22:5) (n6)	PE(P)	Alkenylphosphatidylethanolamines
PE(P-18:0/22:6)	PE(P)	Alkenylphosphatidylethanolamines
PE(P-18:1/18:1)	PE(P)	Alkenylphosphatidylethanolamines
PE(P-18:1/18:1) (a)	PE(P)	Alkenylphosphatidylethanolamines
PE(P-18:1/18:1) (b)	PE(P)	Alkenylphosphatidylethanolamines
PE(P-18:1/18:2) (a)	PE(P)	Alkenylphosphatidylethanolamines
PE(P-18:1/18:2) (b)	PE(P)	Alkenylphosphatidylethanolamines
PE(P-18:1/18:3)	PE(P)	Alkenylphosphatidylethanolamines
PE(P-18:1/20:3) (a)	PE(P)	Alkenylphosphatidylethanolamines
PE(P-18:1/20:3) (b)	PE(P)	Alkenylphosphatidylethanolamines
PE(P-18:1/20:4) (a)	PE(P)	Alkenylphosphatidylethanolamines
PE(P-18:1/20:4) (b)	PE(P)	Alkenylphosphatidylethanolamines
PE(P-18:1/20:5) (a)	PE(P)	Alkenylphosphatidylethanolamines
PE(P-18:1/20:5) (b)	PE(P)	Alkenylphosphatidylethanolamines
PE(P-18:1/22:4)	PE(P)	Alkenylphosphatidylethanolamines
PE(P-18:1/22:5) (a)	PE(P)	Alkenylphosphatidylethanolamines
PE(P-18:1/22:5) (b)	PE(P)	Alkenylphosphatidylethanolamines
PE(P-18:1/22:6) (a)	PE(P)	Alkenylphosphatidylethanolamines
PE(P-18:1/22:6) (b)	PE(P)	Alkenylphosphatidylethanolamines
PE(P-19:0/20:4) (a)	PE(P)	Alkenylphosphatidylethanolamines
PE(P-19:0/20:4) (b)	PE(P)	Alkenylphosphatidylethanolamines
PE(P-20:0/18:1)	PE(P)	Alkenylphosphatidylethanolamines
PE(P-20:0/18:2)	PE(P)	Alkenylphosphatidylethanolamines
PE(P-20:0/20:4)	PE(P)	Alkenylphosphatidylethanolamines
PE(P-20:0/22:6)	PE(P)	Alkenylphosphatidylethanolamines
PE(P-20:1/20:4)	PE(P)	Alkenylphosphatidylethanolamines
PE(P-20:1/22:6)	PE(P)	Alkenylphosphatidylethanolamines
LPE(16:0) [sn1]	LPE	Lysophosphatidylethanolamines
LPE(16:0) [sn2]	LPE	Lysophosphatidylethanolamines
LPE(17:0) [sn1]	LPE	Lysophosphatidylethanolamines
LPE(17:0) [sn2]	LPE	Lysophosphatidylethanolamines
LPE(18:0) [sn1]	LPE	Lysophosphatidylethanolamines
LPE(18:0) [sn2]	LPE	Lysophosphatidylethanolamines
LPE(18:1) [sn1]	LPE	Lysophosphatidylethanolamines
LPE(18:1) [sn2]	LPE	Lysophosphatidylethanolamines
LPE(18:2) [sn1]	LPE	Lysophosphatidylethanolamines
LPE(18:2) [sn2]	LPE	Lysophosphatidylethanolamines
LPE(20:4) [sn1]	LPE	Lysophosphatidylethanolamines
LPE(20:4) [sn2]	LPE	Lysophosphatidylethanolamines
LPE(22:6) [sn1]	LPE	Lysophosphatidylethanolamines
LPE(22:6) [sn2]	LPE	Lysophosphatidylethanolamines
LPE(P-16:0)	LPE(P)	Lysoalkenylphosphatidylethanolamines
LPE(P-18:0)	LPE(P)	Lysoalkenylphosphatidylethanolamines
LPE(P-18:1)	LPE(P)	Lysoalkenylphosphatidylethanolamines
LPE(P-20:0)	LPE(P)	Lysoalkenylphosphatidylethanolamines
PI (38:5) (b)	PI	Phosphatidylinositols
PI(15-MHDA_20:4)\PI(17:0_20:4)	PI	Phosphatidylinositols
PI(16:0_16:1)	PI	Phosphatidylinositols
PI(16:0_20:3) (a)	PI	Phosphatidylinositols
PI(16:0_20:3) (b)	PI	Phosphatidylinositols
PI(16:0_20:4)	PI	Phosphatidylinositols
PI(16:0/16:0)	PI	Phosphatidylinositols
PI(17:0_18:1)	PI	Phosphatidylinositols
PI(17:0_18:2)	PI	Phosphatidylinositols
PI(18:0_18:1)	PI	Phosphatidylinositols
PI(18:0_20:2)	PI	Phosphatidylinositols
PI(18:0_20:3) (a)	PI	Phosphatidylinositols
PI(18:0_20:3) (b)	PI	Phosphatidylinositols
PI(18:0_20:4)	PI	Phosphatidylinositols
PI(18:0_22:4)	PI	Phosphatidylinositols
PI(18:0_22:5) (n3)	PI	Phosphatidylinositols
PI(18:0_22:5) (n6)	PI	Phosphatidylinositols
PI(18:0_22:6)	PI	Phosphatidylinositols
PI(18:1_18:2)	PI	Phosphatidylinositols
PI(20:0_20:4)	PI	Phosphatidylinositols
PI(34:0)	PI	Phosphatidylinositols
PI(34:1)	PI	Phosphatidylinositols
PI(36:2)	PI	Phosphatidylinositols
PI(37:6)	PI	Phosphatidylinositols
PI(38:5) (a)	PI	Phosphatidylinositols
PI(38:6)	PI	Phosphatidylinositols
PI(39:6)	PI	Phosphatidylinositols
PIP1(38:4)	PIP1	Phosphatidylinositol phosphate
LPI(18:0) [sn1]	LPI	Lysophosphatidylinositols
LPI(18:0) [sn2]	LPI	Lysophosphatidylinositols
LPI(18:1) [sn1]	LPI	Lysophosphatidylinositols
LPI(18:1) [sn2]	LPI	Lysophosphatidylinositols
LPI(18:2) [sn1]	LPI	Lysophosphatidylinositols
LPI(18:2) [sn2]	LPI	Lysophosphatidylinositols
LPI(20:4) [sn1]	LPI	Lysophosphatidylinositols
LPI(20:4) [sn2]	LPI	Lysophosphatidylinositols
PS(36:1)	PS	Phosphatidylserines
PS(36:2)	PS	Phosphatidylserines
PS(38:3)	PS	Phosphatidylserines
PS(38:4)	PS	Phosphatidylserines
PS(38:5)	PS	Phosphatidylserines
PS(40:5)	PS	Phosphatidylserines
PS(40:6)	PS	Phosphatidylserines
PG(34:1)	PG	Phosphatidylglycerols
PG(36:1)	PG	Phosphatidylglycerols
PG(36:2)	PG	Phosphatidylglycerols
CE(14:0)	CE	Cholesteryl esters
CE(15:0)	CE	Cholesteryl esters
CE(16:0)	CE	Cholesteryl esters
CE(16:1)	CE	Cholesteryl esters
CE(16:2)	CE	Cholesteryl esters
CE(17:0)	CE	Cholesteryl esters
CE(17:1)	CE	Cholesteryl esters
CE(18:0)	CE	Cholesteryl esters
CE(18:1)	CE	Cholesteryl esters
CE(18:2)	CE	Cholesteryl esters
CE(18:3)	CE	Cholesteryl esters
CE(20:0)	CE	Cholesteryl esters
CE(20:1)	CE	Cholesteryl esters
CE(20:2)	CE	Cholesteryl esters
CE(20:3)	CE	Cholesteryl esters
CE(20:4)	CE	Cholesteryl esters
CE(20:5)	CE	Cholesteryl esters
CE(22:0)	CE	Cholesteryl esters
CE(22:1)	CE	Cholesteryl esters
CE(22:4)	CE	Cholesteryl esters
CE(22:5) (n3)	CE	Cholesteryl esters
CE(22:5) (n6)	CE	Cholesteryl esters
CE(22:6)	CE	Cholesteryl esters
CE(24:0)	CE	Cholesteryl esters
CE(24:1)	CE	Cholesteryl esters
CE(24:4)	CE	Cholesteryl esters
CE(24:5)	CE	Cholesteryl esters
CE(24:6)	CE	Cholesteryl esters
COH	COH	Free cholesterol
DE(16:0)	DE	Dehydro-cholesteryl esters
DE(18:1)	DE	Dehydro-cholesteryl esters
DE(18:2)	DE	Dehydro-cholesteryl esters
DE(20:4)	DE	Dehydro-cholesteryl esters
DE(20:5)	DE	Dehydro-cholesteryl esters
DE(22:6)	DE	Dehydro-cholesteryl esters
FA(14:0)	FFA	Free fatty acids
FA(15:0)	FFA	Free fatty acids
FA(16:0)	FFA	Free fatty acids
FA(16:1)	FFA	Free fatty acids
FA(16:2)	FFA	Free fatty acids
FA(17:0)	FFA	Free fatty acids
FA(17:1)	FFA	Free fatty acids
FA(18:0)	FFA	Free fatty acids
FA(18:1)	FFA	Free fatty acids
FA(18:2)	FFA	Free fatty acids
FA(18:3)	FFA	Free fatty acids
FA(20:2)	FFA	Free fatty acids
FA(20:3)	FFA	Free fatty acids
FA(20:4)	FFA	Free fatty acids
FA(20:5)	FFA	Free fatty acids
FA(22:4)	FFA	Free fatty acids
FA(22:5)	FFA	Free fatty acids
FA(22:6)	FFA	Free fatty acids
AC(12:0)	Acylcarnitine	Acylcarnitines
AC(13:0)	Acylcarnitine	Acylcarnitines
AC(14:0)	Acylcarnitine	Acylcarnitines
AC(14:1)	Acylcarnitine	Acylcarnitines
AC(14:2)	Acylcarnitine	Acylcarnitines
AC(15:0) (a)	Acylcarnitine	Acylcarnitines
AC(15:0) (b)	Acylcarnitine	Acylcarnitines
AC(16:0)	Acylcarnitine	Acylcarnitines
AC(16:1)	Acylcarnitine	Acylcarnitines
AC(17:0) (a)	Acylcarnitine	Acylcarnitines
AC(17:0) (b)	Acylcarnitine	Acylcarnitines
AC(18:0)	Acylcarnitine	Acylcarnitines
AC(18:1)	Acylcarnitine	Acylcarnitines
AC(18:2)	Acylcarnitine	Acylcarnitines
DG(14:0_16:0)	DG	Diacylglycerols
DG(14:0_18:2)	DG	Diacylglycerols
DG(16:0_16:0)	DG	Diacylglycerols
DG(16:0_16:1)	DG	Diacylglycerols
DG(16:0_18:1)	DG	Diacylglycerols
DG(16:0_18:2)	DG	Diacylglycerols
DG(16:0_20:4)	DG	Diacylglycerols
DG(16:0_22:5)	DG	Diacylglycerols
DG(16:0_22:6)	DG	Diacylglycerols
DG(16:1_18:1)	DG	Diacylglycerols
DG(18:0_18:1)	DG	Diacylglycerols
DG(18:0_18:2)	DG	Diacylglycerols
DG(18:0_20:4)	DG	Diacylglycerols
DG(18:0_22:6)	DG	Diacylglycerols
DG(18:1_18:1)	DG	Diacylglycerols
DG(18:1_18:2)	DG	Diacylglycerols
DG(18:1_18:3)	DG	Diacylglycerols
DG(18:1_20:3)	DG	Diacylglycerols
DG(18:1_20:4)	DG	Diacylglycerols
DG(18:1_20:5)	DG	Diacylglycerols
DG(18:1_22:5)	DG	Diacylglycerols
DG(18:1_22:6)	DG	Diacylglycerols
DG(18:2_18:2)	DG	Diacylglycerols
DG(18:2_20:4)	DG	Diacylglycerols
DG(18:2_22:6)	DG	Diacylglycerols
TG(48:0) [NL-16:0]	TG	Triacylglycerols
TG(48:0) [NL-18:0]	TG	Triacylglycerols
TG(48:1) [NL-16:1]	TG	Triacylglycerols
TG(48:1) [NL-18:1]	TG	Triacylglycerols
TG(48:2) [NL-14:0]	TG	Triacylglycerols
TG(48:2) [NL-14:1]	TG	Triacylglycerols
TG(48:2) [NL-16:1]	TG	Triacylglycerols
TG(48:2) [NL-18:2]	TG	Triacylglycerols
TG(48:3) [NL-14:0]	TG	Triacylglycerols
TG(48:3) [NL-16:1]	TG	Triacylglycerols
TG(48:3) [NL-18:3]	TG	Triacylglycerols
TG(49:1) [NL-16:1]	TG	Triacylglycerols
TG(49:1) [NL-17:1]	TG	Triacylglycerols
TG(50:0) [NL-18:0]	TG	Triacylglycerols
TG(50:1) [NL-14:0]	TG	Triacylglycerols
TG(50:1) [NL-16:0]	TG	Triacylglycerols
TG(50:1) [NL-18:1]	TG	Triacylglycerols
TG(50:2) [NL-14:0]	TG	Triacylglycerols
TG(50:2) [NL-16:1]	TG	Triacylglycerols
TG(50:2) [NL-18:1]	TG	Triacylglycerols
TG(50:2) [NL-18:2]	TG	Triacylglycerols
TG(50:3) [NL-14:0]	TG	Triacylglycerols
TG(50:3) [NL-14:1]	TG	Triacylglycerols
TG(50:3) [NL-16:1]	TG	Triacylglycerols
TG(50:3) [NL-18:2]	TG	Triacylglycerols
TG(50:3) [NL-18:3]	TG	Triacylglycerols
TG(50:4) [NL-14:0]	TG	Triacylglycerols
TG(50:4) [NL-18:3]	TG	Triacylglycerols
TG(50:4) [NL-20:4]	TG	Triacylglycerols
TG(51:0) [NL-16:0]	TG	Triacylglycerols
TG(51:1) [NL-17:0]	TG	Triacylglycerols
TG(51:2) [NL-15:0]	TG	Triacylglycerols
TG(51:2) [NL-17:0]	TG	Triacylglycerols
TG(51:2) [NL-17:1]	TG	Triacylglycerols
TG(52:1) [NL-18:0]	TG	Triacylglycerols
TG(52:1) [NL-18:1]	TG	Triacylglycerols
TG(52:2) [NL-16:0]	TG	Triacylglycerols
TG(52:2) [NL-18:2]	TG	Triacylglycerols
TG(52:3) [NL-16:1]	TG	Triacylglycerols
TG(52:3) [NL-18:2]	TG	Triacylglycerols
TG(52:4) [NL-16:1]	TG	Triacylglycerols
TG(52:4) [NL-18:2]	TG	Triacylglycerols
TG(52:4) [NL-18:3]	TG	Triacylglycerols
TG(52:5) [NL-18:3]	TG	Triacylglycerols
TG(52:5) [NL-20:4]	TG	Triacylglycerols
TG(52:5) [NL-20:5]	TG	Triacylglycerols
TG(53:2) [NL-17:1]	TG	Triacylglycerols
TG(53:2) [NL-18:1]	TG	Triacylglycerols
TG(54:0) [NL-18:0]	TG	Triacylglycerols
TG(54:1) [NL-18:1]	TG	Triacylglycerols
TG(54:2) [NL-18:0]	TG	Triacylglycerols
TG(54:2) [NL-20:1]	TG	Triacylglycerols
TG(54:3) [NL-18:1]	TG	Triacylglycerols
TG(54:3) [NL-18:2]	TG	Triacylglycerols
TG(54:4) [NL-18:2]	TG	Triacylglycerols
TG(54:4) [NL-20:3]	TG	Triacylglycerols
TG(54:5) [NL-18:3]	TG	Triacylglycerols
TG(54:5) [NL-20:4]	TG	Triacylglycerols
TG(54:6) [NL-18:3]	TG	Triacylglycerols
TG(54:6) [NL-20:4]	TG	Triacylglycerols
TG(54:6) [NL-20:5]	TG	Triacylglycerols
TG(54:6) [NL-22:6]	TG	Triacylglycerols
TG(54:7) [NL-20:5]	TG	Triacylglycerols
TG(54:7) [NL-22:6]	TG	Triacylglycerols
TG(56:6) [NL-20:4]	TG	Triacylglycerols
TG(56:6) [NL-22:5](a)	TG	Triacylglycerols
TG(56:6) [NL-22:5](b)	TG	Triacylglycerols
TG(56:7) [NL-20:4]	TG	Triacylglycerols
TG(56:7) [NL-20:5]	TG	Triacylglycerols
TG(56:7) [NL-22:5](a)	TG	Triacylglycerols
TG(56:7) [NL-22:5](b)	TG	Triacylglycerols
TG(56:7) [NL-22:6]	TG	Triacylglycerols
TG(56:8) [NL-20:4]	TG	Triacylglycerols
TG(56:8) [NL-20:5]	TG	Triacylglycerols
TG(56:8) [NL-22:6]	TG	Triacylglycerols
TG(56:9) [NL-22:6]	TG	Triacylglycerols
TG(58:10) [NL-22:6]	TG	Triacylglycerols
TG(58:8) [NL-22:6]	TG	Triacylglycerols
TG(58:9) [NL-22:6]	TG	Triacylglycerols
TG(O-50:1) [NL-15:0]	TG(O)	Alkyldiacylglycerols
TG(O-50:1) [NL-16:0]	TG(O)	Alkyldiacylglycerols
TG(O-50:1) [NL-17:1]	TG(O)	Alkyldiacylglycerols
TG(O-50:1) [NL-18:1]	TG(O)	Alkyldiacylglycerols
TG(O-50:2) [NL-16:1]	TG(O)	Alkyldiacylglycerols
TG(O-50:2) [NL-18:1]	TG(O)	Alkyldiacylglycerols
TG(O-50:2) [NL-18:2]	TG(O)	Alkyldiacylglycerols
TG(O-50:3) [NL-18:2]	TG(O)	Alkyldiacylglycerols
TG(O-52:0) [NL-16:0]	TG(O)	Alkyldiacylglycerols
TG(O-52:1) [NL-16:0]	TG(O)	Alkyldiacylglycerols
TG(O-52:1) [NL-18:1]	TG(O)	Alkyldiacylglycerols
TG(O-52:2) [NL-16:0]	TG(O)	Alkyldiacylglycerols
TG(O-52:2) [NL-17:1]	TG(O)	Alkyldiacylglycerols
TG(O-52:2) [NL-18:1]	TG(O)	Alkyldiacylglycerols
TG(O-54:2) [NL-17:1]	TG(O)	Alkyldiacylglycerols
TG(O-54:2) [NL-18:1]	TG(O)	Alkyldiacylglycerols
TG(O-54:3) [NL-17:1]	TG(O)	Alkyldiacylglycerols
TG(O-54:3) [NL-18:1]	TG(O)	Alkyldiacylglycerols
TG(O-54:4) [NL-17:1]	TG(O)	Alkyldiacylglycerols
TG(O-54:4) [NL-18:2]	TG(O)	Alkyldiacylglycerols
Ubiquinone	Ubiquinone	Ubiquinone
CE(18:2) [+OH]	OxSpecies	Oxidised species
CE(20:4) [+OH]	OxSpecies	Oxidised species
CE(22:6) [+OH]	OxSpecies	Oxidised species
LPC(18:2) [+OH]	OxSpecies	Oxidised species
LPC(20:4) [+OH]	OxSpecies	Oxidised species
LPC(22:6) [+OH]	OxSpecies	Oxidised species
PC(34:2) [+OH]	OxSpecies	Oxidised species
PC(36:4) [+OH]	OxSpecies	Oxidised species
PC(38:6) [+OH]	OxSpecies	Oxidised species

## Sheet: S5
S5: Spearman correlation (rho) of NMR biomarkers and lipid class totals at 6 months
	LC/MS lipid class	Sph		S1P		dhCer		Cer		C1P		MHC		DHC		THC		GM3		GM1		Sulfatide		SM		PA		PC		PC(O)		PC(P)		LPC		LPC(O)		LPC(P)		PE		PE(O)		PE(P)		LPE		LPE(P)
#	NMR biomarker	rho	p	rho	p	rho	p	rho	p	rho	p	rho	p	rho	p	rho	p	rho	p	rho	p	rho	p	rho	p	rho	p	rho	p	rho	p	rho	p	rho	p	rho	p	rho	p	rho	p	rho	p	rho	p	rho	p	rho	p
1	Total_C	0.0171494	0.685513	0.114081	0.00688293	0.435303	<1E-15	0.430912	<1E-15	0.298413	5.56e-13	0.196286	2.86598e-06	0.225451	6.93667e-08	0.484566	<1E-15	0.414412	<1E-15	0.360801	<1E-15	0.511624	<1E-15	0.634423	<1E-15	0.103076	0.0146762	0.558055	<1E-15	0.463915	<1E-15	0.548451	<1E-15	0.315016	2.28706e-14	0.239959	8.92412e-09	0.372465	<1E-15	0.161592	0.000122692	0.426952	<1E-15	0.448467	<1E-15	0.231039	3.19935e-08	0.286409	4.92362e-12
2	non_HDL_C	-0.000188799	0.996443	0.0593493	0.160748	0.432424	<1E-15	0.461058	<1E-15	0.180856	1.66367e-05	0.177664	2.35153e-05	0.201187	1.5909e-06	0.36719	<1E-15	0.354901	<1E-15	0.326134	2.44249e-15	0.42531	<1E-15	0.55353	<1E-15	0.0520021	0.219193	0.489429	<1E-15	0.353677	<1E-15	0.400877	<1E-15	0.248271	2.59214e-09	0.196214	2.89066e-06	0.283152	8.74301e-12	0.254485	9.98639e-10	0.357434	<1E-15	0.356402	<1E-15	0.173168	3.79009e-05	0.21205	4.09438e-07
3	Remnant_C	-0.00277431	0.947771	0.0373973	0.377067	0.426279	<1E-15	0.495641	<1E-15	0.13606	0.00124839	0.128349	0.0023415	0.19269	4.37366e-06	0.31848	1.15463e-14	0.291527	1.96732e-12	0.286828	4.57057e-12	0.411492	<1E-15	0.520047	<1E-15	0.0476103	0.26068	0.504405	<1E-15	0.325479	2.66454e-15	0.351774	<1E-15	0.23448	1.96709e-08	0.172607	4.01945e-05	0.233819	2.1609e-08	0.356388	<1E-15	0.294537	1.13687e-12	0.303012	2.34479e-13	0.211956	4.14391e-07	0.177305	2.44415e-05
4	VLDL_C	-0.0463407	0.273622	-0.0546969	0.196205	0.309646	6.57252e-14	0.523195	<1E-15	-0.00667014	0.874856	-0.0370439	0.381595	0.09586	0.0232914	0.118213	0.00509418	0.0909426	0.0314174	0.141233	0.000803678	0.2633	2.46909e-10	0.311704	4.39648e-14	-0.00474648	0.910766	0.423316	<1E-15	0.148195	0.000433917	0.127903	0.00242584	0.101794	0.0159632	0.0355151	0.401566	0.0244946	0.562968	0.561577	<1E-15	0.0882416	0.0368353	0.0811634	0.0549143	0.218099	1.86291e-07	-0.0114806	0.786328
5	Clinical_LDL_C	0.00792703	0.851526	0.0804391	0.0571234	0.416583	<1E-15	0.386666	<1E-15	0.206716	8.04544e-07	0.232628	2.55829e-08	0.211766	4.24604e-07	0.392253	<1E-15	0.390562	<1E-15	0.354063	<1E-15	0.415149	<1E-15	0.559967	<1E-15	0.0585201	0.166687	0.427225	<1E-15	0.357254	<1E-15	0.420528	<1E-15	0.25411	1.05864e-09	0.224356	8.05372e-08	0.32822	1.55431e-15	0.103841	0.0139528	0.390362	<1E-15	0.386897	<1E-15	0.105702	0.0123219	0.247154	3.06907e-09
6	LDL_C	0.000659874	0.987569	0.073091	0.083971	0.418988	<1E-15	0.416507	<1E-15	0.21033	5.10098e-07	0.213919	3.21817e-07	0.198051	2.32246e-06	0.39091	<1E-15	0.389285	<1E-15	0.345706	<1E-15	0.425452	<1E-15	0.559639	<1E-15	0.0525166	0.214662	0.459647	<1E-15	0.364723	<1E-15	0.428417	<1E-15	0.247245	3.02691e-09	0.206725	8.03665e-07	0.311768	4.35207e-14	0.161737	0.000120953	0.394325	<1E-15	0.388669	<1E-15	0.133743	0.00151331	0.230644	3.38155e-08
7	HDL_C	0.0178738	0.672982	0.164485	9.21476e-05	0.186346	9.04488e-06	0.0966733	0.02214	0.445357	<1E-15	0.156069	0.000209095	0.171807	4.36907e-05	0.500413	<1E-15	0.335764	4.44089e-16	0.23062	3.3928e-08	0.418811	<1E-15	0.438878	<1E-15	0.157	0.000191369	0.390442	<1E-15	0.472262	<1E-15	0.590672	<1E-15	0.292977	1.51168e-12	0.19078	5.45688e-06	0.365957	<1E-15	-0.156272	0.000205111	0.345231	<1E-15	0.416324	<1E-15	0.265464	1.73816e-10	0.29213	1.76348e-12
8	Total_TG	-0.212796	3.72006e-07	-0.239223	9.93458e-09	0.169015	5.82881e-05	0.470648	<1E-15	-0.0860793	0.0417265	-0.181138	1.61314e-05	-0.0257157	0.543662	0.00363153	0.931668	-0.0314512	0.457607	-0.0251001	0.553354	0.127527	0.00249905	0.0852175	0.0438233	-0.137886	0.00107045	0.4139	<1E-15	0.0702039	0.0969823	0.017952	0.671633	-0.107869	0.010637	-0.208174	6.70076e-07	-0.246406	3.43454e-09	0.725701	<1E-15	-0.0117344	0.781721	-0.0530373	0.210144	0.300145	4.02345e-13	-0.25784	5.90293e-10
9	VLDL_TG	-0.250642	1.80674e-09	-0.276372	2.82112e-11	0.110894	0.0086276	0.436923	<1E-15	-0.118024	0.00516592	-0.208339	6.5635e-07	-0.0645722	0.126951	-0.0417044	0.32456	-0.0834609	0.048373	-0.0648092	0.12556	0.0840647	0.0467664	0.0145498	0.731177	-0.181007	1.63643e-05	0.363853	<1E-15	0.0157694	0.709624	-0.044731	0.290652	-0.167918	6.51948e-05	-0.265064	1.85514e-10	-0.317062	1.5099e-14	0.710065	<1E-15	-0.0674339	0.11093	-0.118118	0.00513009	0.272781	5.1803e-11	-0.327238	1.77636e-15
10	LDL_TG	0.0365631	0.38781	0.00293503	0.944751	0.404201	<1E-15	0.423406	<1E-15	0.058902	0.163932	0.0895672	0.0340844	0.186666	8.72414e-06	0.230598	3.40356e-08	0.285167	6.13465e-12	0.220103	1.428e-07	0.270121	8.07803e-11	0.447309	<1E-15	0.0627839	0.13784	0.41868	<1E-15	0.260345	3.96738e-10	0.276032	2.98939e-11	0.153529	0.000265646	0.119101	0.00476962	0.165721	8.14135e-05	0.411398	<1E-15	0.263232	2.49648e-10	0.290759	2.26041e-12	0.169371	5.61955e-05	0.166715	7.36591e-05
11	HDL_TG	-0.0290773	0.492271	-0.0379189	0.370444	0.277285	2.41398e-11	0.415022	<1E-15	0.064103	0.129741	-0.12532	0.00297119	0.0497718	0.23963	0.129178	0.00219195	0.0973485	0.0212219	0.0407883	0.335311	0.248966	2.33279e-09	0.219384	1.57137e-07	0.0857966	0.042405	0.52599	<1E-15	0.253996	1.07745e-09	0.234249	2.0328e-08	0.158453	0.000166478	0.0337823	0.424942	0.0483942	0.252903	0.649374	<1E-15	0.186897	8.49973e-06	0.170288	5.11375e-05	0.438521	<1E-15	0.0394847	0.350999
12	Total_PL	-0.0578002	0.171974	0.0425856	0.314433	0.427877	<1E-15	0.466507	<1E-15	0.313433	3.13083e-14	0.107133	0.0111847	0.194064	3.72485e-06	0.485841	<1E-15	0.37353	<1E-15	0.291733	1.89493e-12	0.541405	<1E-15	0.594729	<1E-15	0.081527	0.0538326	0.67929	<1E-15	0.509597	<1E-15	0.588299	<1E-15	0.281766	1.11389e-11	0.145545	0.000550402	0.28138	1.19118e-11	0.302224	2.72227e-13	0.41201	<1E-15	0.43929	<1E-15	0.372008	<1E-15	0.206481	8.28491e-07
13	VLDL_PL	-0.13186	0.00176563	-0.160289	0.000139353	0.241096	7.55584e-09	0.522588	<1E-15	-0.0670487	0.112989	-0.121528	0.00397517	0.0387313	0.360273	0.0409231	0.333715	0.00870292	0.837187	0.0566296	0.180837	0.191958	4.76168e-06	0.195405	3.18082e-06	-0.0777395	0.0660146	0.413024	<1E-15	0.0881295	0.0370763	0.0449961	0.287799	-0.0106771	0.800957	-0.094329	0.0256002	-0.128051	0.00239758	0.671011	<1E-15	0.00964077	0.819928	-0.0150766	0.721839	0.247533	2.89825e-09	-0.154938	0.000232729
14	LDL_PL	-0.00327299	0.938401	0.062409	0.140211	0.430953	<1E-15	0.407131	<1E-15	0.191279	5.15131e-06	0.22815	4.78545e-08	0.210257	5.14833e-07	0.379415	<1E-15	0.39404	<1E-15	0.347114	<1E-15	0.403291	<1E-15	0.563481	<1E-15	0.0432859	0.306534	0.435308	<1E-15	0.34806	<1E-15	0.407638	<1E-15	0.233108	2.39032e-08	0.203249	1.23635e-06	0.303925	1.97176e-13	0.141962	0.000754404	0.389607	<1E-15	0.387195	<1E-15	0.101499	0.0162724	0.229557	3.93591e-08
15	HDL_PL	-0.0507603	0.230413	0.0746582	0.0775215	0.239562	9.45682e-09	0.181958	1.47426e-05	0.411031	<1E-15	0.0889233	0.035398	0.135159	0.00134587	0.46883	<1E-15	0.312018	4.13003e-14	0.186793	8.60015e-06	0.445484	<1E-15	0.420248	<1E-15	0.115439	0.00624122	0.521713	<1E-15	0.499483	<1E-15	0.59407	<1E-15	0.268609	1.03768e-10	0.117038	0.0055546	0.279106	1.76601e-11	0.0322325	0.446505	0.36699	<1E-15	0.415914	<1E-15	0.379694	<1E-15	0.215777	2.52734e-07
16	Total_CE	0.0206281	0.626179	0.122834	0.00359894	0.429305	<1E-15	0.412865	<1E-15	0.314116	2.75335e-14	0.199755	1.89234e-06	0.225174	7.20449e-08	0.496111	<1E-15	0.421473	<1E-15	0.361809	<1E-15	0.515983	<1E-15	0.634348	<1E-15	0.110984	0.00857326	0.554693	<1E-15	0.471036	<1E-15	0.563035	<1E-15	0.325827	2.66454e-15	0.247433	2.94262e-09	0.387627	<1E-15	0.131283	0.00185022	0.437648	<1E-15	0.459812	<1E-15	0.23496	1.83679e-08	0.298202	5.78204e-13
17	VLDL_CE	0.00895138	0.832607	0.0049853	0.906297	0.339489	<1E-15	0.503657	<1E-15	0.024601	0.561272	0.0104636	0.804856	0.130246	0.00201188	0.155572	0.00021919	0.135319	0.00132799	0.184354	1.1307e-05	0.287364	4.1549e-12	0.367977	<1E-15	0.0397555	0.347702	0.412385	<1E-15	0.175489	2.96677e-05	0.168154	6.36481e-05	0.166516	7.51527e-05	0.110815	0.00867532	0.112877	0.00750083	0.488685	<1E-15	0.133177	0.00158543	0.13567	0.00128975	0.198445	2.21523e-06	0.0758736	0.0728018
18	LDL_CE	-0.0103901	0.8062	0.057683	0.172846	0.419291	<1E-15	0.437205	<1E-15	0.198427	2.22012e-06	0.192712	4.36246e-06	0.189717	6.16592e-06	0.375741	<1E-15	0.374349	<1E-15	0.332263	6.66134e-16	0.421266	<1E-15	0.54719	<1E-15	0.0444899	0.293262	0.472454	<1E-15	0.354133	<1E-15	0.412945	<1E-15	0.236253	1.52649e-08	0.1877	7.76081e-06	0.28745	4.09184e-12	0.206355	8.41644e-07	0.381058	<1E-15	0.372097	<1E-15	0.149705	0.000378278	0.207419	7.36818e-07
19	HDL_CE	0.0234773	0.579299	0.171728	4.40537e-05	0.157521	0.000182062	0.0744509	0.0783509	0.443163	<1E-15	0.142548	0.000716811	0.160515	0.000136319	0.483497	<1E-15	0.312781	3.55271e-14	0.214696	2.90941e-07	0.397	<1E-15	0.408898	<1E-15	0.160339	0.000138675	0.360884	<1E-15	0.449994	<1E-15	0.569675	<1E-15	0.286258	5.05773e-12	0.186183	9.21251e-06	0.359654	<1E-15	-0.184337	1.13282e-05	0.32301	4.44089e-15	0.392326	<1E-15	0.251003	1.70973e-09	0.283326	8.48077e-12
20	Total_FC	0.00791589	0.851732	0.0862678	0.0412793	0.441405	<1E-15	0.470892	<1E-15	0.252195	1.42365e-09	0.177861	2.30225e-05	0.222147	1.08589e-07	0.443488	<1E-15	0.383292	<1E-15	0.345967	<1E-15	0.49196	<1E-15	0.617021	<1E-15	0.0806953	0.0563337	0.555312	<1E-15	0.430364	<1E-15	0.496216	<1E-15	0.28189	1.09002e-11	0.2141	3.14355e-07	0.325211	2.88658e-15	0.244187	4.78586e-09	0.388031	<1E-15	0.408001	<1E-15	0.221475	1.18852e-07	0.248178	2.62915e-09
21	VLDL_FC	-0.117757	0.00526878	-0.132288	0.00170501	0.259616	4.45578e-10	0.528353	<1E-15	-0.0445369	0.292752	-0.0970115	0.0216759	0.0505311	0.232527	0.0688075	0.103828	0.0333178	0.431341	0.0833646	0.0486334	0.222594	1.02248e-07	0.231543	2.98083e-08	-0.06314	0.135616	0.421541	<1E-15	0.108083	0.0104825	0.0732791	0.0831747	0.0159207	0.706966	-0.0629077	0.137064	-0.088016	0.0373217	0.634209	<1E-15	0.0301423	0.476549	0.0101813	0.81002	0.23434	2.00673e-08	-0.121037	0.00412545
22	LDL_FC	0.0315731	0.455866	0.113516	0.00716717	0.409109	<1E-15	0.348597	<1E-15	0.235793	1.63064e-08	0.261614	3.23869e-10	0.217612	1.98656e-07	0.419387	<1E-15	0.416373	<1E-15	0.371476	<1E-15	0.424076	<1E-15	0.575472	<1E-15	0.073022	0.0842647	0.407682	<1E-15	0.379263	<1E-15	0.454701	<1E-15	0.273084	4.92302e-11	0.252787	1.29937e-09	0.370081	<1E-15	0.0339679	0.422401	0.41675	<1E-15	0.419734	<1E-15	0.0872101	0.0391043	0.286461	4.87876e-12
23	HDL_FC	0.00611755	0.885149	0.13966	0.000920312	0.282	1.06928e-11	0.175751	2.88526e-05	0.429936	<1E-15	0.194371	3.59293e-06	0.203603	1.18367e-06	0.538673	<1E-15	0.400998	<1E-15	0.271995	5.90992e-11	0.475022	<1E-15	0.528456	<1E-15	0.142499	0.000719896	0.482744	<1E-15	0.531129	<1E-15	0.640479	<1E-15	0.305021	1.60094e-13	0.20144	1.54253e-06	0.375833	<1E-15	-0.0491209	0.245839	0.410139	<1E-15	0.482662	<1E-15	0.299367	4.65405e-13	0.314391	2.57572e-14
24	Total_L	-0.0721704	0.0879571	0.00780143	0.853852	0.431704	<1E-15	0.534166	<1E-15	0.231898	2.83566e-08	0.0938175	0.0264143	0.178465	2.15725e-05	0.414474	<1E-15	0.335227	4.44089e-16	0.278273	2.03806e-11	0.497861	<1E-15	0.555327	<1E-15	0.0414063	0.328034	0.649568	<1E-15	0.432843	<1E-15	0.48485	<1E-15	0.224774	7.60772e-08	0.113532	0.00715899	0.214298	3.06364e-07	0.411489	<1E-15	0.352848	<1E-15	0.363289	<1E-15	0.334526	4.44089e-16	0.143195	0.00067738
25	VLDL_L	-0.185092	1.04121e-05	-0.209494	5.67183e-07	0.198132	2.29985e-06	0.504826	<1E-15	-0.0796123	0.0597341	-0.155998	0.00021052	-0.00158692	0.970111	0.0184541	0.663007	-0.0196157	0.643221	0.0145036	0.731998	0.160431	0.000137435	0.133147	0.00158925	-0.120139	0.00441379	0.411452	<1E-15	0.069959	0.0981558	0.0195065	0.645071	-0.0699643	0.0981305	-0.160578	0.000135481	-0.199695	1.90606e-06	0.702492	<1E-15	-0.0112193	0.791077	-0.0493351	0.243783	0.267364	1.27373e-10	-0.223935	8.52785e-08
26	LDL_L	0.002351	0.955732	0.0700307	0.0978111	0.43348	<1E-15	0.424952	<1E-15	0.202244	1.39846e-06	0.215629	2.57679e-07	0.205638	9.20279e-07	0.387508	<1E-15	0.394955	<1E-15	0.345902	<1E-15	0.42031	<1E-15	0.567764	<1E-15	0.0535651	0.205635	0.462111	<1E-15	0.362893	<1E-15	0.423369	<1E-15	0.24512	4.16445e-09	0.205367	9.51785e-07	0.308264	8.57092e-14	0.178463	2.1577e-05	0.396055	<1E-15	0.392804	<1E-15	0.133501	0.00154375	0.232299	2.67974e-08
27	HDL_L	-0.0172785	0.683272	0.116951	0.00559038	0.229478	3.97946e-08	0.164314	9.37305e-05	0.43051	<1E-15	0.11196	0.0080044	0.151518	0.00032023	0.489895	<1E-15	0.326242	2.22045e-15	0.205967	8.83349e-07	0.446533	<1E-15	0.439402	<1E-15	0.141638	0.000775942	0.488471	<1E-15	0.497851	<1E-15	0.603716	<1E-15	0.288938	3.13616e-12	0.153992	0.000254369	0.323302	4.44089e-15	-0.0182186	0.667047	0.365501	<1E-15	0.423247	<1E-15	0.3479	<1E-15	0.253177	1.22333e-09
28	Total_P	-0.0214204	0.612979	0.122617	0.00365934	0.29631	8.20677e-13	0.264172	2.14423e-10	0.41213	<1E-15	0.0944176	0.0254615	0.138312	0.00103247	0.489618	<1E-15	0.349624	<1E-15	0.236262	1.52446e-08	0.481859	<1E-15	0.488399	<1E-15	0.144391	0.000609705	0.551813	<1E-15	0.491568	<1E-15	0.61517	<1E-15	0.315365	2.13163e-14	0.177314	2.44168e-05	0.35591	<1E-15	0.0318402	0.452061	0.41346	<1E-15	0.44311	<1E-15	0.33041	8.88178e-16	0.252796	1.2975e-09
29	VLDL_P	-0.0921693	0.0291913	-0.111391	0.00833179	0.308375	8.39329e-14	0.5348	<1E-15	-0.0270932	0.522285	-0.0517625	0.221327	0.082469	0.0511122	0.106171	0.0119384	0.0958469	0.0233104	0.1273	0.00254427	0.247735	2.81119e-09	0.296285	8.24452e-13	-0.0547005	0.196175	0.445706	<1E-15	0.15718	0.0001881	0.131207	0.00186175	0.0435648	0.303425	-0.0268477	0.526062	-0.035258	0.404985	0.613141	<1E-15	0.0924232	0.0287477	0.0856571	0.0427431	0.223311	9.27986e-08	-0.0606157	0.151989
30	LDL_P	0.0152788	0.718267	0.0497072	0.240241	0.383586	<1E-15	0.45374	<1E-15	0.108224	0.0103815	0.154325	0.000246556	0.1911	5.25886e-06	0.282153	1.04123e-11	0.284934	6.39222e-12	0.292858	1.54499e-12	0.348511	<1E-15	0.491358	<1E-15	0.0383321	0.365249	0.390104	<1E-15	0.253577	1.14991e-09	0.281608	1.14477e-11	0.198176	2.28793e-06	0.170297	5.10881e-05	0.223934	8.52919e-08	0.277103	2.4905e-11	0.25841	5.39458e-10	0.261568	3.2628e-10	0.103452	0.014316	0.163854	9.81209e-05
31	HDL_P	-0.0246387	0.560672	0.120879	0.00417488	0.25207	1.45112e-09	0.212972	3.63663e-07	0.415885	<1E-15	0.0805295	0.0568437	0.120094	0.00442858	0.469462	<1E-15	0.324832	3.10862e-15	0.206219	8.5607e-07	0.450373	<1E-15	0.437322	<1E-15	0.143818	0.000641336	0.514452	<1E-15	0.474624	<1E-15	0.597244	<1E-15	0.298868	5.10703e-13	0.159859	0.000145311	0.338427	2.22045e-16	-0.00593606	0.888533	0.39343	<1E-15	0.424189	<1E-15	0.326292	2.22045e-15	0.240519	8.22263e-09
32	VLDL_size	-0.285886	5.40168e-12	-0.30654	1.19682e-13	-0.0467485	0.269419	0.31289	3.4861e-14	-0.168393	6.21135e-05	-0.281724	1.12204e-11	-0.144871	0.000584338	-0.153633	0.00026307	-0.216194	2.39329e-07	-0.168488	6.15112e-05	-0.0285791	0.499719	-0.168882	5.90846e-05	-0.2154	2.65466e-07	0.21867	1.72754e-07	-0.123403	0.0034456	-0.187869	7.61368e-06	-0.264338	2.08743e-10	-0.35724	<1E-15	-0.430145	<1E-15	0.61936	<1E-15	-0.201815	1.47366e-06	-0.271573	6.34182e-11	0.209428	5.71936e-07	-0.444491	<1E-15
33	LDL_size	0.114796	0.00653797	0.107305	0.0110549	0.094011	0.0261038	0.0734102	0.0826234	0.0695347	0.100217	0.100193	0.0177083	0.125902	0.00283927	0.0919475	0.0295834	0.0947323	0.0249737	0.156633	0.000198181	0.0675599	0.110263	0.22026	1.3984e-07	0.020122	0.634674	0.0674819	0.110675	0.138341	0.00102988	0.133702	0.00151837	0.143104	0.000682791	0.14987	0.000372592	0.154753	0.000236819	-0.0536041	0.205305	0.0465904	0.271043	0.0918073	0.0298337	-0.0231126	0.585207	0.158654	0.000163283
34	HDL_size	0.0872032	0.0391199	0.172913	3.89261e-05	0.107024	0.011268	0.0144462	0.733019	0.337605	2.22045e-16	0.155063	0.000229997	0.175424	2.98729e-05	0.401153	<1E-15	0.247616	2.86242e-09	0.181638	1.52694e-05	0.302942	2.37588e-13	0.335045	4.44089e-16	0.168038	6.44052e-05	0.23873	1.06728e-08	0.378467	<1E-15	0.438351	<1E-15	0.244852	4.33406e-09	0.200908	1.64573e-06	0.301461	3.14193e-13	-0.101592	0.016174	0.190676	5.52282e-06	0.290486	2.3741e-12	0.219985	1.45058e-07	0.285358	5.93037e-12
35	Phosphoglyc	-0.0630527	0.136864	0.0390056	0.357742	0.384113	<1E-15	0.441799	<1E-15	0.307668	1.06581e-13	0.0420404	0.321543	0.15251	0.000299545	0.445932	<1E-15	0.321169	7.54952e-15	0.230923	3.44073e-08	0.516817	<1E-15	0.533561	<1E-15	0.0906766	0.0322277	0.677641	<1E-15	0.481653	<1E-15	0.56332	<1E-15	0.285956	5.82023e-12	0.120473	0.00437447	0.252288	1.50118e-09	0.334826	4.44089e-16	0.372001	<1E-15	0.405591	<1E-15	0.427737	<1E-15	0.182197	1.48773e-05
36	TG_by_PG	-0.207205	7.92121e-07	-0.285999	5.77716e-12	-0.00791183	0.85207	0.295313	1.08225e-12	-0.254582	1.05363e-09	-0.235276	1.86173e-08	-0.120985	0.00420953	-0.22569	7.08601e-08	-0.200171	1.87779e-06	-0.150555	0.000358615	-0.107874	0.0107744	-0.1712	4.80175e-05	-0.202829	1.35998e-06	0.13546	0.00133917	-0.168943	6.05437e-05	-0.259286	5.0423e-10	-0.27344	5.02003e-11	-0.303161	2.51354e-13	-0.41291	<1E-15	0.648463	<1E-15	-0.207937	7.22746e-07	-0.268101	1.21785e-10	0.117161	0.00558974	-0.391678	<1E-15
37	Cholines	-0.0279331	0.510227	0.0811461	0.0554036	0.381232	<1E-15	0.438365	<1E-15	0.33071	8.88178e-16	0.0636841	0.132968	0.176341	2.80115e-05	0.467263	<1E-15	0.331648	8.88178e-16	0.255711	8.83998e-10	0.529421	<1E-15	0.561599	<1E-15	0.116766	0.00575317	0.655648	<1E-15	0.48952	<1E-15	0.572696	<1E-15	0.3157	2.22045e-14	0.160825	0.000135988	0.294637	1.22435e-12	0.289752	2.96341e-12	0.374068	<1E-15	0.41133	<1E-15	0.407079	<1E-15	0.21683	2.31444e-07
38	Phosphatidylc	-0.0986934	0.0197109	0.00923256	0.827735	0.359616	<1E-15	0.454498	<1E-15	0.292507	1.80411e-12	0.0195477	0.644967	0.134568	0.00144187	0.439791	<1E-15	0.293859	1.41109e-12	0.210081	5.51713e-07	0.52634	<1E-15	0.515934	<1E-15	0.063974	0.131208	0.685463	<1E-15	0.463413	<1E-15	0.547312	<1E-15	0.245977	3.90538e-09	0.0664888	0.116691	0.198309	2.3479e-06	0.356975	<1E-15	0.330794	8.88178e-16	0.367455	<1E-15	0.423798	<1E-15	0.125231	0.00304412
39	Sphingomyelins	0.0798979	0.0592768	0.170664	5.075e-05	0.416669	<1E-15	0.294987	1.14841e-12	0.32641	2.66454e-15	0.263481	2.58111e-10	0.266454	1.59442e-10	0.513074	<1E-15	0.471714	<1E-15	0.373545	<1E-15	0.45713	<1E-15	0.634478	<1E-15	0.132672	0.00168464	0.464398	<1E-15	0.483086	<1E-15	0.577173	<1E-15	0.332218	8.88178e-16	0.305958	1.47882e-13	0.446644	<1E-15	0.0112281	0.791284	0.453655	<1E-15	0.511864	<1E-15	0.16166	0.000125347	0.390251	<1E-15
40	ApoB	-0.00225363	0.957563	0.0277603	0.51209	0.400096	<1E-15	0.468461	<1E-15	0.097448	0.0210894	0.145125	0.000571336	0.189298	6.46943e-06	0.280273	1.44347e-11	0.284059	7.45737e-12	0.287592	3.98925e-12	0.352638	<1E-15	0.494171	<1E-15	0.0260275	0.538785	0.417563	<1E-15	0.262467	2.82389e-10	0.286213	5.09814e-12	0.192807	4.31429e-06	0.15578	0.000214912	0.207982	6.8644e-07	0.308228	8.65974e-14	0.261885	3.10072e-10	0.267174	1.31418e-10	0.124327	0.00320902	0.154062	0.000252723
41	ApoA1	-0.0167588	0.692307	0.122676	0.00364264	0.235154	1.78661e-08	0.176362	2.70356e-05	0.426362	<1E-15	0.0886473	0.0359741	0.132425	0.00168609	0.475646	<1E-15	0.319869	8.65974e-15	0.192381	4.53325e-06	0.442065	<1E-15	0.424018	<1E-15	0.153236	0.000273015	0.502687	<1E-15	0.486523	<1E-15	0.601161	<1E-15	0.298081	5.91083e-13	0.156168	0.000207152	0.330797	8.88178e-16	-0.00373047	0.929811	0.376712	<1E-15	0.42257	<1E-15	0.356792	<1E-15	0.25076	1.77464e-09
42	ApoB_by_ApoA1	0.00413403	0.922241	-0.0603515	0.153785	0.208722	6.25326e-07	0.298407	5.56444e-13	-0.162876	0.000108117	0.0715831	0.0905788	0.0947152	0.025	-0.0316944	0.454135	0.058249	0.168663	0.136125	0.00124163	0.0494587	0.242603	0.177052	2.5113e-05	-0.0639303	0.13078	0.0690923	0.102402	-0.0583197	0.168146	-0.103722	0.0140627	-0.00663031	0.875597	0.0407394	0.335892	-0.014291	0.735779	0.280324	1.43081e-11	0.00235578	0.955642	-0.0157725	0.70957	-0.100923	0.016892	-0.0234589	0.579596
43	Total_FA	-0.0839564	0.0474486	-0.0559084	0.187256	0.33592	4.44089e-16	0.53775	<1E-15	0.125664	0.00294361	-0.0562544	0.184537	0.122686	0.00370109	0.249921	2.15527e-09	0.180812	1.7309e-05	0.140469	0.000877107	0.368129	<1E-15	0.380521	<1E-15	0.0309852	0.465105	0.596633	<1E-15	0.297987	6.61249e-13	0.306288	1.39e-13	0.157345	0.000190153	0.0224066	0.597382	0.0635953	0.133511	0.602389	<1E-15	0.18831	7.51954e-06	0.199816	1.95978e-06	0.412207	<1E-15	0.0245354	0.563019
44	Unsaturation	0.0415554	0.327163	0.118473	0.00507598	0.126903	0.00267219	-0.0349523	0.409914	0.169378	5.79098e-05	0.203592	1.23862e-06	-0.0234816	0.579911	0.192506	4.64756e-06	0.243174	5.92141e-09	0.220104	1.50302e-07	0.250221	2.05934e-09	0.326279	2.66454e-15	-0.0534559	0.207378	0.14568	0.000556515	0.222255	1.12771e-07	0.369144	<1E-15	0.154739	0.000243334	0.172123	4.36404e-05	0.292458	1.81988e-12	-0.359195	<1E-15	0.250635	1.93339e-09	0.37597	<1E-15	-0.173089	3.94609e-05	0.269826	9.16558e-11
45	Omega_3	-0.13466	0.00143093	-0.0658613	0.12019	0.395015	<1E-15	0.163419	0.000105439	0.148666	0.000425868	0.229475	4.20947e-08	-0.037501	0.376602	0.323363	4.88498e-15	0.449519	<1E-15	0.244966	4.54108e-09	0.354417	<1E-15	0.441763	<1E-15	-0.120652	0.00431597	0.520691	<1E-15	0.392754	<1E-15	0.538234	<1E-15	0.0908335	0.0319292	0.0918509	0.0300504	0.2344	2.10873e-08	0.0692613	0.102178	0.471398	<1E-15	0.573353	<1E-15	0.013111	0.7573	0.230141	3.83732e-08
46	Omega_6	-0.00429036	0.919455	0.0315983	0.456316	0.251717	1.63871e-09	0.577539	<1E-15	0.180406	1.80924e-05	-0.0799814	0.0590111	0.164806	9.18816e-05	0.261601	3.48956e-10	0.0967642	0.0222539	0.174564	3.3805e-05	0.413744	<1E-15	0.418785	<1E-15	0.0890487	0.0354681	0.543585	<1E-15	0.275184	3.74247e-11	0.279976	1.6517e-11	0.224869	7.9235e-08	0.0710646	0.0935334	0.103078	0.0148533	0.52116	<1E-15	0.0802267	0.0582355	0.112561	0.00778107	0.390849	<1E-15	0.0311394	0.462886
47	PUFA	-0.0305241	0.471776	0.0188081	0.657527	0.301862	3.21076e-13	0.549242	<1E-15	0.191288	5.35048e-06	-0.0244495	0.564388	0.139932	0.000918487	0.298411	6.11511e-13	0.177756	2.40837e-05	0.203963	1.1835e-06	0.443867	<1E-15	0.4675	<1E-15	0.0565082	0.182562	0.590471	<1E-15	0.326847	2.22045e-15	0.362583	<1E-15	0.219325	1.66665e-07	0.0835543	0.0485245	0.142307	0.000748375	0.473997	<1E-15	0.167081	7.31337e-05	0.219064	1.72508e-07	0.347285	<1E-15	0.0755317	0.0746258
48	MUFA	-0.0704342	0.0964865	-0.0983699	0.0201188	0.194432	3.71344e-06	0.502038	<1E-15	-0.00139425	0.973785	-0.190274	6.01108e-06	0.0775719	0.0670922	0.0723572	0.0877053	-0.0063647	0.880756	0.012927	0.760602	0.197907	2.46326e-06	0.177627	2.44191e-05	0.0339451	0.423547	0.453385	<1E-15	0.114611	0.0067243	0.0655787	0.121792	0.0839589	0.0474419	-0.0592275	0.162365	-0.0895269	0.0344887	0.713903	<1E-15	-0.0171156	0.686633	-0.0279005	0.510721	0.429077	<1E-15	-0.107401	0.0111266
49	SFA	-0.120369	0.00440851	-0.0696574	0.100227	0.426859	<1E-15	0.47561	<1E-15	0.167812	6.79215e-05	0.0390443	0.357266	0.131046	0.00192209	0.325294	3.10862e-15	0.316591	1.86517e-14	0.183996	1.2198e-05	0.38802	<1E-15	0.431107	<1E-15	0.0110741	0.794081	0.632556	<1E-15	0.38644	<1E-15	0.425415	<1E-15	0.149744	0.000386165	0.045159	0.286922	0.128383	0.00237798	0.515653	<1E-15	0.357614	<1E-15	0.353287	<1E-15	0.385151	<1E-15	0.0989771	0.0193592
50	LA	0.0382118	0.367617	0.0459201	0.278869	0.144355	0.000625638	0.574538	<1E-15	0.138175	0.00106651	-0.154699	0.00024424	0.168223	6.51468e-05	0.175934	2.92483e-05	-0.0299654	0.47993	0.11914	0.00483154	0.348852	<1E-15	0.317699	1.5099e-14	0.124455	0.0032322	0.437542	<1E-15	0.17322	3.89232e-05	0.134079	0.00150117	0.20857	6.67554e-07	0.0495574	0.242509	0.0348721	0.41099	0.559203	<1E-15	-0.0658708	0.120137	-0.0469107	0.268618	0.387404	<1E-15	-0.0368966	0.384347
51	DHA	-0.145998	0.000540984	-0.0386872	0.361683	0.32485	3.55271e-15	0.0341611	0.4206	0.175057	3.2093e-05	0.290526	2.57905e-12	-0.0429146	0.311575	0.354964	<1E-15	0.45605	<1E-15	0.235869	1.71085e-08	0.32504	3.55271e-15	0.417396	<1E-15	-0.143665	0.000664775	0.372172	<1E-15	0.346526	<1E-15	0.532794	<1E-15	0.0528972	0.212174	0.0656904	0.121157	0.23252	2.75074e-08	-0.199255	2.09645e-06	0.424525	<1E-15	0.557121	<1E-15	-0.113207	0.00743295	0.239186	1.06138e-08
52	Omega_3_pct	-0.105359	0.0127693	-0.0377261	0.373743	0.286312	5.46607e-12	-0.106235	0.0120403	0.0992235	0.0190581	0.305517	1.6076e-13	-0.107524	0.0110339	0.238645	1.14777e-08	0.440061	<1E-15	0.208344	6.86815e-07	0.210601	5.16514e-07	0.305676	1.56097e-13	-0.163576	0.000103816	0.284471	7.55973e-12	0.290197	2.73603e-12	0.456225	<1E-15	0.0282125	0.506003	0.0988188	0.0195547	0.240193	9.16809e-09	-0.257528	6.65306e-10	0.445605	<1E-15	0.561092	<1E-15	-0.212939	3.83205e-07	0.26141	3.59788e-10
53	Omega_6_pct	0.172058	4.39347e-05	0.198393	2.32425e-06	-0.315094	2.5091e-14	-0.185094	1.07963e-05	0.0308267	0.467392	-0.0135948	0.748642	0.0261246	0.538001	-0.11635	0.00593025	-0.254316	1.09799e-09	-0.026767	0.528049	-0.074842	0.0773231	-0.129244	0.00222071	0.0986368	0.0197818	-0.401043	<1E-15	-0.183026	1.35792e-05	-0.212349	4.13309e-07	0.0363236	0.391779	0.0777967	0.0663019	0.0341769	0.420386	-0.446111	<1E-15	-0.283427	9.07541e-12	-0.260047	4.46981e-10	-0.247314	3.19648e-09	0.00207243	0.961043
54	PUFA_pct	0.127026	0.0026465	0.173991	3.59061e-05	-0.209215	6.15545e-07	-0.244373	4.95922e-09	0.0660853	0.118932	0.100522	0.0175382	-0.0361833	0.393612	-0.0264801	0.532483	-0.0879993	0.0377008	0.0415576	0.327137	-0.00367068	0.931057	-0.0202626	0.632921	0.0292001	0.491222	-0.299792	4.72955e-13	-0.0803806	0.0577534	-0.0291519	0.491938	0.0459952	0.278082	0.108991	0.00998077	0.134349	0.0014681	-0.553156	<1E-15	-0.100582	0.01747	-0.035482	0.402851	-0.330144	1.33227e-15	0.098559	0.0198795
55	MUFA_pct	-0.00681599	0.87237	-0.114996	0.00654068	-0.0975594	0.0211731	0.290203	2.73292e-12	-0.200812	1.73784e-06	-0.348327	<1E-15	-0.0239723	0.572015	-0.245658	4.09575e-09	-0.317521	1.55431e-14	-0.211273	4.74217e-07	-0.14051	0.000874064	-0.204332	1.13106e-06	0.0406855	0.337399	0.0762209	0.0720072	-0.225556	7.21597e-08	-0.357082	<1E-15	-0.0588747	0.164886	-0.163285	0.000106837	-0.306061	1.44995e-13	0.675074	<1E-15	-0.355566	<1E-15	-0.399701	<1E-15	0.319665	1.02141e-14	-0.278615	2.08682e-11
56	SFA_pct	-0.189882	6.28705e-06	-0.100565	0.0174894	0.451611	<1E-15	-0.0279958	0.509276	0.184545	1.14775e-05	0.340947	<1E-15	0.0758268	0.0734954	0.383421	<1E-15	0.560101	<1E-15	0.22385	9.0969e-08	0.211625	4.53402e-07	0.316018	2.08722e-14	-0.0925813	0.0287607	0.344754	<1E-15	0.428186	<1E-15	0.533683	<1E-15	0.0105281	0.804022	0.0651791	0.124087	0.227819	5.29246e-08	-0.0868413	0.0403017	0.657421	<1E-15	0.604168	<1E-15	0.0405207	0.339362	0.236301	1.60825e-08
57	LA_pct	0.209618	5.85011e-07	0.196369	2.95675e-06	-0.333403	4.44089e-16	0.0960839	0.0232161	0.0330553	0.435807	-0.213518	3.55709e-07	0.0961705	0.0230916	-0.150849	0.000349084	-0.39319	<1E-15	-0.0545987	0.197816	-0.0237954	0.574856	-0.117995	0.00525811	0.179494	1.99735e-05	-0.271219	7.27487e-11	-0.220508	1.42444e-07	-0.30853	9.01501e-14	0.0857481	0.0428949	0.0468356	0.269386	-0.0512497	0.226778	-0.0481337	0.256323	-0.447881	<1E-15	-0.439697	<1E-15	-0.0380918	0.369125	-0.111586	0.00833413
58	DHA_pct	-0.0943471	0.0258375	-0.00463895	0.912936	0.117242	0.0055568	-0.300887	3.85469e-13	0.095752	0.0236984	0.324006	4.21885e-15	-0.114003	0.00702319	0.203147	1.30799e-06	0.336836	4.44089e-16	0.140844	0.000849305	0.100098	0.0180224	0.171788	4.51832e-05	-0.158281	0.000173872	0.00521636	0.90215	0.156983	0.000196834	0.327504	1.9984e-15	-0.047086	0.266831	0.0418601	0.323625	0.182317	1.4682e-05	-0.565343	<1E-15	0.301294	3.5727e-13	0.418558	<1E-15	-0.366886	<1E-15	0.201583	1.58279e-06
59	PUFA_by_MUFA	0.0578037	0.172719	0.144187	0.000634968	-0.0296869	0.484024	-0.293481	1.51168e-12	0.152789	0.000291891	0.265214	1.95078e-10	-0.000975006	0.981666	0.141633	0.000793386	0.163524	0.000104343	0.149543	0.00039331	0.0870549	0.0398108	0.116581	0.00583156	-0.0156798	0.711696	-0.182737	1.40196e-05	0.101192	0.0167963	0.208874	6.42555e-07	0.0561509	0.185347	0.147813	0.000459924	0.249046	2.46148e-09	-0.66607	<1E-15	0.177375	2.50867e-05	0.235142	1.89768e-08	-0.341828	<1E-15	0.21766	2.07579e-07
60	Omega_6_by_Omega_3	0.14591	0.000545227	0.0873451	0.0391521	-0.34725	<1E-15	0.0517466	0.2223	-0.0830642	0.0498632	-0.29605	9.45466e-13	0.105747	0.0124411	-0.253729	1.20233e-09	-0.467677	<1E-15	-0.200263	1.85701e-06	-0.216273	2.48897e-07	-0.317009	1.73195e-14	0.173794	3.6654e-05	-0.361083	<1E-15	-0.318641	1.24345e-14	-0.473027	<1E-15	-0.0129457	0.760267	-0.0737052	0.0819417	-0.212387	4.11344e-07	0.125639	0.00294929	-0.491739	<1E-15	-0.58598	<1E-15	0.136253	0.0012535	-0.239846	9.6434e-09
61	Ala	0.467903	<1E-15	0.469928	<1E-15	-0.0409737	0.333551	-0.023022	0.587014	0.0758889	0.073001	-0.105706	0.0123972	0.00140928	0.973479	0.0397921	0.347691	-0.0693534	0.101414	-0.0510892	0.227819	0.023361	0.581519	-0.0516126	0.223085	0.455402	<1E-15	-0.0382184	0.367104	-0.0302499	0.475372	0.00952965	0.822126	0.47875	<1E-15	0.477709	<1E-15	0.467757	<1E-15	0.129581	0.00214202	0.0418891	0.322855	0.0391863	0.355085	0.229232	4.23412e-08	0.419895	<1E-15
62	Gln	-0.323236	4.88498e-15	-0.278066	2.29257e-11	0.344743	<1E-15	-0.0354809	0.402866	-0.0398268	0.347704	0.260564	4.11732e-10	-0.00232744	0.956254	0.210321	5.35178e-07	0.326279	2.66454e-15	0.126138	0.00283688	0.0723161	0.087886	0.149783	0.000384795	-0.284238	7.87415e-12	0.249139	2.42696e-09	0.283003	9.77307e-12	0.260989	3.84802e-10	-0.0688809	0.10408	-0.133153	0.00161968	-0.0664361	0.116982	-0.0622283	0.142081	0.393561	<1E-15	0.354574	<1E-15	0.172799	4.06722e-05	-0.0337493	0.426227
63	Gly	0.499023	<1E-15	0.458554	<1E-15	-0.140765	0.000836873	0.031806	0.452548	0.0228	0.590294	-0.104731	0.0131504	0.0622326	0.141338	-0.0394128	0.351876	-0.13059	0.00195696	-0.0422167	0.318647	-0.0350871	0.407267	-0.0607613	0.151006	0.44848	<1E-15	-0.139834	0.000906664	-0.131585	0.00180544	-0.147969	0.000442894	0.423528	<1E-15	0.437015	<1E-15	0.356444	<1E-15	0.103352	0.0144109	-0.155152	0.000228064	-0.144583	0.000599469	0.151882	0.00030965	0.351208	<1E-15
64	His	0.366261	<1E-15	0.378031	<1E-15	-0.0584504	0.167193	0.031516	0.456681	0.0672954	0.111667	-0.117316	0.00544255	0.0559618	0.186044	-0.00983148	0.816428	-0.154856	0.000234531	0.0270634	0.522742	-0.00996541	0.813973	-0.016754	0.692389	0.374469	<1E-15	-0.0606461	0.151783	-0.0151122	0.721211	-0.0196726	0.642258	0.377815	<1E-15	0.397185	<1E-15	0.393867	<1E-15	0.0848146	0.0448336	-0.0182633	0.66628	-0.0210573	0.619015	0.152385	0.000295518	0.296846	7.43183e-13
65	Total_BCAA	0.283836	7.75424e-12	0.265541	1.71639e-10	-0.230316	3.54014e-08	0.243083	5.63731e-09	0.012726	0.763803	-0.34581	<1E-15	0.0597748	0.157764	-0.136283	0.00122531	-0.464894	<1E-15	-0.132184	0.00171965	0.00941767	0.824026	-0.126691	0.00266924	0.34579	<1E-15	-0.0662783	0.117197	-0.172547	4.04481e-05	-0.232142	2.73959e-08	0.211563	4.35814e-07	0.153494	0.000266529	0.0751525	0.0755726	0.392379	<1E-15	-0.372935	<1E-15	-0.416628	<1E-15	0.274336	3.98579e-11	-0.0322615	0.446096
66	Ile	0.211361	4.47226e-07	0.194986	3.34214e-06	-0.182031	1.46247e-05	0.254923	9.32847e-10	0.00136758	0.97424	-0.301277	3.25295e-13	0.0683134	0.10634	-0.119564	0.00460782	-0.40541	<1E-15	-0.117186	0.00549465	0.0339651	0.42244	-0.0975801	0.0209148	0.283307	8.50919e-12	-0.0222253	0.599697	-0.141533	0.000783069	-0.201042	1.61905e-06	0.183172	1.2893e-05	0.100039	0.0178837	0.032934	0.43667	0.377784	<1E-15	-0.324499	3.33067e-15	-0.362343	<1E-15	0.297151	7.02549e-13	-0.0462512	0.274551
67	Leu	0.32171	5.9952e-15	0.304223	1.86295e-13	-0.208562	6.38093e-07	0.217267	2.0789e-07	0.0244901	0.563039	-0.312054	4.10783e-14	0.0540175	0.201828	-0.114988	0.0064484	-0.412248	<1E-15	-0.130888	0.00191047	0.00641383	0.879628	-0.116068	0.00596252	0.383679	<1E-15	-0.0632474	0.134951	-0.164138	9.53889e-05	-0.210157	5.21446e-07	0.257796	5.94432e-10	0.20916	5.91676e-07	0.141827	0.000763286	0.369759	<1E-15	-0.32146	6.21725e-15	-0.361696	<1E-15	0.27762	2.27938e-11	0.0387888	0.359559
68	Val	0.271005	6.97233e-11	0.253158	1.227e-09	-0.252203	1.42182e-09	0.23889	1.04278e-08	0.00771199	0.855509	-0.36559	<1E-15	0.0544955	0.197859	-0.14975	0.000376695	-0.493236	<1E-15	-0.134694	0.00139883	0.00208465	0.960743	-0.138125	0.001049	0.321565	6.21725e-15	-0.0843052	0.046139	-0.178022	2.26271e-05	-0.242149	6.47162e-09	0.177228	2.46419e-05	0.12906	0.00221261	0.0450301	0.287435	0.382256	<1E-15	-0.400262	<1E-15	-0.445257	<1E-15	0.241033	7.62617e-09	-0.0677479	0.109274
69	Phe	0.399512	<1E-15	0.357402	<1E-15	-0.281753	1.1164e-11	0.0787194	0.0626641	-0.0228199	0.58997	-0.306439	1.22125e-13	0.0616498	0.145109	-0.172743	3.96285e-05	-0.440409	<1E-15	-0.168527	6.12679e-05	-0.0968915	0.0218396	-0.20399	1.12861e-06	0.400193	<1E-15	-0.226646	5.88856e-08	-0.253433	1.17573e-09	-0.314234	2.66454e-14	0.205791	9.02894e-07	0.219848	1.47744e-07	0.110366	0.00895189	0.257673	6.06091e-10	-0.401299	<1E-15	-0.427325	<1E-15	0.100507	0.0173529	0.0606897	0.151489
70	Tyr	0.136886	0.0011767	0.108938	0.00995032	-0.231504	3.08369e-08	0.213309	3.56702e-07	-0.0247875	0.55866	-0.273261	4.97136e-11	0.0431236	0.308788	-0.120071	0.00447186	-0.389499	<1E-15	-0.100278	0.0177128	-0.02494	0.556242	-0.121668	0.0039656	0.162431	0.000114588	-0.0618723	0.14402	-0.102191	0.0156468	-0.203551	1.21776e-06	0.0891276	0.0351403	0.0660649	0.118714	-0.0207411	0.624601	0.327059	2.22045e-15	-0.317383	1.5099e-14	-0.370775	<1E-15	0.225707	6.88086e-08	-0.105883	0.0122507
71	Glucose	-0.646951	<1E-15	-0.644197	<1E-15	0.0613769	0.147993	0.065118	0.124779	-0.112488	0.0078773	0.0778651	0.066307	-0.116724	0.00581493	0.101476	0.0165876	0.121744	0.0040082	0.0500505	0.238271	0.0703529	0.0971736	0.0415935	0.327155	-0.619656	<1E-15	0.263557	2.6457e-10	0.175062	3.26061e-05	0.181394	1.65316e-05	-0.469654	<1E-15	-0.553948	<1E-15	-0.466122	<1E-15	0.0562155	0.185237	0.178231	2.32787e-05	0.128264	0.00242233	-0.064821	0.126512	-0.486915	<1E-15
72	Lactate	0.719427	<1E-15	0.757754	<1E-15	-0.0667612	0.114545	-0.0537112	0.2044	0.124383	0.00319509	-0.101621	0.0161443	0.104087	0.0137262	-0.0208216	0.622945	-0.107591	0.0108408	-0.0286201	0.499104	-0.00168819	0.968204	-0.0160859	0.704067	0.686301	<1E-15	-0.162529	0.000111889	-0.0947749	0.0249082	-0.0679179	0.108385	0.561429	<1E-15	0.614782	<1E-15	0.564718	<1E-15	-0.0181982	0.667398	-0.0525643	0.214245	-0.0380768	0.368454	0.0983961	0.0198629	0.515001	<1E-15
73	Pyruvate	0.606055	<1E-15	0.612006	<1E-15	-0.00934121	0.825432	-0.0581148	0.169648	0.0722999	0.0873874	0.00861478	0.838814	0.112551	0.00767691	0.0170856	0.686621	0.000449277	0.991536	0.0188332	0.656524	0.00964309	0.819885	0.0373458	0.377725	0.514224	<1E-15	-0.13627	0.00122663	-0.0572713	0.175938	-0.0295334	0.485504	0.535752	<1E-15	0.573929	<1E-15	0.551747	<1E-15	-0.0383282	0.365298	-0.00811753	0.848001	0.0278056	0.511401	0.087869	0.0376417	0.520839	<1E-15
74	Citrate	0.0165169	0.697043	0.0927914	0.0283985	0.284425	7.62057e-12	-0.0708453	0.0945526	-0.00150276	0.971746	0.21053	5.21209e-07	0.0820725	0.0526671	0.161556	0.000126628	0.262532	3.00644e-10	0.10413	0.013857	0.129294	0.00221203	0.178401	2.24735e-05	0.0692837	0.102067	0.0709455	0.0940859	0.168941	6.05556e-05	0.273954	4.60452e-11	0.126187	0.00282604	0.112922	0.00758481	0.236922	1.47128e-08	-0.110546	0.00896258	0.383722	<1E-15	0.385438	<1E-15	0.0404311	0.340431	0.234157	2.18292e-08
75	Glycerol	-0.0442707	0.359214	-0.0944741	0.049993	0.159706	0.000876792	0.152165	0.00153317	0.106205	0.0274745	-0.100121	0.0377322	0.0848512	0.078473	0.0938599	0.0515079	0.037916	0.432364	-0.00686268	0.887032	0.103564	0.0315883	0.0868073	0.0718081	-0.0117743	0.807432	0.25854	5.1896e-08	0.10942	0.023096	0.0944701	0.0500029	0.0220418	0.648156	-0.120673	0.0121717	-0.0909564	0.0591964	0.223406	2.81496e-06	0.0564749	0.242009	0.070063	0.146472	0.316972	1.6295e-11	-0.0406113	0.400341
76	bOHbutyrate	0.0128963	0.761989	0.0739877	0.0818739	0.365691	<1E-15	-0.035051	0.410285	0.079053	0.0629714	0.273473	5.8517e-11	0.12033	0.00456616	0.174088	3.79212e-05	0.342257	<1E-15	0.142645	0.000759605	0.12002	0.00467246	0.289515	3.6966e-12	0.0815335	0.0551197	0.0977634	0.0213693	0.189626	6.98888e-06	0.251465	1.94737e-09	0.151342	0.000350575	0.146303	0.00055155	0.2321	3.2707e-08	-0.192352	5.11927e-06	0.369087	<1E-15	0.379499	<1E-15	0.0745188	0.0796983	0.285176	7.94009e-12
77	Acetate	-0.655764	<1E-15	-0.642339	<1E-15	0.0941371	0.0259031	-0.0786197	0.0629985	-0.117219	0.00548152	0.0820903	0.0521917	-0.136262	0.00122741	0.0643663	0.12817	0.110524	0.00885383	-0.0530526	0.210012	-0.00113819	0.97856	-0.015295	0.717982	-0.540529	<1E-15	0.181097	1.62028e-05	0.0865901	0.0405242	0.149182	0.000396752	-0.516647	<1E-15	-0.559232	<1E-15	-0.450229	<1E-15	-0.0670922	0.112755	0.168064	6.42304e-05	0.13411	0.00146808	-0.16341	0.000102549	-0.433774	<1E-15
78	Acetoacetate	-0.559523	<1E-15	-0.522225	<1E-15	0.265508	1.72567e-10	0.0487593	0.249336	-0.0747986	0.0769638	0.18116	1.60911e-05	-0.0190917	0.652117	0.131854	0.00176645	0.222847	9.88096e-08	0.0573541	0.175313	0.0957332	0.0234755	0.15085	0.000340568	-0.475467	<1E-15	0.238716	1.06959e-08	0.170187	5.16714e-05	0.213197	3.53278e-07	-0.411638	<1E-15	-0.48554	<1E-15	-0.374727	<1E-15	0.0108751	0.797345	0.251383	1.61284e-09	0.217249	2.08375e-07	-0.0183705	0.66444	-0.336202	4.44089e-16
79	Acetone	-0.070729	0.094503	-0.0118725	0.779219	0.280747	1.32965e-11	-0.0843357	0.04606	-0.0120123	0.776687	0.177561	2.3779e-05	0.0295963	0.484575	0.146518	0.000504621	0.21616	2.40393e-07	-0.0195797	0.643831	0.0803987	0.0572487	0.110692	0.00875028	0.0770433	0.0684836	0.0579703	0.170714	0.0879514	0.0374621	0.175653	2.91544e-05	0.0918979	0.0296717	0.0626782	0.138506	0.13719	0.00113532	-0.155177	0.000227528	0.252694	1.31805e-09	0.240397	8.37047e-09	0.034411	0.41637	0.178077	2.24939e-05
80	Creatinine	0.0138933	0.744431	0.00737611	0.862599	-0.0468038	0.271879	0.114909	0.00682942	-0.0930024	0.0287547	-0.100283	0.018331	0.0199668	0.639411	-0.0389905	0.360101	-0.121044	0.00436485	-0.0532892	0.210862	-0.0640728	0.132358	-0.0454475	0.286028	-0.00297581	0.944336	-0.0415913	0.328931	-0.0589797	0.166043	-0.122488	0.00391688	-0.0234132	0.582722	-0.0167495	0.694307	-0.0797743	0.0608322	0.148212	0.000470871	-0.144482	0.000654814	-0.208823	7.26022e-07	0.0257805	0.545192	-0.109525	0.00995139
81	Albumin	0.00505015	0.905084	0.120362	0.00434033	0.0947618	0.0249283	0.00542412	0.898092	0.197759	2.40478e-06	0.0565107	0.181757	0.0287656	0.496924	0.277428	2.35585e-11	0.124586	0.00314521	0.137502	0.00110577	0.179681	1.89106e-05	0.20165	1.50365e-06	0.133062	0.00160036	0.184671	1.09135e-05	0.24195	6.66455e-09	0.306378	1.23457e-13	0.210401	5.05476e-07	0.181913	1.48146e-05	0.286917	4.49907e-12	-0.0550845	0.193049	0.214361	3.03906e-07	0.183581	1.2321e-05	0.17138	4.56748e-05	0.12652	0.00270527
82	GlycA	0.174352	3.34625e-05	0.0126417	0.76532	-0.073192	0.0835427	0.192012	4.73217e-06	-0.138079	0.0010531	-0.089942	0.0333392	0.147524	0.000461024	-0.190674	5.52373e-06	-0.125059	0.00303197	0.00693274	0.869972	-0.130981	0.00189611	-0.0378619	0.371165	0.00855437	0.839929	-0.104241	0.0135867	-0.133239	0.00157737	-0.294487	1.14753e-12	-0.0428019	0.311979	0.0343417	0.41731	-0.123353	0.00345894	0.235785	1.63249e-08	-0.237493	1.27682e-08	-0.197713	2.41825e-06	-0.0761721	0.0716791	-0.0194665	0.645749
83	XXL_VLDL_P	-0.170088	5.22032e-05	-0.221998	1.10798e-07	-0.0047244	0.91118	0.337017	2.22045e-16	-0.161281	0.00012649	-0.290478	2.37765e-12	-0.0989508	0.0191745	-0.139547	0.000929237	-0.217155	2.10987e-07	-0.167018	7.14355e-05	-0.0226478	0.592778	-0.120764	0.00421117	-0.0797832	0.0591865	0.23714	1.34351e-08	-0.100827	0.0169977	-0.176201	2.7503e-05	-0.138811	0.00098956	-0.240896	7.78136e-09	-0.330554	8.88178e-16	0.720067	<1E-15	-0.206826	7.93619e-07	-0.253671	1.13319e-09	0.30433	1.82521e-13	-0.329689	1.11022e-15
84	XXL_VLDL_L	-0.172194	4.19662e-05	-0.220753	1.30927e-07	-0.0240595	0.569925	0.316265	1.77636e-14	-0.162114	0.000116548	-0.295797	9.01945e-13	-0.110609	0.00880112	-0.147941	0.000443997	-0.23245	2.62342e-08	-0.183735	1.21119e-05	-0.0374353	0.376582	-0.147702	0.000453698	-0.0784201	0.063672	0.215872	2.49631e-07	-0.113296	0.00728074	-0.188635	6.97838e-06	-0.14618	0.000520121	-0.246073	3.61044e-09	-0.336268	4.44089e-16	0.705541	<1E-15	-0.219546	1.53786e-07	-0.268488	1.05858e-10	0.303944	1.96509e-13	-0.335545	4.44089e-16
85	XXL_VLDL_PL	-0.102219	0.0155253	-0.160125	0.00014159	-0.0523632	0.216005	0.314036	2.77556e-14	-0.165194	8.5836e-05	-0.324589	3.33067e-15	-0.103933	0.0138672	-0.186778	8.61443e-06	-0.278506	1.9579e-11	-0.198754	2.13477e-06	-0.0589823	0.163356	-0.161367	0.000125424	-0.0120494	0.776017	0.178578	2.13102e-05	-0.150295	0.00035839	-0.230195	3.60052e-08	-0.0977035	0.0207526	-0.19736	2.52233e-06	-0.302726	2.47358e-13	0.704029	<1E-15	-0.27147	6.45164e-11	-0.31143	4.64073e-14	0.304917	1.63203e-13	-0.301575	3.07532e-13
86	XXL_VLDL_C	-0.0278071	0.511378	-0.0816845	0.0533697	-0.00746873	0.860019	0.362999	<1E-15	-0.128697	0.00227765	-0.316579	1.68754e-14	-0.0719812	0.0887953	-0.154241	0.00024851	-0.253598	1.14612e-09	-0.167359	6.90079e-05	-0.014214	0.73715	-0.100638	0.0172072	0.0588953	0.16398	0.215204	2.72357e-07	-0.123033	0.0035447	-0.191998	4.73983e-06	-0.00469715	0.91169	-0.104758	0.0131265	-0.205314	9.58055e-07	0.719589	<1E-15	-0.242642	6.01741e-09	-0.276728	2.65499e-11	0.336948	2.22045e-16	-0.211575	4.35155e-07
87	XXL_VLDL_CE	0.0183988	0.663956	-0.0373225	0.378023	0.0304421	0.472172	0.384712	<1E-15	-0.110233	0.00903534	-0.292829	1.55298e-12	-0.0429681	0.310102	-0.13639	0.00121434	-0.222056	1.09939e-07	-0.138828	0.000988125	0.00141842	0.973283	-0.0620177	0.14272	0.0960407	0.0230313	0.227539	5.20693e-08	-0.105683	0.0123379	-0.171371	4.57146e-05	0.0469025	0.267842	-0.0443245	0.295063	-0.142755	0.000703986	0.717759	<1E-15	-0.21011	5.24517e-07	-0.242303	6.32677e-09	0.344564	<1E-15	-0.150185	0.000361998
88	XXL_VLDL_FC	-0.08606	0.0417725	-0.136843	0.00116895	-0.0512337	0.226088	0.330817	8.88178e-16	-0.148983	0.000403983	-0.338074	2.22045e-16	-0.104769	0.0131167	-0.173123	3.80824e-05	-0.284173	7.30882e-12	-0.198232	2.27272e-06	-0.0353837	0.403311	-0.14279	0.000701849	0.0094217	0.823952	0.195069	3.30938e-06	-0.140341	0.000867993	-0.212369	3.93026e-07	-0.0710422	0.0930487	-0.178708	2.10133e-05	-0.279508	1.6475e-11	0.704807	<1E-15	-0.27444	3.91622e-11	-0.310357	5.72875e-14	0.315025	2.28706e-14	-0.283055	8.89311e-12
89	XXL_VLDL_TG	-0.235886	1.60884e-08	-0.276877	2.58864e-11	-0.0318123	0.452457	0.285372	5.91571e-12	-0.169463	5.5667e-05	-0.271742	6.16505e-11	-0.121584	0.00395815	-0.137719	0.00108564	-0.211943	4.15101e-07	-0.183764	1.2074e-05	-0.0466842	0.270078	-0.164537	9.1669e-05	-0.142965	0.000691162	0.210409	5.04944e-07	-0.107897	0.0106166	-0.182887	1.33067e-05	-0.207977	6.86867e-07	-0.30515	1.56097e-13	-0.386981	<1E-15	0.674052	<1E-15	-0.20513	9.80225e-07	-0.261477	3.31068e-10	0.278493	1.9623e-11	-0.385098	<1E-15
90	XL_VLDL_P	-0.243246	5.50341e-09	-0.276843	2.6037e-11	0.121251	0.00405917	0.424356	<1E-15	-0.139536	0.000930095	-0.201508	1.52984e-06	-0.0609834	0.149515	-0.0627197	0.138244	-0.0873828	0.0387164	-0.0672101	0.112122	0.0637442	0.131907	0.00260767	0.950905	-0.170706	4.89779e-05	0.339637	<1E-15	-0.00542928	0.897995	-0.0706395	0.0949218	-0.164896	8.84421e-05	-0.253559	1.15298e-09	-0.311774	4.35207e-14	0.704534	<1E-15	-0.0663822	0.116622	-0.126599	0.00268849	0.255375	8.69329e-10	-0.323492	3.9968e-15
91	XL_VLDL_L	-0.244328	4.68598e-09	-0.276072	2.96951e-11	0.11159	0.00821597	0.420588	<1E-15	-0.137888	0.00107024	-0.203652	1.1766e-06	-0.0659284	0.119148	-0.0631203	0.135739	-0.0923313	0.0289077	-0.0708273	0.0940447	0.0620384	0.142586	-0.00463545	0.912845	-0.170832	4.83443e-05	0.335604	4.44089e-16	-0.0099484	0.814285	-0.0744263	0.0784495	-0.165951	7.95568e-05	-0.254925	9.32499e-10	-0.313862	2.88658e-14	0.702969	<1E-15	-0.0725999	0.086079	-0.133106	0.00159469	0.259314	4.67499e-10	-0.32664	2.22045e-15
92	XL_VLDL_PL	-0.220426	1.36772e-07	-0.261092	3.52134e-10	0.101025	0.0167815	0.423597	<1E-15	-0.151576	0.000318538	-0.21398	3.19293e-07	-0.0612178	0.147954	-0.0828798	0.0499623	-0.119208	0.00473187	-0.0754686	0.0743477	0.0514699	0.223952	-0.011091	0.793411	-0.150817	0.000341614	0.311896	4.24105e-14	-0.0334157	0.429987	-0.101441	0.0163338	-0.152053	0.000304767	-0.236589	1.45449e-08	-0.305567	1.44329e-13	0.708372	<1E-15	-0.108005	0.0105385	-0.163726	9.93763e-05	0.250412	1.87155e-09	-0.319359	9.76996e-15
93	XL_VLDL_C	-0.156498	0.000200737	-0.191702	4.90493e-06	0.159025	0.000157532	0.474851	<1E-15	-0.121118	0.00410033	-0.179464	1.93611e-05	-0.0182826	0.665949	-0.0461253	0.275861	-0.0834654	0.0483607	-0.0218789	0.605397	0.104126	0.0136909	0.0692578	0.10158	-0.095598	0.0236733	0.336262	4.44089e-16	-0.00589868	0.889231	-0.0645845	0.126878	-0.0710931	0.0928137	-0.150996	0.000336017	-0.212764	3.73557e-07	0.685517	<1E-15	-0.0758841	0.072762	-0.12214	0.00379452	0.241882	6.73196e-09	-0.236279	1.52075e-08
94	XL_VLDL_CE	-0.109598	0.00944287	-0.137941	0.0010655	0.209057	5.99484e-07	0.496022	<1E-15	-0.0974199	0.0211268	-0.136789	0.00117434	0.0159815	0.705899	-0.0138973	0.742797	-0.0386331	0.361493	0.0243539	0.565213	0.138837	0.000987348	0.133967	0.00148553	-0.0600385	0.155936	0.345427	<1E-15	0.0193537	0.647663	-0.0304824	0.471586	-0.0133713	0.752207	-0.0852989	0.0436216	-0.137384	0.00111685	0.639368	<1E-15	-0.0336868	0.426254	-0.0716324	0.0903565	0.221112	1.24785e-07	-0.162776	0.000109187
95	XL_VLDL_FC	-0.198277	2.26045e-06	-0.237745	1.23115e-08	0.102487	0.015255	0.437465	<1E-15	-0.145556	0.000549867	-0.216493	2.30128e-07	-0.0551061	0.192874	-0.0812277	0.0547219	-0.126097	0.00279651	-0.0685091	0.10534	0.0615154	0.145989	0.00197142	0.962873	-0.129767	0.0020909	0.312191	3.9968e-14	-0.0338485	0.424035	-0.100362	0.0175163	-0.128248	0.00236045	-0.213707	3.30742e-07	-0.284383	7.04348e-12	0.707821	<1E-15	-0.119576	0.00460371	-0.170459	5.02416e-05	0.252105	1.44349e-09	-0.30153	3.10196e-13
96	XL_VLDL_TG	-0.273696	4.44089e-11	-0.300487	3.77476e-13	0.0965411	0.0223238	0.391827	<1E-15	-0.1374	0.00111532	-0.201533	1.52528e-06	-0.0812359	0.0546974	-0.0623115	0.140833	-0.0862838	0.0412415	-0.0832429	0.0489642	0.0514785	0.223875	-0.0264696	0.531909	-0.198285	2.25825e-06	0.333394	4.44089e-16	-0.00560889	0.89464	-0.0684147	0.105821	-0.198079	2.31471e-06	-0.289825	2.67431e-12	-0.343025	<1E-15	0.691232	<1E-15	-0.0615286	0.145903	-0.124597	0.00314267	0.262208	2.9441e-10	-0.351288	<1E-15
97	L_VLDL_P	-0.238855	1.0482e-08	-0.264921	1.89885e-10	0.133596	0.0015317	0.45567	<1E-15	-0.12847	0.00231907	-0.19216	4.65124e-06	-0.0494222	0.242951	-0.0462527	0.274535	-0.0780985	0.0647702	-0.0460217	0.276942	0.0952247	0.0242267	0.0337325	0.425625	-0.173235	3.76358e-05	0.356525	<1E-15	0.0105618	0.803062	-0.0518863	0.220222	-0.156104	0.00020841	-0.245476	3.94836e-09	-0.298788	5.18252e-13	0.695929	<1E-15	-0.062951	0.136793	-0.117488	0.00537427	0.244538	4.54224e-09	-0.314632	2.4869e-14
98	L_VLDL_L	-0.261074	3.5314e-10	-0.27956	1.63276e-11	0.130786	0.00192623	0.447272	<1E-15	-0.125894	0.00284109	-0.18229	1.42128e-05	-0.0571691	0.176711	-0.04011	0.343416	-0.0697983	0.0989326	-0.0443661	0.294609	0.0980467	0.0203075	0.0308764	0.465873	-0.195484	3.1513e-06	0.357368	<1E-15	0.015358	0.71687	-0.0454941	0.282492	-0.17396	3.48761e-05	-0.261194	3.46402e-10	-0.310937	5.10703e-14	0.674055	<1E-15	-0.0548706	0.194786	-0.112422	0.0077475	0.235336	1.74073e-08	-0.32804	1.77636e-15
99	L_VLDL_PL	-0.22735	5.3445e-08	-0.260145	4.09588e-10	0.12935	0.0021619	0.448492	<1E-15	-0.143273	0.000672748	-0.198412	2.22413e-06	-0.0534575	0.206549	-0.0681797	0.107028	-0.0928802	0.0279641	-0.05537	0.190748	0.0779669	0.0652242	0.0203612	0.630654	-0.166922	7.21276e-05	0.336677	2.22045e-16	-0.0105227	0.803776	-0.0764972	0.0704725	-0.154157	0.000250463	-0.23954	9.48644e-09	-0.300658	3.65485e-13	0.6939	<1E-15	-0.0773429	0.0674119	-0.131822	0.00177106	0.231191	3.13176e-08	-0.314176	2.70894e-14
100	L_VLDL_C	-0.18646	8.9294e-06	-0.212955	3.64484e-07	0.169007	5.8333e-05	0.48165	<1E-15	-0.117634	0.00531679	-0.171761	4.38993e-05	-0.0256013	0.545456	-0.0379137	0.37051	-0.0640583	0.13001	-0.0111344	0.792623	0.118065	0.00515049	0.0814482	0.0540657	-0.136317	0.00122177	0.353079	<1E-15	0.0163106	0.700132	-0.0432851	0.306543	-0.102914	0.0148339	-0.181409	1.56588e-05	-0.234929	1.84509e-08	0.670233	<1E-15	-0.0527129	0.212951	-0.0989044	0.0192312	0.219921	1.46308e-07	-0.255333	8.75005e-10
101	L_VLDL_CE	-0.159449	0.000151202	-0.182433	1.39904e-05	0.191839	4.82813e-06	0.493975	<1E-15	-0.100718	0.0171179	-0.155561	0.000219426	-0.00910827	0.829718	-0.0194071	0.646757	-0.0481904	0.254909	0.01319	0.75546	0.139946	0.000898002	0.118516	0.00498127	-0.11787	0.00522493	0.359763	<1E-15	0.0323848	0.44436	-0.0231144	0.585177	-0.0710854	0.0928493	-0.145591	0.000548177	-0.195973	2.97436e-06	0.648921	<1E-15	-0.0389921	0.357045	-0.0763393	0.0710565	0.207211	7.56277e-07	-0.214764	2.88384e-07
102	L_VLDL_FC	-0.208131	6.73735e-07	-0.238904	1.04078e-08	0.142279	0.000733832	0.462151	<1E-15	-0.13283	0.00163113	-0.186695	8.6956e-06	-0.0431624	0.307918	-0.0584302	0.16734	-0.0817703	0.0531188	-0.0358488	0.397155	0.0912845	0.0307827	0.0422315	0.318477	-0.152779	0.000284901	0.338027	2.22045e-16	-0.0033733	0.936517	-0.0677062	0.109493	-0.134167	0.00146123	-0.214969	2.80813e-07	-0.273162	4.8582e-11	0.680058	<1E-15	-0.0688686	0.103521	-0.123155	0.00351173	0.225744	6.66389e-08	-0.291974	1.8141e-12
103	L_VLDL_TG	-0.301406	3.17524e-13	-0.3085	8.21565e-14	0.108098	0.0104718	0.419354	<1E-15	-0.121236	0.00406398	-0.176916	2.54797e-05	-0.071848	0.0893888	-0.0330757	0.434698	-0.0622824	0.141019	-0.0552899	0.191391	0.0956854	0.0235453	0.0102559	0.808654	-0.228374	4.63875e-08	0.356743	<1E-15	0.0228169	0.590019	-0.0351052	0.407025	-0.212343	3.94343e-07	-0.301969	2.85549e-13	-0.343515	<1E-15	0.651903	<1E-15	-0.0473809	0.262987	-0.109104	0.00977098	0.237469	1.28115e-08	-0.359879	<1E-15
104	M_VLDL_P	-0.140039	0.000890821	-0.130405	0.00198641	0.270918	7.07394e-11	0.536551	<1E-15	-0.0122787	0.771871	-0.0675338	0.110401	0.0605114	0.152696	0.114508	0.00667533	0.0680009	0.107953	0.11366	0.00709381	0.262808	2.6731e-10	0.271524	6.39402e-11	-0.0902241	0.0327874	0.442139	<1E-15	0.139435	0.000938168	0.115286	0.00631097	0.00875732	0.836184	-0.0732691	0.0832168	-0.0791568	0.0612142	0.577419	<1E-15	0.0618177	0.144015	0.0421481	0.319434	0.209425	5.72169e-07	-0.121695	0.00392502
105	M_VLDL_L	-0.174226	3.39127e-05	-0.162064	0.00011713	0.257306	6.42203e-10	0.542345	<1E-15	-0.0168642	0.690471	-0.0850891	0.0441432	0.0369905	0.382283	0.10103	0.016776	0.0597925	0.157641	0.0925215	0.0285777	0.249152	2.26805e-09	0.242335	6.29705e-09	-0.122134	0.00379633	0.453458	<1E-15	0.137017	0.00115193	0.106313	0.0118241	-0.0257833	0.542602	-0.114945	0.00646844	-0.125222	0.00299379	0.611562	<1E-15	0.0593465	0.160768	0.0331679	0.433417	0.232804	2.49526e-08	-0.161442	0.000124508
106	M_VLDL_PL	-0.116542	0.00576004	-0.103459	0.0143093	0.302054	2.81108e-13	0.540707	<1E-15	0.00832594	0.844148	-0.0342091	0.419112	0.0807675	0.0561127	0.142184	0.000739935	0.106639	0.011566	0.146788	0.000492559	0.285699	5.58398e-12	0.315168	2.22045e-14	-0.0742791	0.0790433	0.453269	<1E-15	0.166647	7.41654e-05	0.148553	0.000420069	0.0450268	0.28747	-0.0314323	0.457878	-0.0300801	0.477459	0.55087	<1E-15	0.0990717	0.0190273	0.085064	0.0442061	0.205895	8.91321e-07	-0.0738139	0.0809442
107	M_VLDL_C	-0.0179638	0.671431	0.0213245	0.614571	0.340927	<1E-15	0.4781	<1E-15	0.0863319	0.0411283	0.0694744	0.100512	0.143412	0.000664613	0.238184	1.15531e-08	0.197542	2.46812e-06	0.238503	1.10304e-08	0.338257	2.22045e-16	0.429678	<1E-15	0.00504817	0.905121	0.41434	<1E-15	0.223047	9.61831e-08	0.241634	6.98228e-09	0.166506	7.52263e-05	0.116823	0.00564293	0.150039	0.000366869	0.348227	<1E-15	0.1842	1.15022e-05	0.189736	6.15303e-06	0.139925	0.000899594	0.0931624	0.0274895
108	M_VLDL_CE	0.0374124	0.376875	0.0840996	0.0466749	0.340346	<1E-15	0.408447	<1E-15	0.124508	0.00316429	0.119358	0.00467906	0.178513	2.14615e-05	0.279671	1.60192e-11	0.232922	2.45384e-08	0.274478	3.89151e-11	0.342517	<1E-15	0.467194	<1E-15	0.0532664	0.208179	0.36434	<1E-15	0.235395	1.72609e-08	0.272654	5.29137e-11	0.227437	5.28091e-08	0.191447	5.05206e-06	0.240183	8.63657e-09	0.218341	1.8044e-07	0.217276	2.07636e-07	0.230281	3.55746e-08	0.102002	0.0157477	0.175121	3.08502e-05
109	M_VLDL_FC	-0.0888987	0.0354491	-0.0645987	0.126795	0.31721	1.46549e-14	0.527865	<1E-15	0.031784	0.45286	-0.00139006	0.973817	0.0946433	0.0251109	0.173661	3.59909e-05	0.139751	0.000913128	0.177878	2.29816e-05	0.305003	1.60538e-13	0.353331	<1E-15	-0.0562968	0.183418	0.444995	<1E-15	0.189463	6.34834e-06	0.183927	1.18562e-05	0.0773862	0.0672581	0.0143298	0.735089	0.0262184	0.535811	0.487714	<1E-15	0.130042	0.00204526	0.124045	0.00327964	0.178364	2.18076e-05	-0.0192065	0.650163
110	M_VLDL_TG	-0.241938	6.6767e-09	-0.244881	4.31519e-09	0.160553	0.000135816	0.488277	<1E-15	-0.079992	0.0585232	-0.167665	6.68939e-05	-0.0358602	0.397005	0.00605865	0.886247	-0.0361205	0.393584	-0.0123239	0.771055	0.150896	0.00033913	0.0929208	0.0278954	-0.182773	1.34744e-05	0.403823	<1E-15	0.0620294	0.142644	0.0102454	0.808845	-0.136046	0.00124983	-0.235604	1.67528e-08	-0.272129	5.77851e-11	0.670062	<1E-15	-0.0207161	0.624708	-0.0652256	0.123143	0.256372	7.43651e-10	-0.288575	3.3471e-12
111	S_VLDL_P	-0.0821462	0.0520314	-0.11063	0.00878804	0.255637	8.34468e-10	0.51899	<1E-15	-0.0560143	0.18563	-0.0970587	0.0216118	0.0455947	0.281428	0.0390337	0.356532	0.0363785	0.390212	0.0825467	0.0508932	0.18306	1.30542e-05	0.23478	1.88462e-08	-0.0651556	0.123547	0.390634	<1E-15	0.0948243	0.0248326	0.0642129	0.129083	0.00645582	0.878846	-0.0574132	0.174868	-0.0823318	0.0515013	0.615776	<1E-15	0.0302919	0.474362	0.0253666	0.549147	0.18472	1.08542e-05	-0.0968579	0.0218856
112	S_VLDL_L	-0.0634372	0.133782	-0.0833172	0.0487619	0.28502	6.29585e-12	0.528995	<1E-15	-0.0269591	0.524347	-0.07398	0.0802613	0.0638452	0.131295	0.0690213	0.102755	0.0691895	0.101918	0.106885	0.011375	0.213885	3.23244e-07	0.273408	4.66172e-11	-0.0447742	0.290186	0.411586	<1E-15	0.124695	0.0031188	0.101407	0.0163699	0.0449488	0.288308	-0.0207887	0.623495	-0.0358861	0.396664	0.599876	<1E-15	0.0688006	0.103863	0.0657315	0.120257	0.19901	2.07004e-06	-0.0535413	0.205838
113	S_VLDL_PL	-0.0349909	0.408555	-0.033771	0.425097	0.325388	2.66454e-15	0.526685	<1E-15	0.0150195	0.722851	-0.00869145	0.837399	0.106342	0.0118012	0.13439	0.00143451	0.129735	0.00209623	0.169602	5.48806e-05	0.266903	1.37392e-10	0.355663	<1E-15	-0.0218222	0.606332	0.412483	<1E-15	0.163113	0.000105607	0.157251	0.000186827	0.100805	0.0170218	0.0445765	0.292323	0.0498068	0.239299	0.499499	<1E-15	0.120948	0.00415334	0.127068	0.00259114	0.158867	0.000159957	0.0197226	0.641413
114	S_VLDL_C	0.0451499	0.286153	0.0377942	0.372021	0.337938	2.22045e-16	0.469059	<1E-15	0.017421	0.680804	0.0381663	0.367328	0.137761	0.00108188	0.13493	0.00137165	0.155605	0.000218501	0.193209	4.11681e-06	0.246321	3.47874e-09	0.377501	<1E-15	0.0413489	0.328705	0.345827	<1E-15	0.149879	0.000372286	0.153686	0.000261768	0.165132	8.63724e-05	0.135505	0.00130757	0.142253	0.000735543	0.399617	<1E-15	0.143681	0.000649098	0.155487	0.000220962	0.109095	0.00977725	0.116351	0.00584105
115	S_VLDL_CE	0.075521	0.0741462	0.0527078	0.212995	0.33037	8.88178e-16	0.443973	<1E-15	-0.00163359	0.969232	0.0356915	0.39923	0.140186	0.000879685	0.105285	0.0126716	0.143303	0.000670976	0.182103	1.45086e-05	0.212606	3.81243e-07	0.357766	<1E-15	0.0625674	0.139206	0.309484	6.79456e-14	0.12446	0.00317621	0.124984	0.00304985	0.175941	2.82752e-05	0.155468	0.000221358	0.153954	0.000255281	0.392036	<1E-15	0.133968	0.00148544	0.145175	0.000568802	0.0988265	0.0193268	0.136419	0.00121138
116	S_VLDL_FC	-0.00597426	0.887821	0.0126805	0.764622	0.340165	<1E-15	0.49782	<1E-15	0.0500305	0.237193	0.0418245	0.323168	0.132506	0.00167499	0.182146	1.44403e-05	0.173386	3.70435e-05	0.212671	3.78025e-07	0.29695	7.29194e-13	0.404277	<1E-15	0.00371489	0.930104	0.397417	<1E-15	0.188957	6.72608e-06	0.197484	2.48527e-06	0.144005	0.000630859	0.100352	0.0175276	0.120119	0.00442042	0.398532	<1E-15	0.158355	0.000168058	0.169703	5.43119e-05	0.12146	0.00399555	0.0806466	0.0564831
117	S_VLDL_TG	-0.151001	0.000335884	-0.185924	9.48477e-06	0.171383	4.56583e-05	0.48599	<1E-15	-0.0778427	0.0656548	-0.186074	9.3256e-06	-0.0237727	0.574533	-0.0159066	0.707213	-0.0410753	0.331918	-0.0129936	0.758988	0.12314	0.00351566	0.112823	0.0075297	-0.118374	0.00503391	0.393883	<1E-15	0.0644576	0.127628	0.0162522	0.701154	-0.083789	0.0474943	-0.171849	4.34998e-05	-0.212429	3.90001e-07	0.695696	<1E-15	-0.0209412	0.620948	-0.0426432	0.313778	0.249195	2.2533e-09	-0.211944	4.15034e-07
118	XS_VLDL_P	0.0558649	0.186807	0.0301798	0.476	0.429747	<1E-15	0.435597	<1E-15	0.0608708	0.150269	0.12029	0.00436383	0.208589	6.35918e-07	0.251427	1.60208e-09	0.27511	3.49654e-11	0.271467	6.45493e-11	0.328644	1.33227e-15	0.490318	<1E-15	0.0675764	0.110176	0.435405	<1E-15	0.293903	1.27676e-12	0.302638	2.51799e-13	0.221078	1.25358e-07	0.190835	5.42225e-06	0.227974	4.90289e-08	0.38625	<1E-15	0.280751	1.32865e-11	0.311292	4.75175e-14	0.171223	4.64258e-05	0.218955	1.66346e-07
119	XS_VLDL_L	0.0401521	0.34291	0.00785172	0.85292	0.416422	<1E-15	0.443227	<1E-15	0.0442015	0.296406	0.100739	0.0170952	0.197215	2.56632e-06	0.23396	2.11807e-08	0.252281	1.40479e-09	0.257354	6.3737e-10	0.317341	1.44329e-14	0.473403	<1E-15	0.0484258	0.252593	0.437323	<1E-15	0.284873	6.46105e-12	0.288928	3.14193e-12	0.200178	1.79794e-06	0.16375	9.91391e-05	0.195083	3.30422e-06	0.408632	<1E-15	0.260749	3.71978e-10	0.291613	1.93667e-12	0.17857	2.13284e-05	0.190655	5.53592e-06
120	XS_VLDL_PL	0.0375454	0.37518	-0.0150018	0.723164	0.37833	<1E-15	0.421425	<1E-15	-0.00404315	0.923945	0.0727661	0.0853609	0.17773	2.33488e-05	0.177729	2.33521e-05	0.200825	1.66244e-06	0.219233	1.60323e-07	0.261142	3.49273e-10	0.416372	<1E-15	0.0320006	0.449784	0.384738	<1E-15	0.227747	5.05969e-08	0.221469	1.18955e-07	0.164475	9.22419e-05	0.132303	0.00170299	0.144026	0.000629659	0.416878	<1E-15	0.200277	1.77651e-06	0.234723	1.90006e-08	0.154606	0.000240121	0.155177	0.00022754
121	XS_VLDL_C	0.0571396	0.176935	0.0559267	0.18632	0.442012	<1E-15	0.398886	<1E-15	0.107192	0.0111401	0.181519	1.54712e-05	0.237602	1.25684e-08	0.317766	1.33227e-14	0.317803	1.31006e-14	0.320115	8.21565e-15	0.378547	<1E-15	0.53771	<1E-15	0.0763717	0.0709364	0.434636	<1E-15	0.339826	<1E-15	0.357767	<1E-15	0.261307	3.40216e-10	0.232897	2.46273e-08	0.287296	4.20552e-12	0.278253	2.04512e-11	0.326751	2.22045e-15	0.35564	<1E-15	0.161167	0.000127909	0.263617	2.34595e-10
122	XS_VLDL_CE	0.0691026	0.10235	0.0769264	0.0689053	0.440814	<1E-15	0.382648	<1E-15	0.135424	0.00131644	0.195358	3.19862e-06	0.248345	2.56354e-09	0.344484	<1E-15	0.33074	8.88178e-16	0.336188	4.44089e-16	0.401435	<1E-15	0.551878	<1E-15	0.0959356	0.0231823	0.434378	<1E-15	0.355882	<1E-15	0.378493	<1E-15	0.289627	2.77156e-12	0.257611	6.12089e-10	0.319915	8.43769e-15	0.243746	5.11002e-09	0.342311	<1E-15	0.368118	<1E-15	0.169252	5.68867e-05	0.285432	5.85421e-12
123	XS_VLDL_FC	0.0211367	0.617693	0.00072349	0.986371	0.426993	<1E-15	0.421243	<1E-15	0.0418976	0.322322	0.138876	0.000984087	0.203334	1.22361e-06	0.24075	7.94922e-09	0.276141	2.93465e-11	0.272431	5.49307e-11	0.312768	3.57492e-14	0.483704	<1E-15	0.0245611	0.561907	0.41835	<1E-15	0.289692	2.73936e-12	0.295321	9.84546e-13	0.185237	1.02442e-05	0.16461	9.10057e-05	0.19795	2.35051e-06	0.349668	<1E-15	0.277927	2.16276e-11	0.310253	5.83977e-14	0.138858	0.000985567	0.200138	1.80675e-06
124	XS_VLDL_TG	-0.00572485	0.892475	-0.0710675	0.0929318	0.292707	1.58784e-12	0.447258	<1E-15	-0.0354194	0.402837	-0.0566153	0.180948	0.08681	0.0400157	0.0786427	0.0629211	0.110133	0.00909843	0.110906	0.00862009	0.180078	1.81115e-05	0.289255	2.96274e-12	-0.00192284	0.963788	0.39472	<1E-15	0.163141	0.000105316	0.141609	0.000777864	0.0726914	0.085683	0.0179554	0.671576	0.0112112	0.791225	0.573854	<1E-15	0.121221	0.00406843	0.136852	0.00116811	0.202665	1.32824e-06	0.0276666	0.513516
125	IDL_P	-0.0066985	0.874328	0.027428	0.517156	0.448005	<1E-15	0.398523	<1E-15	0.119485	0.00463517	0.204923	1.00574e-06	0.228197	4.75409e-08	0.333694	4.44089e-16	0.343611	<1E-15	0.322988	4.44089e-15	0.375709	<1E-15	0.538379	<1E-15	0.0265049	0.531362	0.427052	<1E-15	0.314643	2.4647e-14	0.345468	<1E-15	0.226214	6.24805e-08	0.189448	6.35908e-06	0.257543	6.18651e-10	0.199972	1.84322e-06	0.330642	8.88178e-16	0.346546	<1E-15	0.1249	0.00306977	0.219709	1.50486e-07
126	IDL_L	0.0561665	0.184436	0.116602	0.00573496	0.474269	<1E-15	0.385258	<1E-15	0.233155	2.37436e-08	0.256313	7.50584e-10	0.265241	1.80231e-10	0.448262	<1E-15	0.431135	<1E-15	0.38204	<1E-15	0.465437	<1E-15	0.634706	<1E-15	0.10925	0.00967346	0.482884	<1E-15	0.433622	<1E-15	0.494352	<1E-15	0.330065	1.11022e-15	0.287675	3.93108e-12	0.398379	<1E-15	0.126682	0.00267112	0.44098	<1E-15	0.461486	<1E-15	0.175807	2.86828e-05	0.339065	<1E-15
127	IDL_PL	0.0700279	0.0978249	0.111851	0.00806639	0.460678	<1E-15	0.378556	<1E-15	0.196158	2.90981e-06	0.239439	9.62708e-09	0.260042	4.1639e-10	0.411069	<1E-15	0.401092	<1E-15	0.370539	<1E-15	0.440342	<1E-15	0.609722	<1E-15	0.110189	0.00906282	0.451731	<1E-15	0.395976	<1E-15	0.45206	<1E-15	0.316882	1.57652e-14	0.279146	1.75362e-11	0.378526	<1E-15	0.146889	0.000488122	0.408546	<1E-15	0.429891	<1E-15	0.153277	0.000271972	0.32555	2.66454e-15
128	IDL_C	0.0513842	0.224726	0.124669	0.00312521	0.455196	<1E-15	0.361442	<1E-15	0.253559	1.15297e-09	0.268629	1.03429e-10	0.261871	3.10767e-10	0.465199	<1E-15	0.435764	<1E-15	0.386918	<1E-15	0.474587	<1E-15	0.62989	<1E-15	0.108248	0.0103644	0.473137	<1E-15	0.441296	<1E-15	0.507544	<1E-15	0.335046	4.44089e-16	0.294605	1.12288e-12	0.41131	<1E-15	0.0750212	0.0760864	0.445073	<1E-15	0.464015	<1E-15	0.170466	5.02069e-05	0.343602	<1E-15
129	IDL_CE	0.0410396	0.332339	0.116819	0.0056444	0.452874	<1E-15	0.370557	<1E-15	0.255531	8.48309e-10	0.258359	5.43831e-10	0.256253	7.57677e-10	0.466896	<1E-15	0.430801	<1E-15	0.380635	<1E-15	0.479865	<1E-15	0.627082	<1E-15	0.104907	0.0129968	0.489997	<1E-15	0.444288	<1E-15	0.509979	<1E-15	0.332958	4.44089e-16	0.285591	5.69123e-12	0.402445	<1E-15	0.0898402	0.0335402	0.443205	<1E-15	0.460106	<1E-15	0.182879	1.33177e-05	0.331253	8.88178e-16
130	IDL_FC	0.079025	0.0616481	0.144418	0.000608267	0.447155	<1E-15	0.325003	3.10862e-15	0.238203	1.15209e-08	0.285215	6.08269e-12	0.269038	9.66653e-11	0.447779	<1E-15	0.441167	<1E-15	0.394336	<1E-15	0.445546	<1E-15	0.623319	<1E-15	0.116392	0.00582363	0.418104	<1E-15	0.424353	<1E-15	0.491534	<1E-15	0.333767	4.44089e-16	0.314855	2.35367e-14	0.42983	<1E-15	0.0355918	0.400549	0.439199	<1E-15	0.462953	<1E-15	0.130995	0.00189388	0.369406	<1E-15
131	IDL_TG	0.0622191	0.141424	0.00611482	0.8852	0.380921	<1E-15	0.405508	<1E-15	0.0337282	0.425684	0.0599911	0.156263	0.169678	5.44537e-05	0.189446	6.36062e-06	0.235759	1.63853e-08	0.205648	9.19115e-07	0.246674	3.29907e-09	0.42018	<1E-15	0.0691902	0.101915	0.398914	<1E-15	0.246471	3.40106e-09	0.254222	1.04036e-09	0.169544	5.52091e-05	0.130732	0.00193465	0.163844	9.82236e-05	0.426052	<1E-15	0.239946	8.94088e-09	0.274581	3.82399e-11	0.174771	3.20154e-05	0.178126	2.2376e-05
132	L_LDL_P	0.0442456	0.295924	0.0753433	0.0748315	0.381609	<1E-15	0.444594	<1E-15	0.117617	0.00532345	0.158518	0.000165432	0.204518	1.05744e-06	0.281213	1.22631e-11	0.284578	6.80656e-12	0.30115	3.33067e-13	0.342249	<1E-15	0.505566	<1E-15	0.0504008	0.233735	0.379861	<1E-15	0.261598	3.24679e-10	0.289229	2.97651e-12	0.223336	9.24941e-08	0.197079	2.60817e-06	0.249052	2.30271e-09	0.256237	7.59659e-10	0.251269	1.64144e-09	0.264284	2.10562e-10	0.100896	0.0169222	0.192477	4.48292e-06
133	L_LDL_L	0.0317919	0.452748	0.10377	0.0140181	0.441572	<1E-15	0.407159	<1E-15	0.233801	2.16638e-08	0.231843	2.85751e-08	0.219569	1.53331e-07	0.419256	<1E-15	0.417338	<1E-15	0.364593	<1E-15	0.442127	<1E-15	0.593163	<1E-15	0.0837386	0.0476283	0.47128	<1E-15	0.39839	<1E-15	0.466434	<1E-15	0.28554	5.74296e-12	0.246328	3.47518e-09	0.35936	<1E-15	0.143092	0.000683513	0.426407	<1E-15	0.428207	<1E-15	0.147466	0.000463451	0.280822	1.31253e-11
134	L_LDL_PL	0.0307815	0.467246	0.101768	0.01599	0.433502	<1E-15	0.379544	<1E-15	0.226361	6.12391e-08	0.240482	8.26732e-09	0.22428	8.13752e-08	0.409371	<1E-15	0.409589	<1E-15	0.362901	<1E-15	0.424061	<1E-15	0.580564	<1E-15	0.0875663	0.0383078	0.43895	<1E-15	0.379635	<1E-15	0.44837	<1E-15	0.283452	8.29536e-12	0.25328	1.20393e-09	0.364145	<1E-15	0.0955065	0.0238079	0.417153	<1E-15	0.417571	<1E-15	0.119181	0.0047412	0.283293	8.52918e-12
135	L_LDL_C	0.0260579	0.538311	0.103607	0.0141702	0.425543	<1E-15	0.401852	<1E-15	0.240318	8.46859e-09	0.228767	4.39283e-08	0.211146	4.59707e-07	0.421072	<1E-15	0.411798	<1E-15	0.362792	<1E-15	0.446024	<1E-15	0.583316	<1E-15	0.0756626	0.0736039	0.469565	<1E-15	0.399477	<1E-15	0.469028	<1E-15	0.28263	9.58011e-12	0.24188	6.73305e-09	0.356654	<1E-15	0.132092	0.00173257	0.420873	<1E-15	0.420957	<1E-15	0.148562	0.000419734	0.27331	4.73888e-11
136	L_LDL_CE	0.0146268	0.729811	0.0885649	0.0361476	0.426439	<1E-15	0.419073	<1E-15	0.230306	3.54505e-08	0.215661	2.56592e-07	0.202337	1.38274e-06	0.409123	<1E-15	0.403432	<1E-15	0.353889	<1E-15	0.442374	<1E-15	0.574834	<1E-15	0.0642243	0.129016	0.482164	<1E-15	0.393388	<1E-15	0.458124	<1E-15	0.268709	1.02061e-10	0.223649	8.86541e-08	0.333936	4.44089e-16	0.169722	5.4209e-05	0.413331	<1E-15	0.411187	<1E-15	0.159133	0.000155898	0.253392	1.18319e-09
137	L_LDL_FC	0.0627	0.138368	0.147318	0.000469659	0.414391	<1E-15	0.341853	<1E-15	0.262208	2.94403e-10	0.26313	2.53762e-10	0.23072	3.34576e-08	0.444391	<1E-15	0.425569	<1E-15	0.380215	<1E-15	0.446141	<1E-15	0.594715	<1E-15	0.112069	0.00794337	0.422494	<1E-15	0.40663	<1E-15	0.487884	<1E-15	0.318551	1.13243e-14	0.290235	2.48401e-12	0.413993	<1E-15	0.0226938	0.592026	0.431823	<1E-15	0.43995	<1E-15	0.121972	0.00384342	0.327741	1.77636e-15
138	L_LDL_TG	0.0672785	0.111757	0.0345607	0.414345	0.421155	<1E-15	0.380408	<1E-15	0.0800407	0.0583693	0.131624	0.00179985	0.20496	1.0011e-06	0.254478	9.99775e-10	0.322636	4.88498e-15	0.247179	3.05724e-09	0.274971	3.58e-11	0.48037	<1E-15	0.0841456	0.0465546	0.392066	<1E-15	0.280527	1.38138e-11	0.308132	8.79297e-14	0.184238	1.14537e-05	0.16119	0.000127616	0.221964	1.11299e-07	0.318271	1.19904e-14	0.305997	1.32783e-13	0.340933	<1E-15	0.13296	0.00161388	0.227696	5.09559e-08
139	M_LDL_P	-0.0553999	0.190508	-0.023373	0.580985	0.351464	<1E-15	0.427153	<1E-15	0.0727637	0.0853712	0.128525	0.00230895	0.146488	0.000505966	0.246798	3.23795e-09	0.255342	8.73797e-10	0.251006	1.70896e-09	0.320177	7.99361e-15	0.41496	<1E-15	-0.00552358	0.896234	0.370692	<1E-15	0.207841	6.98795e-07	0.237237	1.32476e-08	0.117103	0.00552816	0.0850587	0.0442193	0.140574	0.000850739	0.280789	1.32012e-11	0.24843	2.53053e-09	0.227549	5.20008e-08	0.0795136	0.0600522	0.0782772	0.0641581
140	M_LDL_L	-0.0467326	0.269581	0.01213	0.774558	0.406419	<1E-15	0.438235	<1E-15	0.148782	0.000411446	0.173408	3.69583e-05	0.170218	5.15079e-05	0.32566	2.66454e-15	0.343101	<1E-15	0.301406	3.17524e-13	0.372958	<1E-15	0.502769	<1E-15	0.00713131	0.866282	0.435374	<1E-15	0.296453	7.99361e-13	0.346305	<1E-15	0.175604	2.9307e-05	0.133243	0.00157676	0.219494	1.54864e-07	0.224952	7.42616e-08	0.342615	<1E-15	0.325791	2.66454e-15	0.111322	0.00837248	0.146796	0.000492197
141	M_LDL_PL	-0.0359636	0.395644	0.0250205	0.554613	0.411242	<1E-15	0.431526	<1E-15	0.157402	0.00018415	0.187575	7.87153e-06	0.182963	1.31941e-05	0.334282	4.44089e-16	0.355922	<1E-15	0.310543	5.50671e-14	0.373068	<1E-15	0.518278	<1E-15	0.00933711	0.825507	0.431079	<1E-15	0.305745	1.39444e-13	0.355215	<1E-15	0.186186	9.20918e-06	0.147794	0.000449915	0.236276	1.52127e-08	0.197474	2.48813e-06	0.350838	<1E-15	0.339016	<1E-15	0.0988928	0.0192455	0.163394	0.000102705
142	M_LDL_C	-0.0544803	0.197984	0.00754232	0.858654	0.392871	<1E-15	0.427241	<1E-15	0.149407	0.000388699	0.171233	4.63744e-05	0.160489	0.00013666	0.323002	4.44089e-15	0.33351	4.44089e-16	0.297757	6.27942e-13	0.372715	<1E-15	0.489279	<1E-15	0.00109043	0.979459	0.426228	<1E-15	0.290145	2.52465e-12	0.340953	<1E-15	0.169145	5.75155e-05	0.127536	0.00249742	0.214147	3.12446e-07	0.208185	6.69137e-07	0.337613	2.22045e-16	0.316216	1.82077e-14	0.103894	0.0139035	0.137699	0.00108755
143	M_LDL_CE	-0.0763904	0.0708673	-0.0230993	0.585424	0.385004	<1E-15	0.449299	<1E-15	0.123873	0.00332327	0.139693	0.000917653	0.146793	0.000492342	0.295236	1.00009e-12	0.30319	2.26708e-13	0.273257	4.78124e-11	0.359635	<1E-15	0.461841	<1E-15	-0.0148824	0.725278	0.435116	<1E-15	0.266381	1.49648e-10	0.30982	6.35048e-14	0.143424	0.000663923	0.0918158	0.0298185	0.16898	5.84973e-05	0.265814	1.64172e-10	0.308392	8.37108e-14	0.282459	9.86899e-12	0.120801	0.00419961	0.0954263	0.0239264
144	M_LDL_FC	0.0059362	0.888531	0.0820801	0.0522212	0.389883	<1E-15	0.351299	<1E-15	0.208335	6.5661e-07	0.240969	7.69813e-09	0.191723	4.8933e-06	0.376433	<1E-15	0.390534	<1E-15	0.344625	<1E-15	0.384739	<1E-15	0.532451	<1E-15	0.0399369	0.345504	0.382626	<1E-15	0.335966	4.44089e-16	0.405375	<1E-15	0.225062	7.31519e-08	0.212401	3.9138e-07	0.320796	7.10543e-15	0.0482572	0.25425	0.389275	<1E-15	0.381762	<1E-15	0.0531272	0.209371	0.235818	1.62479e-08
145	M_LDL_TG	0.00502452	0.905563	-0.0209783	0.62033	0.382248	<1E-15	0.442191	<1E-15	0.0435437	0.303659	0.0653482	0.122439	0.166467	7.55279e-05	0.207509	7.28527e-07	0.260342	3.96915e-10	0.198193	2.28329e-06	0.257729	6.00771e-10	0.4156	<1E-15	0.0382626	0.36612	0.425338	<1E-15	0.23596	1.59196e-08	0.246226	3.52864e-09	0.11915	0.00475211	0.0796963	0.0594645	0.1179	0.00521361	0.460911	<1E-15	0.228863	4.33454e-08	0.249962	2.0048e-09	0.181228	1.59716e-05	0.113221	0.00731968
146	S_LDL_P	0.00842359	0.842344	0.0413595	0.328581	0.368012	<1E-15	0.447485	<1E-15	0.0997743	0.0181908	0.132456	0.0016819	0.18661	8.77938e-06	0.291617	1.93534e-12	0.275474	3.28684e-11	0.272029	5.87626e-11	0.349271	<1E-15	0.459082	<1E-15	0.051844	0.220599	0.382318	<1E-15	0.233493	2.26337e-08	0.264398	2.06721e-10	0.18303	1.30967e-05	0.161849	0.000119627	0.214145	3.12505e-07	0.308063	8.92619e-14	0.245189	4.12124e-09	0.24421	4.76934e-09	0.120285	0.0043657	0.14887	0.000408156
147	S_LDL_L	-0.0445779	0.292308	0.00364745	0.93137	0.398957	<1E-15	0.441952	<1E-15	0.116648	0.00571552	0.183629	1.22562e-05	0.187849	7.63107e-06	0.314707	2.44249e-14	0.333356	4.44089e-16	0.306469	1.21236e-13	0.35724	<1E-15	0.504323	<1E-15	-0.00899928	0.831725	0.40318	<1E-15	0.268115	1.12579e-10	0.307886	9.23706e-14	0.151574	0.000318597	0.124786	0.00309692	0.195644	3.09251e-06	0.241567	7.05047e-09	0.297833	6.1906e-13	0.295216	1.00364e-12	0.080678	0.0563866	0.133255	0.00157531
148	S_LDL_PL	-0.0803858	0.0572888	-0.0406172	0.337343	0.398288	<1E-15	0.401651	<1E-15	0.0830224	0.0495683	0.22554	6.85261e-08	0.190032	5.94739e-06	0.30061	3.68594e-13	0.356642	<1E-15	0.318729	1.08802e-14	0.323395	4.21885e-15	0.50344	<1E-15	-0.0774481	0.0670388	0.354072	<1E-15	0.253786	1.11312e-09	0.291534	1.96487e-12	0.0851811	0.0439139	0.0848323	0.0447888	0.154484	0.000242901	0.184508	1.11135e-05	0.299498	4.54081e-13	0.306805	1.13687e-13	-0.0031446	0.940813	0.108958	0.00987021
149	S_LDL_C	-0.0240707	0.569745	0.0335906	0.427577	0.387147	<1E-15	0.428926	<1E-15	0.14186	0.000761117	0.182833	1.33852e-05	0.188521	7.06979e-06	0.327693	1.77636e-15	0.328606	1.33227e-15	0.310544	5.50671e-14	0.371542	<1E-15	0.505372	<1E-15	0.0216151	0.609755	0.398708	<1E-15	0.275026	3.54667e-11	0.321867	5.77316e-15	0.184111	1.16169e-05	0.153688	0.000261721	0.230456	3.47173e-08	0.204276	1.08947e-06	0.302649	2.51132e-13	0.296662	7.69163e-13	0.0895548	0.0341093	0.155942	0.000211646
150	S_LDL_CE	-0.000820315	0.984547	0.0495681	0.24156	0.388662	<1E-15	0.461714	<1E-15	0.142858	0.000697675	0.144736	0.0005914	0.188878	6.78723e-06	0.31223	3.95239e-14	0.297793	6.23501e-13	0.290061	2.56328e-12	0.37606	<1E-15	0.493424	<1E-15	0.056202	0.184158	0.419816	<1E-15	0.265908	1.61675e-10	0.309009	7.43849e-14	0.212227	4.00257e-07	0.164784	8.9435e-05	0.233742	2.18479e-08	0.269013	9.70695e-11	0.277946	2.15579e-11	0.270236	7.92431e-11	0.143754	0.000644925	0.157018	0.000191035
151	S_LDL_FC	-0.0705002	0.0955768	-0.00387478	0.927104	0.371591	<1E-15	0.326465	2.22045e-15	0.136702	0.00118294	0.260907	3.62652e-10	0.180125	1.80173e-05	0.339518	<1E-15	0.382764	<1E-15	0.340115	<1E-15	0.34161	<1E-15	0.49488	<1E-15	-0.0619554	0.143122	0.323563	3.9968e-15	0.281027	1.26652e-11	0.334562	4.44089e-16	0.113693	0.00707712	0.126384	0.0027342	0.216278	2.36715e-07	0.0405572	0.338059	0.348828	<1E-15	0.342845	<1E-15	-0.0369227	0.383156	0.153122	0.000275932
152	S_LDL_TG	-0.0695027	0.100374	-0.107995	0.0105454	0.258491	5.3266e-10	0.482982	<1E-15	-0.0275603	0.515135	-0.0995664	0.0184349	0.0731939	0.0835347	0.0893343	0.0345546	0.0745554	0.0779318	0.067528	0.110432	0.18427	1.14124e-05	0.230572	3.41559e-08	-0.00749305	0.859568	0.426875	<1E-15	0.130489	0.00197303	0.101734	0.0160253	0.0339364	0.422831	-0.0442572	0.295797	-0.0612892	0.147481	0.687429	<1E-15	0.0592619	0.161367	0.0553756	0.190703	0.295258	9.96092e-13	-0.0741089	0.0797345
153	XL_HDL_P	0.0599961	0.156228	0.131425	0.00182914	0.215265	2.70197e-07	0.0959513	0.0231597	0.280513	1.38471e-11	0.264801	1.93615e-10	0.242884	5.8065e-09	0.45604	<1E-15	0.347766	<1E-15	0.279454	1.66294e-11	0.343447	<1E-15	0.465977	<1E-15	0.108628	0.0100974	0.263253	2.48773e-10	0.394079	<1E-15	0.457563	<1E-15	0.202862	1.2966e-06	0.200188	1.79586e-06	0.304803	1.66978e-13	-0.0680041	0.107937	0.250177	1.93987e-09	0.352672	<1E-15	0.124694	0.00311906	0.288353	3.48299e-12
154	XL_HDL_L	0.0462502	0.274561	0.103135	0.014619	0.159347	0.000152697	0.0414279	0.327782	0.253781	1.114e-09	0.245871	3.72172e-09	0.227888	4.96155e-08	0.409963	<1E-15	0.301744	2.97984e-13	0.256401	7.40327e-10	0.29325	1.4384e-12	0.40379	<1E-15	0.0754544	0.0744025	0.199627	1.92181e-06	0.354588	<1E-15	0.403337	<1E-15	0.161873	0.000119353	0.163688	9.97535e-05	0.250347	1.89017e-09	-0.116001	0.0059918	0.19579	3.03946e-06	0.298723	5.24691e-13	0.0912939	0.0307654	0.246179	3.5537e-09
155	XL_HDL_PL	0.0350458	0.40782	0.0835178	0.0482196	0.130383	0.00198987	0.0247456	0.558972	0.239973	8.90607e-09	0.219003	1.65304e-07	0.210192	5.19092e-07	0.380776	<1E-15	0.265659	1.68385e-10	0.230968	3.23155e-08	0.270496	7.58948e-11	0.361981	<1E-15	0.0608528	0.15039	0.186471	8.91833e-06	0.338157	2.22045e-16	0.376172	<1E-15	0.142985	0.000689978	0.136844	0.00116883	0.213776	3.27811e-07	-0.107286	0.011069	0.16496	8.78743e-05	0.266308	1.51429e-10	0.101405	0.0163728	0.216693	2.24163e-07
156	XL_HDL_C	0.0549975	0.193754	0.124506	0.00316475	0.169268	5.67955e-05	0.0232102	0.583623	0.267623	1.2207e-10	0.283777	7.83551e-12	0.241289	7.34478e-09	0.430396	<1E-15	0.336938	2.22045e-16	0.27939	1.68154e-11	0.301672	3.01981e-13	0.428621	<1E-15	0.0820391	0.0523392	0.174672	3.23517e-05	0.354042	<1E-15	0.421376	<1E-15	0.171027	4.73746e-05	0.188312	7.2393e-06	0.288125	3.62776e-12	-0.184926	1.06076e-05	0.22191	1.12111e-07	0.326137	2.44249e-15	0.0484785	0.252076	0.277701	2.2482e-11
157	XL_HDL_CE	0.065221	0.12317	0.146657	0.00049839	0.160839	0.000132074	0.0408736	0.3343	0.303663	2.0739e-13	0.262187	2.95404e-10	0.236826	1.40567e-08	0.444113	<1E-15	0.326403	2.22045e-15	0.276105	2.95284e-11	0.324572	3.33067e-15	0.437999	<1E-15	0.0974345	0.0211074	0.197991	2.33914e-06	0.369841	<1E-15	0.441261	<1E-15	0.196005	2.96292e-06	0.197806	2.3914e-06	0.304417	1.79634e-13	-0.182114	1.44915e-05	0.221486	1.1868e-07	0.328225	1.55431e-15	0.0752148	0.07533	0.287147	4.31832e-12
158	XL_HDL_FC	0.00395665	0.925568	0.0256476	0.544729	0.179793	1.86806e-05	-0.0436368	0.302626	0.126374	0.00273635	0.339997	<1E-15	0.237829	1.21629e-08	0.342706	<1E-15	0.342408	<1E-15	0.267331	1.2807e-10	0.190365	5.72361e-06	0.35603	<1E-15	0.0117698	0.781081	0.078645	0.0629135	0.269021	9.69302e-11	0.314706	2.44249e-14	0.061589	0.145507	0.130175	0.00202344	0.200517	1.72571e-06	-0.187676	7.7822e-06	0.200597	1.70889e-06	0.288615	3.32312e-12	-0.0551177	0.19278	0.212897	3.67189e-07
159	XL_HDL_TG	0.0437862	0.300971	0.0307556	0.467621	0.30254	2.56239e-13	0.4144	<1E-15	0.096895	0.0218348	0.00302577	0.943045	0.13832	0.00103176	0.239506	9.53418e-09	0.193684	3.8943e-06	0.148962	0.000404761	0.287863	3.80096e-12	0.350912	<1E-15	0.107328	0.0110374	0.470188	<1E-15	0.284293	7.1565e-12	0.290723	2.27485e-12	0.166294	7.68562e-05	0.114317	0.00676769	0.142305	0.000732178	0.58492	<1E-15	0.170785	4.85769e-05	0.215272	2.69956e-07	0.330681	8.88178e-16	0.128537	0.00230672
160	L_HDL_P	0.0672099	0.112124	0.188922	6.75353e-06	0.151509	0.000320517	0.0659899	0.118803	0.399791	<1E-15	0.173379	3.70725e-05	0.189054	6.65194e-06	0.470647	<1E-15	0.303668	2.06946e-13	0.219829	1.48115e-07	0.378754	<1E-15	0.412881	<1E-15	0.172347	4.13009e-05	0.313855	2.88658e-14	0.43454	<1E-15	0.523929	<1E-15	0.276013	2.99933e-11	0.212091	4.07297e-07	0.348087	<1E-15	-0.124587	0.00314498	0.258863	5.02136e-10	0.356716	<1E-15	0.236386	1.49754e-08	0.307445	1.00586e-13
161	L_HDL_L	0.0531898	0.208834	0.17056	4.97227e-05	0.158788	0.000161182	0.0564782	0.182008	0.397805	<1E-15	0.180551	1.72008e-05	0.187927	7.56333e-06	0.467793	<1E-15	0.311283	4.77396e-14	0.220611	1.33432e-07	0.377353	<1E-15	0.410578	<1E-15	0.158629	0.000163679	0.3208	7.10543e-15	0.444237	<1E-15	0.529942	<1E-15	0.270181	7.99827e-11	0.201845	1.46824e-06	0.339221	<1E-15	-0.131767	0.00177901	0.275651	3.18985e-11	0.37065	<1E-15	0.240434	8.32548e-09	0.303198	2.26485e-13
162	L_HDL_PL	0.0287261	0.497516	0.1447	0.000593299	0.177566	2.37658e-05	0.0659303	0.119137	0.397193	<1E-15	0.176876	2.55913e-05	0.181378	1.57124e-05	0.467854	<1E-15	0.320652	7.54952e-15	0.218165	1.84687e-07	0.388141	<1E-15	0.413979	<1E-15	0.141659	0.000774508	0.353766	<1E-15	0.463537	<1E-15	0.544893	<1E-15	0.264531	2.02277e-10	0.183685	1.21794e-05	0.323215	4.44089e-15	-0.111897	0.00804011	0.300096	4.05898e-13	0.38891	<1E-15	0.263279	2.47752e-10	0.290174	2.51155e-12
163	L_HDL_C	0.0680508	0.107694	0.188098	7.41781e-06	0.120991	0.00413988	0.0215807	0.610323	0.393043	<1E-15	0.186115	9.28347e-06	0.190115	5.89094e-06	0.459251	<1E-15	0.296239	8.31335e-13	0.220693	1.31975e-07	0.351631	<1E-15	0.39125	<1E-15	0.158276	0.000169337	0.259352	4.64692e-10	0.409862	<1E-15	0.50196	<1E-15	0.258566	5.26303e-10	0.207793	7.03e-07	0.343529	<1E-15	-0.1931	4.16915e-06	0.240415	8.34882e-09	0.340562	<1E-15	0.190054	5.93219e-06	0.304017	1.93623e-13
164	L_HDL_CE	0.0768748	0.0690924	0.199056	2.05849e-06	0.103619	0.0141594	0.0109197	0.796533	0.394736	<1E-15	0.176453	2.67738e-05	0.18459	1.10131e-05	0.450648	<1E-15	0.282898	9.14091e-12	0.212048	4.09538e-07	0.340487	<1E-15	0.376827	<1E-15	0.164681	9.0362e-05	0.24148	7.14223e-09	0.396679	<1E-15	0.492496	<1E-15	0.259267	4.71007e-10	0.20998	5.33305e-07	0.345664	<1E-15	-0.210164	5.20935e-07	0.225574	6.82086e-08	0.326427	2.22045e-15	0.183108	1.29848e-05	0.30367	2.06946e-13
165	L_HDL_FC	0.0437044	0.301876	0.150503	0.000351605	0.183479	1.24612e-05	0.0629121	0.137037	0.374828	<1E-15	0.216481	2.30503e-07	0.209201	5.88646e-07	0.47979	<1E-15	0.336698	2.22045e-16	0.248614	2.46087e-09	0.38272	<1E-15	0.439689	<1E-15	0.137473	0.00110848	0.316929	1.55431e-14	0.449736	<1E-15	0.527629	<1E-15	0.256118	7.73879e-10	0.200801	1.66719e-06	0.333599	4.44089e-16	-0.130193	0.00202051	0.286906	4.50751e-12	0.382884	<1E-15	0.213381	3.44979e-07	0.302767	2.45581e-13
166	L_HDL_TG	0.0666962	0.114899	0.102342	0.0154012	0.311395	4.66294e-14	0.32123	6.66134e-15	0.215281	2.69643e-07	0.0151483	0.720573	0.127316	0.00254114	0.304904	1.63647e-13	0.237551	1.26611e-08	0.13825	0.00103795	0.357186	<1E-15	0.355415	<1E-15	0.187066	8.33894e-06	0.533032	<1E-15	0.405431	<1E-15	0.429761	<1E-15	0.283362	8.42681e-12	0.182856	1.33521e-05	0.253914	1.09131e-09	0.445502	<1E-15	0.296802	7.49178e-13	0.334937	4.44089e-16	0.443937	<1E-15	0.237484	1.27842e-08
167	M_HDL_P	-0.0159628	0.706226	0.121237	0.00406361	0.202755	1.31361e-06	0.153499	0.000266384	0.419143	<1E-15	0.0562998	0.183395	0.108073	0.0104893	0.441499	<1E-15	0.28069	1.34288e-11	0.160961	0.000130511	0.41388	<1E-15	0.373847	<1E-15	0.158319	0.000168634	0.481924	<1E-15	0.463127	<1E-15	0.569822	<1E-15	0.295214	1.00409e-12	0.146307	0.000514262	0.312265	3.95239e-14	-0.0069436	0.86977	0.353254	<1E-15	0.392943	<1E-15	0.368238	<1E-15	0.234095	2.07781e-08
168	M_HDL_L	-0.0288522	0.495629	0.100538	0.0173183	0.209086	5.97225e-07	0.163858	9.80849e-05	0.407357	<1E-15	0.0439924	0.298699	0.100827	0.0169981	0.426717	<1E-15	0.272893	5.08318e-11	0.151839	0.000310867	0.409967	<1E-15	0.364148	<1E-15	0.147477	0.000462992	0.498156	<1E-15	0.460763	<1E-15	0.561749	<1E-15	0.285501	5.78293e-12	0.128214	0.00236678	0.289788	2.69251e-12	0.0222095	0.599957	0.35567	<1E-15	0.389736	<1E-15	0.383066	<1E-15	0.216656	2.25283e-07
169	M_HDL_PL	-0.0508923	0.229201	0.0699135	0.0983752	0.215024	2.78808e-07	0.187313	8.1093e-06	0.387197	<1E-15	0.0198757	0.638827	0.0883165	0.0366749	0.408034	<1E-15	0.255341	8.73876e-10	0.135331	0.00132667	0.409906	<1E-15	0.348627	<1E-15	0.1313	0.0018477	0.526461	<1E-15	0.457776	<1E-15	0.547761	<1E-15	0.271104	6.85825e-11	0.101393	0.0163855	0.25431	1.02611e-09	0.0798245	0.0590549	0.349843	<1E-15	0.375029	<1E-15	0.411592	<1E-15	0.185198	1.02894e-05
170	M_HDL_C	-0.00577227	0.89159	0.136442	0.00120901	0.176243	2.73815e-05	0.101667	0.0160955	0.429761	<1E-15	0.0877596	0.0378811	0.118335	0.00504847	0.445154	<1E-15	0.289909	2.63456e-12	0.175035	3.11305e-05	0.39256	<1E-15	0.37121	<1E-15	0.153169	0.000274723	0.417818	<1E-15	0.448125	<1E-15	0.56371	<1E-15	0.286618	4.74443e-12	0.154751	0.000236862	0.327445	1.77636e-15	-0.111265	0.0084059	0.348307	<1E-15	0.395728	<1E-15	0.30988	6.26166e-14	0.250256	1.91676e-09
171	M_HDL_CE	-0.00199247	0.962477	0.141207	0.000805444	0.155951	0.00021146	0.0812877	0.0545425	0.424794	<1E-15	0.0803257	0.0574756	0.109522	0.00949301	0.431089	<1E-15	0.274593	3.81666e-11	0.163371	0.000102946	0.373947	<1E-15	0.349583	<1E-15	0.154377	0.000245347	0.392269	<1E-15	0.430637	<1E-15	0.546474	<1E-15	0.281456	1.1755e-11	0.151866	0.000310084	0.322441	5.10703e-15	-0.135319	0.00132809	0.334557	4.44089e-16	0.381103	<1E-15	0.29677	7.53619e-13	0.24589	3.71126e-09
172	M_HDL_FC	-0.0170587	0.687089	0.118798	0.00487829	0.248978	2.32865e-09	0.183879	1.19206e-05	0.432122	<1E-15	0.110645	0.008779	0.147184	0.000475354	0.487301	<1E-15	0.340032	<1E-15	0.214596	2.94771e-07	0.456009	<1E-15	0.448959	<1E-15	0.144495	0.000604119	0.510674	<1E-15	0.505443	<1E-15	0.615536	<1E-15	0.30238	2.64233e-13	0.16313	0.000105432	0.337402	2.22045e-16	-0.0104216	0.805624	0.393349	<1E-15	0.442896	<1E-15	0.35575	<1E-15	0.262548	2.78742e-10
173	M_HDL_TG	-0.0451593	0.286053	-0.0466838	0.270083	0.24464	4.47326e-09	0.392805	<1E-15	0.0702252	0.0968806	-0.164936	8.80855e-05	0.0221083	0.601619	0.106209	0.0119082	0.0513833	0.224734	0.00291665	0.945096	0.238224	1.1487e-08	0.169016	5.82799e-05	0.0906054	0.0320541	0.526709	<1E-15	0.24281	5.87032e-09	0.216694	2.24137e-07	0.165161	8.61274e-05	0.0155383	0.713691	0.0250725	0.55379	0.641507	<1E-15	0.17177	4.38588e-05	0.141928	0.000756609	0.475059	<1E-15	0.0143824	0.734153
174	S_HDL_P	-0.0602201	0.154685	0.0714222	0.0913079	0.266318	1.51204e-10	0.265247	1.80062e-10	0.301123	3.34843e-13	0.0365805	0.387584	0.0530609	0.209941	0.339519	<1E-15	0.268579	1.04271e-10	0.162622	0.000110862	0.375733	<1E-15	0.360289	<1E-15	0.0879491	0.037467	0.484189	<1E-15	0.357191	<1E-15	0.463896	<1E-15	0.240933	7.73882e-09	0.108743	0.0100179	0.256879	6.86757e-10	0.0527086	0.212988	0.368226	<1E-15	0.351438	<1E-15	0.250866	1.74602e-09	0.152289	0.000298182
175	S_HDL_L	-0.102951	0.0147971	0.0148758	0.725395	0.283286	8.53984e-12	0.302492	2.58682e-13	0.286884	4.52482e-12	-0.01292	0.76031	0.0373135	0.378138	0.325924	2.66454e-15	0.242294	6.33507e-09	0.126506	0.00270834	0.393192	<1E-15	0.343253	<1E-15	0.071002	0.0932343	0.569594	<1E-15	0.379091	<1E-15	0.471265	<1E-15	0.222467	1.04016e-07	0.0508716	0.229391	0.192907	4.26432e-06	0.185259	1.0219e-05	0.363608	<1E-15	0.343821	<1E-15	0.350622	<1E-15	0.104292	0.0135405
176	S_HDL_PL	-0.140496	0.00085648	-0.0301773	0.476037	0.270433	7.66982e-11	0.296071	8.57536e-13	0.272051	5.85487e-11	-0.0407744	0.335476	0.0204048	0.629921	0.311493	4.57412e-14	0.216078	2.42997e-07	0.100492	0.0173694	0.390756	<1E-15	0.313237	3.24185e-14	0.0421248	0.319703	0.593071	<1E-15	0.382443	<1E-15	0.465407	<1E-15	0.196273	2.87044e-06	0.00339913	0.936032	0.141287	0.000799935	0.221208	1.23199e-07	0.348653	<1E-15	0.326993	1.9984e-15	0.391681	<1E-15	0.0633032	0.134607
177	S_HDL_C	-0.0321283	0.447977	0.105393	0.0125803	0.251405	1.60744e-09	0.234168	2.05637e-08	0.326556	2.22045e-15	0.0546786	0.196354	0.0667129	0.114808	0.35627	<1E-15	0.281892	1.08953e-11	0.177698	2.34306e-05	0.373791	<1E-15	0.374201	<1E-15	0.106511	0.0116671	0.451991	<1E-15	0.36235	<1E-15	0.478167	<1E-15	0.260788	3.69641e-10	0.137275	0.00112717	0.293268	1.43396e-12	-0.0124044	0.769602	0.373914	<1E-15	0.367357	<1E-15	0.228325	4.6707e-08	0.188001	7.49995e-06
178	S_HDL_CE	-0.0400243	0.344449	0.0995761	0.0184234	0.195576	3.11722e-06	0.18221	1.43383e-05	0.299843	4.2566e-13	0.0309442	0.464893	0.0366305	0.386934	0.303574	2.1072e-13	0.230391	3.50356e-08	0.13674	0.00117918	0.317124	1.5099e-14	0.29994	4.17888e-13	0.095332	0.0240664	0.381704	<1E-15	0.303344	2.20268e-13	0.412522	<1E-15	0.233463	2.27303e-08	0.11524	0.00633163	0.259947	4.22705e-10	-0.0664377	0.116316	0.327252	1.77636e-15	0.312437	3.81917e-14	0.190668	5.52774e-06	0.154791	0.000235963
179	S_HDL_FC	-0.0122361	0.77264	0.105782	0.0122558	0.391015	<1E-15	0.359364	<1E-15	0.354327	<1E-15	0.113029	0.0074206	0.147492	0.000462351	0.459559	<1E-15	0.39387	<1E-15	0.266871	1.38105e-10	0.488027	<1E-15	0.546374	<1E-15	0.126517	0.00270603	0.60609	<1E-15	0.487931	<1E-15	0.598793	<1E-15	0.309938	6.21725e-14	0.184605	1.09938e-05	0.348785	<1E-15	0.140058	0.000889358	0.466351	<1E-15	0.482805	<1E-15	0.308755	7.81597e-14	0.263878	2.24897e-10
180	S_HDL_TG	-0.0910712	0.0311774	-0.13177	0.0017785	0.228072	4.83704e-08	0.428088	<1E-15	-0.0658966	0.119327	-0.172916	3.89161e-05	-0.00326575	0.938537	-0.0162269	0.701597	0.00508377	0.904455	-0.0177073	0.675854	0.124796	0.00309457	0.108511	0.0101787	-0.0155602	0.713306	0.418104	<1E-15	0.0951479	0.0243418	0.0416852	0.324783	0.0194962	0.645245	-0.083331	0.0487244	-0.11591	0.00603138	0.681175	<1E-15	0.081543	0.0537854	0.0327372	0.439415	0.313845	2.88658e-14	-0.113241	0.0073092
181	XXL_VLDL_PL_pct	0.443895	<1E-15	0.401469	<1E-15	-0.159998	0.000356788	-0.0804804	0.0739158	0.0313644	0.486733	-0.14067	0.00172311	0.0613736	0.173222	-0.193779	1.443e-05	-0.229405	2.5394e-07	-0.0627297	0.163899	-0.100397	0.0256528	-0.0522567	0.246329	0.388701	<1E-15	-0.258862	5.25978e-09	-0.173901	0.000102331	-0.186614	2.99421e-05	0.294368	2.48028e-11	0.316813	5.58664e-13	0.253318	1.13379e-08	-0.16928	0.000156688	-0.229965	2.36991e-07	-0.182565	4.46913e-05	-0.0471599	0.295511	0.261002	3.89155e-09
182	XXL_VLDL_C_pct	0.444977	<1E-15	0.44509	<1E-15	0.0347841	0.440476	-0.0694518	0.123172	0.143012	0.00143784	0.0844923	0.060582	0.137986	0.00211328	0.0174317	0.699137	0.0384259	0.394098	0.117357	0.0090328	0.0609532	0.17619	0.156716	0.000472327	0.364256	<1E-15	-0.154216	0.000582712	-0.0214954	0.633644	0.0517761	0.250706	0.419019	<1E-15	0.45412	<1E-15	0.488336	<1E-15	-0.356166	4.44089e-16	0.0291384	0.518195	0.086635	0.054317	-0.0520835	0.2479	0.475389	<1E-15
183	XXL_VLDL_CE_pct	0.463434	<1E-15	0.462546	<1E-15	0.126157	0.00498326	0.00130364	0.976943	0.150669	0.000780828	0.119519	0.00783126	0.181518	4.95004e-05	0.0651626	0.148127	0.102716	0.022416	0.158146	0.000418245	0.0965925	0.0318365	0.216091	1.24652e-06	0.381554	<1E-15	-0.0890505	0.0479103	0.0187371	0.677825	0.0850707	0.0588346	0.458826	<1E-15	0.50575	<1E-15	0.538459	<1E-15	-0.274072	5.82379e-10	0.0948457	0.0350773	0.143726	0.00135989	-0.0128842	0.775144	0.527252	<1E-15
184	XXL_VLDL_FC_pct	0.385362	<1E-15	0.382795	<1E-15	-0.113266	0.0117624	-0.165991	0.000210791	0.114394	0.0109451	0.0175523	0.697157	0.0743063	0.0990169	-0.0513114	0.25499	-0.0786294	0.0808279	0.0391315	0.385465	-0.00875837	0.846039	0.046703	0.30022	0.326248	1.02807e-13	-0.242444	4.85449e-08	-0.0846924	0.0599728	-0.0372424	0.408836	0.322032	2.20712e-13	0.343003	4.44089e-15	0.356317	4.44089e-16	-0.417168	<1E-15	-0.0935506	0.0376579	-0.0287489	0.523806	-0.0982019	0.0290805	0.339114	9.32587e-15
185	XXL_VLDL_TG_pct	-0.4618	<1E-15	-0.448927	<1E-15	0.0198403	0.660011	0.0767121	0.0885299	-0.123726	0.00589491	-0.0305539	0.498069	-0.119104	0.00805029	0.0307001	0.496013	0.0287569	0.523691	-0.0819364	0.068824	-0.0278401	0.537018	-0.107148	0.0172048	-0.388905	<1E-15	0.178041	6.92147e-05	0.0549756	0.222571	3.74772e-05	0.999337	-0.409351	<1E-15	-0.439486	<1E-15	-0.454219	<1E-15	0.326363	1.00586e-13	0.0288881	0.521798	-0.0282364	0.531237	0.0509573	0.258288	-0.440007	<1E-15
186	XL_VLDL_PL_pct	0.0393645	0.355072	-0.0486829	0.252644	0.00177197	0.966807	0.258072	7.03491e-10	-0.169074	6.35112e-05	-0.197536	2.797e-06	-0.0130436	0.759353	-0.185535	1.10604e-05	-0.230481	4.0959e-08	-0.0848415	0.0459317	-0.0439264	0.30204	-0.0556586	0.190838	0.0506143	0.234286	0.0402016	0.344925	-0.180166	1.9903e-05	-0.241472	8.60642e-09	0.023776	0.576546	-0.0217651	0.609216	-0.133607	0.00162278	0.443233	<1E-15	-0.294543	1.4988e-12	-0.284034	9.68958e-12	0.119169	0.00497606	-0.121739	0.00410993
187	XL_VLDL_C_pct	0.354317	<1E-15	0.357782	<1E-15	0.0682524	0.108557	-0.0704991	0.0973845	0.101905	0.0164228	0.149102	0.000429569	0.175086	3.41632e-05	0.0912027	0.0318505	0.0784363	0.06506	0.173385	4.08031e-05	0.0518486	0.223059	0.210125	6.02523e-07	0.261343	4.20366e-10	-0.176704	2.88078e-05	0.0104747	0.805686	0.0619276	0.145473	0.323534	5.77316e-15	0.400576	<1E-15	0.416141	<1E-15	-0.394114	<1E-15	0.0327223	0.442097	0.0889518	0.0363404	-0.185491	1.11147e-05	0.404011	<1E-15
188	XL_VLDL_CE_pct	0.346044	<1E-15	0.365769	<1E-15	0.0917152	0.0308972	-0.105767	0.0127446	0.131115	0.00198491	0.194801	3.85545e-06	0.180582	1.9028e-05	0.122893	0.00376747	0.135832	0.00135183	0.195572	3.52328e-06	0.0635028	0.135487	0.23198	3.32584e-08	0.257358	7.86411e-10	-0.170634	5.41834e-05	0.0463178	0.276457	0.111964	0.00834779	0.331819	8.88178e-16	0.417865	<1E-15	0.456822	<1E-15	-0.464151	<1E-15	0.104634	0.01374	0.158171	0.000185461	-0.198562	2.47698e-06	0.438485	<1E-15
189	XL_VLDL_FC_pct	0.317113	2.08722e-14	0.273531	5.79572e-11	-0.0439533	0.301745	0.0456782	0.28315	-0.0104104	0.806855	-0.0593077	0.163314	0.0719023	0.0908856	-0.0747618	0.0787184	-0.155673	0.000234813	-0.000703954	0.98681	-0.0188713	0.65761	0.053565	0.208093	0.253668	1.3913e-09	-0.177296	2.70574e-05	-0.136288	0.00130172	-0.123683	0.00354787	0.26169	3.97852e-10	0.286642	6.14175e-12	0.227282	6.35789e-08	-0.0724064	0.0886374	-0.210348	5.85854e-07	-0.159638	0.000161179	-0.0765958	0.0716357	0.221418	1.39984e-07
190	XL_VLDL_TG_pct	-0.345229	<1E-15	-0.323664	5.77316e-15	-0.0722807	0.0891937	-0.0210539	0.620964	-0.0565072	0.184152	-0.0871583	0.040293	-0.157606	0.000195684	-0.0371998	0.382171	-0.0160819	0.705659	-0.131753	0.00188583	-0.0414306	0.330366	-0.188329	8.09217e-06	-0.259974	5.21925e-10	0.140523	0.000911504	0.0352035	0.40825	-0.00281352	0.94732	-0.313651	4.13003e-14	-0.370812	<1E-15	-0.356772	<1E-15	0.236462	1.76941e-08	0.027339	0.520776	-0.0203524	0.632647	0.137634	0.00116354	-0.350202	<1E-15
191	L_VLDL_PL_pct	0.150678	0.000345991	0.021625	0.609591	0.0680037	0.107939	0.163753	9.91095e-05	-0.165251	8.53466e-05	-0.150433	0.000353864	0.0296201	0.484223	-0.197487	2.48433e-06	-0.145788	0.000538622	-0.0744302	0.0784341	-0.115349	0.00628207	-0.0404965	0.338783	0.129056	0.0022133	-0.00895363	0.832565	-0.184509	1.11126e-05	-0.242187	6.43599e-09	0.0902791	0.0326808	0.0664543	0.116225	-0.0350578	0.407659	0.350424	<1E-15	-0.156566	0.000199441	-0.157153	0.000188583	0.0521224	0.218127	0.0157183	0.710523
192	L_VLDL_C_pct	0.376522	<1E-15	0.335786	4.44089e-16	0.116959	0.00558711	-0.00399539	0.924841	0.0768645	0.0691296	0.0994698	0.0185493	0.163423	0.000102416	0.0479115	0.257673	0.0631658	0.135456	0.153483	0.000266796	0.0258322	0.541838	0.206896	7.86652e-07	0.283486	8.24629e-12	-0.118331	0.00505003	0.00462164	0.913104	0.0323607	0.444698	0.351872	<1E-15	0.415586	<1E-15	0.401763	<1E-15	-0.20763	7.17495e-07	0.0489337	0.247645	0.0964324	0.0224759	-0.119441	0.00465041	0.400765	<1E-15
193	L_VLDL_CE_pct	0.351178	<1E-15	0.326138	2.44249e-15	0.14297	0.000690903	0.0157134	0.710609	0.0991875	0.018887	0.12665	0.00267785	0.184594	1.10084e-05	0.102456	0.0152862	0.102695	0.015049	0.190663	5.53096e-06	0.0802696	0.0576507	0.259809	4.32128e-10	0.256767	6.99032e-10	-0.0762735	0.071301	0.0553422	0.190971	0.0906213	0.0320238	0.355075	<1E-15	0.417915	<1E-15	0.415948	<1E-15	-0.222092	1.09395e-07	0.0824522	0.0511599	0.135216	0.00133944	-0.116646	0.0057162	0.411637	<1E-15
194	L_VLDL_FC_pct	0.377908	<1E-15	0.302702	2.4869e-13	0.0346109	0.413667	-0.0335561	0.428051	0.00486941	0.908465	0.0231336	0.584865	0.0971317	0.0215131	-0.0750196	0.0760926	-0.0381691	0.367292	0.0504046	0.2337	-0.0901967	0.0328406	0.074237	0.0792137	0.293734	1.31672e-12	-0.191466	5.04125e-06	-0.108965	0.00986537	-0.10408	0.013733	0.288312	3.5083e-12	0.350159	<1E-15	0.31067	5.37348e-14	-0.144215	0.000619262	-0.0463597	0.273425	-0.0161569	0.702823	-0.118345	0.00504495	0.314214	2.68674e-14
195	L_VLDL_TG_pct	-0.345477	<1E-15	-0.272922	5.05884e-11	-0.113395	0.00722936	-0.0519588	0.219578	-0.00889849	0.833582	-0.0186809	0.659125	-0.128029	0.00240186	0.0301206	0.476866	0.0033006	0.937882	-0.0775866	0.0665503	0.0250493	0.554157	-0.142606	0.000713214	-0.267435	1.25906e-10	0.0941679	0.0258543	0.0626064	0.138959	0.0557238	0.187925	-0.304855	1.65201e-13	-0.344611	<1E-15	-0.301645	3.03535e-13	0.0449254	0.288559	0.0105792	0.802745	-0.0272272	0.520229	0.0828919	0.0499288	-0.321238	6.66134e-15
196	M_VLDL_PL_pct	0.221474	1.1888e-07	0.204733	1.02965e-06	0.27298	5.00946e-11	0.142605	0.000713257	0.126083	0.00279956	0.1959	3.00015e-06	0.240829	7.85796e-09	0.238655	1.07907e-08	0.234592	1.93594e-08	0.285875	5.41212e-12	0.209542	5.6376e-07	0.408424	<1E-15	0.188781	6.86275e-06	0.110922	0.00861057	0.17321	3.77348e-05	0.219918	1.46356e-07	0.325031	3.10862e-15	0.353124	<1E-15	0.397464	<1E-15	-0.097167	0.0214654	0.204649	1.04042e-06	0.239267	9.87252e-09	-0.0547967	0.195388	0.356531	<1E-15
197	M_VLDL_C_pct	0.244278	4.72152e-09	0.274042	4.18874e-11	0.200458	1.73808e-06	-0.00885694	0.834347	0.17766	2.35272e-05	0.250594	1.82028e-09	0.221258	1.22364e-07	0.265745	1.66029e-10	0.253809	1.10929e-09	0.286834	4.56613e-12	0.194863	3.39067e-06	0.376064	<1E-15	0.207611	7.19252e-07	0.00179807	0.966136	0.182322	1.41625e-05	0.255685	8.28226e-10	0.34124	<1E-15	0.397975	<1E-15	0.466196	<1E-15	-0.336276	4.44089e-16	0.218902	1.67524e-07	0.266582	1.44805e-10	-0.114666	0.0065998	0.414197	<1E-15
198	M_VLDL_CE_pct	0.249161	2.26485e-09	0.282695	9.47109e-12	0.180549	1.72042e-05	-0.0381428	0.367623	0.18508	1.04257e-05	0.253372	1.18698e-09	0.216854	2.19486e-07	0.263053	2.56943e-10	0.246543	3.36466e-09	0.2772	2.44946e-11	0.186414	8.97524e-06	0.360687	<1E-15	0.213614	3.34767e-07	-0.0205339	0.627757	0.174478	3.30198e-05	0.249273	2.22651e-09	0.342037	<1E-15	0.398361	<1E-15	0.469513	<1E-15	-0.36997	<1E-15	0.212248	3.99152e-07	0.261332	3.38849e-10	-0.118686	0.00491889	0.415876	<1E-15
199	M_VLDL_FC_pct	0.230385	3.50644e-08	0.248845	2.37621e-09	0.245992	3.65478e-09	0.0726501	0.0858615	0.1564	0.00020262	0.232676	2.54076e-08	0.22675	5.80474e-08	0.263027	2.5803e-10	0.263161	2.52512e-10	0.303021	2.34035e-13	0.21277	3.73265e-07	0.406964	<1E-15	0.189673	6.19768e-06	0.0611094	0.148674	0.197915	2.3606e-06	0.264908	1.90282e-10	0.329406	1.33227e-15	0.386219	<1E-15	0.445868	<1E-15	-0.23856	1.09404e-08	0.231403	3.04012e-08	0.275771	3.12537e-11	-0.103142	0.0146127	0.401289	<1E-15
200	M_VLDL_TG_pct	-0.242041	6.57617e-09	-0.261023	3.56024e-10	-0.219779	1.49097e-07	-0.0285041	0.500845	-0.168171	6.35387e-05	-0.240757	7.94103e-09	-0.229441	4.00023e-08	-0.264406	2.06438e-10	-0.252633	1.33062e-09	-0.291659	1.92069e-12	-0.200802	1.6669e-06	-0.390238	<1E-15	-0.204921	1.00598e-06	-0.028426	0.50202	-0.182191	1.43678e-05	-0.251146	1.6727e-09	-0.341699	<1E-15	-0.39244	<1E-15	-0.455887	<1E-15	0.283383	8.39595e-12	-0.217183	2.1021e-07	-0.262129	2.98158e-10	0.102598	0.0151443	-0.405754	<1E-15
201	S_VLDL_PL_pct	0.132012	0.0017439	0.192872	4.28157e-06	0.19387	3.81034e-06	0.0446385	0.291652	0.182497	1.38915e-05	0.260842	3.66458e-10	0.215135	2.74792e-07	0.290922	2.19447e-12	0.255693	8.2712e-10	0.304149	1.8896e-13	0.236548	1.46293e-08	0.379968	<1E-15	0.120238	0.00438118	0.038058	0.368689	0.182693	1.35949e-05	0.250944	1.7253e-09	0.269148	9.49265e-11	0.304888	1.64313e-13	0.381846	<1E-15	-0.322837	4.88498e-15	0.221534	1.17913e-07	0.240873	7.80712e-09	-0.114987	0.00644852	0.30385	1.9984e-13
202	S_VLDL_C_pct	0.272569	5.36717e-11	0.289486	2.84239e-12	0.182883	1.33116e-05	-0.0620889	0.142261	0.108225	0.0103808	0.25621	7.62822e-10	0.209449	5.70428e-07	0.166685	7.38812e-05	0.214023	3.17518e-07	0.244632	4.47868e-09	0.10717	0.0111565	0.287709	3.9071e-12	0.226656	5.88043e-08	-0.10771	0.0107535	0.0827168	0.0504161	0.1437	0.000648003	0.325708	2.66454e-15	0.410571	<1E-15	0.453261	<1E-15	-0.377084	<1E-15	0.186293	9.09912e-06	0.213925	3.21564e-07	-0.174227	3.39078e-05	0.417677	<1E-15
203	S_VLDL_CE_pct	0.325656	2.66454e-15	0.313169	3.28626e-14	0.161431	0.000124647	-0.108015	0.0105313	0.0612085	0.148015	0.236374	1.50019e-08	0.1933	4.07305e-06	0.0905512	0.0321574	0.17086	4.8204e-05	0.196296	2.8625e-06	0.0256695	0.544386	0.223736	8.7617e-08	0.264938	1.89353e-10	-0.180205	1.7861e-05	0.0175634	0.67834	0.0653673	0.122329	0.336743	2.22045e-16	0.436759	<1E-15	0.45535	<1E-15	-0.368956	<1E-15	0.14923	0.00039501	0.175415	2.99011e-05	-0.187237	8.17922e-06	0.4423	<1E-15
204	S_VLDL_FC_pct	0.135354	0.00132421	0.206605	8.15806e-07	0.193398	4.02678e-06	0.0198414	0.639405	0.182857	1.33508e-05	0.258166	5.60726e-10	0.199778	1.88699e-06	0.281897	1.0886e-11	0.260419	3.92095e-10	0.292099	1.77347e-12	0.233774	2.17489e-08	0.363737	<1E-15	0.130463	0.00197714	0.0303001	0.474242	0.183399	1.25721e-05	0.265771	1.65326e-10	0.267216	1.30505e-10	0.309579	6.66134e-14	0.393183	<1E-15	-0.345972	<1E-15	0.231623	2.94742e-08	0.256112	7.74683e-10	-0.126711	0.002665	0.319763	8.88178e-15
205	S_VLDL_TG_pct	-0.241948	6.66676e-09	-0.270827	7.18288e-11	-0.190259	5.79398e-06	0.0341698	0.419647	-0.12848	0.00231726	-0.261788	3.14963e-10	-0.215836	2.50779e-07	-0.201271	1.57469e-06	-0.230089	3.65437e-08	-0.265561	1.71085e-10	-0.142258	0.000735201	-0.317652	1.35447e-14	-0.202522	1.35172e-06	0.0719737	0.0888284	-0.110706	0.00874184	-0.174188	3.40462e-05	-0.316415	1.73195e-14	-0.391597	<1E-15	-0.443708	<1E-15	0.370882	<1E-15	-0.200799	1.66764e-06	-0.22665	5.88513e-08	0.164332	9.35627e-05	-0.397203	<1E-15
206	XS_VLDL_PL_pct	-0.017154	0.685432	-0.139116	0.000964084	-0.118113	0.00513222	-0.0299581	0.479248	-0.320971	7.10543e-15	-0.139214	0.000956098	-0.0745109	0.0781101	-0.333142	4.44089e-16	-0.26541	1.75336e-10	-0.187508	7.93157e-06	-0.266575	1.44968e-10	-0.249034	2.30886e-09	-0.118846	0.00486092	-0.224713	7.6721e-08	-0.305201	1.54543e-13	-0.390902	<1E-15	-0.201792	1.47783e-06	-0.187651	7.80473e-06	-0.325471	2.66454e-15	0.151171	0.000330646	-0.328961	1.33227e-15	-0.305741	1.39444e-13	-0.101692	0.0160697	-0.201338	1.56193e-06
207	XS_VLDL_C_pct	0.0699707	0.0980999	0.160093	0.000142034	0.19505	3.31683e-06	-0.0297271	0.482645	0.232438	2.62757e-08	0.297498	6.58806e-13	0.190631	5.5512e-06	0.339914	<1E-15	0.308249	8.61533e-14	0.291177	2.09566e-12	0.29457	1.12998e-12	0.342242	<1E-15	0.117376	0.00541848	0.107042	0.0112541	0.283261	8.57758e-12	0.356847	<1E-15	0.266737	1.41163e-10	0.291434	2.00062e-12	0.394715	<1E-15	-0.333031	4.44089e-16	0.300957	3.45501e-13	0.314407	2.57572e-14	-0.0025756	0.951507	0.319898	8.65974e-15
208	XS_VLDL_CE_pct	0.09429	0.0256615	0.17822	2.21497e-05	0.176041	2.79752e-05	-0.0291906	0.490585	0.248011	2.69631e-09	0.274999	3.56311e-11	0.189496	6.324e-06	0.347423	<1E-15	0.28978	2.69651e-12	0.286392	4.93827e-12	0.304594	1.73639e-13	0.336884	2.22045e-16	0.144928	0.000581397	0.1172	0.00548915	0.285966	5.32596e-12	0.357513	<1E-15	0.294645	1.11466e-12	0.30498	1.61204e-13	0.408941	<1E-15	-0.315526	2.06501e-14	0.287408	4.12248e-12	0.302972	2.36255e-13	0.0346478	0.413168	0.324889	3.10862e-15
209	XS_VLDL_FC_pct	-0.120339	0.00434782	-0.0590264	0.163041	0.291482	1.9833e-12	-0.0140198	0.740611	0.0105419	0.803425	0.350165	<1E-15	0.139428	0.000938717	0.154211	0.000249209	0.320684	7.32747e-15	0.233159	2.37319e-08	0.0699465	0.0982164	0.232742	2.51712e-08	-0.132976	0.00161171	0.00625257	0.882632	0.144833	0.000586358	0.176118	2.77486e-05	-0.0372563	0.37887	0.0848148	0.0448333	0.125508	0.00292809	-0.293911	1.27498e-12	0.289557	2.80664e-12	0.269014	9.7041e-11	-0.251198	1.65924e-09	0.15655	0.000199749
210	XS_VLDL_TG_pct	-0.0923371	0.0288976	-0.14295	0.00069207	-0.203383	1.21618e-06	0.0274388	0.51699	-0.160159	0.000141132	-0.30541	1.48548e-13	-0.210779	4.81708e-07	-0.285476	5.80846e-12	-0.269651	8.73324e-11	-0.285762	5.52225e-12	-0.253006	1.25616e-09	-0.318163	1.22125e-14	-0.110958	0.00858904	-0.0503803	0.233925	-0.220798	1.30148e-07	-0.273641	4.48217e-11	-0.256463	7.33141e-10	-0.289654	2.75824e-12	-0.358393	<1E-15	0.316786	1.59872e-14	-0.243067	5.6509e-09	-0.258925	4.97248e-10	0.0347503	0.411787	-0.305411	1.48548e-13
211	IDL_PL_pct	0.0522243	0.217228	-0.0509699	0.228491	-0.182103	1.4508e-05	-0.155054	0.000230182	-0.252715	1.31374e-09	-0.136879	0.00116546	-0.123318	0.00346807	-0.333172	4.44089e-16	-0.275865	3.0759e-11	-0.177213	2.46832e-05	-0.270141	8.05138e-11	-0.321634	6.21725e-15	-0.0277368	0.512447	-0.313466	3.10862e-14	-0.324169	3.55271e-15	-0.364759	<1E-15	-0.175562	2.94397e-05	-0.10893	0.00988912	-0.213392	3.44477e-07	0.0397529	0.347734	-0.274574	3.82889e-11	-0.288198	3.58069e-12	-0.186581	8.80833e-06	-0.144005	0.000630851
212	IDL_C_pct	-0.0302617	0.474803	0.10128	0.0165058	0.168785	5.96732e-05	0.0602494	0.154484	0.273556	4.54667e-11	0.232654	2.5487e-08	0.147157	0.000476495	0.37271	<1E-15	0.300104	4.05453e-13	0.248409	2.53882e-09	0.317098	1.5099e-14	0.341958	<1E-15	0.0316536	0.454717	0.223624	8.89543e-08	0.317961	1.28786e-14	0.387764	<1E-15	0.210903	4.74157e-07	0.185121	1.03779e-05	0.304409	1.79856e-13	-0.263089	2.55455e-10	0.296729	7.59393e-13	0.301948	2.8666e-13	0.0670813	0.112814	0.203393	1.21469e-06
213	IDL_CE_pct	-0.0804019	0.0572387	0.0337869	0.424878	0.156804	0.000194975	0.125896	0.00284061	0.234083	2.08147e-08	0.151385	0.000324198	0.115784	0.00608705	0.33717	2.22045e-16	0.238589	1.08941e-08	0.199916	1.85581e-06	0.317084	1.5099e-14	0.298502	5.46674e-13	0.00781032	0.853687	0.296293	8.23341e-13	0.298796	5.17586e-13	0.350094	<1E-15	0.175703	2.90019e-05	0.112628	0.00763465	0.217075	2.13205e-07	-0.127574	0.00248988	0.250555	1.83121e-09	0.2478	2.78381e-09	0.123434	0.00343728	0.1115	0.00826853
214	IDL_FC_pct	0.126475	0.0027149	0.188479	7.10344e-06	0.026676	0.528714	-0.204015	1.12522e-06	0.118252	0.00507963	0.274495	3.88036e-11	0.0862499	0.0413217	0.172826	3.92844e-05	0.211871	4.18939e-07	0.181011	1.6357e-05	0.0591638	0.162063	0.129086	0.00220812	0.078041	0.0649682	-0.180022	1.82209e-05	0.0919551	0.0295699	0.160121	0.000141656	0.114679	0.00659343	0.221245	1.22586e-07	0.29905	4.93605e-13	-0.463091	<1E-15	0.152098	0.000303515	0.162348	0.000113901	-0.192787	4.32447e-06	0.261858	3.11435e-10
215	IDL_TG_pct	0.00667568	0.874753	-0.118943	0.00482597	-0.140312	0.000870165	-0.0136351	0.747484	-0.246651	3.31021e-09	-0.240663	8.0519e-09	-0.137978	0.00106212	-0.332917	4.44089e-16	-0.264604	1.99897e-10	-0.247605	2.86685e-09	-0.295995	8.69749e-13	-0.303055	2.32703e-13	-0.0451626	0.286018	-0.145974	0.000529749	-0.264745	1.95383e-10	-0.340423	<1E-15	-0.206733	8.02842e-07	-0.198931	2.08961e-06	-0.306119	1.29674e-13	0.320381	7.77156e-15	-0.262789	2.68118e-10	-0.265171	1.82293e-10	-0.00982123	0.816616	-0.208859	6.14649e-07
216	L_LDL_PL_pct	0.0433224	0.306126	0.025136	0.552785	-0.220525	1.34987e-07	-0.374366	<1E-15	-0.144293	0.000614997	-0.0348698	0.41018	-0.0751345	0.075643	-0.230556	3.42334e-08	-0.211218	4.555e-07	-0.175347	3.01199e-05	-0.300547	3.73035e-13	-0.324803	3.10862e-15	0.0445047	0.293102	-0.436332	<1E-15	-0.3095	6.75016e-14	-0.337394	2.22045e-16	-0.0823	0.0515918	-0.00751608	0.859141	-0.078696	0.0627423	-0.398627	<1E-15	-0.234431	1.9808e-08	-0.243736	5.11759e-09	-0.249085	2.29097e-09	-0.041387	0.32826
217	L_LDL_C_pct	-0.0353066	0.404338	0.0743909	0.078592	0.149869	0.000372635	0.233759	2.17952e-08	0.246233	3.52487e-09	0.131038	0.00188737	0.0750306	0.0760497	0.319302	9.76996e-15	0.241961	6.65409e-09	0.243005	5.70315e-09	0.348254	<1E-15	0.321923	5.77316e-15	-0.00857802	0.839492	0.322225	5.32907e-15	0.293453	1.38622e-12	0.363639	<1E-15	0.165806	8.07274e-05	0.117452	0.00538856	0.218689	1.72323e-07	0.00517465	0.902755	0.243952	4.9561e-09	0.229347	4.05289e-08	0.115595	0.00617098	0.103546	0.0142278
218	L_LDL_CE_pct	-0.155463	0.000221474	-0.0947106	0.0250071	0.143158	0.000679615	0.379492	<1E-15	0.118982	0.00481192	-0.024423	0.564109	-0.0133706	0.752221	0.167688	6.67412e-05	0.121478	0.0039902	0.126653	0.00267727	0.275386	3.33675e-11	0.198572	2.18189e-06	-0.130172	0.00202404	0.395695	<1E-15	0.203314	1.2266e-06	0.224295	8.12038e-08	0.00674059	0.873545	-0.0712701	0.0920014	-0.0232998	0.582171	0.341032	<1E-15	0.140241	0.000875481	0.105806	0.0122362	0.180049	1.8167e-05	-0.108844	0.00994819
219	L_LDL_FC_pct	0.15494	0.000232678	0.26735	1.27661e-10	0.0531499	0.209177	-0.171167	4.66935e-05	0.23933	9.7819e-09	0.272788	5.17346e-11	0.157514	0.000182187	0.296178	8.40883e-13	0.227261	5.41067e-08	0.216512	2.29566e-07	0.19703	2.62332e-06	0.248148	2.64092e-09	0.181723	1.51283e-05	-0.0538265	0.203428	0.206386	8.38464e-07	0.293038	1.4948e-12	0.266154	1.55301e-10	0.30242	2.62235e-13	0.411334	<1E-15	-0.548501	<1E-15	0.205726	9.10254e-07	0.243901	4.99358e-09	-0.0839725	0.0470087	0.339595	<1E-15
220	L_LDL_TG_pct	0.0401702	0.342693	-0.0778025	0.0657948	-0.0761649	0.0717061	-0.0856294	0.0428105	-0.203697	1.17005e-06	-0.14208	0.00074672	-0.0627012	0.138361	-0.240769	7.92721e-09	-0.166629	7.43002e-05	-0.187163	8.24799e-06	-0.251423	1.60299e-09	-0.210748	4.8363e-07	0.00407882	0.923277	-0.15224	0.000299527	-0.181502	1.54994e-05	-0.249707	2.08406e-09	-0.134619	0.00140761	-0.114387	0.00673371	-0.200997	1.6279e-06	0.186338	9.05317e-06	-0.175121	3.08486e-05	-0.156134	0.000207806	-0.00465335	0.91251	-0.0908135	0.0316598
221	M_LDL_PL_pct	0.151567	0.0003188	0.15235	0.000296498	-0.140054	0.000889666	-0.315389	2.13163e-14	0.025424	0.548244	0.0536839	0.204631	0.02841	0.502261	-0.0728024	0.0852045	-0.0369711	0.382533	-0.0752807	0.0750738	-0.200448	1.74006e-06	-0.123309	0.00347044	0.0517521	0.221419	-0.295155	1.01497e-12	-0.0906466	0.0319758	-0.104447	0.0134017	0.0226712	0.592394	0.0803069	0.0575342	0.0559976	0.185761	-0.379997	<1E-15	-0.110064	0.00914224	-0.042179	0.31908	-0.155796	0.000214591	0.11679	0.00565653
222	M_LDL_C_pct	-0.118109	0.00513351	-0.037696	0.373265	0.123807	0.00334022	0.174082	3.44282e-05	0.111108	0.00849917	0.0970785	0.021585	0.0291948	0.490522	0.186528	8.86068e-06	0.134157	0.00146247	0.174393	3.33173e-05	0.244316	4.6948e-09	0.190183	5.84477e-06	-0.0535788	0.20552	0.185992	9.41227e-06	0.134458	0.00142648	0.190041	5.9409e-06	0.0622676	0.141114	0.0303774	0.473116	0.105232	0.0127166	-0.0558168	0.187188	0.175328	3.01811e-05	0.122305	0.00374733	-0.00021866	0.995881	0.0018597	0.964976
223	M_LDL_CE_pct	-0.231352	3.06194e-08	-0.245083	4.18734e-09	0.0694621	0.100573	0.367181	<1E-15	-0.106502	0.0116739	-0.173357	3.71558e-05	-0.0703152	0.0964525	-0.0591792	0.161953	-0.115622	0.00615909	-0.0242714	0.566531	0.126455	0.00271902	-0.00016625	0.996868	-0.142107	0.000744914	0.262554	2.78454e-10	-0.0389964	0.356993	-0.0594589	0.159976	-0.116803	0.00565118	-0.213564	3.36923e-07	-0.237544	1.26744e-08	0.467673	<1E-15	-0.0427206	0.3129	-0.12493	0.00306252	0.160642	0.000134639	-0.294086	1.23479e-12
224	M_LDL_FC_pct	0.173107	3.81466e-05	0.272159	5.74949e-11	0.0302272	0.475307	-0.279191	1.74021e-11	0.230219	3.58882e-08	0.292609	1.61648e-12	0.103767	0.0140213	0.234002	2.10557e-08	0.246348	3.46456e-09	0.182952	1.32103e-05	0.0984571	0.0197862	0.176947	2.53976e-05	0.145332	0.000560923	-0.131461	0.00182375	0.177177	2.47783e-05	0.252855	1.28582e-09	0.213147	3.55563e-07	0.301338	3.21521e-13	0.396166	<1E-15	-0.598368	<1E-15	0.232398	2.64262e-08	0.27323	4.80322e-11	-0.180969	1.64324e-05	0.356799	<1E-15
225	M_LDL_TG_pct	0.0736995	0.0814172	-0.031924	0.450871	-0.0771191	0.068211	-0.0528299	0.211935	-0.141403	0.000791896	-0.144741	0.000591135	-0.0547085	0.19611	-0.179003	2.03522e-05	-0.134291	0.00144634	-0.172402	4.10624e-05	-0.195398	3.18369e-06	-0.17486	3.17134e-05	0.0472787	0.264019	-0.0765329	0.0703412	-0.117854	0.00523104	-0.177359	2.43003e-05	-0.0820619	0.0522735	-0.0763166	0.0711407	-0.152716	0.000286569	0.25936	4.64052e-10	-0.16273	0.00010968	-0.129953	0.00205991	0.0847711	0.0449439	-0.0528024	0.212173
226	S_LDL_PL_pct	-0.152957	0.00028021	-0.208175	6.69978e-07	-0.14149	0.000785947	-0.323974	3.77476e-15	-0.202773	1.31077e-06	0.129553	0.00212713	-0.0554226	0.190326	-0.165135	8.63511e-05	-0.0080643	0.848986	-0.0448198	0.289694	-0.291556	1.9571e-12	-0.191369	5.09791e-06	-0.303193	2.26485e-13	-0.358889	<1E-15	-0.165571	8.26536e-05	-0.188358	7.20167e-06	-0.355065	<1E-15	-0.236248	1.52748e-08	-0.265909	1.61654e-10	-0.325796	2.66454e-15	-0.0886504	0.0359675	-0.0581686	0.169252	-0.365675	<1E-15	-0.155671	0.000217154
227	S_LDL_C_pct	0.134439	0.00142866	0.219439	1.56002e-07	0.129049	0.0022146	0.124547	0.00315474	0.232781	2.50337e-08	0.0824623	0.0511311	0.112792	0.00754635	0.239736	9.21976e-09	0.14762	0.00045706	0.17991	1.8445e-05	0.267647	1.21595e-10	0.261812	3.13718e-10	0.213246	3.51044e-07	0.157098	0.000189576	0.174214	3.39555e-05	0.252219	1.41825e-09	0.31618	1.82077e-14	0.278642	1.91291e-11	0.366596	<1E-15	-0.172851	3.91803e-05	0.190748	5.47669e-06	0.175319	3.02093e-05	0.068888	0.103423	0.246985	3.14815e-09
228	S_LDL_CE_pct	0.221164	1.23918e-07	0.273712	4.42915e-11	0.102224	0.0155201	0.302346	2.66009e-13	0.204159	1.1053e-06	-0.171204	4.6514e-05	0.0791467	0.0612474	0.114189	0.0068298	-0.0634783	0.133529	0.0231455	0.584672	0.262825	2.66581e-10	0.155883	0.000212829	0.377359	<1E-15	0.269897	8.38369e-11	0.102163	0.015583	0.127058	0.00259333	0.415694	<1E-15	0.286201	5.10925e-12	0.297935	6.07514e-13	0.252178	1.42724e-09	0.0065643	0.876826	-0.014945	0.724169	0.375108	<1E-15	0.190338	5.74141e-06
229	S_LDL_FC_pct	-0.0999271	0.0180132	-0.011951	0.777798	0.0944236	0.0254521	-0.220477	1.35842e-07	0.108369	0.0102789	0.336689	2.22045e-16	0.0517562	0.221383	0.194026	3.74148e-06	0.296605	7.77156e-13	0.220492	1.35582e-07	0.0706941	0.0946662	0.168281	6.28282e-05	-0.155929	0.000211898	-0.0987008	0.0194821	0.138454	0.00102009	0.201487	1.53375e-06	-0.0627006	0.138364	0.0435079	0.304058	0.139599	0.000925131	-0.542329	<1E-15	0.291361	2.02727e-12	0.291063	2.1394e-12	-0.341625	<1E-15	0.117713	0.00528589
230	S_LDL_TG_pct	-0.0406903	0.336474	-0.125381	0.00295699	-0.0530282	0.210222	0.175372	3.00392e-05	-0.153377	0.00026946	-0.278724	1.886e-11	-0.109144	0.00974458	-0.182405	1.4033e-05	-0.207157	7.61337e-07	-0.213964	3.19921e-07	-0.110486	0.00887717	-0.184088	1.1647e-05	-0.0143942	0.733944	0.139253	0.000952888	-0.101153	0.0166428	-0.177978	2.27361e-05	-0.106787	0.011451	-0.175183	3.06484e-05	-0.263678	2.32263e-10	0.598438	<1E-15	-0.188067	7.44448e-06	-0.197009	2.62993e-06	0.257543	6.18684e-10	-0.205059	9.88897e-07
231	XL_HDL_PL_pct	-0.0231245	0.585014	-0.0144613	0.732751	0.00835102	0.843684	-0.0449516	0.288277	0.142148	0.000742308	0.102244	0.0155001	0.109871	0.0092659	0.220409	1.37095e-07	0.0979846	0.0203874	0.0986093	0.0195958	0.154917	0.000233175	0.160299	0.000139216	-0.00996001	0.814072	0.115497	0.00621501	0.239441	9.62497e-09	0.223568	8.9634e-08	0.0427467	0.312605	0.00922894	0.827497	0.0355676	0.40087	-0.0632303	0.135057	0.0390492	0.356341	0.117389	0.00541331	0.129607	0.00211798	0.0691344	0.102192
232	XL_HDL_C_pct	0.0148298	0.72621	0.0343475	0.417231	-0.0797288	0.0593606	-0.0868856	0.039842	-0.085429	0.0433007	-0.00740641	0.861175	-0.0774673	0.0669712	-0.164832	8.90029e-05	-0.0548796	0.194712	-0.0479326	0.257463	-0.158271	0.000169422	-0.152867	0.000282584	-0.0144374	0.733174	-0.228373	4.6399e-08	-0.233897	2.13705e-08	-0.193941	3.77886e-06	-0.057315	0.175608	0.00523662	0.901596	0.00517198	0.902805	-0.218512	1.76413e-07	-0.0385914	0.362012	-0.097588	0.0209043	-0.249783	2.06019e-09	-0.0389335	0.357769
233	XL_HDL_CE_pct	0.102124	0.0156219	0.235047	1.81425e-08	-0.0020364	0.961651	0.0128322	0.76189	0.24615	3.56907e-09	0.126346	0.00274246	0.0553792	0.190675	0.213463	3.41372e-07	0.157838	0.000176607	0.152769	0.000285175	0.15552	0.00022027	0.209076	5.9801e-07	0.101905	0.0158474	0.00197443	0.962817	0.108094	0.0104746	0.210584	4.93826e-07	0.18622	9.17341e-06	0.191623	4.95013e-06	0.29416	1.21814e-12	-0.371214	<1E-15	0.130173	0.00202376	0.153748	0.000260262	-0.105611	0.0123978	0.199968	1.84423e-06
234	XL_HDL_FC_pct	-0.0626912	0.138423	-0.151231	0.000328826	-0.0885293	0.0362228	-0.129484	0.00213893	-0.35456	<1E-15	-0.0812542	0.0546425	-0.153089	0.000276785	-0.398376	<1E-15	-0.177329	2.4378e-05	-0.180693	1.69348e-05	-0.348179	<1E-15	-0.372185	<1E-15	-0.120729	0.00422246	-0.30984	6.32827e-14	-0.389817	<1E-15	-0.429233	<1E-15	-0.224964	7.4135e-08	-0.146274	0.000515753	-0.23499	1.8291e-08	0.0103185	0.807509	-0.147076	0.000479975	-0.247224	3.03672e-09	-0.237803	1.22077e-08	-0.204895	1.00922e-06
235	XL_HDL_TG_pct	0.0025644	0.951718	-0.053614	0.205222	0.102879	0.0148675	0.330019	1.11022e-15	-0.136948	0.00115865	-0.233329	2.31658e-08	-0.0658905	0.119361	-0.162453	0.00011272	-0.116534	0.00576355	-0.109314	0.00963062	-0.0156957	0.710919	-0.0552834	0.191444	0.0459732	0.277449	0.225002	7.37525e-08	-0.0751501	0.0755822	-0.137315	0.0011234	0.0127621	0.763153	-0.0421296	0.319647	-0.112179	0.00788173	0.627304	<1E-15	-0.04438	0.294457	-0.107762	0.010715	0.229806	3.80161e-08	-0.119275	0.00470813
236	L_HDL_PL_pct	-0.260086	4.13455e-10	-0.350696	<1E-15	0.0419796	0.321375	0.0671179	0.112617	-0.258577	5.25399e-10	-0.160227	0.0001402	-0.180587	1.71323e-05	-0.301474	3.13527e-13	-0.132674	0.0016521	-0.15462	0.000239811	-0.146693	0.000496778	-0.248914	2.35156e-09	-0.269114	9.54472e-11	0.0799937	0.0585178	-0.132537	0.00167075	-0.226536	5.97787e-08	-0.235914	1.60248e-08	-0.314204	2.68674e-14	-0.385554	<1E-15	0.27804	2.12121e-11	0.0121856	0.773553	-0.0876537	0.0381144	0.0466203	0.270735	-0.322194	5.32907e-15
237	L_HDL_C_pct	0.140942	0.000824155	0.244263	4.732e-09	-0.0753681	0.0747353	-0.172666	3.9946e-05	0.262829	2.66419e-10	0.193085	4.1768e-06	0.1379	0.00106918	0.28859	3.33822e-12	0.140188	0.00087953	0.140419	0.000862206	0.127545	0.00249547	0.194076	3.71957e-06	0.14303	0.000687275	-0.125203	0.00299826	0.129438	0.00214684	0.227448	5.27295e-08	0.147103	0.000478806	0.199597	1.9287e-06	0.28958	2.7951e-12	-0.460585	<1E-15	0.0182788	0.666013	0.108421	0.010242	-0.110938	0.00860097	0.242701	5.96561e-09
238	L_HDL_CE_pct	0.161158	0.00012802	0.270851	7.15399e-11	-0.15988	0.000145016	-0.228434	4.60056e-08	0.234148	2.0622e-08	0.132369	0.00169383	0.084087	0.046708	0.208882	6.12869e-07	0.0475658	0.261126	0.0663855	0.116604	0.0452678	0.284896	0.0859582	0.0420159	0.16297	0.000107112	-0.211613	4.33017e-07	0.037836	0.371491	0.136075	0.00124678	0.125939	0.00283124	0.180841	1.66628e-05	0.25525	8.86476e-10	-0.509405	<1E-15	-0.0639617	0.130591	0.0169588	0.688825	-0.147433	0.000464799	0.205621	9.22212e-07
239	L_HDL_FC_pct	0.00378513	0.928786	0.0354893	0.401909	0.259258	4.71677e-10	0.0928903	0.0279471	0.180708	1.69082e-05	0.324854	3.10862e-15	0.263854	2.25744e-10	0.399385	<1E-15	0.37492	<1E-15	0.315765	1.9762e-14	0.306894	1.1191e-13	0.460369	<1E-15	0.0140699	0.739717	0.213173	3.5438e-07	0.358954	<1E-15	0.375581	<1E-15	0.139585	0.000926236	0.164496	9.20471e-05	0.232096	2.75754e-08	-0.0774828	0.0669164	0.266694	1.42161e-10	0.346195	<1E-15	0.0391382	0.355245	0.241155	7.49095e-09
240	L_HDL_TG_pct	0.0204493	0.629175	-0.0764427	0.0706737	0.101869	0.0158851	0.252982	1.26078e-09	-0.208688	6.28034e-07	-0.195138	3.28259e-06	-0.0648524	0.125307	-0.213958	3.20173e-07	-0.124725	0.00311174	-0.104817	0.0130754	-0.067621	0.109941	-0.0997982	0.0181629	0.0333362	0.431086	0.15401	0.000253958	-0.0979511	0.0204306	-0.181032	1.63188e-05	-0.0157906	0.709252	-0.0317658	0.453119	-0.125168	0.00300638	0.585204	<1E-15	-0.0497443	0.23989	-0.113795	0.00702548	0.17348	3.66809e-05	-0.108174	0.010417
241	M_HDL_PL_pct	-0.194521	3.53017e-06	-0.332666	6.66134e-16	-0.0488501	0.248455	0.11393	0.00695815	-0.334928	4.44089e-16	-0.222836	9.89648e-08	-0.148531	0.000420898	-0.344486	<1E-15	-0.258092	5.67284e-10	-0.196532	2.78358e-06	-0.204962	1.0008e-06	-0.297729	6.31051e-13	-0.239098	1.01182e-08	-0.00898452	0.831996	-0.233039	2.41381e-08	-0.36903	<1E-15	-0.280476	1.39373e-11	-0.313675	2.9754e-14	-0.456625	<1E-15	0.483961	<1E-15	-0.225592	6.80373e-08	-0.292155	1.75548e-12	0.0672613	0.111849	-0.378629	<1E-15
242	M_HDL_C_pct	0.0988013	0.019358	0.228304	4.68443e-08	-0.0313347	0.459277	-0.222514	1.03358e-07	0.28243	9.92051e-12	0.231686	2.92142e-08	0.109123	0.00975876	0.280516	1.38392e-11	0.208282	6.61005e-07	0.158932	0.000158962	0.124605	0.00314077	0.196898	2.665e-06	0.113675	0.00708639	-0.107024	0.0112678	0.15589	0.000212694	0.277202	2.44857e-11	0.156732	0.000196318	0.190885	5.39089e-06	0.320848	7.10543e-15	-0.617768	<1E-15	0.156513	0.000200467	0.217315	2.06578e-07	-0.158154	0.000171334	0.261228	3.44504e-10
243	M_HDL_CE_pct	0.112527	0.00768975	0.2216	1.16885e-07	-0.138117	0.00104969	-0.325054	3.10862e-15	0.193776	3.85256e-06	0.181383	1.57032e-05	0.0446548	0.291475	0.143478	0.000660752	0.0903011	0.0326381	0.0696144	0.0998267	-0.0134552	0.750704	0.0386007	0.361896	0.100106	0.0178069	-0.269277	9.29179e-11	0.00329581	0.937972	0.107176	0.0111519	0.0871467	0.0392474	0.148353	0.000427766	0.237999	1.1867e-08	-0.673273	<1E-15	0.0352867	0.404602	0.0840546	0.0467929	-0.250844	1.75184e-09	0.193829	3.82877e-06
244	M_HDL_FC_pct	0.0261016	0.53763	0.158163	0.000171185	0.315828	1.95399e-14	0.209147	5.92628e-07	0.418498	<1E-15	0.260053	4.15639e-10	0.240434	8.32531e-09	0.562054	<1E-15	0.463526	<1E-15	0.346828	<1E-15	0.501713	<1E-15	0.602514	<1E-15	0.121722	0.00391696	0.464852	<1E-15	0.544053	<1E-15	0.656675	<1E-15	0.307001	1.0969e-13	0.238111	1.16768e-08	0.412938	<1E-15	-0.0981915	0.0201221	0.438487	<1E-15	0.516745	<1E-15	0.226457	6.04354e-08	0.352337	<1E-15
245	M_HDL_TG_pct	-0.0181763	0.667775	-0.128372	0.00233732	0.0975512	0.0209528	0.288933	3.13904e-12	-0.209914	5.37771e-07	-0.214917	2.82709e-07	-0.0609281	0.149885	-0.199606	1.92649e-06	-0.14584	0.000536128	-0.108213	0.0103893	-0.0462972	0.274073	-0.0914635	0.0304549	-0.00409563	0.922961	0.192262	4.59691e-06	-0.0777426	0.0660036	-0.176389	2.69576e-05	-0.0431139	0.308461	-0.0786908	0.0627597	-0.184189	1.15164e-05	0.665381	<1E-15	-0.0850547	0.0442293	-0.140213	0.000877609	0.216828	2.20232e-07	-0.149371	0.000389972
246	S_HDL_PL_pct	-0.281187	1.23193e-11	-0.295442	9.62785e-13	0.00364458	0.931423	0.0352354	0.405287	-0.04068	0.336597	-0.15435	0.000245974	-0.0897801	0.0336595	-0.0021445	0.959616	-0.077548	0.0666864	-0.129415	0.00215074	0.0685391	0.105187	-0.0936988	0.0266064	-0.182219	1.4324e-05	0.276473	2.77305e-11	0.119567	0.00460676	0.0747639	0.0771014	-0.135059	0.00135713	-0.294755	1.09246e-12	-0.300285	3.91909e-13	0.271608	6.30498e-11	-0.00524271	0.901483	-0.0154452	0.715331	0.320294	7.99361e-15	-0.250627	1.81092e-09
247	S_HDL_C_pct	0.203036	1.26922e-06	0.288154	3.60867e-12	-0.0510071	0.228151	-0.190102	5.89973e-06	0.180288	1.77003e-05	0.222666	1.01254e-07	0.0986978	0.0194858	0.136052	0.00124924	0.141916	0.000757396	0.155611	0.000218389	0.0187308	0.658272	0.126653	0.00267713	0.159319	0.00015312	-0.251122	1.67867e-09	0.00384076	0.927742	0.0875341	0.038379	0.161899	0.000119043	0.272527	5.4055e-11	0.341681	<1E-15	-0.566927	<1E-15	0.0749212	0.0764794	0.109677	0.0093911	-0.283931	7.62679e-12	0.272625	5.31699e-11
248	S_HDL_CE_pct	0.135247	0.00133604	0.218252	1.82581e-07	-0.159565	0.000149507	-0.26432	2.0932e-10	0.111274	0.00840086	0.121008	0.00413433	0.00974245	0.818062	0.0175269	0.678972	0.00770673	0.855607	0.0373007	0.378301	-0.0811936	0.054824	-0.0498039	0.239326	0.102649	0.0150945	-0.33298	4.44089e-16	-0.113567	0.00714126	-0.0506495	0.231433	0.0677506	0.10926	0.15714	0.000188815	0.19638	2.83405e-06	-0.572101	<1E-15	-0.0276214	0.514205	-0.02263	0.593067	-0.292093	1.77502e-12	0.136388	0.00121453
249	S_HDL_FC_pct	0.206006	8.79119e-07	0.240275	8.52165e-09	0.332216	6.66134e-16	0.196119	2.92327e-06	0.225144	7.23365e-08	0.322059	5.55112e-15	0.285357	5.9317e-12	0.402097	<1E-15	0.425984	<1E-15	0.369166	<1E-15	0.315051	2.26485e-14	0.565354	<1E-15	0.165938	7.96625e-05	0.213524	3.38659e-07	0.335478	4.44089e-16	0.402388	<1E-15	0.274607	3.80753e-11	0.341178	<1E-15	0.431208	<1E-15	-0.0381329	0.367748	0.326886	2.22045e-15	0.410863	<1E-15	-0.0180546	0.669868	0.42343	<1E-15
250	S_HDL_TG_pct	-0.0197366	0.641177	-0.144643	0.000596288	0.0774803	0.066925	0.275644	3.19338e-11	-0.244508	4.56237e-09	-0.185311	1.01602e-05	-0.0526706	0.213318	-0.219291	1.59099e-07	-0.143061	0.000685373	-0.100138	0.0177708	-0.0982711	0.020021	-0.0957651	0.0234291	-0.0438094	0.300716	0.123969	0.00329868	-0.129325	0.00216634	-0.225744	6.6642e-08	-0.101584	0.0161832	-0.106179	0.0119324	-0.22031	1.38919e-07	0.63555	<1E-15	-0.127249	0.00255453	-0.168073	6.41723e-05	0.129128	0.00220057	-0.17142	4.5486e-05
[truncated: 30 more columns]

## Sheet: S6
S6: Spearman correlation (rho) of NMR biomarkers and lipid class totals at 12 months
	LC/MS lipid class	Sph		S1P		dhCer		Cer		C1P		MHC		DHC		THC		GM3		GM1		Sulfatide		SM		PA		PC		PC(O)		PC(P)		LPC		LPC(O)		LPC(P)		PE		PE(O)		PE(P)		LPE		LPE(P)
#	NMR biomarker	rho	p	rho	p	rho	p	rho	p	rho	p	rho	p	rho	p	rho	p	rho	p	rho	p	rho	p	rho	p	rho	p	rho	p	rho	p	rho	p	rho	p	rho	p	rho	p	rho	p	rho	p	rho	p	rho	p	rho	p
1	XXL_VLDL_P	-0.181143	7.80517e-07	-0.272429	5.88418e-14	0.15607	2.16492e-05	0.387801	<1E-15	-0.10163	0.00585407	-0.252531	3.84226e-12	-0.0175036	0.635897	-0.0327554	0.375537	0.0229353	0.534998	0.0153169	0.678662	0.134105	0.000268949	0.125701	0.000641841	-0.123815	0.000774674	0.487843	<1E-15	0.102464	0.00545945	0.0578618	0.117289	0.0550147	0.136469	-0.0985627	0.00753419	-0.121734	0.000950644	0.630915	<1E-15	0.0477361	0.196419	-0.0393838	0.286605	0.374599	<1E-15	-0.145932	7.24227e-05
2	XXL_VLDL_L	-0.17747	1.30919e-06	-0.269265	1.17018e-13	0.157273	1.86639e-05	0.38991	<1E-15	-0.101602	0.00586781	-0.253205	3.35465e-12	-0.0159709	0.665756	-0.0334687	0.365223	0.0241451	0.513673	0.0156357	0.672358	0.134854	0.000248272	0.127338	0.000543987	-0.120258	0.001097	0.489292	<1E-15	0.102326	0.00552301	0.0568294	0.123984	0.0572599	0.121156	-0.0959597	0.00928561	-0.11983	0.0011432	0.634876	<1E-15	0.0469286	0.204105	-0.0405253	0.272857	0.376199	<1E-15	-0.143705	9.34579e-05
3	XXL_VLDL_PL	-0.164844	7.15077e-06	-0.255084	2.29194e-12	0.163366	8.65257e-06	0.397689	<1E-15	-0.0915113	0.0131293	-0.261712	5.83533e-13	-0.017073	0.644228	-0.023168	0.53086	0.0266768	0.470518	0.0213036	0.564448	0.140731	0.000130606	0.141719	0.000116947	-0.100494	0.00643234	0.503029	<1E-15	0.111042	0.00259023	0.0679015	0.0659735	0.0744622	0.0437244	-0.0821152	0.0261037	-0.104671	0.00452901	0.649015	<1E-15	0.0573114	0.120822	-0.0290922	0.431281	0.389308	<1E-15	-0.12986	0.000420001
4	XXL_VLDL_C	-0.1233	0.000815186	-0.223969	8.48136e-10	0.173563	2.2434e-06	0.411305	<1E-15	-0.10198	0.00568564	-0.245191	1.64415e-11	0.0162341	0.660588	-0.0412644	0.264199	0.0480216	0.193753	0.024729	0.50354	0.142542	0.00010661	0.150086	4.45689e-05	-0.0867894	0.0186845	0.490523	<1E-15	0.106414	0.00389801	0.0468579	0.204789	0.0836345	0.0234532	-0.0523629	0.156427	-0.0886281	0.0163153	0.657376	<1E-15	0.0306266	0.407371	-0.0557905	0.131018	0.37832	<1E-15	-0.107827	0.00344626
5	XXL_VLDL_CE	-0.115626	0.00170229	-0.217504	2.61518e-09	0.185731	4.03133e-07	0.413401	<1E-15	-0.0967534	0.00871661	-0.218733	2.11691e-09	0.0418479	0.257498	-0.0342562	0.354044	0.0710595	0.0543137	0.0398537	0.28089	0.151023	3.98765e-05	0.171442	2.99007e-06	-0.0955168	0.00961731	0.481418	<1E-15	0.116034	0.00163873	0.0512008	0.165839	0.0806429	0.0289146	-0.0417865	0.258197	-0.0816499	0.0269654	0.627622	<1E-15	0.0341987	0.354853	-0.0560192	0.129443	0.350302	<1E-15	-0.0992622	0.00711697
6	XXL_VLDL_FC	-0.136702	0.000203413	-0.234352	1.29244e-10	0.153749	2.87397e-05	0.3968	<1E-15	-0.107984	0.00339911	-0.272997	5.19584e-14	-0.0235612	0.52391	-0.0524454	0.155774	0.0143684	0.69755	0.0028371	0.938836	0.12498	0.000689881	0.118668	0.00127777	-0.0818307	0.0266277	0.489409	<1E-15	0.0876608	0.0175266	0.0385222	0.297287	0.080039	0.0301408	-0.0705547	0.0560531	-0.101958	0.00569603	0.675131	<1E-15	0.0293589	0.427068	-0.0536318	0.146617	0.398833	<1E-15	-0.120606	0.00106076
7	XXL_VLDL_TG	-0.189923	2.17226e-07	-0.27906	1.35447e-14	0.151291	3.86216e-05	0.381264	<1E-15	-0.102878	0.00527291	-0.251905	4.35785e-12	-0.024138	0.513797	-0.0331719	0.369493	0.0190627	0.606119	0.0130624	0.723861	0.132508	0.000318543	0.118342	0.00131817	-0.133074	0.000300061	0.483053	<1E-15	0.0991615	0.00717571	0.0581174	0.115675	0.0499056	0.176823	-0.105802	0.00410971	-0.12677	0.000576239	0.620575	<1E-15	0.0484058	0.190208	-0.0377825	0.306667	0.371712	<1E-15	-0.151644	3.70283e-05
8	XL_VLDL_P	-0.138815	0.000161485	-0.222606	1.0786e-09	0.159865	1.35039e-05	0.414831	<1E-15	-0.122105	0.000916749	-0.27195	6.52811e-14	-0.0281827	0.445828	-0.056978	0.123002	0.0170389	0.64489	-0.000303156	0.993458	0.123875	0.000770133	0.106519	0.0038627	-0.0821973	0.0259541	0.489606	<1E-15	0.0741818	0.0445256	0.0256752	0.487348	0.0886326	0.0163097	-0.0660372	0.073774	-0.0974597	0.00823663	0.666982	<1E-15	0.012946	0.726223	-0.0710947	0.054194	0.405924	<1E-15	-0.120388	0.00108329
9	XL_VLDL_L	-0.138565	0.000165984	-0.222809	1.04082e-09	0.160555	1.23789e-05	0.415578	<1E-15	-0.120543	0.00106728	-0.271065	7.90479e-14	-0.0260273	0.481394	-0.0556759	0.131812	0.0190789	0.605813	0.00165778	0.964237	0.125718	0.000640726	0.109577	0.00295291	-0.0820967	0.0261374	0.491085	<1E-15	0.07674	0.0376545	0.0276117	0.455102	0.0884997	0.0164717	-0.0653481	0.0768417	-0.096817	0.00867235	0.667497	<1E-15	0.0141512	0.701901	-0.0700282	0.0579164	0.404695	<1E-15	-0.119983	0.00112645
10	XL_VLDL_PL	-0.134811	0.000249421	-0.219847	1.74593e-09	0.179144	1.03563e-06	0.431027	<1E-15	-0.106134	0.00399361	-0.263693	3.84803e-13	-0.0061269	0.868384	-0.0327341	0.375848	0.0401441	0.277397	0.0223541	0.545397	0.14564	7.49062e-05	0.143087	0.000100244	-0.0784984	0.0334725	0.510494	<1E-15	0.0998177	0.00680051	0.0506954	0.170063	0.0958218	0.00938777	-0.058715	0.111972	-0.0869993	0.0183996	0.670194	<1E-15	0.0344704	0.35104	-0.0515777	0.162741	0.406826	<1E-15	-0.111929	0.00239092
11	XL_VLDL_C	-0.130545	0.000391214	-0.218695	2.13097e-09	0.159729	1.37377e-05	0.410223	<1E-15	-0.115391	0.00173992	-0.258457	1.14819e-12	-0.00791578	0.830472	-0.0537218	0.14594	0.0298959	0.418658	0.0123455	0.738445	0.134248	0.000264865	0.124322	0.000736701	-0.0856718	0.0202669	0.486605	<1E-15	0.0897458	0.0150076	0.0333345	0.36715	0.0863338	0.0193159	-0.054242	0.14207	-0.0883422	0.0166653	0.661624	<1E-15	0.0124959	0.735379	-0.0712146	0.0537883	0.386967	<1E-15	-0.112864	0.00219624
12	XL_VLDL_CE	-0.13126	0.000363121	-0.219706	1.78922e-09	0.14836	5.46157e-05	0.396813	<1E-15	-0.131041	0.000371519	-0.251557	4.67248e-12	-0.0112301	0.761324	-0.0741003	0.0447609	0.0211844	0.566629	0.00197635	0.957371	0.119714	0.00115601	0.100706	0.00632087	-0.0928702	0.011828	0.463586	<1E-15	0.0720908	0.0508995	0.0102893	0.780786	0.0772328	0.0364399	-0.0553725	0.133934	-0.0951436	0.00990489	0.650355	<1E-15	-0.0082118	0.824234	-0.0908267	0.0138315	0.371815	<1E-15	-0.117937	0.00136983
13	XL_VLDL_FC	-0.127305	0.000545809	-0.213422	5.23013e-09	0.177146	1.36948e-06	0.426679	<1E-15	-0.0959634	0.0092829	-0.26224	5.22249e-13	-0.0012176	0.973729	-0.025857	0.48427	0.0436037	0.238049	0.0272775	0.460581	0.151578	3.73198e-05	0.154563	2.60345e-05	-0.074854	0.042625	0.514234	<1E-15	0.110549	0.00270746	0.0622234	0.092077	0.099473	0.00699535	-0.0509715	0.167745	-0.0783074	0.0339066	0.669459	<1E-15	0.0407247	0.270502	-0.0442433	0.231228	0.405592	<1E-15	-0.103655	0.00493779
14	XL_VLDL_TG	-0.140209	0.000138416	-0.223088	9.90955e-10	0.156729	1.99621e-05	0.411341	<1E-15	-0.125633	0.000646235	-0.274698	3.57492e-14	-0.0360373	0.329565	-0.0606373	0.100689	0.0108923	0.768295	-0.00652385	0.859942	0.118526	0.00129527	0.0971362	0.00845343	-0.0815282	0.0271948	0.485197	<1E-15	0.0669998	0.0696574	0.0209977	0.570053	0.0882401	0.016792	-0.0689323	0.0619599	-0.0999145	0.0067467	0.664853	<1E-15	0.0100589	0.785574	-0.0735945	0.0462441	0.408769	<1E-15	-0.121989	0.000927213
15	L_VLDL_P	-0.111803	0.00241833	-0.193416	1.28382e-07	0.142484	0.00010731	0.423556	<1E-15	-0.156245	2.1189e-05	-0.287032	2.22045e-15	-0.0426339	0.248659	-0.0876502	0.0175402	0.00661828	0.857936	-0.0396572	0.28327	0.115669	0.00169543	0.0681315	0.0650599	-0.0467499	0.205835	0.456096	<1E-15	0.0315032	0.394072	-0.0277416	0.452983	0.0991084	0.0072069	-0.0498409	0.177386	-0.0953113	0.00977473	0.686114	<1E-15	-0.0238945	0.518053	-0.107518	0.00354086	0.416843	<1E-15	-0.112452	0.00228024
16	L_VLDL_L	-0.108577	0.00322637	-0.19123	1.78627e-07	0.144959	8.09942e-05	0.426073	<1E-15	-0.154391	2.65838e-05	-0.286711	2.22045e-15	-0.0401449	0.277388	-0.0861329	0.0196004	0.00852815	0.81758	-0.0374275	0.311237	0.117704	0.00140037	0.0718553	0.0516627	-0.0448551	0.224834	0.458252	<1E-15	0.0346803	0.348114	-0.0256111	0.488437	0.102448	0.00546704	-0.045837	0.214838	-0.0917525	0.0128894	0.688232	<1E-15	-0.0225828	0.541293	-0.106509	0.00386597	0.418379	<1E-15	-0.109443	0.00298833
17	L_VLDL_PL	-0.0972368	0.0083855	-0.182052	6.85715e-07	0.16108	1.15836e-05	0.441772	<1E-15	-0.148006	5.69291e-05	-0.278242	1.62093e-14	-0.0220695	0.550527	-0.0726422	0.0491486	0.0262269	0.478038	-0.0233991	0.526769	0.128366	0.000489824	0.0959845	0.0092673	-0.0372679	0.313306	0.466384	<1E-15	0.0465954	0.207339	-0.0176765	0.632563	0.109401	0.00299938	-0.0363967	0.324761	-0.0833914	0.0238609	0.693973	<1E-15	-0.0157236	0.670624	-0.0988895	0.00733665	0.418765	<1E-15	-0.100048	0.00667287
18	L_VLDL_C	-0.0825235	0.0253672	-0.171853	2.8289e-06	0.154086	2.75884e-05	0.435568	<1E-15	-0.144659	8.38213e-05	-0.277799	1.77636e-14	-0.0189578	0.608102	-0.0812469	0.0277315	0.0207047	0.575449	-0.0227843	0.53769	0.130922	0.000376169	0.0910116	0.0136386	-0.0290368	0.432159	0.461493	<1E-15	0.0530987	0.15068	-0.015794	0.669237	0.125676	0.000643433	-0.0118246	0.749102	-0.0633763	0.0861955	0.693356	<1E-15	-0.0202683	0.583528	-0.104331	0.00466241	0.419381	<1E-15	-0.0859492	0.0198635
19	L_VLDL_CE	-0.0680878	0.0652325	-0.159441	1.4243e-05	0.146547	6.74532e-05	0.424121	<1E-15	-0.151008	3.99503e-05	-0.262344	5.11147e-13	-0.0120532	0.744421	-0.0942387	0.0106343	0.0207727	0.574195	-0.0232812	0.528855	0.128118	0.000502429	0.0773791	0.0360858	-0.0254558	0.491077	0.433534	<1E-15	0.0461913	0.211311	-0.032009	0.386519	0.131778	0.000343947	0.00869133	0.814153	-0.0512811	0.165175	0.671677	<1E-15	-0.0373898	0.311725	-0.117112	0.00148095	0.401598	<1E-15	-0.0749071	0.0424779
20	L_VLDL_FC	-0.0958395	0.0093746	-0.181637	7.27579e-07	0.160002	1.32737e-05	0.441687	<1E-15	-0.135802	0.000224217	-0.289528	1.33227e-15	-0.0249883	0.499074	-0.0668954	0.0700945	0.0214964	0.560928	-0.0220459	0.550953	0.133055	0.000300679	0.105174	0.00433797	-0.0307273	0.405829	0.484941	<1E-15	0.0599782	0.104451	0.000975748	0.978946	0.119182	0.00121656	-0.0318373	0.389074	-0.07478	0.0428309	0.706736	<1E-15	-0.00255795	0.944844	-0.0884067	0.0165858	0.433461	<1E-15	-0.0946644	0.0102854
21	L_VLDL_TG	-0.121774	0.000946959	-0.200815	4.08169e-08	0.134189	0.000266541	0.414201	<1E-15	-0.15874	1.55499e-05	-0.291354	8.88178e-16	-0.0527765	0.153176	-0.0906265	0.0140429	-0.00098239	0.978803	-0.0473266	0.20029	0.108859	0.00314694	0.0569651	0.123087	-0.0527411	0.153452	0.451688	<1E-15	0.0221655	0.548795	-0.0317318	0.390649	0.0896809	0.0150808	-0.0628803	0.0886877	-0.105753	0.00412718	0.680764	<1E-15	-0.0251198	0.496818	-0.109749	0.00290809	0.414211	<1E-15	-0.12186	0.000938999
22	M_VLDL_P	-0.090958	0.0136942	-0.171896	2.81269e-06	0.152287	3.428e-05	0.44201	<1E-15	-0.167459	5.08141e-06	-0.268184	1.47882e-13	-0.0214253	0.562224	-0.0853499	0.0207438	0.0274832	0.457204	-0.0241576	0.513454	0.119284	0.00120475	0.0866992	0.0188081	-0.0398077	0.281446	0.435241	<1E-15	0.0293663	0.426951	-0.0402995	0.27554	0.107248	0.00362516	-0.0239969	0.51626	-0.0798414	0.0305515	0.671051	<1E-15	-0.0426551	0.248424	-0.116562	0.00155958	0.38914	<1E-15	-0.0999984	0.00670033
23	M_VLDL_L	-0.0846996	0.021737	-0.166634	5.66272e-06	0.15864	1.57446e-05	0.44805	<1E-15	-0.162707	9.41537e-06	-0.265394	2.6823e-13	-0.014712	0.690685	-0.0791456	0.0320363	0.034754	0.34709	-0.0182938	0.620726	0.12537	0.000663532	0.0974025	0.00827461	-0.0349757	0.344021	0.440243	<1E-15	0.0374413	0.311059	-0.0343542	0.352668	0.114314	0.00192261	-0.015676	0.671564	-0.0722512	0.0503847	0.673478	<1E-15	-0.0382885	0.30023	-0.112222	0.00232835	0.391931	<1E-15	-0.0926437	0.0120366
24	M_VLDL_PL	-0.0692159	0.0608918	-0.150574	4.20624e-05	0.177397	1.32249e-06	0.464318	<1E-15	-0.15526	2.39111e-05	-0.255134	2.26885e-12	0.00335673	0.927662	-0.0619551	0.0934904	0.0526293	0.154327	-0.0027615	0.940463	0.139451	0.000150554	0.124328	0.000736243	-0.0199488	0.589477	0.447616	<1E-15	0.0531617	0.150195	-0.0225778	0.541383	0.127615	0.000528861	0.00198784	0.957123	-0.0560786	0.129037	0.676596	<1E-15	-0.0284909	0.440867	-0.101297	0.00601826	0.391798	<1E-15	-0.0755127	0.0408296
25	M_VLDL_C	-0.0241944	0.512814	-0.108635	0.00320986	0.214298	4.51229e-09	0.490551	<1E-15	-0.113162	0.00213714	-0.229695	3.03891e-10	0.0539211	0.144448	-0.0167626	0.650263	0.104144	0.00473699	0.0427255	0.247643	0.181968	6.93956e-07	0.195195	9.7857e-08	0.00591787	0.872836	0.46691	<1E-15	0.108112	0.00336095	0.0259473	0.482743	0.177196	1.36006e-06	0.0628949	0.0886135	0.00378238	0.918519	0.658227	<1E-15	0.00632027	0.86427	-0.0690038	0.0616892	0.397187	<1E-15	-0.0204763	0.579671
26	M_VLDL_CE	0.0024891	0.946326	-0.0748436	0.042654	0.239888	4.56568e-11	0.492726	<1E-15	-0.0736044	0.0462147	-0.181059	7.89893e-07	0.10697	0.00371435	0.0299531	0.417766	0.155073	2.44642e-05	0.0941555	0.0107037	0.21685	2.92516e-09	0.255444	2.13007e-12	0.0123302	0.738758	0.45372	<1E-15	0.155338	2.36837e-05	0.0679729	0.0656887	0.199158	5.29617e-08	0.107598	0.0035161	0.0489427	0.185333	0.587521	<1E-15	0.0383988	0.298839	-0.0361042	0.328667	0.358017	<1E-15	0.0206253	0.576915
27	M_VLDL_FC	-0.0531738	0.150102	-0.139058	0.000157216	0.170506	3.3907e-06	0.458366	<1E-15	-0.151167	3.91977e-05	-0.268398	1.4122e-13	-0.00487423	0.895118	-0.0699156	0.0583218	0.0415502	0.260901	-0.0139507	0.705927	0.130483	0.000393735	0.116447	0.00157659	0.00114959	0.975196	0.453098	<1E-15	0.0502401	0.173936	-0.0223828	0.544882	0.14394	9.09955e-05	0.0129946	0.725236	-0.0439568	0.234266	0.697144	<1E-15	-0.0294129	0.426217	-0.100861	0.00623986	0.415775	<1E-15	-0.0626644	0.0897901
28	M_VLDL_TG	-0.117364	0.00144624	-0.195655	9.11812e-08	0.121555	0.000967389	0.411728	<1E-15	-0.185602	4.10736e-07	-0.278955	1.37668e-14	-0.0509178	0.168194	-0.11233	0.00230558	-0.00447716	0.903619	-0.0517955	0.160971	0.0911934	0.0134513	0.0416664	0.259569	-0.0597113	0.106006	0.413759	<1E-15	-0.00157875	0.965941	-0.0643377	0.0815259	0.0761061	0.0392672	-0.0590614	0.109868	-0.112384	0.00229434	0.661578	<1E-15	-0.0604415	0.101795	-0.131603	0.000350333	0.377668	<1E-15	-0.129456	0.000437917
29	S_VLDL_P	0.0414092	0.262524	-0.0374951	0.310363	0.211564	7.13722e-09	0.479749	<1E-15	-0.11599	0.00164544	-0.182978	6.00506e-07	0.0763789	0.0385661	-0.0118908	0.747746	0.111462	0.0024942	0.0487392	0.18717	0.171002	3.17241e-06	0.200565	4.24573e-08	0.0689503	0.0618917	0.387605	<1E-15	0.100999	0.00616929	0.00270804	0.941613	0.20552	1.92485e-08	0.126457	0.000594797	0.0594209	0.107718	0.617547	<1E-15	-0.0249461	0.4998	-0.0576702	0.118509	0.357662	<1E-15	0.0320069	0.386552
30	S_VLDL_L	0.0518033	0.160907	-0.0252625	0.494375	0.22351	9.19796e-10	0.486281	<1E-15	-0.103159	0.00514948	-0.170791	3.26377e-06	0.0912842	0.0133586	0.00485672	0.895493	0.127893	0.00051408	0.0648688	0.079036	0.182633	6.30954e-07	0.222719	1.05739e-09	0.0768684	0.0373349	0.391377	<1E-15	0.116196	0.00161411	0.0177605	0.630949	0.215222	3.85946e-09	0.140494	0.0001341	0.0741373	0.0446539	0.607228	<1E-15	-0.0129705	0.725725	-0.0443638	0.229959	0.352155	<1E-15	0.0467556	0.20578
31	S_VLDL_PL	0.0826738	0.0251004	0.0101297	0.784101	0.237041	7.82168e-11	0.485341	<1E-15	-0.0848209	0.0215486	-0.170496	3.39524e-06	0.0856642	0.020278	0.00869562	0.814063	0.116754	0.00153175	0.056275	0.1277	0.187821	2.96696e-07	0.22413	8.24331e-10	0.118775	0.0012648	0.394508	<1E-15	0.12125	0.000996498	0.0269772	0.465533	0.254761	2.44782e-12	0.173315	2.32023e-06	0.108994	0.00310961	0.604675	<1E-15	0.00151324	0.967354	-0.0244703	0.508016	0.374232	<1E-15	0.079571	0.0311214
32	S_VLDL_C	0.0866821	0.0188316	0.0316663	0.391627	0.280409	9.99201e-15	0.480937	<1E-15	0.00446914	0.903791	-0.0583686	0.114107	0.201095	3.9049e-08	0.135007	0.000244219	0.243521	2.27405e-11	0.188498	2.68465e-07	0.262344	5.11147e-13	0.374912	<1E-15	0.0806704	0.0288599	0.376393	<1E-15	0.223296	9.55219e-10	0.135264	0.000237591	0.234147	1.3425e-10	0.203817	2.53175e-08	0.150654	4.16675e-05	0.441049	<1E-15	0.0866212	0.0189155	0.0529356	0.151939	0.246575	1.25453e-11	0.12537	0.000663535
33	S_VLDL_CE	0.0643011	0.0817	0.0272448	0.461118	0.278653	1.46549e-14	0.436105	<1E-15	0.0398851	0.280511	0.00416865	0.910231	0.233506	1.51159e-10	0.175083	1.82174e-06	0.276335	2.4869e-14	0.237144	7.67235e-11	0.269872	1.02585e-13	0.413321	<1E-15	0.0364298	0.324321	0.333999	<1E-15	0.246856	1.18714e-11	0.170425	3.42788e-06	0.192032	1.58309e-07	0.186113	3.8126e-07	0.141904	0.000114545	0.312011	<1E-15	0.120937	0.00102723	0.0821544	0.0260321	0.151152	3.92694e-05	0.122051	0.000921657
34	S_VLDL_FC	0.103242	0.00511352	0.0304029	0.410807	0.246347	1.31193e-11	0.48811	<1E-15	-0.0669181	0.0699992	-0.15587	2.21882e-05	0.111371	0.00251464	0.0381156	0.302419	0.148218	5.55337e-05	0.0805112	0.0291783	0.199744	4.83119e-08	0.260701	7.20757e-13	0.133937	0.000273802	0.39594	<1E-15	0.144727	8.31749e-05	0.0508968	0.16837	0.266527	2.10942e-13	0.1956	9.19557e-08	0.133706	0.000280624	0.599365	<1E-15	0.0106477	0.773355	-0.0105851	0.774653	0.368595	<1E-15	0.104729	0.00450661
35	S_VLDL_TG	-0.00212719	0.954121	-0.0841123	0.0226693	0.145776	7.37357e-05	0.425265	<1E-15	-0.170752	3.28055e-06	-0.231739	2.0927e-10	0.00409672	0.911774	-0.0922971	0.0123622	0.0303766	0.411212	-0.0248145	0.502066	0.100844	0.00624884	0.0883506	0.016655	0.0395975	0.283997	0.351998	<1E-15	0.0231026	0.532022	-0.0678144	0.0663222	0.154492	2.62581e-05	0.0589008	0.11084	-0.00750139	0.839223	0.644737	<1E-15	-0.0857724	0.0201198	-0.114786	0.00184056	0.372096	<1E-15	-0.0312751	0.397507
36	XS_VLDL_P	0.14075	0.00013033	0.0829541	0.0246099	0.344098	<1E-15	0.466968	<1E-15	0.0728519	0.0484963	-0.00505966	0.891153	0.255516	2.09921e-12	0.21537	3.76369e-09	0.298796	<1E-15	0.23909	5.31315e-11	0.259545	9.166e-13	0.483001	<1E-15	0.117616	0.00141216	0.358044	<1E-15	0.252624	3.77165e-12	0.186718	3.48959e-07	0.251039	5.18341e-12	0.214324	4.49283e-09	0.178974	1.06073e-06	0.384001	<1E-15	0.135506	0.000231482	0.127829	0.00051748	0.225758	6.17311e-10	0.178396	1.15032e-06
37	XS_VLDL_L	0.13118	0.000366166	0.0829467	0.0246226	0.344623	<1E-15	0.45569	<1E-15	0.0915601	0.0130804	0.00745663	0.840169	0.259894	8.52651e-13	0.235285	1.08653e-10	0.307821	<1E-15	0.252771	3.66152e-12	0.266714	2.02505e-13	0.500965	<1E-15	0.104476	0.00460501	0.354811	<1E-15	0.265771	2.47802e-13	0.209434	1.01591e-08	0.241642	3.26534e-11	0.20837	1.21023e-08	0.180736	8.27005e-07	0.345074	<1E-15	0.155369	2.35933e-05	0.143357	9.72195e-05	0.200458	4.31798e-08	0.177651	1.27663e-06
38	XS_VLDL_PL	0.0840278	0.0228062	0.0737342	0.0458303	0.342485	<1E-15	0.402369	<1E-15	0.129901	0.000418261	0.0736044	0.0462147	0.287557	1.77636e-15	0.286679	2.22045e-15	0.340847	<1E-15	0.294989	4.44089e-16	0.263868	3.70814e-13	0.537595	<1E-15	0.0607753	0.099915	0.294295	4.44089e-16	0.279133	1.33227e-14	0.241449	3.38845e-11	0.177583	1.28879e-06	0.161284	1.12882e-05	0.151152	3.92672e-05	0.177623	1.28157e-06	0.195687	9.07394e-08	0.17374	2.18968e-06	0.0852581	0.0208816	0.153493	2.96433e-05
39	XS_VLDL_C	0.106636	0.00382358	0.0759001	0.0398037	0.330757	<1E-15	0.398327	<1E-15	0.150331	4.32977e-05	0.0362185	0.327137	0.248208	9.09695e-12	0.27702	2.13163e-14	0.307726	<1E-15	0.273368	4.79616e-14	0.278138	1.66533e-14	0.519817	<1E-15	0.063221	0.0869696	0.342302	<1E-15	0.294493	4.44089e-16	0.266083	2.31815e-13	0.220574	1.53874e-09	0.192467	1.48256e-07	0.187281	3.21235e-07	0.234208	1.32723e-10	0.206583	1.62015e-08	0.179871	9.3472e-07	0.144785	8.2623e-05	0.173441	2.28093e-06
40	XS_VLDL_CE	0.105527	0.00420847	0.0653021	0.0770499	0.334071	<1E-15	0.394246	<1E-15	0.155777	2.24434e-05	0.0355996	0.335476	0.243926	2.10234e-11	0.271339	7.4607e-14	0.300665	<1E-15	0.271451	7.28306e-14	0.277849	1.77636e-14	0.507811	<1E-15	0.0587694	0.111639	0.347398	<1E-15	0.292628	4.44089e-16	0.263453	4.04787e-13	0.223852	8.6594e-10	0.188799	2.56731e-07	0.184231	5.01211e-07	0.24585	1.44578e-11	0.206759	1.57441e-08	0.176711	1.45486e-06	0.168509	4.42372e-06	0.169772	3.7405e-06
41	XS_VLDL_FC	0.101025	0.00615604	0.0920411	0.0126076	0.305384	<1E-15	0.381148	<1E-15	0.137741	0.000181671	0.0334081	0.366093	0.243752	2.1747e-11	0.269624	1.08358e-13	0.303075	<1E-15	0.259759	8.76854e-13	0.255674	2.0326e-12	0.514849	<1E-15	0.0701925	0.0573295	0.305985	<1E-15	0.279632	1.19904e-14	0.254383	2.643e-12	0.198056	6.29023e-08	0.187404	3.15465e-07	0.181044	7.91577e-07	0.195024	1.00457e-07	0.191066	1.83076e-07	0.171802	2.84847e-06	0.0868616	0.018586	0.169299	3.98372e-06
42	XS_VLDL_TG	0.169712	3.77048e-06	0.0582505	0.114842	0.22258	1.08359e-09	0.43168	<1E-15	-0.102525	0.0054319	-0.134549	0.000256496	0.13004	0.000412279	-0.0184682	0.6174	0.1303	0.000401315	0.0635292	0.085439	0.113778	0.00201991	0.202348	3.20136e-08	0.198284	6.07085e-08	0.302853	<1E-15	0.0715877	0.0525419	-0.0549501	0.136931	0.258483	1.1422e-12	0.203897	2.49959e-08	0.113732	0.00202839	0.623468	<1E-15	-0.0748229	0.0427114	-0.0606561	0.100583	0.36617	<1E-15	0.125247	0.000671704
43	IDL_P	0.0989613	0.00729386	0.112936	0.00218179	0.38701	<1E-15	0.428239	<1E-15	0.192798	1.41005e-07	0.0567619	0.124432	0.279374	1.24345e-14	0.371777	<1E-15	0.369066	<1E-15	0.323075	<1E-15	0.333425	<1E-15	0.593305	<1E-15	0.0957581	0.00943528	0.385278	<1E-15	0.345235	<1E-15	0.342291	<1E-15	0.244953	1.72209e-11	0.204632	2.22109e-08	0.223282	9.57575e-10	0.190235	2.0733e-07	0.286678	2.22045e-15	0.219752	1.77497e-09	0.166058	6.10599e-06	0.195561	9.25143e-08
44	IDL_L	0.0849968	0.0212781	0.10637	0.00391287	0.382142	<1E-15	0.417795	<1E-15	0.202644	3.05401e-08	0.0623498	0.0914165	0.276119	2.62013e-14	0.381584	<1E-15	0.371116	<1E-15	0.328185	<1E-15	0.334946	<1E-15	0.597211	<1E-15	0.0818318	0.0266256	0.38147	<1E-15	0.350213	<1E-15	0.353882	<1E-15	0.234399	1.28117e-10	0.195002	1.00798e-07	0.218535	2.19026e-09	0.162812	9.29071e-06	0.296285	2.22045e-16	0.226001	5.91178e-10	0.149266	4.91039e-05	0.188608	2.64097e-07
45	IDL_PL	0.0802382	0.0297316	0.113282	0.00211383	0.371767	<1E-15	0.390783	<1E-15	0.212128	6.49647e-09	0.0848707	0.0214717	0.278302	1.59872e-14	0.389384	<1E-15	0.370174	<1E-15	0.334101	<1E-15	0.327982	<1E-15	0.590971	<1E-15	0.0771526	0.0366354	0.351352	<1E-15	0.348065	<1E-15	0.356451	<1E-15	0.222373	1.1237e-09	0.191759	1.64963e-07	0.218218	2.31341e-09	0.107587	0.00351931	0.30278	<1E-15	0.229891	2.9329e-10	0.116567	0.00155884	0.188124	2.83719e-07
46	IDL_C	0.0458846	0.214362	0.0826561	0.0251318	0.371207	<1E-15	0.403219	<1E-15	0.217465	2.63249e-09	0.0629061	0.0885563	0.261129	6.5925e-13	0.399867	<1E-15	0.368542	<1E-15	0.335352	<1E-15	0.344074	<1E-15	0.600053	<1E-15	0.0444485	0.229069	0.386534	<1E-15	0.360929	<1E-15	0.38075	<1E-15	0.21036	8.71841e-09	0.167869	4.81448e-06	0.203938	2.48304e-08	0.116499	0.00156888	0.319415	<1E-15	0.236697	8.34373e-11	0.123625	0.000789392	0.163581	8.41673e-06
47	IDL_CE	0.0418288	0.257715	0.0742949	0.0442008	0.379002	<1E-15	0.423909	<1E-15	0.207779	1.33316e-08	0.0441247	0.232482	0.252762	3.66795e-12	0.393207	<1E-15	0.363764	<1E-15	0.328478	<1E-15	0.351283	<1E-15	0.597018	<1E-15	0.0421528	0.254044	0.412689	<1E-15	0.359009	<1E-15	0.379074	<1E-15	0.217865	2.45806e-09	0.16545	6.60971e-06	0.200717	4.14494e-08	0.152488	3.34631e-05	0.318851	<1E-15	0.230104	2.82125e-10	0.1504	4.29448e-05	0.157082	1.91103e-05
48	IDL_FC	0.0575892	0.119028	0.105478	0.00422607	0.34463	<1E-15	0.342541	<1E-15	0.236485	8.68119e-11	0.108343	0.00329339	0.27782	1.77636e-14	0.406291	<1E-15	0.373082	<1E-15	0.343502	<1E-15	0.317554	<1E-15	0.593557	<1E-15	0.0516869	0.161851	0.312714	<1E-15	0.359021	<1E-15	0.378059	<1E-15	0.188887	2.53422e-07	0.172746	2.50673e-06	0.210184	8.97601e-09	0.0224991	0.542794	0.314967	<1E-15	0.249115	7.60281e-12	0.0539708	0.144078	0.177173	1.36442e-06
49	IDL_TG	0.273701	4.44089e-14	0.18528	4.30484e-07	0.282783	5.77316e-15	0.383019	<1E-15	0.0236145	0.522971	-0.017221	0.641359	0.246337	1.31446e-11	0.0987163	0.00744073	0.218062	2.37623e-09	0.158438	1.61484e-05	0.145626	7.50273e-05	0.32908	<1E-15	0.274114	4.06342e-14	0.229364	3.22704e-10	0.144311	8.72253e-05	0.033695	0.361989	0.294944	4.44089e-16	0.278557	1.5099e-14	0.21318	5.44745e-09	0.466155	<1E-15	0.013188	0.721316	0.0522895	0.157009	0.290594	8.88178e-16	0.247709	1.00386e-11
50	L_LDL_P	0.0511205	0.166505	0.0877278	0.0174402	0.36921	<1E-15	0.409004	<1E-15	0.187158	3.27094e-07	0.0813813	0.027474	0.276725	2.26485e-14	0.384119	<1E-15	0.374675	<1E-15	0.333418	<1E-15	0.333204	<1E-15	0.591961	<1E-15	0.0524713	0.15557	0.358846	<1E-15	0.342816	<1E-15	0.346996	<1E-15	0.196755	7.69655e-08	0.167192	5.26314e-06	0.191749	1.65217e-07	0.126317	0.00060326	0.288444	1.55431e-15	0.217588	2.57793e-09	0.10521	0.00432456	0.159821	1.35789e-05
51	L_LDL_L	0.0412679	0.264158	0.0823722	0.0256378	0.363584	<1E-15	0.399927	<1E-15	0.190011	2.1439e-07	0.0846509	0.0218131	0.273183	4.9738e-14	0.387714	<1E-15	0.373176	<1E-15	0.335552	<1E-15	0.332034	<1E-15	0.590642	<1E-15	0.04141	0.262515	0.351665	<1E-15	0.343135	<1E-15	0.35123	<1E-15	0.187657	3.0393e-07	0.159663	1.3852e-05	0.187263	3.22111e-07	0.105853	0.00409193	0.292167	6.66134e-16	0.219929	1.72121e-09	0.0914838	0.0131568	0.153327	3.02459e-05
52	L_LDL_PL	0.0432986	0.241352	0.0912362	0.0134075	0.37332	<1E-15	0.409749	<1E-15	0.208176	1.24932e-08	0.0660016	0.0739303	0.254269	2.70495e-12	0.40278	<1E-15	0.369998	<1E-15	0.330541	<1E-15	0.343121	<1E-15	0.596792	<1E-15	0.0509654	0.167796	0.380685	<1E-15	0.353089	<1E-15	0.377066	<1E-15	0.214073	4.68721e-09	0.17049	3.39804e-06	0.206914	1.53514e-08	0.10863	0.00321125	0.317802	<1E-15	0.234965	1.15317e-10	0.122634	0.000870437	0.16451	7.46626e-06
53	L_LDL_C	0.0114841	0.756096	0.0610232	0.0985366	0.345937	<1E-15	0.378307	<1E-15	0.189029	2.48112e-07	0.094782	0.0101909	0.264276	3.40172e-13	0.388909	<1E-15	0.369201	<1E-15	0.337981	<1E-15	0.327103	<1E-15	0.581545	<1E-15	0.00745195	0.840268	0.334632	<1E-15	0.339651	<1E-15	0.352977	<1E-15	0.157154	1.89393e-05	0.135125	0.000241143	0.166253	5.95278e-06	0.0639814	0.0832323	0.292625	4.44089e-16	0.216898	2.90126e-09	0.054557	0.139766	0.12853	0.000481684
54	L_LDL_CE	0.00102719	0.977836	0.0482076	0.192031	0.34522	<1E-15	0.388342	<1E-15	0.176196	1.56258e-06	0.0873221	0.017969	0.261928	5.57776e-13	0.379771	<1E-15	0.365865	<1E-15	0.334528	<1E-15	0.328271	<1E-15	0.577022	<1E-15	-0.00265757	0.9427	0.342713	<1E-15	0.335028	<1E-15	0.344879	<1E-15	0.149838	4.58968e-05	0.12532	0.000666867	0.153514	2.95705e-05	0.0816164	0.0270284	0.285746	2.88658e-15	0.208549	1.17506e-08	0.057407	0.120202	0.116188	0.00161534
55	L_LDL_FC	0.0456043	0.217178	0.102332	0.00552039	0.346655	<1E-15	0.346421	<1E-15	0.227997	4.13205e-10	0.116312	0.0015966	0.272599	5.66214e-14	0.413109	<1E-15	0.377395	<1E-15	0.34635	<1E-15	0.322064	<1E-15	0.589928	<1E-15	0.0396375	0.28351	0.306345	<1E-15	0.351931	<1E-15	0.37471	<1E-15	0.18004	9.12662e-07	0.165966	6.17955e-06	0.205031	2.08286e-08	0.0128931	0.727297	0.311737	<1E-15	0.241933	3.08815e-11	0.0481753	0.192329	0.168041	4.70626e-06
56	L_LDL_TG	0.287204	2.22045e-15	0.227707	4.35365e-10	0.333097	<1E-15	0.38825	<1E-15	0.0994081	0.00703258	0.0252366	0.494819	0.2863	2.66454e-15	0.181606	7.30794e-07	0.268466	1.39e-13	0.203398	2.70736e-08	0.204977	2.10117e-08	0.405611	<1E-15	0.304808	<1E-15	0.265493	2.62901e-13	0.20883	1.12209e-08	0.124412	0.000730143	0.324072	<1E-15	0.303549	<1E-15	0.262211	5.25802e-13	0.406348	<1E-15	0.0977748	0.00803022	0.11993	0.00113222	0.292638	4.44089e-16	0.293905	4.44089e-16
57	M_LDL_P	0.0265816	0.472104	0.075105	0.0419332	0.352539	<1E-15	0.395874	<1E-15	0.169759	3.74694e-06	0.0989414	0.00730569	0.269552	1.10134e-13	0.378893	<1E-15	0.371214	<1E-15	0.330961	<1E-15	0.327125	<1E-15	0.574823	<1E-15	0.0317043	0.391059	0.327694	<1E-15	0.327003	<1E-15	0.332086	<1E-15	0.167811	4.8511e-06	0.149784	4.61935e-05	0.174712	1.91713e-06	0.096723	0.0087378	0.272209	6.17284e-14	0.206396	1.66995e-08	0.0652895	0.0771073	0.140018	0.000141387
58	M_LDL_L	0.020841	0.572936	0.0727548	0.0487975	0.348948	<1E-15	0.389803	<1E-15	0.173682	2.2071e-06	0.101481	0.00592731	0.26656	2.09166e-13	0.382678	<1E-15	0.370831	<1E-15	0.332165	<1E-15	0.327094	<1E-15	0.575057	<1E-15	0.0247293	0.503536	0.32412	<1E-15	0.327995	<1E-15	0.336391	<1E-15	0.162887	9.20169e-06	0.146005	7.18188e-05	0.173114	2.38459e-06	0.0823864	0.0256124	0.275163	3.21965e-14	0.208252	1.23384e-08	0.0567816	0.124301	0.136457	0.000208904
59	M_LDL_PL	0.0670076	0.0696247	0.115582	0.00170935	0.398241	<1E-15	0.457959	<1E-15	0.20171	3.54248e-08	0.0339275	0.358684	0.236386	8.84444e-11	0.404347	<1E-15	0.368442	<1E-15	0.312386	<1E-15	0.364062	<1E-15	0.594086	<1E-15	0.0929768	0.011731	0.430495	<1E-15	0.349389	<1E-15	0.379568	<1E-15	0.267166	1.83853e-13	0.202343	3.20397e-08	0.241596	3.29465e-11	0.194439	1.09869e-07	0.316993	<1E-15	0.234224	1.32329e-10	0.200902	4.02569e-08	0.18827	2.77665e-07
60	M_LDL_C	-0.01302	0.72472	0.0460159	0.213052	0.320781	<1E-15	0.353702	<1E-15	0.165756	6.35108e-06	0.117997	0.00136212	0.259708	8.85958e-13	0.375041	<1E-15	0.361348	<1E-15	0.33343	<1E-15	0.311581	<1E-15	0.555483	<1E-15	-0.0198314	0.59167	0.28563	3.10862e-15	0.315619	<1E-15	0.32488	<1E-15	0.114172	0.00194797	0.111781	0.00242312	0.139498	0.000149775	0.0230123	0.533627	0.265866	2.42695e-13	0.198145	6.20342e-08	-0.00477041	0.89734	0.103536	0.00498799
61	M_LDL_CE	-0.0297308	0.421233	0.0265539	0.472566	0.309049	<1E-15	0.344618	<1E-15	0.149664	4.68498e-05	0.122109	0.000916382	0.260496	7.52287e-13	0.360267	<1E-15	0.355594	<1E-15	0.330122	<1E-15	0.302052	<1E-15	0.543006	<1E-15	-0.0396392	0.283489	0.271924	6.57252e-14	0.305687	<1E-15	0.307573	<1E-15	0.0888007	0.016107	0.0922209	0.0124348	0.114847	0.00183007	0.0150274	0.684407	0.250595	5.66369e-12	0.184606	4.74736e-07	-0.0275425	0.456234	0.0832901	0.0240326
62	M_LDL_FC	0.0634114	0.0860215	0.134286	0.000263806	0.366175	<1E-15	0.381411	<1E-15	0.235442	1.05517e-10	0.0966034	0.00882167	0.248777	8.12905e-12	0.43527	<1E-15	0.381914	<1E-15	0.339492	<1E-15	0.35205	<1E-15	0.597428	<1E-15	0.0751242	0.0418806	0.344915	<1E-15	0.357205	<1E-15	0.399618	<1E-15	0.230558	2.59753e-10	0.201815	3.48385e-08	0.252649	3.75255e-12	0.0603169	0.102504	0.326863	<1E-15	0.255759	1.99751e-12	0.104327	0.00466365	0.198549	5.82493e-08
63	M_LDL_TG	0.246983	1.1579e-11	0.211453	7.27045e-09	0.333529	<1E-15	0.396249	<1E-15	0.108223	0.0033286	0.0336998	0.36192	0.28731	1.9984e-15	0.208446	1.19516e-08	0.281031	8.65974e-15	0.215926	3.42435e-09	0.231118	2.34502e-10	0.427423	<1E-15	0.287568	1.77636e-15	0.281266	8.21565e-15	0.22482	7.29527e-10	0.158651	1.57234e-05	0.309203	<1E-15	0.282029	6.88338e-15	0.253556	3.12506e-12	0.378841	<1E-15	0.121958	0.000930022	0.135742	0.000225666	0.275878	2.75335e-14	0.275378	3.06422e-14
64	S_LDL_P	0.0170849	0.643998	0.0769602	0.0371077	0.364407	<1E-15	0.416016	<1E-15	0.198952	5.4697e-08	0.0800438	0.0301308	0.252572	3.81073e-12	0.40826	<1E-15	0.37393	<1E-15	0.331997	<1E-15	0.350127	<1E-15	0.596939	<1E-15	0.0420533	0.255167	0.371187	<1E-15	0.348262	<1E-15	0.374083	<1E-15	0.194892	1.02513e-07	0.158041	1.69658e-05	0.198249	6.10373e-08	0.113713	0.0020319	0.303431	<1E-15	0.229703	3.03462e-10	0.0987238	0.0074362	0.146996	6.40363e-05
65	S_LDL_L	0.014038	0.704173	0.0781133	0.0343528	0.360466	<1E-15	0.407348	<1E-15	0.204283	2.34931e-08	0.0845541	0.0219649	0.250531	5.73674e-12	0.412915	<1E-15	0.37365	<1E-15	0.333978	<1E-15	0.349992	<1E-15	0.596582	<1E-15	0.0374485	0.310966	0.364406	<1E-15	0.348608	<1E-15	0.378273	<1E-15	0.191101	1.82121e-07	0.156611	2.02545e-05	0.199207	5.25578e-08	0.0966406	0.00879549	0.306693	<1E-15	0.232165	1.93524e-10	0.0883015	0.0167157	0.146255	6.97729e-05
66	S_LDL_PL	0.0739784	0.0451145	0.150462	4.2628e-05	0.411848	<1E-15	0.465045	<1E-15	0.272281	6.08402e-14	-0.000320601	0.993082	0.197006	7.40366e-08	0.4528	<1E-15	0.360446	<1E-15	0.301666	<1E-15	0.398326	<1E-15	0.61431	<1E-15	0.140462	0.000134582	0.494291	<1E-15	0.383616	<1E-15	0.459591	<1E-15	0.330174	<1E-15	0.233944	1.39384e-10	0.305246	<1E-15	0.197692	6.65666e-08	0.383814	<1E-15	0.288802	1.33227e-15	0.261217	6.4726e-13	0.227346	4.64569e-10
67	S_LDL_C	-0.0137129	0.710713	0.0544172	0.140785	0.326472	<1E-15	0.356381	<1E-15	0.190087	2.11975e-07	0.117395	0.00144196	0.251934	4.33209e-12	0.397244	<1E-15	0.365125	<1E-15	0.337102	<1E-15	0.323407	<1E-15	0.570957	<1E-15	-0.00907366	0.806136	0.297129	2.22045e-16	0.328075	<1E-15	0.350949	<1E-15	0.131267	0.000362859	0.121925	0.000933091	0.159903	1.34392e-05	0.0145896	0.693126	0.284813	3.55271e-15	0.215896	3.44167e-09	0.00473534	0.89809	0.114939	0.00181453
68	S_LDL_CE	-0.0337836	0.360727	0.0288459	0.435193	0.311709	<1E-15	0.341552	<1E-15	0.166235	5.96683e-06	0.130362	0.000398709	0.258303	1.18527e-12	0.37822	<1E-15	0.360711	<1E-15	0.336312	<1E-15	0.30776	<1E-15	0.553233	<1E-15	-0.0370015	0.316781	0.269476	1.1191e-13	0.313777	<1E-15	0.322734	<1E-15	0.0942571	0.010619	0.0952897	0.00979137	0.124812	0.000701614	-0.00166201	0.964146	0.262044	5.44453e-13	0.198427	5.93693e-08	-0.0290722	0.431598	0.087875	0.0172517
69	S_LDL_FC	0.0765452	0.0381439	0.164668	7.31503e-06	0.370758	<1E-15	0.398195	<1E-15	0.282211	6.66134e-15	0.0517055	0.1617	0.205641	1.88752e-08	0.458879	<1E-15	0.359743	<1E-15	0.318125	<1E-15	0.379057	<1E-15	0.604607	<1E-15	0.116489	0.00157031	0.40425	<1E-15	0.374214	<1E-15	0.45185	<1E-15	0.285364	3.10862e-15	0.232925	1.6826e-10	0.303889	<1E-15	0.0892954	0.015523	0.370858	<1E-15	0.280828	9.10383e-15	0.155492	2.32414e-05	0.228383	3.85417e-10
70	S_LDL_TG	0.142636	0.000105483	0.0780426	0.0345164	0.331112	<1E-15	0.514231	<1E-15	0.0509207	0.16817	-0.0905667	0.0141067	0.220142	1.6588e-09	0.173282	2.33094e-06	0.250065	6.29541e-12	0.179743	9.51854e-07	0.263113	4.34763e-13	0.417205	<1E-15	0.207189	1.46784e-08	0.444697	<1E-15	0.233461	1.52422e-10	0.161233	1.13616e-05	0.304889	<1E-15	0.218507	2.20084e-09	0.187302	3.20271e-07	0.574566	<1E-15	0.111231	0.00254655	0.0790151	0.0323217	0.393947	<1E-15	0.171218	3.08164e-06
71	XL_HDL_P	0.146529	6.75982e-05	0.187602	3.06428e-07	0.184217	5.0225e-07	0.0885067	0.0164631	0.383916	<1E-15	-0.0617615	0.0945216	0.0582895	0.114599	0.355292	<1E-15	0.171931	2.79921e-06	0.154535	2.6123e-05	0.20908	1.07696e-08	0.346378	<1E-15	0.193355	1.29593e-07	0.306778	<1E-15	0.293378	4.44089e-16	0.423207	<1E-15	0.341792	<1E-15	0.220225	1.63489e-09	0.327886	<1E-15	0.0338107	0.360341	0.328614	<1E-15	0.288266	1.77636e-15	0.321195	<1E-15	0.278969	1.37668e-14
72	XL_HDL_L	0.143612	9.44498e-05	0.186507	3.59872e-07	0.184742	4.65504e-07	0.0902739	0.0144223	0.385022	<1E-15	-0.0627624	0.0892883	0.0541502	0.142748	0.357758	<1E-15	0.170963	3.18904e-06	0.154305	2.68637e-05	0.211437	7.29025e-09	0.347758	<1E-15	0.190222	2.07737e-07	0.308398	<1E-15	0.293108	4.44089e-16	0.425778	<1E-15	0.340252	<1E-15	0.217692	2.53218e-09	0.327081	<1E-15	0.0328611	0.373997	0.330639	<1E-15	0.289765	1.11022e-15	0.320037	<1E-15	0.276703	2.28706e-14
73	XL_HDL_PL	0.176866	1.42401e-06	0.217858	2.46115e-09	0.155585	2.29787e-05	0.0192333	0.602899	0.386598	<1E-15	-0.0274983	0.456957	0.0795165	0.0312374	0.343814	<1E-15	0.171583	2.93408e-06	0.15379	2.85968e-05	0.163263	8.76839e-06	0.31184	<1E-15	0.213384	5.26341e-09	0.214515	4.34979e-09	0.273499	4.66294e-14	0.393023	<1E-15	0.333331	<1E-15	0.231714	2.10254e-10	0.33341	<1E-15	-0.0607032	0.100319	0.305856	<1E-15	0.286541	2.44249e-15	0.280313	1.02141e-14	0.299065	<1E-15
74	XL_HDL_C	0.102108	0.00562478	0.148725	5.23271e-05	0.193867	1.19877e-07	0.131689	0.000347193	0.365626	<1E-15	-0.0791946	0.0319298	0.0289686	0.433241	0.357429	<1E-15	0.161256	1.13288e-05	0.155376	2.35726e-05	0.239767	4.6724e-11	0.355947	<1E-15	0.15164	3.70468e-05	0.352573	<1E-15	0.29214	6.66134e-16	0.433701	<1E-15	0.311418	<1E-15	0.18496	4.50967e-07	0.297016	2.22045e-16	0.0832285	0.0241375	0.332956	<1E-15	0.278424	1.55431e-14	0.313551	<1E-15	0.234312	1.3019e-10
75	XL_HDL_CE	0.0852022	0.0209658	0.127556	0.000532053	0.188031	2.87634e-07	0.141191	0.00012407	0.353936	<1E-15	-0.0797645	0.0307127	0.0270413	0.464475	0.345602	<1E-15	0.155075	2.44566e-05	0.156125	2.15035e-05	0.240186	4.31362e-11	0.350717	<1E-15	0.134047	0.000270615	0.358541	<1E-15	0.288886	1.33227e-15	0.426722	<1E-15	0.293287	4.44089e-16	0.171599	2.92754e-06	0.279846	1.13243e-14	0.0977218	0.0080646	0.326999	<1E-15	0.266722	2.02061e-13	0.300487	<1E-15	0.215004	4.00462e-09
76	XL_HDL_FC	0.138966	0.000158821	0.195545	9.27409e-08	0.201176	3.85553e-08	0.104892	0.00444421	0.382959	<1E-15	-0.0797981	0.0306421	0.0373908	0.311713	0.377475	<1E-15	0.172415	2.622e-06	0.153684	2.8965e-05	0.228526	3.75591e-10	0.360798	<1E-15	0.186142	3.79655e-07	0.322218	<1E-15	0.294011	4.44089e-16	0.438254	<1E-15	0.346787	<1E-15	0.212855	5.75284e-09	0.33169	<1E-15	0.0396384	0.283499	0.339429	<1E-15	0.302461	<1E-15	0.336323	<1E-15	0.275195	3.19744e-14
77	XL_HDL_TG	0.0893727	0.0154335	0.0214821	0.561188	0.214331	4.4874e-09	0.344922	<1E-15	0.0964173	0.00895362	-0.184372	4.91095e-07	0.109744	0.00290925	0.160508	1.24537e-05	0.165346	6.6991e-06	0.127973	0.000509897	0.225986	5.92741e-10	0.315217	<1E-15	0.121591	0.000964007	0.499037	<1E-15	0.264822	3.02869e-13	0.248502	8.58336e-12	0.299329	<1E-15	0.181443	7.47884e-07	0.183453	5.60776e-07	0.561327	<1E-15	0.157291	1.86219e-05	0.0894138	0.015386	0.472559	<1E-15	0.144957	8.10114e-05
78	L_HDL_P	0.15349	2.96554e-05	0.2233	9.54586e-10	0.130532	0.000391758	0.00795525	0.82964	0.377812	<1E-15	-0.0900926	0.014621	0.0076552	0.835973	0.317698	<1E-15	0.095575	0.00957309	0.0751559	0.041794	0.157809	1.74636e-05	0.272938	5.26246e-14	0.241704	3.22711e-11	0.281497	7.77156e-15	0.295225	4.44089e-16	0.437544	<1E-15	0.34892	<1E-15	0.226052	5.85781e-10	0.34597	<1E-15	-0.0567516	0.1245	0.370077	<1E-15	0.324491	<1E-15	0.286693	2.22045e-15	0.295435	4.44089e-16
79	L_HDL_L	0.149903	4.55464e-05	0.221196	1.38072e-09	0.125684	0.000642907	0.00147243	0.968234	0.37813	<1E-15	-0.088407	0.0165854	0.00602734	0.870504	0.317849	<1E-15	0.0936544	0.0111303	0.0753101	0.0413747	0.15578	2.24338e-05	0.270036	9.90319e-14	0.237858	6.70743e-11	0.274281	3.90799e-14	0.292549	4.44089e-16	0.436546	<1E-15	0.342766	<1E-15	0.221253	1.36699e-09	0.342508	<1E-15	-0.0658321	0.0746764	0.368365	<1E-15	0.324171	<1E-15	0.279423	1.24345e-14	0.291542	8.88178e-16
80	L_HDL_PL	0.126352	0.00060111	0.207763	1.33658e-08	0.147335	6.15641e-05	0.0263876	0.475344	0.386298	<1E-15	-0.0807796	0.0286431	0.00694489	0.851006	0.339143	<1E-15	0.111257	0.0025407	0.0900469	0.0146713	0.177335	1.33408e-06	0.301243	<1E-15	0.222332	1.1318e-09	0.302483	<1E-15	0.314848	<1E-15	0.464068	<1E-15	0.336679	<1E-15	0.210806	8.09598e-09	0.333907	<1E-15	-0.0777514	0.035198	0.400983	<1E-15	0.34639	<1E-15	0.267672	1.64979e-13	0.281471	7.77156e-15
81	L_HDL_C	0.150302	4.34442e-05	0.219213	1.94836e-09	0.096757	0.00871406	-0.0356477	0.334824	0.369185	<1E-15	-0.086294	0.0193721	-0.00261333	0.943652	0.301666	<1E-15	0.0748964	0.0425075	0.0623587	0.0913704	0.133452	0.000288281	0.238096	6.41207e-11	0.230639	2.55902e-10	0.230341	2.70191e-10	0.262765	4.6807e-13	0.408803	<1E-15	0.322561	<1E-15	0.206478	1.64792e-08	0.329818	<1E-15	-0.0871826	0.0181539	0.338567	<1E-15	0.304971	<1E-15	0.262198	5.27134e-13	0.279344	1.26565e-14
82	L_HDL_CE	0.153876	2.83019e-05	0.220448	1.57297e-09	0.0997789	0.00682219	-0.030855	0.403881	0.366514	<1E-15	-0.0923591	0.0123034	-0.0047128	0.898573	0.297717	2.22045e-16	0.0727059	0.0489499	0.0585965	0.112699	0.13303	0.000301455	0.235462	1.05127e-10	0.235607	1.02304e-10	0.237366	7.35825e-11	0.261427	6.19504e-13	0.406914	<1E-15	0.329469	<1E-15	0.20955	9.96683e-09	0.332203	<1E-15	-0.074501	0.0436143	0.337141	<1E-15	0.303004	<1E-15	0.274964	3.37508e-14	0.281418	7.99361e-15
83	L_HDL_FC	0.134905	0.000246904	0.212792	5.81315e-09	0.0865641	0.0189944	-0.050773	0.169409	0.374846	<1E-15	-0.0666188	0.0712638	0.00647046	0.861077	0.313868	<1E-15	0.0836489	0.0234291	0.0769887	0.0370373	0.135783	0.000224679	0.247344	1.07856e-11	0.21115	7.64716e-09	0.206812	1.5609e-08	0.266818	1.98064e-13	0.414584	<1E-15	0.295296	4.44089e-16	0.192565	1.46069e-07	0.318285	<1E-15	-0.129853	0.000420326	0.341228	<1E-15	0.308921	<1E-15	0.216048	3.35418e-09	0.267539	1.69642e-13
84	L_HDL_TG	0.271536	7.14984e-14	0.223017	1.0033e-09	0.161486	1.10018e-05	0.201468	3.68123e-08	0.183017	5.97115e-07	-0.138789	0.000161946	0.100873	0.00623393	0.139672	0.000146906	0.128179	0.000499289	0.0676222	0.0670969	0.163279	8.74998e-06	0.227671	4.38181e-10	0.321445	<1E-15	0.37374	<1E-15	0.276668	2.30926e-14	0.268605	1.35003e-13	0.442192	<1E-15	0.371212	<1E-15	0.376219	<1E-15	0.372028	<1E-15	0.181852	7.05541e-07	0.140905	0.000128108	0.455834	<1E-15	0.345033	<1E-15
85	M_HDL_P	0.00684265	0.853174	0.10784	0.00344245	0.203743	2.56215e-08	0.198239	6.11303e-08	0.290058	1.11022e-15	-0.188244	2.7873e-07	-0.101064	0.00613601	0.262086	5.39568e-13	0.0487731	0.186863	0.0101071	0.784572	0.219174	1.9618e-09	0.276905	2.17604e-14	0.164848	7.14633e-06	0.459562	<1E-15	0.291157	8.88178e-16	0.438735	<1E-15	0.317886	<1E-15	0.147666	5.92339e-05	0.247665	1.01268e-11	0.0602332	0.102983	0.431189	<1E-15	0.319657	<1E-15	0.328165	<1E-15	0.176623	1.4728e-06
86	M_HDL_L	0.00261508	0.943614	0.108732	0.00318242	0.197044	7.35967e-08	0.185312	4.28484e-07	0.294825	4.44089e-16	-0.182243	6.67195e-07	-0.101786	0.00577857	0.267567	1.68754e-13	0.0471196	0.202268	0.0105298	0.775797	0.217732	2.51477e-09	0.276568	2.35367e-14	0.160104	1.31037e-05	0.44657	<1E-15	0.29106	8.88178e-16	0.442175	<1E-15	0.309305	<1E-15	0.142531	0.000106742	0.246012	1.40061e-11	0.0374025	0.311561	0.432101	<1E-15	0.32268	<1E-15	0.312021	<1E-15	0.174182	2.0613e-06
87	M_HDL_PL	0.0454429	0.218811	0.138019	0.000176227	0.242579	2.7276e-11	0.219628	1.81345e-09	0.308435	<1E-15	-0.173749	2.1872e-06	-0.0853353	0.0207656	0.280413	9.99201e-15	0.0738489	0.0454928	0.0267067	0.470021	0.232155	1.93885e-10	0.299867	<1E-15	0.199891	4.72057e-08	0.483244	<1E-15	0.303848	<1E-15	0.452753	<1E-15	0.360926	<1E-15	0.185592	4.11343e-07	0.284476	3.9968e-15	0.0918419	0.0128015	0.447462	<1E-15	0.334456	<1E-15	0.369222	<1E-15	0.216729	2.98629e-09
88	M_HDL_C	-0.0342837	0.353657	0.0942249	0.0106458	0.135625	0.000228538	0.106254	0.00395239	0.29071	8.88178e-16	-0.160794	1.20107e-05	-0.111256	0.0025408	0.262429	5.02043e-13	0.02064	0.576643	0.000782853	0.983107	0.187194	3.25395e-07	0.242595	2.71896e-11	0.115701	0.00169039	0.360646	<1E-15	0.266276	2.22489e-13	0.430126	<1E-15	0.236963	7.93758e-11	0.0911689	0.0134764	0.207126	1.48311e-08	-0.0766001	0.0380055	0.41197	<1E-15	0.316571	<1E-15	0.212249	6.36658e-09	0.136498	0.000207979
89	M_HDL_CE	-0.0467132	0.206191	0.0824915	0.0254242	0.117753	0.00139389	0.0905747	0.0140981	0.281094	8.43769e-15	-0.164907	7.09271e-06	-0.119237	0.00121017	0.250201	6.12754e-12	0.0065894	0.85855	-0.00855066	0.817107	0.176968	1.40395e-06	0.224698	7.45461e-10	0.101341	0.00599663	0.346745	<1E-15	0.253745	3.00782e-12	0.418317	<1E-15	0.218126	2.35014e-09	0.0732203	0.0473677	0.189801	2.21223e-07	-0.08947	0.0153213	0.401338	<1E-15	0.306892	<1E-15	0.197051	7.35185e-08	0.120187	0.00110452
90	M_HDL_FC	0.0218341	0.554788	0.139326	0.000152646	0.199347	5.14159e-08	0.16165	1.07751e-05	0.322963	<1E-15	-0.14221	0.000110676	-0.0791344	0.0320609	0.300328	<1E-15	0.0718705	0.0516131	0.0363449	0.32545	0.220642	1.52077e-09	0.302775	<1E-15	0.17157	2.93908e-06	0.406229	<1E-15	0.303279	<1E-15	0.461519	<1E-15	0.309805	<1E-15	0.161711	1.06923e-05	0.272594	5.68434e-14	-0.0281775	0.445912	0.443076	<1E-15	0.344769	<1E-15	0.267939	1.55875e-13	0.200313	4.4177e-08
91	M_HDL_TG	0.0820042	0.0263071	0.000439585	0.990514	0.223388	9.39835e-10	0.420066	<1E-15	-0.0853052	0.0208107	-0.223655	8.96554e-10	-0.00272874	0.941168	-0.0663465	0.0724304	0.0376855	0.307911	-0.0294198	0.42611	0.124107	0.000752578	0.0955913	0.00956073	0.1422	0.000110804	0.458539	<1E-15	0.095146	0.00990302	0.0195629	0.596698	0.304538	<1E-15	0.165767	6.34226e-06	0.100674	0.00633744	0.591472	<1E-15	0.0680828	0.0652526	-0.0168235	0.649077	0.48322	<1E-15	0.0893932	0.0154098
92	S_HDL_P	0.0997394	0.00684435	0.18743	3.14302e-07	0.221305	1.35465e-09	0.221342	1.34603e-09	0.148889	5.13307e-05	-0.0570285	0.12267	-0.0519624	0.159624	0.159336	1.44317e-05	0.0785565	0.0333413	0.00604238	0.870184	0.190547	1.97875e-07	0.176219	1.55761e-06	0.216631	3.03664e-09	0.2807	9.32587e-15	0.153601	2.92587e-05	0.238368	6.09162e-11	0.296038	2.22045e-16	0.221369	1.33962e-09	0.258249	1.19837e-12	0.0576264	0.11879	0.272797	5.41789e-14	0.209026	1.08657e-08	0.227496	4.52235e-10	0.220486	1.56237e-09
93	S_HDL_L	0.0996601	0.00688899	0.194082	1.16012e-07	0.216656	3.02356e-09	0.209702	9.72064e-09	0.161955	1.03645e-05	-0.0437109	0.236896	-0.0450371	0.222957	0.173275	2.33299e-06	0.0866155	0.0189233	0.0153383	0.678239	0.19355	1.2581e-07	0.186135	3.79997e-07	0.21502	3.99393e-09	0.266552	2.0961e-13	0.1607	1.2154e-05	0.249201	7.4738e-12	0.291119	8.88178e-16	0.222826	1.03767e-09	0.263638	3.89244e-13	0.026151	0.479314	0.278828	1.42109e-14	0.217289	2.71352e-09	0.207455	1.40554e-08	0.224139	8.23039e-10
94	S_HDL_PL	0.0153687	0.677637	0.0551699	0.135365	0.148044	5.66729e-05	0.197222	7.16027e-08	0.0856678	0.0202727	-0.257634	1.36047e-12	-0.219638	1.81016e-09	0.0306694	0.406715	-0.102828	0.00529535	-0.143558	9.50357e-05	0.100351	0.00650843	0.0338977	0.359107	0.162057	1.02313e-05	0.390893	<1E-15	0.0877295	0.017438	0.204286	2.34835e-08	0.281146	8.43769e-15	0.114542	0.00188252	0.165878	6.25146e-06	0.246382	1.30291e-11	0.243069	2.48157e-11	0.154752	2.54413e-05	0.384727	<1E-15	0.117124	0.00147934
95	S_HDL_C	0.102267	0.00555078	0.225098	6.94302e-10	0.168767	4.27519e-06	0.100616	0.00636763	0.172869	2.46556e-06	0.173792	2.17441e-06	0.122425	0.000888457	0.257629	1.36158e-12	0.215629	3.6016e-09	0.165058	6.95507e-06	0.16762	4.97508e-06	0.26395	3.64597e-13	0.138131	0.000174078	0.015032	0.684316	0.160798	1.20042e-05	0.216899	2.9007e-09	0.152314	3.4173e-05	0.199428	5.07699e-08	0.234684	1.21513e-10	-0.268021	1.52989e-13	0.215088	3.9483e-09	0.196201	8.3836e-08	-0.089841	0.0149005	0.2096	9.88481e-09
96	S_HDL_CE	0.0818068	0.0266721	0.195814	8.89911e-08	0.154357	2.66935e-05	0.070214	0.0572532	0.148894	5.12992e-05	0.226059	5.85041e-10	0.159403	1.43116e-05	0.247667	1.0123e-11	0.234179	1.33443e-10	0.190567	1.97285e-07	0.149492	4.78154e-05	0.257928	1.28031e-12	0.0893377	0.015474	-0.0489219	0.185521	0.14287	0.000102731	0.17931	1.01171e-06	0.091463	0.0131777	0.165167	6.85705e-06	0.189939	2.1671e-07	-0.319956	<1E-15	0.177354	1.33044e-06	0.171121	3.12224e-06	-0.165494	6.57202e-06	0.175346	1.75694e-06
97	S_HDL_FC	0.13975	0.000145651	0.226439	5.46623e-10	0.164301	7.67126e-06	0.167558	5.01561e-06	0.167782	4.87007e-06	-0.184876	4.56484e-07	-0.138726	0.000163075	0.120768	0.00104421	-0.0242738	0.51143	-0.0775726	0.035622	0.150841	4.0748e-05	0.12303	0.000837191	0.296162	2.22045e-16	0.32063	<1E-15	0.146108	7.09725e-05	0.273355	4.79616e-14	0.359131	<1E-15	0.247304	1.08713e-11	0.312494	<1E-15	0.164873	7.1233e-06	0.274631	3.61933e-14	0.226676	5.23913e-10	0.347233	<1E-15	0.258135	1.22702e-12
98	S_HDL_TG	0.162914	9.16933e-06	0.0495792	0.179674	0.134418	0.000260123	0.324407	<1E-15	-0.193214	1.32394e-07	-0.103943	0.00481855	0.0541301	0.142896	-0.171567	2.94008e-06	0.0210081	0.569862	-0.051845	0.16057	0.0312264	0.398243	-0.0353219	0.339262	0.200103	4.56583e-08	0.186163	3.78481e-07	-0.0621305	0.0925642	-0.194609	1.07042e-07	0.200296	4.42982e-08	0.169684	3.78453e-06	0.0653114	0.0770077	0.601053	<1E-15	-0.158208	1.66167e-05	-0.165421	6.63438e-06	0.355134	<1E-15	0.084612	0.021874
99	XXL_VLDL_PL_pct	-0.0525026	0.232918	-0.0631977	0.150912	0.110689	0.0117052	0.239221	3.5549e-08	-0.0180653	0.68166	-0.204607	2.66233e-06	-0.0254664	0.563062	0.0590496	0.179638	-0.0222854	0.612825	0.0093129	0.832536	0.130373	0.00295136	0.116531	0.00793461	0.116975	0.00769842	0.412697	<1E-15	0.0862793	0.0496925	0.0839237	0.0562847	0.116539	0.00793025	-0.020034	0.649173	-0.000840144	0.984781	0.563116	<1E-15	0.0549517	0.211811	0.0569467	0.195664	0.307202	8.7752e-13	-0.0213973	0.627057
100	XXL_VLDL_C_pct	0.231457	9.94859e-08	0.183907	2.53665e-05	0.0828053	0.0596599	0.177699	4.76229e-05	-0.0363972	0.40843	-0.0374645	0.394815	0.140165	0.00138288	-0.0667734	0.129075	0.0913639	0.037642	0.0148716	0.735609	0.0764066	0.0823299	0.110375	0.0119468	0.183632	2.60965e-05	0.125119	0.00434447	0.0423589	0.335962	-0.044093	0.316536	0.162658	0.00020091	0.229693	1.25064e-07	0.158873	0.000283173	0.29604	6.14686e-12	-0.0832196	0.0583906	-0.0737794	0.0934604	0.101007	0.0214934	0.178531	4.38193e-05
101	XXL_VLDL_CE_pct	0.197852	5.7038e-06	0.173286	7.35717e-05	0.108316	0.013643	0.130194	0.00299105	0.00897695	0.838492	0.0831707	0.0585391	0.187782	1.69387e-05	-0.00670095	0.879073	0.149632	0.000634121	0.0639278	0.14624	0.0897208	0.0412314	0.170067	0.000100381	0.096379	0.0282816	0.0537008	0.222412	0.0744881	0.0903453	-0.00358227	0.935176	0.0977273	0.0261358	0.194969	7.83396e-06	0.133469	0.00233455	0.0829021	0.0593612	-0.0396036	0.368366	-0.0450243	0.306413	-0.0400595	0.362874	0.157056	0.000332977
102	XXL_VLDL_FC_pct	0.133934	0.00225292	0.0707714	0.107648	0.0451443	0.305124	0.193285	9.41005e-06	-0.121157	0.00576247	-0.232316	8.89311e-08	-0.0337786	0.442993	-0.151334	0.000548426	-0.0700947	0.111063	-0.0778884	0.0765411	0.035089	0.425492	-0.0450067	0.306602	0.200156	4.41097e-06	0.255447	3.68006e-09	-0.0112274	0.798783	-0.068415	0.119908	0.160678	0.00024064	0.114509	0.00909458	0.0673762	0.125648	0.598463	<1E-15	-0.100211	0.0225489	-0.0582217	0.185827	0.324426	3.68594e-14	0.0766831	0.0812238
103	XXL_VLDL_TG_pct	-0.19538	7.48985e-06	-0.14528	0.000912734	-0.130475	0.00292886	-0.258833	2.24663e-09	0.0483844	0.271684	0.0934557	0.0334588	-0.123279	0.00495831	0.0290719	0.509121	-0.0843167	0.055137	-0.0385579	0.381156	-0.127097	0.00376218	-0.147152	0.000781275	-0.20759	1.88607e-06	-0.26242	1.32159e-09	-0.093833	0.0327482	-0.00305679	0.944669	-0.196151	6.88264e-06	-0.214517	8.3074e-07	-0.155343	0.000387341	-0.467822	<1E-15	0.0413332	0.347805	0.0262116	0.551692	-0.199991	4.49343e-06	-0.160449	0.000245682
104	XL_VLDL_PL_pct	-0.0642757	0.154577	-0.126562	0.00493179	0.200865	7.12515e-06	0.314464	9.37916e-13	-0.00688309	0.87896	-0.118986	0.008244	0.134666	0.00276171	0.105505	0.0192424	0.128483	0.00431082	0.0962186	0.0328628	0.222428	6.238e-07	0.258414	6.01256e-09	0.00716587	0.874028	0.424316	<1E-15	0.173197	0.000112861	0.132812	0.00316225	0.0284758	0.528599	-0.0560983	0.214188	-0.0471299	0.296803	0.518699	<1E-15	0.114628	0.0109435	0.112241	0.0127322	0.184632	3.78229e-05	-0.0602074	0.182441
105	XL_VLDL_C_pct	0.0325685	0.471059	-0.0131412	0.771237	0.00390179	0.931207	0.0661438	0.142917	-0.0394952	0.382032	0.0177927	0.693812	0.140021	0.00185032	-0.0152968	0.735019	0.0633995	0.160288	0.0321859	0.476288	0.104687	0.0202031	0.114374	0.011123	-0.00869304	0.84748	0.105461	0.0192934	0.101164	0.024834	0.0253504	0.574826	-0.0254917	0.572695	0.0465782	0.302501	0.0145251	0.747923	0.21875	9.62107e-07	-0.0585197	0.195031	-0.0268124	0.552966	-0.0612008	0.175317	0.0129181	0.775015
106	XL_VLDL_CE_pct	0.0399746	0.376277	0.0465461	0.302834	-0.120808	0.00730396	-0.170846	0.000140125	-0.0314114	0.486969	0.153807	0.000618616	0.0628309	0.164077	-0.108813	0.0157511	0.0153067	0.734854	-0.00207909	0.963311	-0.0533575	0.237461	-0.0548513	0.224564	-0.0878553	0.0514707	-0.223997	5.17276e-07	-0.00976138	0.829009	-0.089953	0.0461276	-0.0967443	0.0319154	0.0712173	0.114643	0.0126825	0.779012	-0.207459	3.475e-06	-0.128053	0.00444338	-0.11289	0.0122224	-0.297391	1.66658e-11	0.0223235	0.621334
107	XL_VLDL_FC_pct	-0.0338356	0.453968	-0.104322	0.0206459	0.130466	0.0037446	0.244569	3.9146e-08	-0.0131011	0.771916	-0.156397	0.000498282	0.0941663	0.0367945	0.0628612	0.163874	0.0689509	0.126678	0.0555605	0.218619	0.198012	9.65118e-06	0.195604	1.24276e-05	0.0226245	0.616637	0.375746	<1E-15	0.148478	0.000955366	0.11657	0.00965645	0.020449	0.650927	-0.0419779	0.352808	-0.033579	0.457401	0.523489	<1E-15	0.0757853	0.0931251	0.0796563	0.0775347	0.184221	3.93836e-05	-0.0474055	0.293984
108	XL_VLDL_TG_pct	0.00254041	0.955178	0.0686676	0.128249	-0.116348	0.00979659	-0.213146	1.83568e-06	0.0251058	0.578522	0.0348106	0.441059	-0.173176	0.000113079	-0.0576422	0.201823	-0.124219	0.00579791	-0.0812469	0.071776	-0.19486	1.34286e-05	-0.218668	9.71416e-07	-0.00228766	0.959633	-0.266929	1.79664e-09	-0.167813	0.000184486	-0.0968191	0.0317825	-0.007615	0.866204	-0.0182157	0.686912	-0.00400582	0.929378	-0.382617	<1E-15	-0.016203	0.719962	-0.0393209	0.384137	-0.0488097	0.279901	0.00737912	0.870312
109	L_VLDL_PL_pct	0.127656	0.00140822	0.0598377	0.135729	0.308762	3.10862e-15	0.4026	<1E-15	0.00523441	0.896258	0.0699244	0.0811693	0.268805	8.9877e-12	0.149836	0.000174308	0.278705	1.40754e-12	0.193008	1.21295e-06	0.212457	8.6271e-08	0.377873	<1E-15	0.0889262	0.0264503	0.294315	6.4837e-14	0.206819	1.90637e-07	0.0960082	0.0165259	0.135803	0.000677323	0.140314	0.000443774	0.0939137	0.0190496	0.383356	<1E-15	0.0645352	0.107564	0.0957349	0.0168377	0.141331	0.000402688	0.111513	0.00532856
110	L_VLDL_C_pct	0.176499	9.36198e-06	0.103781	0.00953726	0.109894	0.00603685	0.178646	7.25121e-06	0.0123013	0.759273	0.0226896	0.571892	0.158798	6.86486e-05	-0.0221454	0.581151	0.0947579	0.0179946	0.0960379	0.0164924	0.124333	0.001876	0.144178	0.000305815	0.124087	0.00191573	0.161391	5.19263e-05	0.149581	0.000178862	0.0406733	0.310781	0.238813	1.57653e-09	0.281963	7.52065e-13	0.214805	6.16008e-08	0.26447	1.97717e-11	-0.00540329	0.892931	-0.0203086	0.612902	0.144919	0.000284437	0.173938	1.26495e-05
111	L_VLDL_CE_pct	0.190112	1.75887e-06	0.196013	8.19927e-07	-0.0574497	0.152074	-0.152306	0.000135524	0.0823534	0.0398886	0.191627	1.44921e-06	0.116312	0.00364697	0.031	0.439883	0.0576583	0.150589	0.099743	0.0127457	0.0178805	0.656004	0.0420617	0.29454	0.091463	0.0224235	-0.258531	5.68958e-11	0.058243	0.146486	0.0143645	0.720467	0.0993973	0.0130603	0.257261	7.1086e-11	0.220955	2.5043e-08	-0.353106	<1E-15	-0.0183707	0.647203	-0.00620735	0.877116	-0.205682	2.23106e-07	0.185104	3.30049e-06
112	L_VLDL_FC_pct	-0.0534934	0.182378	-0.126867	0.00150832	0.16379	3.99523e-05	0.363435	<1E-15	-0.0893156	0.0257943	-0.201858	3.76148e-07	0.00570282	0.887035	-0.0461322	0.250244	0.0229052	0.568244	0.0104652	0.794328	0.112871	0.00479303	0.104982	0.00873285	-0.0100997	0.80136	0.460865	<1E-15	0.0957425	0.0168289	0.0375221	0.349789	0.109757	0.00610067	-0.0158955	0.69212	-0.0390642	0.330328	0.659685	<1E-15	0.0128496	0.748897	-0.0206565	0.606829	0.358488	<1E-15	-0.0648966	0.105605
113	L_VLDL_TG_pct	-0.204321	2.6899e-07	-0.115817	0.00379489	-0.192133	1.35796e-06	-0.281559	8.13127e-13	-0.0297975	0.457836	-0.0375753	0.349106	-0.22448	1.47707e-08	-0.0367104	0.360318	-0.174156	1.23315e-05	-0.151258	0.000150863	-0.17902	6.93327e-06	-0.248648	3.11613e-10	-0.140411	0.000439684	-0.226096	1.15614e-08	-0.189858	1.81678e-06	-0.07674	0.0555686	-0.2469	4.17866e-10	-0.281896	7.61835e-13	-0.218475	3.61144e-08	-0.32978	<1E-15	-0.0243162	0.544647	-0.0271036	0.499504	-0.169416	2.12929e-05	-0.192945	1.22292e-06
114	M_VLDL_PL_pct	0.217156	2.84545e-09	0.28215	7.10543e-15	0.0739267	0.0454125	-0.147575	6.05657e-05	0.204616	2.27667e-08	0.277845	1.84297e-14	0.19516	1.00385e-07	0.21231	6.45374e-09	0.158121	1.70234e-05	0.179273	1.03439e-06	0.0444898	0.228955	0.200006	4.73474e-08	0.179355	1.02257e-06	-0.234631	1.26317e-10	0.117641	0.00141945	0.126726	0.000583902	0.0621223	0.0928311	0.18678	3.52188e-07	0.215837	3.56263e-09	-0.436786	<1E-15	0.131326	0.000364011	0.175794	1.67893e-06	-0.278074	1.75415e-14	0.230568	2.66607e-10
115	M_VLDL_C_pct	0.189643	2.30811e-07	0.160843	1.21014e-05	0.259239	1.01208e-12	0.305977	<1E-15	0.137834	0.000181668	0.0275702	0.456089	0.243233	2.47997e-11	0.20449	2.32295e-08	0.270472	9.37028e-14	0.24212	3.07236e-11	0.242918	2.63554e-11	0.403686	<1E-15	0.164668	7.42104e-06	0.278537	1.57652e-14	0.284489	3.9968e-15	0.229613	3.17138e-10	0.29396	4.44089e-16	0.298819	<1E-15	0.269334	1.19904e-13	0.191328	1.7945e-07	0.172057	2.79552e-06	0.122514	0.000887955	0.174554	1.99072e-06	0.242342	2.94436e-11
116	M_VLDL_CE_pct	0.161798	1.07215e-05	0.169119	4.14211e-06	0.20798	1.31978e-08	0.154897	2.53155e-05	0.177007	1.41954e-06	0.125739	0.000644925	0.238281	6.3805e-11	0.238036	6.68168e-11	0.269408	1.17906e-13	0.263845	3.8658e-13	0.203805	2.59264e-08	0.364093	<1E-15	0.100185	0.00663523	0.134352	0.000264522	0.27209	6.57252e-14	0.240467	4.2149e-11	0.21644	3.2153e-09	0.261703	6.06182e-13	0.253575	3.22009e-12	-0.0728569	0.0486348	0.190451	2.04625e-07	0.149884	4.61991e-05	0.0103817	0.779016	0.229175	3.43312e-10
117	M_VLDL_FC_pct	0.10327	0.0051316	0.00400551	0.913789	0.212571	6.17802e-09	0.459727	<1E-15	-0.0733327	0.0471788	-0.248938	8.13483e-12	0.0488678	0.186309	-0.0136961	0.71124	0.0735433	0.0465461	0.0115092	0.755741	0.137733	0.000183692	0.196834	7.75969e-08	0.180014	9.3194e-07	0.462319	<1E-15	0.105047	0.00441248	0.0313848	0.396176	0.269525	1.15019e-13	0.150679	4.20476e-05	0.0949444	0.0101128	0.72995	<1E-15	0.00779722	0.833087	-0.0446242	0.22755	0.487312	<1E-15	0.0788938	0.0327077
118	M_VLDL_TG_pct	-0.216778	3.03542e-09	-0.207789	1.36155e-08	-0.259323	9.94538e-13	-0.248582	8.72857e-12	-0.169252	4.06973e-06	-0.0821251	0.0261879	-0.267174	1.90514e-13	-0.235639	1.04724e-10	-0.283776	4.88498e-15	-0.267117	1.92957e-13	-0.232831	1.76156e-10	-0.415688	<1E-15	-0.187297	3.26463e-07	-0.210014	9.44828e-09	-0.287015	2.22045e-15	-0.245531	1.58842e-11	-0.284321	4.21885e-15	-0.312947	<1E-15	-0.295031	4.44089e-16	-0.0809811	0.028355	-0.191908	1.64469e-07	-0.153035	3.17243e-05	-0.0999647	0.00675658	-0.273288	5.06262e-14
119	S_VLDL_PL_pct	0.0758151	0.0425552	0.161168	1.46841e-05	-0.128702	0.0005561	-0.382078	<1E-15	0.150387	5.3441e-05	0.127608	0.000620262	-0.128434	0.000571219	0.0113863	0.76101	-0.15	5.58851e-05	-0.0919414	0.0138511	-0.124851	0.000813768	-0.172975	3.23132e-06	0.0953529	0.0106852	-0.300208	2.22045e-16	-0.0691862	0.0642733	0.0371664	0.320656	-0.0146175	0.696185	0.0222753	0.551791	0.0876374	0.0190049	-0.500073	<1E-15	0.0736889	0.0487219	0.115959	0.00188406	-0.206599	2.42113e-08	0.091756	0.0140448
120	S_VLDL_C_pct	0.109791	0.00326553	0.119509	0.00135657	0.250298	1.08877e-11	0.250951	9.58678e-12	0.183602	7.56025e-07	0.149353	6.02211e-05	0.291023	1.77636e-15	0.280585	2.02061e-14	0.325251	<1E-15	0.310787	<1E-15	0.249259	1.33193e-11	0.452256	<1E-15	0.075495	0.0434392	0.20195	5.01882e-08	0.290028	2.44249e-15	0.25735	2.70428e-12	0.18092	1.09971e-06	0.221671	2.0235e-09	0.217563	4.05298e-09	-0.00954791	0.798689	0.213375	8.11384e-09	0.175083	2.4389e-06	-0.0159572	0.669914	0.197607	9.76592e-08
121	S_VLDL_CE_pct	0.0724031	0.0528027	0.0825929	0.0271085	0.235884	1.64593e-10	0.235632	1.72315e-10	0.165519	8.50764e-06	0.157291	2.35984e-05	0.284638	8.21565e-15	0.266501	4.16334e-13	0.317104	<1E-15	0.308876	<1E-15	0.242562	4.77915e-11	0.433099	<1E-15	0.0262311	0.483434	0.185145	6.07921e-07	0.276314	5.15143e-14	0.240863	6.56986e-11	0.13437	0.000311468	0.180249	1.20685e-06	0.174283	2.71465e-06	-0.0384608	0.30408	0.201748	5.17897e-08	0.161156	1.47056e-05	-0.0536738	0.151362	0.157286	2.36129e-05
122	S_VLDL_FC_pct	0.336646	<1E-15	0.344271	<1E-15	0.239621	8.2768e-11	0.217428	4.14539e-09	0.226649	8.56372e-10	-1.3404e-05	0.999714	0.183665	7.49362e-07	0.22045	2.49121e-09	0.193133	1.90923e-07	0.145257	9.59047e-05	0.182494	8.83178e-07	0.359081	<1E-15	0.425879	<1E-15	0.224959	1.14926e-09	0.240724	6.7425e-11	0.236757	1.40327e-10	0.4438	<1E-15	0.421616	<1E-15	0.432139	<1E-15	0.210365	1.3246e-08	0.17564	2.26284e-06	0.200966	5.84365e-08	0.276234	5.24025e-14	0.403587	<1E-15
123	S_VLDL_TG_pct	-0.137738	0.000218327	-0.174534	2.62504e-06	-0.227731	7.08416e-10	-0.155952	2.77287e-05	-0.24924	1.33686e-11	-0.192464	2.10756e-07	-0.265122	5.54445e-13	-0.306087	<1E-15	-0.305705	<1E-15	-0.300099	2.22045e-16	-0.222861	1.6507e-09	-0.428464	<1E-15	-0.110268	0.00313244	-0.126735	0.000676371	-0.291489	1.77636e-15	-0.282643	1.28786e-14	-0.192914	1.97204e-07	-0.245333	2.82987e-11	-0.258691	2.06501e-12	0.160411	1.6123e-05	-0.253842	5.4361e-12	-0.216235	5.05842e-09	0.0715205	0.0557652	-0.237233	1.28604e-10
124	XS_VLDL_PL_pct	-0.0943076	0.0105772	0.0328122	0.37471	0.0717719	0.0519354	-0.062455	0.0908702	0.132343	0.000324137	0.206953	1.52539e-08	0.157332	1.85285e-05	0.229654	3.06165e-10	0.177574	1.2904e-06	0.180374	8.70626e-07	0.0684938	0.0636419	0.217829	2.47348e-09	-0.0983382	0.00767268	-0.113977	0.00198328	0.118621	0.00128359	0.161505	1.09758e-05	-0.137669	0.0001831	-0.0922188	0.0124368	-0.0330911	0.37066	-0.459482	<1E-15	0.182415	6.51016e-07	0.15854	1.5944e-05	-0.312714	<1E-15	-0.0218528	0.554448
125	XS_VLDL_C_pct	0.00738405	0.841705	0.0215121	0.560641	0.161118	1.15278e-05	0.0961849	0.00912088	0.226286	5.61826e-10	0.079323	0.031652	0.112764	0.00221626	0.262098	5.38236e-13	0.181261	7.67557e-07	0.209079	1.07708e-08	0.201884	3.44621e-08	0.344504	<1E-15	-0.062235	0.092016	0.175045	1.83146e-06	0.250106	6.24434e-12	0.311357	<1E-15	0.0870335	0.0183536	0.080558	0.0290843	0.133866	0.000275886	-0.124798	0.000702537	0.240057	4.42077e-11	0.200915	4.01769e-08	-0.034846	0.345814	0.0998424	0.00678677
126	XS_VLDL_CE_pct	0.00763554	0.836388	-0.00862138	0.815621	0.173305	2.32354e-06	0.11547	0.00172719	0.192927	1.38272e-07	0.0700417	0.057868	0.110941	0.00261398	0.222275	1.14303e-09	0.165904	6.2299e-06	0.195595	9.20265e-08	0.19569	9.06913e-08	0.306224	<1E-15	-0.0631986	0.0870819	0.191939	1.60555e-07	0.225064	6.98464e-10	0.266966	1.91847e-13	0.0992216	0.00714064	0.0747169	0.0430069	0.115392	0.0017398	-0.0376611	0.308225	0.212318	6.29352e-09	0.170729	3.29089e-06	0.0485458	0.188928	0.0846438	0.0218242
127	XS_VLDL_FC_pct	-0.0243878	0.509448	0.0857608	0.0201367	0.0392974	0.287665	-0.0386664	0.295481	0.214869	4.09694e-09	0.072805	0.0486417	0.052588	0.154651	0.232473	1.82889e-10	0.121588	0.000964292	0.128696	0.000473565	0.109874	0.00287577	0.270315	9.32587e-14	-0.0552768	0.134608	0.00743072	0.840717	0.18658	3.56066e-07	0.271315	7.50511e-14	-0.0293545	0.427138	0.0230945	0.532166	0.0902715	0.014425	-0.344336	<1E-15	0.198225	6.12666e-08	0.180489	8.56483e-07	-0.27429	3.90799e-14	0.058814	0.111367
128	XS_VLDL_TG_pct	0.022557	0.541755	-0.0479327	0.194581	-0.182877	6.09201e-07	-0.0583624	0.114145	-0.284359	3.9968e-15	-0.180626	8.40014e-07	-0.182707	6.243e-07	-0.359983	<1E-15	-0.259387	9.47242e-13	-0.275804	2.79776e-14	-0.221182	1.38396e-09	-0.411792	<1E-15	0.0868715	0.0185726	-0.0993736	0.00705248	-0.294159	4.44089e-16	-0.3602	<1E-15	-0.0230957	0.532144	-0.0515053	0.163332	-0.12125	0.000996553	0.337541	<1E-15	-0.304886	<1E-15	-0.259763	8.76188e-13	0.182746	6.20794e-07	-0.0967686	0.00870602
129	IDL_PL_pct	-0.100644	0.00638909	-0.0369007	0.318432	-0.341124	<1E-15	-0.499879	<1E-15	-0.076388	0.0386758	0.133753	0.000281908	-0.191794	1.67298e-07	-0.216149	3.3789e-09	-0.274786	3.64153e-14	-0.198256	6.22448e-08	-0.265901	2.50022e-13	-0.470812	<1E-15	-0.100707	0.00635609	-0.490587	<1E-15	-0.254577	2.62923e-12	-0.230315	2.7918e-10	-0.255054	2.38676e-12	-0.161986	1.04692e-05	-0.157175	1.91404e-05	-0.522556	<1E-15	-0.157395	1.86274e-05	-0.107803	0.00347563	-0.350987	<1E-15	-0.132025	0.000338329
130	IDL_C_pct	-0.122469	0.000891867	-0.0285824	0.439714	0.250003	6.58673e-12	0.255167	2.33236e-12	0.252268	4.18998e-12	0.0437807	0.236468	0.132054	0.000337277	0.416333	<1E-15	0.283461	5.32907e-15	0.289483	1.33227e-15	0.330134	<1E-15	0.488585	<1E-15	-0.117731	0.00140741	0.354212	<1E-15	0.344445	<1E-15	0.442675	<1E-15	0.0922044	0.0125107	0.0331226	0.370533	0.115376	0.00175517	-0.103445	0.00505656	0.376184	<1E-15	0.248845	8.28626e-12	0.0206325	0.577042	0.0452336	0.221258
131	IDL_CE_pct	-0.131679	0.000350796	-0.0736971	0.0460886	0.271517	7.4607e-14	0.336926	<1E-15	0.184051	5.23713e-07	-0.0574266	0.120329	0.0948991	0.0101489	0.347249	<1E-15	0.241658	3.35709e-11	0.241275	3.61284e-11	0.331152	<1E-15	0.441365	<1E-15	-0.117659	0.00141703	0.45642	<1E-15	0.302932	<1E-15	0.392921	<1E-15	0.120649	0.0010648	0.0157598	0.670124	0.0862062	0.0195797	0.0992967	0.00713619	0.337923	<1E-15	0.194305	1.14392e-07	0.156426	2.09927e-05	0.00664857	0.85739
132	IDL_FC_pct	-0.047518	0.198781	0.0738347	0.0456824	0.0652596	0.0774456	-0.104404	0.00466128	0.246615	1.28522e-11	0.231457	2.26672e-10	0.156984	1.95986e-05	0.326839	<1E-15	0.21862	2.21367e-09	0.240069	4.54694e-11	0.134659	0.00025598	0.30494	<1E-15	-0.0861296	0.0196888	-0.0795017	0.0313847	0.238566	6.04594e-11	0.302395	<1E-15	-0.0609967	0.0989138	0.0174815	0.636555	0.0892138	0.0156891	-0.523209	<1E-15	0.253944	2.98872e-12	0.236996	8.12408e-11	-0.330297	<1E-15	0.0674368	0.0680395
133	IDL_TG_pct	0.152805	3.26153e-05	0.0346142	0.349363	-0.162355	9.98748e-06	-0.126762	0.000581733	-0.250109	6.44884e-12	-0.0859371	0.0199656	-0.0863563	0.0193672	-0.384115	<1E-15	-0.221007	1.46408e-09	-0.24183	3.24814e-11	-0.275215	3.33067e-14	-0.381314	<1E-15	0.157719	1.7894e-05	-0.234427	1.31194e-10	-0.295075	4.44089e-16	-0.406951	<1E-15	-0.0240265	0.51603	0.0108942	0.76841	-0.0792361	0.0319571	0.271994	6.72795e-14	-0.357845	<1E-15	-0.22671	5.3503e-10	0.0779949	0.0347513	-0.0112846	0.76036
134	L_LDL_PL_pct	-0.0420468	0.255566	-0.0549572	0.137149	-0.311539	<1E-15	-0.342418	<1E-15	-0.115734	0.00169772	-0.145121	8.04049e-05	-0.31382	<1E-15	-0.312886	<1E-15	-0.366533	<1E-15	-0.328492	<1E-15	-0.28002	1.13243e-14	-0.528695	<1E-15	-0.0124179	0.737141	-0.235279	1.11988e-10	-0.286255	2.66454e-15	-0.242578	2.81366e-11	-0.0983844	0.00768555	-0.123279	0.000823678	-0.115173	0.00178848	-0.0973554	0.00835032	-0.185612	4.17705e-07	-0.157772	1.77776e-05	0.00917204	0.804208	-0.117825	0.001395
135	L_LDL_C_pct	-0.126899	0.000573771	-0.0401697	0.277419	0.239162	5.40101e-11	0.252227	4.2244e-12	0.17173	2.92137e-06	0.124496	0.000730145	0.193873	1.22164e-07	0.369057	<1E-15	0.315779	<1E-15	0.316503	<1E-15	0.295249	4.44089e-16	0.48681	<1E-15	-0.14599	7.27674e-05	0.241678	3.34412e-11	0.300747	<1E-15	0.336455	<1E-15	0.0162628	0.660244	0.0180347	0.62592	0.0609849	0.0989793	-0.132442	0.000323824	0.279883	1.15463e-14	0.189161	2.47954e-07	-0.108003	0.00341528	0.0131102	0.723074
136	L_LDL_CE_pct	-0.125288	0.000674728	-0.059813	0.10565	0.276294	2.62013e-14	0.346415	<1E-15	0.12431	0.00074375	0.0811958	0.0279369	0.208552	1.20165e-08	0.343883	<1E-15	0.327952	<1E-15	0.313383	<1E-15	0.311008	<1E-15	0.509817	<1E-15	-0.131437	0.000359798	0.317063	<1E-15	0.297144	2.22045e-16	0.312698	<1E-15	0.0351207	0.342352	0.0171334	0.643284	0.0444254	0.22963	0.0139811	0.705508	0.258398	1.20393e-12	0.1658	6.40803e-06	-0.0391907	0.289306	-0.000269339	0.994192
137	L_LDL_FC_pct	-0.0145689	0.693739	0.0536423	0.146814	-0.291685	8.88178e-16	-0.531406	<1E-15	0.0943911	0.0105613	0.159442	1.4435e-05	-0.137143	0.000195872	-0.0675321	0.0676505	-0.176774	1.46617e-06	-0.113852	0.0020205	-0.222835	1.06336e-09	-0.291417	8.88178e-16	-0.0635264	0.0856667	-0.449213	<1E-15	-0.137898	0.000180403	-0.0619487	0.0937491	-0.17097	3.23595e-06	-0.0755158	0.0409592	-0.0265206	0.473424	-0.612782	<1E-15	-0.0491664	0.18363	0.0191647	0.604439	-0.338137	<1E-15	-0.022917	0.535602
138	L_LDL_TG_pct	0.217436	2.71223e-09	0.104071	0.00479541	-0.112208	0.00234738	-0.112999	0.00218455	-0.165253	6.87991e-06	-0.0844515	0.0222179	-0.0580838	0.116136	-0.319174	<1E-15	-0.194245	1.15446e-07	-0.222276	1.17293e-09	-0.233905	1.44507e-10	-0.316779	<1E-15	0.235476	1.07942e-10	-0.181566	7.47859e-07	-0.233753	1.48631e-10	-0.321502	<1E-15	0.0508241	0.169271	0.0669965	0.0698621	-0.00199904	0.956912	0.276875	2.30926e-14	-0.280052	1.11022e-14	-0.163087	9.096e-06	0.143549	9.61835e-05	0.065349	0.0770395
139	M_LDL_PL_pct	0.0396041	0.287232	-0.00504527	0.8922	-0.234459	1.6919e-10	-0.210049	1.15771e-08	-0.104777	0.00477028	-0.206128	2.18131e-08	-0.277482	2.88658e-14	-0.290559	1.33227e-15	-0.322783	<1E-15	-0.307318	<1E-15	-0.225518	8.41894e-10	-0.448528	<1E-15	0.0820352	0.0272966	-0.114527	0.00202566	-0.246461	1.7665e-11	-0.204603	2.78177e-08	0.0242333	0.515033	-0.0411039	0.269355	-0.03863	0.299261	0.11415	0.00209647	-0.170327	4.04963e-06	-0.135127	0.000266002	0.185294	5.14923e-07	-0.0431822	0.245867
140	M_LDL_C_pct	-0.113952	0.00213462	-0.0368952	0.321504	0.213087	7.02584e-09	0.193436	1.55897e-07	0.134099	0.000296469	0.183277	6.86707e-07	0.211601	8.97791e-09	0.316352	<1E-15	0.300372	<1E-15	0.299875	<1E-15	0.24283	3.54454e-11	0.438415	<1E-15	-0.159048	1.71146e-05	0.142903	0.000114172	0.257462	1.99885e-12	0.256279	2.53975e-12	-0.047644	0.200376	0.00141621	0.969655	0.0239538	0.519894	-0.192737	1.73074e-07	0.217555	3.32548e-09	0.151493	4.26077e-05	-0.209515	1.26286e-08	-0.000870209	0.981352
141	M_LDL_CE_pct	-0.100069	0.00704553	-0.0446511	0.230154	0.242306	3.91562e-11	0.25324	4.67071e-12	0.103248	0.00542323	0.16189	1.20112e-05	0.236486	1.16515e-10	0.29972	2.22045e-16	0.312852	<1E-15	0.30099	<1E-15	0.249636	9.5195e-12	0.460434	<1E-15	-0.135412	0.000258076	0.185624	4.91058e-07	0.258192	1.72351e-12	0.234906	1.55862e-10	-0.0289203	0.437168	0.00761497	0.837926	0.0147125	0.692688	-0.0960628	0.00970117	0.203924	3.09769e-08	0.137772	0.000200479	-0.158034	1.93925e-05	0.00094371	0.979777
142	M_LDL_FC_pct	0.0546923	0.141514	0.0543056	0.144355	-0.287635	2.88658e-15	-0.359242	<1E-15	-0.0305067	0.41243	-0.102342	0.00584719	-0.270634	1.2812e-13	-0.232543	2.39986e-10	-0.305228	<1E-15	-0.271391	1.08802e-13	-0.242237	3.96745e-11	-0.454018	<1E-15	0.0690332	0.0633825	-0.260552	1.06359e-12	-0.230577	3.42387e-10	-0.161645	1.2386e-05	-0.0225389	0.544854	-0.0256086	0.491466	0.00269542	0.942283	-0.128666	0.000519512	-0.149369	5.46433e-05	-0.0920208	0.013249	0.0214966	0.563615	-0.0147712	0.691523
143	M_LDL_TG_pct	0.209982	1.17042e-08	0.102769	0.00564407	-0.110641	0.00287263	-0.102187	0.00592285	-0.144808	9.21853e-05	-0.104409	0.00492052	-0.0523856	0.159106	-0.286369	3.9968e-15	-0.179239	1.21082e-06	-0.206855	1.94143e-08	-0.215292	4.86649e-09	-0.291967	1.11022e-15	0.249322	1.01248e-11	-0.147614	6.69454e-05	-0.201018	4.88992e-08	-0.276193	3.84137e-14	0.0710742	0.0559373	0.0682972	0.0662602	0.00974626	0.793477	0.283341	7.77156e-15	-0.245009	2.33702e-11	-0.143148	0.0001111	0.180063	1.07965e-06	0.0665438	0.0735503
144	S_LDL_PL_pct	0.049601	0.182182	0.0187318	0.614582	-0.237195	9.91922e-11	-0.243581	2.97722e-11	-0.0754448	0.042275	-0.187518	3.66592e-07	-0.274471	5.37348e-14	-0.271439	1.03695e-13	-0.318121	<1E-15	-0.300862	<1E-15	-0.223327	1.20297e-09	-0.443846	<1E-15	0.0969229	0.00901785	-0.134694	0.000275743	-0.231617	2.75902e-10	-0.181851	8.25682e-07	0.0247199	0.506334	-0.032599	0.380773	-0.0200238	0.590384	0.0631535	0.0892774	-0.148711	5.82912e-05	-0.113968	0.00211632	0.159502	1.59624e-05	-0.0269836	0.468186
145	S_LDL_C_pct	-0.0737282	0.0472037	-0.00379953	0.918654	0.214194	5.70658e-09	0.168694	4.94394e-06	0.131184	0.000397921	0.216607	3.80727e-09	0.236015	1.23437e-10	0.310438	<1E-15	0.304873	<1E-15	0.303995	<1E-15	0.219559	2.30569e-09	0.429125	<1E-15	-0.130381	0.000432233	0.0859086	0.0206981	0.241259	4.63038e-11	0.229136	4.31244e-10	-0.0472671	0.203651	0.021424	0.564663	0.0359169	0.334177	-0.224443	9.90053e-10	0.194107	1.38185e-07	0.146304	7.69071e-05	-0.23422	1.71735e-10	0.0226813	0.542036
146	S_LDL_CE_pct	-0.0890805	0.016431	-0.0360474	0.332423	0.230877	3.15417e-10	0.215871	4.30945e-09	0.0944077	0.010981	0.19641	9.74597e-08	0.252279	5.46674e-12	0.291438	1.11022e-15	0.313612	<1E-15	0.303424	<1E-15	0.224287	1.0174e-09	0.440949	<1E-15	-0.134046	0.000295278	0.123831	0.000833701	0.23955	6.38938e-11	0.207658	1.66768e-08	-0.0500664	0.17811	0.00349211	0.925216	0.00596999	0.87251	-0.144541	9.39524e-05	0.178666	1.28904e-06	0.133529	0.00031176	-0.195224	1.16727e-07	0.00269904	0.942165
147	S_LDL_FC_pct	0.114237	0.00206512	0.121312	0.00106459	-0.250826	7.28839e-12	-0.316103	<1E-15	0.01937	0.602573	-0.118113	0.00144274	-0.263448	5.63549e-13	-0.19487	1.23141e-07	-0.289711	1.77636e-15	-0.257204	2.03437e-12	-0.196736	9.27285e-08	-0.399903	<1E-15	0.132394	0.000351006	-0.204456	2.7851e-08	-0.191628	2.00258e-07	-0.107038	0.00390911	0.0445273	0.231127	0.0422164	0.256268	0.0778857	0.0360198	-0.100742	0.00663161	-0.100609	0.00670411	-0.0656167	0.0774565	0.0494786	0.183265	0.0441541	0.235064
148	S_LDL_TG_pct	0.108786	0.00335908	-0.0243174	0.513283	-0.0469905	0.206312	0.113013	0.00230761	-0.19992	5.67886e-08	-0.226364	7.06055e-10	-0.0550528	0.138631	-0.274529	5.30687e-14	-0.136561	0.000226044	-0.172997	2.79381e-06	-0.117061	0.00159195	-0.192083	1.8715e-07	0.175235	2.06471e-06	0.0974451	0.00865188	-0.137269	0.000209501	-0.233999	1.78819e-10	0.109619	0.00312274	0.0404153	0.277133	-0.035561	0.338992	0.561165	<1E-15	-0.21367	6.22654e-09	-0.1706	3.8464e-06	0.339322	<1E-15	-0.00634527	0.864571
149	XL_HDL_PL_pct	0.12345	0.000932332	0.139058	0.000189527	-0.098931	0.00807089	-0.262294	9.92983e-13	0.0694672	0.0631956	0.102051	0.00627495	0.0510849	0.172114	-0.0337777	0.366788	-0.00606242	0.871355	-0.0378545	0.311772	-0.144104	0.000109093	-0.100128	0.00733338	0.109261	0.0034193	-0.286315	5.77316e-15	-0.0443055	0.236396	-0.0613609	0.100884	0.0256328	0.493469	0.0615694	0.0997292	0.0594848	0.11176	-0.331744	<1E-15	-0.0506478	0.175818	0.0299754	0.423209	-0.0957799	0.010338	0.106793	0.004226
150	XL_HDL_C_pct	-0.12778	0.000609743	-0.118137	0.00154173	0.0786734	0.0353139	0.198253	8.85335e-08	-0.0259403	0.488298	-0.0836204	0.025251	-0.0791918	0.0341197	0.0558345	0.135546	-0.0163941	0.66143	0.0354782	0.343144	0.131864	0.000403585	0.0891125	0.017076	-0.1214	0.0011347	0.226067	9.47922e-10	0.025693	0.492454	0.0804567	0.0313497	-0.0464024	0.214923	-0.078779	0.0350677	-0.0532136	0.154904	0.203381	4.01742e-08	0.0680969	0.0685946	-0.00227318	0.951582	0.031465	0.400526	-0.105104	0.00487367
151	XL_HDL_CE_pct	-0.154491	3.30143e-05	-0.164459	9.73035e-06	0.0337265	0.367514	0.180703	1.13326e-06	-0.0688654	0.0655218	-0.0609955	0.102933	-0.0659356	0.0778748	-0.00335497	0.928592	-0.0331762	0.375387	0.0186098	0.619092	0.0951956	0.0108156	0.0370307	0.322427	-0.146316	8.51313e-05	0.187335	4.44722e-07	0.000179979	0.996164	0.0266748	0.476062	-0.100085	0.00735914	-0.104775	0.00500968	-0.099434	0.0077534	0.200514	6.26505e-08	0.020753	0.579304	-0.0555594	0.137486	-0.0251497	0.501654	-0.150142	5.49752e-05
152	XL_HDL_FC_pct	0.0679968	0.0690037	0.148806	6.41242e-05	0.181299	1.04336e-06	0.114159	0.00221808	0.159667	1.76674e-05	-0.0929578	0.012831	-0.0582604	0.119342	0.271311	1.51212e-13	0.0751814	0.0443204	0.0664126	0.0757435	0.175517	2.30068e-06	0.220372	2.5243e-09	0.0736804	0.0487482	0.193529	1.80023e-07	0.0960391	0.0101321	0.224834	1.17452e-09	0.204075	3.60461e-08	0.07424	0.0470559	0.166034	7.96785e-06	0.0439039	0.240675	0.18956	3.22489e-07	0.195182	1.40722e-07	0.246764	2.15328e-11	0.133507	0.0003407
153	XL_HDL_TG_pct	-0.00453236	0.903639	-0.111263	0.00287061	0.121355	0.00113951	0.334854	<1E-15	-0.163516	1.09564e-05	-0.168639	5.70287e-06	0.0683732	0.0674765	-0.0977165	0.00888593	0.0430167	0.250321	0.00240367	0.948807	0.0780476	0.0368026	0.0989646	0.00804931	0.0117751	0.753109	0.346863	<1E-15	0.0779664	0.0369996	-0.0362461	0.332793	0.0996761	0.0076046	0.0523296	0.161886	-0.0221013	0.554902	0.620644	<1E-15	-0.0530847	0.155908	-0.0981501	0.0085869	0.311109	<1E-15	-0.0266275	0.476845
154	L_HDL_PL_pct	-0.215728	5.50306e-09	-0.198832	8.10622e-08	0.108435	0.00367225	0.19793	9.29876e-08	-0.114044	0.00224125	0.055019	0.141359	0.018804	0.615438	-0.0281184	0.452514	0.0502785	0.178993	0.0489243	0.191002	0.0745063	0.0462679	0.0673005	0.0719028	-0.216626	4.73962e-09	0.0829142	0.0265155	0.00327309	0.93033	-0.0421384	0.260133	-0.195931	1.25766e-07	-0.172295	3.53561e-06	-0.221731	2.00302e-09	-0.0151127	0.68643	0.0349775	0.350002	-0.0181023	0.628685	-0.201482	5.39633e-08	-0.202587	4.54653e-08
155	L_HDL_C_pct	0.0629631	0.0922777	0.100607	0.00705593	-0.164664	9.48159e-06	-0.325792	<1E-15	0.141643	0.000143148	-0.01533	0.682166	-0.0870612	0.0198086	0.058738	0.116338	-0.103522	0.00555983	-0.0568986	0.128241	-0.0933394	0.0124655	-0.100124	0.00733577	0.0595714	0.111238	-0.201789	5.14575e-08	-0.0485486	0.194436	0.0668876	0.0736687	0.0249695	0.504724	0.00400566	0.914791	0.0966647	0.00965025	-0.250735	9.99978e-12	0.0055156	0.882871	0.0664284	0.0756736	0.00192993	0.958886	0.0723414	0.0530054
156	L_HDL_CE_pct	0.0707131	0.0585956	0.0714158	0.056126	-0.185818	5.52455e-07	-0.308634	<1E-15	0.0374711	0.316701	-0.0448348	0.230838	-0.111523	0.00280567	-0.0415971	0.266311	-0.147635	7.33104e-05	-0.114513	0.00214852	-0.14652	8.3195e-05	-0.199324	7.52018e-08	0.0595171	0.111565	-0.228719	5.95318e-10	-0.135997	0.000262595	-0.0592727	0.113046	0.00884753	0.813173	-0.0189425	0.612839	0.045504	0.223945	-0.12657	0.000687456	-0.105228	0.00482299	-0.0209634	0.575463	0.0514805	0.168812	0.0303065	0.418103
157	L_HDL_FC_pct	0.044765	0.231565	0.141809	0.000140562	-0.0773035	0.0386418	-0.269604	2.1716e-13	0.288536	3.55271e-15	0.037627	0.314692	-0.0133889	0.720603	0.235162	1.87702e-10	0.0156612	0.675685	0.0637579	0.088232	0.0161706	0.665764	0.102238	0.00617935	0.0466121	0.212855	-0.102953	0.00582702	0.114524	0.00214629	0.265628	4.99156e-13	0.0502364	0.179358	0.0408588	0.274898	0.161622	1.38798e-05	-0.394958	<1E-15	0.18814	3.96063e-07	0.209259	1.58321e-08	-0.0801273	0.032052	0.131921	0.000401215
158	L_HDL_TG_pct	0.22447	1.25079e-09	0.118134	0.00154223	0.105072	0.00488663	0.262136	1.02585e-12	-0.0415109	0.267304	-0.115595	0.00194769	0.0958605	0.0102736	-0.0611436	0.102099	0.0991012	0.0079622	0.0120976	0.746576	0.0706363	0.0588709	0.0825081	0.027267	0.221466	2.09555e-09	0.264737	6.00409e-13	0.114767	0.00209964	0.00374552	0.920306	0.295642	6.66134e-16	0.28535	7.10543e-15	0.206929	2.29748e-08	0.523416	<1E-15	-0.0321268	0.390687	-0.0611712	0.101944	0.372313	<1E-15	0.210802	1.23419e-08
159	M_HDL_PL_pct	0.165197	6.83012e-06	0.0435288	0.238857	0.111185	0.00255704	0.0922136	0.0124417	-0.102679	0.00536186	0.131276	0.000362534	0.144366	8.66842e-05	-0.0770757	0.0368234	0.0975467	0.00817919	0.0688074	0.0624353	-0.022985	0.534113	-0.00768114	0.835425	0.0609408	0.0989932	-0.0716417	0.0523635	-0.0845116	0.0220317	-0.197942	6.40297e-08	0.0272085	0.461715	0.0880257	0.0170607	0.00300475	0.935229	0.271346	7.4607e-14	-0.190354	2.03686e-07	-0.137434	0.000187855	0.0791317	0.0320666	0.0588454	0.111176
160	M_HDL_C_pct	-0.122326	0.000897107	0.0322023	0.383657	-0.0907981	0.0138614	-0.201564	3.62529e-08	0.201207	3.83617e-08	-0.0233816	0.527078	-0.110788	0.00265005	0.178401	1.14951e-06	-0.0550253	0.136393	-0.0105501	0.775377	0.0214212	0.562298	0.0553651	0.133986	-0.0459558	0.213651	-0.0252174	0.495148	0.102487	0.00544916	0.264418	3.29958e-13	-0.051426	0.163982	-0.0840444	0.0227792	0.0391283	0.289746	-0.442797	<1E-15	0.241423	3.40532e-11	0.21622	3.25691e-09	-0.170249	3.50938e-06	-0.00543503	0.883133
161	M_HDL_CE_pct	-0.167153	5.29036e-06	-0.0296042	0.423213	-0.164559	7.41899e-06	-0.269455	1.12355e-13	0.131994	0.000336252	-0.0227873	0.537637	-0.130458	0.000394759	0.104291	0.00467827	-0.10456	0.00457225	-0.0407747	0.269913	-0.0401614	0.27719	-0.0401301	0.277564	-0.107139	0.00365998	-0.115347	0.00174717	0.0237898	0.519889	0.173756	2.18504e-06	-0.144325	8.70894e-05	-0.154634	2.58106e-05	-0.040554	0.272517	-0.469468	<1E-15	0.154911	2.49531e-05	0.141388	0.000121367	-0.241773	3.1847e-11	-0.0814389	0.0273641
162	M_HDL_FC_pct	0.0720701	0.0509661	0.208652	1.15538e-08	0.191228	1.78691e-07	0.101518	0.00590867	0.366536	<1E-15	-0.0458746	0.214462	-0.0231111	0.531872	0.35828	<1E-15	0.124632	0.000714331	0.0926519	0.0120291	0.219943	1.71711e-09	0.351711	<1E-15	0.191086	1.8253e-07	0.293469	4.44089e-16	0.311713	<1E-15	0.478364	<1E-15	0.294178	4.44089e-16	0.195724	9.02216e-08	0.316753	<1E-15	-0.170206	3.52962e-06	0.443236	<1E-15	0.372694	<1E-15	0.151415	3.8055e-05	0.249225	7.43894e-12
163	M_HDL_TG_pct	0.054269	0.141872	-0.099266	0.00711475	0.0664364	0.0720435	0.264083	3.54383e-13	-0.252155	4.14446e-12	-0.0826908	0.0250706	0.0635149	0.0855092	-0.231933	2.01974e-10	0.0146921	0.691081	-0.0393345	0.28721	-0.024204	0.512646	-0.0867828	0.0186935	0.0229764	0.534266	0.125863	0.000631464	-0.0908002	0.0138592	-0.271718	6.88338e-14	0.06767	0.0669037	0.0579162	0.116943	-0.0754818	0.0409122	0.527162	<1E-15	-0.237576	7.0727e-11	-0.242258	2.90106e-11	0.238072	6.44109e-11	-0.0477346	0.196433
164	S_HDL_PL_pct	-0.120079	0.00111618	-0.188605	2.64229e-07	-0.0977659	0.00803599	0.00446026	0.903981	-0.0677889	0.0664245	-0.331561	<1E-15	-0.28465	3.77476e-15	-0.182861	6.10613e-07	-0.278684	1.46549e-14	-0.245832	1.45099e-11	-0.0884199	0.0165696	-0.215978	3.39426e-09	-0.0594558	0.107511	0.22686	5.06873e-10	-0.0802827	0.0296408	-0.0290802	0.431471	0.00717831	0.846059	-0.151663	3.69428e-05	-0.126655	0.00058297	0.325599	<1E-15	-0.00498137	0.892827	-0.0566776	0.124993	0.27953	1.19904e-14	-0.145842	7.31774e-05
165	S_HDL_C_pct	0.07488	0.0425528	0.177358	1.32972e-06	0.0822964	0.0257745	-0.0542723	0.141847	0.126934	0.000566748	0.322875	<1E-15	0.242453	2.79452e-11	0.233465	1.52304e-10	0.26597	2.37366e-13	0.239709	4.72342e-11	0.0949283	0.0100743	0.234491	1.25943e-10	0.0212264	0.565859	-0.220905	1.45263e-09	0.112654	0.0022385	0.104217	0.00470773	-0.0307424	0.405599	0.11564	0.00170014	0.124142	0.000750014	-0.442905	<1E-15	0.0780833	0.0344222	0.114666	0.00186101	-0.327417	<1E-15	0.125183	0.000676046
166	S_HDL_CE_pct	0.0517416	0.161407	0.145956	7.22245e-05	0.0819202	0.0264619	-0.048405	0.190215	0.105145	0.00434882	0.329276	<1E-15	0.246597	1.24909e-11	0.215165	3.89673e-09	0.264342	3.35509e-13	0.238791	5.62279e-11	0.0899951	0.0147288	0.222271	1.144e-09	-0.00801455	0.82839	-0.224401	7.85751e-10	0.10061	0.00637102	0.0826423	0.0251562	-0.0539956	0.143893	0.0931042	0.0116158	0.0942627	0.0106143	-0.439494	<1E-15	0.0646443	0.0800809	0.0970947	0.00848166	-0.340516	<1E-15	0.099586	0.00693094
167	S_HDL_FC_pct	0.117319	0.00145234	0.109973	0.00285053	-0.0528693	0.152454	-0.0151385	0.682201	0.0828937	0.0247148	-0.284523	3.9968e-15	-0.186513	3.59557e-07	-0.0316787	0.391442	-0.173516	2.25754e-06	-0.169455	3.90157e-06	-0.0283791	0.442663	-0.0801252	0.0299631	0.202449	3.15012e-08	0.175696	1.67441e-06	0.0169878	0.645883	0.104245	0.0046966	0.202215	3.26977e-08	0.0907971	0.0138625	0.151169	3.91888e-05	0.26829	1.44329e-13	0.0504111	0.172473	0.0650628	0.0781417	0.325139	<1E-15	0.111865	0.00240491
168	S_HDL_TG_pct	0.11733	0.00145087	-0.0394629	0.285638	0.0397784	0.281801	0.213752	4.94756e-09	-0.246929	1.17042e-11	-0.0871001	0.0182641	0.0677007	0.0667795	-0.244156	2.01079e-11	-0.0228294	0.536884	-0.0569438	0.123227	-0.0578685	0.117246	-0.1151	0.00178771	0.102698	0.00535347	0.0615356	0.0957358	-0.136117	0.000216731	-0.296869	2.22045e-16	0.0688092	0.0624285	0.0747696	0.0428599	-0.0452808	0.220461	0.565507	<1E-15	-0.275521	2.9754e-14	-0.257396	1.42863e-12	0.2541	2.79909e-12	-0.00984569	0.790012
169	VLDL_size	-0.181006	7.95863e-07	-0.247965	9.54437e-12	0.00350717	0.924429	0.267012	1.9007e-13	-0.216334	3.19414e-09	-0.30269	<1E-15	-0.149559	4.74343e-05	-0.192372	1.50395e-07	-0.122558	0.000876966	-0.145881	7.28554e-05	0.0156543	0.671992	-0.119921	0.0011333	-0.105917	0.00406919	0.332358	<1E-15	-0.0791726	0.0319776	-0.110157	0.00280423	0.00180833	0.960992	-0.134585	0.000255501	-0.174622	1.94095e-06	0.574744	<1E-15	-0.0892783	0.0155429	-0.170434	3.42347e-06	0.344548	<1E-15	-0.193447	1.27793e-07
170	LDL_size	0.217749	2.50752e-09	0.0681634	0.0649341	0.00446567	0.903865	-0.0375205	0.310036	-0.0502059	0.174229	-0.0551825	0.135275	0.0529851	0.151557	-0.158065	1.69154e-05	-0.071503	0.0528227	-0.0643526	0.0814555	-0.115968	0.00164883	-0.0875289	0.0176977	0.122877	0.000849893	-0.0500265	0.175775	-0.046251	0.210721	-0.141858	0.000115141	0.0788476	0.0326909	0.0850022	0.0212698	0.0228912	0.535784	0.17197	2.78463e-06	-0.103256	0.00510732	-0.0739694	0.0451407	0.132313	0.000325166	0.0801219	0.0299699
171	HDL_size	0.113148	0.00213995	0.160749	1.20796e-05	0.122037	0.000922922	0.00792535	0.830271	0.360837	<1E-15	-0.0959555	0.00928872	0.0196225	0.59558	0.307913	<1E-15	0.0904746	0.0142052	0.0916544	0.0129865	0.148304	5.49761e-05	0.280654	9.32587e-15	0.16962	3.81708e-06	0.267031	1.89182e-13	0.267186	1.82965e-13	0.404184	<1E-15	0.293301	4.44089e-16	0.167728	4.90488e-06	0.284819	3.55271e-15	-0.0326891	0.376506	0.331646	<1E-15	0.28707	2.22045e-15	0.270818	8.34888e-14	0.237046	7.81455e-11
172	Total_C	0.0545853	0.139561	0.121439	0.000978398	0.388538	<1E-15	0.422952	<1E-15	0.292891	4.44089e-16	0.0157589	0.669929	0.229527	3.13354e-10	0.459564	<1E-15	0.374638	<1E-15	0.32911	<1E-15	0.384118	<1E-15	0.645348	<1E-15	0.105278	0.00429956	0.480139	<1E-15	0.424846	<1E-15	0.488135	<1E-15	0.293033	4.44089e-16	0.214295	4.51464e-09	0.281031	8.65974e-15	0.140784	0.000129848	0.400027	<1E-15	0.30924	<1E-15	0.20653	1.63409e-08	0.215365	3.76688e-09
173	VLDL_C	0.0358849	0.331615	-0.0443413	0.230195	0.288816	1.33227e-15	0.52662	<1E-15	-0.0312734	0.397534	-0.148074	5.6475e-05	0.153765	2.86822e-05	0.0962084	0.00910387	0.206639	1.60535e-08	0.145835	7.32426e-05	0.255228	2.22622e-12	0.352329	<1E-15	0.0399607	0.2796	0.471663	<1E-15	0.202932	2.91663e-08	0.12199	0.000927144	0.219796	1.76131e-09	0.136525	0.000207367	0.087475	0.0177681	0.58057	<1E-15	0.0786626	0.033103	0.02048	0.579602	0.342086	<1E-15	0.0608449	0.0995264
174	Remnant_C	0.0466168	0.20713	0.0168565	0.648435	0.362139	<1E-15	0.515025	<1E-15	0.0861612	0.0195601	-0.0499102	0.176783	0.228325	3.89472e-10	0.259362	9.52127e-13	0.310549	<1E-15	0.255736	2.00728e-12	0.324652	<1E-15	0.515022	<1E-15	0.0426722	0.248234	0.473377	<1E-15	0.303392	<1E-15	0.264692	3.11529e-13	0.232771	1.73118e-10	0.165635	6.45234e-06	0.154466	2.63423e-05	0.397716	<1E-15	0.205492	1.93352e-08	0.133	0.000302432	0.258483	1.14198e-12	0.117542	0.00142206
175	LDL_C	-0.00142701	0.969213	0.0547754	0.138185	0.336169	<1E-15	0.3674	<1E-15	0.181923	6.98389e-07	0.107045	0.00369004	0.262004	5.48894e-13	0.387683	<1E-15	0.367446	<1E-15	0.337812	<1E-15	0.322969	<1E-15	0.573525	<1E-15	-0.00441779	0.904891	0.312841	<1E-15	0.331534	<1E-15	0.345172	<1E-15	0.139428	0.000150927	0.125968	0.000624817	0.157369	1.84428e-05	0.0421054	0.254579	0.283869	4.44089e-15	0.212107	6.51928e-09	0.0270374	0.464539	0.118837	0.00125738
176	HDL_C	0.112312	0.00230929	0.237864	6.69962e-11	0.187788	2.98134e-07	0.0741946	0.0444887	0.421316	<1E-15	-0.0673207	0.0683274	-0.00202543	0.956313	0.411922	<1E-15	0.147999	5.69758e-05	0.125855	0.000631964	0.228868	3.53091e-10	0.369102	<1E-15	0.220949	1.44155e-09	0.32411	<1E-15	0.337158	<1E-15	0.525558	<1E-15	0.350116	<1E-15	0.222285	1.14109e-09	0.367697	<1E-15	-0.119271	0.00120626	0.46106	<1E-15	0.39793	<1E-15	0.258529	1.13132e-12	0.29975	<1E-15
177	HDL2_C	0.0820467	0.026229	0.211552	7.15165e-09	0.168982	4.15514e-06	0.0511541	0.166226	0.41112	<1E-15	-0.0698017	0.0587339	-0.0163048	0.659203	0.400135	<1E-15	0.13044	0.00039551	0.113134	0.00214265	0.214957	4.03684e-09	0.346136	<1E-15	0.191597	1.69048e-07	0.308871	<1E-15	0.326017	<1E-15	0.515582	<1E-15	0.320319	<1E-15	0.189518	2.30729e-07	0.337108	<1E-15	-0.145076	7.99149e-05	0.455214	<1E-15	0.393812	<1E-15	0.238859	5.55063e-11	0.269323	1.15463e-13
178	HDL3_C	0.296478	2.22045e-16	0.367682	<1E-15	0.300604	<1E-15	0.250701	5.54556e-12	0.39647	<1E-15	-0.034004	0.357601	0.113383	0.00209444	0.401925	<1E-15	0.242019	3.03788e-11	0.19377	1.21667e-07	0.299567	<1E-15	0.471016	<1E-15	0.382824	<1E-15	0.381257	<1E-15	0.349019	<1E-15	0.474801	<1E-15	0.482723	<1E-15	0.40745	<1E-15	0.502146	<1E-15	0.114645	0.00186468	0.391936	<1E-15	0.32351	<1E-15	0.33158	<1E-15	0.440822	<1E-15
179	Esterified_C	0.0512983	0.166776	0.127126	0.000585801	0.377588	<1E-15	0.403699	<1E-15	0.292885	8.88178e-16	0.0113031	0.760777	0.213481	5.97967e-09	0.454449	<1E-15	0.35398	<1E-15	0.319925	<1E-15	0.377144	<1E-15	0.630397	<1E-15	0.0992316	0.00737477	0.466741	<1E-15	0.411486	<1E-15	0.486891	<1E-15	0.283567	6.21725e-15	0.207444	1.61304e-08	0.28021	1.33227e-14	0.111544	0.00257942	0.405275	<1E-15	0.309258	<1E-15	0.183566	6.13837e-07	0.209412	1.17099e-08
180	Free_C	0.0637276	0.0857498	0.103015	0.00540044	0.415155	<1E-15	0.436666	<1E-15	0.265154	3.52829e-13	0.0403077	0.277419	0.259608	1.11977e-12	0.434837	<1E-15	0.390446	<1E-15	0.324781	<1E-15	0.367263	<1E-15	0.648551	<1E-15	0.0947565	0.0105266	0.477297	<1E-15	0.419664	<1E-15	0.456879	<1E-15	0.283882	5.77316e-15	0.210704	9.47295e-09	0.263879	4.61409e-13	0.181326	8.43991e-07	0.365624	<1E-15	0.296381	4.44089e-16	0.22188	1.43109e-09	0.210769	9.3725e-09
181	Total_TG	0.00259838	0.943974	-0.0948531	0.0101341	0.193521	1.26357e-07	0.465644	<1E-15	-0.135567	0.000229959	-0.246547	1.2615e-11	0.0305954	0.407849	-0.0589342	0.110637	0.0605909	0.10095	0.00195009	0.957937	0.130942	0.000375373	0.134267	0.000264337	0.0619484	0.0935262	0.439952	<1E-15	0.055541	0.132752	-0.0302863	0.412605	0.18431	4.95553e-07	0.0573204	0.120763	-0.00659408	0.85845	0.718166	<1E-15	-0.0329555	0.372626	-0.0920695	0.0125802	0.4436	<1E-15	-0.0158961	0.667226
182	VLDL_TG	-0.0766082	0.037985	-0.164517	7.45948e-06	0.142845	0.000103027	0.428663	<1E-15	-0.170937	3.20019e-06	-0.273346	4.79616e-14	-0.0279442	0.449688	-0.100491	0.00643394	0.011258	0.760751	-0.0362264	0.327032	0.101783	0.00577973	0.0662675	0.0727716	-0.0157254	0.670588	0.423426	<1E-15	0.0143548	0.69782	-0.0577548	0.117969	0.115068	0.00179294	-0.0194539	0.598745	-0.0771013	0.0367608	0.689011	<1E-15	-0.0548847	0.1374	-0.120351	0.00108719	0.406421	<1E-15	-0.0922481	0.0124089
183	LDL_TG	0.266511	2.11386e-13	0.207896	1.30776e-08	0.343831	<1E-15	0.416197	<1E-15	0.0892141	0.0156176	0.0165546	0.654319	0.277875	1.77636e-14	0.190683	1.93908e-07	0.280579	9.54792e-15	0.20782	1.3241e-08	0.220478	1.5648e-09	0.416653	<1E-15	0.298041	<1E-15	0.315595	<1E-15	0.218052	2.38022e-09	0.134045	0.000270678	0.332032	<1E-15	0.29649	2.22045e-16	0.249741	6.71396e-12	0.446837	<1E-15	0.104889	0.0044453	0.112495	0.00227124	0.324406	<1E-15	0.280868	8.88178e-15
184	HDL_TG	0.194278	1.12605e-07	0.0958598	0.0093595	0.213264	5.37085e-09	0.407245	<1E-15	-0.00912518	0.805058	-0.206089	1.75524e-08	0.0714012	0.0531619	-0.00293988	0.936625	0.0914634	0.0131773	0.0190205	0.606917	0.160854	1.19206e-05	0.164933	7.06835e-06	0.263339	4.14779e-13	0.463593	<1E-15	0.163516	8.488e-06	0.0879874	0.017109	0.396748	<1E-15	0.284619	3.77476e-15	0.22917	3.34305e-10	0.673657	<1E-15	0.0700616	0.0577969	0.00218099	0.952962	0.557548	<1E-15	0.209668	9.77516e-09
185	Phosphoglyc	0.0267058	0.471863	0.0794701	0.0320386	0.367292	<1E-15	0.43837	<1E-15	0.291974	8.88178e-16	-0.150488	4.5692e-05	0.131236	0.000384921	0.38464	<1E-15	0.272038	8.10463e-14	0.213928	5.54981e-09	0.37212	<1E-15	0.585899	<1E-15	0.138196	0.000183812	0.640642	<1E-15	0.424592	<1E-15	0.511121	<1E-15	0.335727	<1E-15	0.171773	3.14054e-06	0.249109	9.26104e-12	0.295259	4.44089e-16	0.419091	<1E-15	0.314278	<1E-15	0.356148	<1E-15	0.181471	8.26852e-07
186	TG_by_PG	0.02562	0.490074	-0.0995146	0.00720734	0.0729834	0.0490172	0.308081	<1E-15	-0.235539	1.23453e-10	-0.210831	9.27825e-09	-0.00571899	0.877576	-0.191642	1.8857e-07	-0.0170691	0.645667	-0.0606362	0.102102	0.00674268	0.855883	-0.0509832	0.169401	0.0549386	0.138634	0.24277	3.16673e-11	-0.0743006	0.0450631	-0.192794	1.58689e-07	0.130409	0.000419255	0.0505577	0.172993	-0.0425181	0.251899	0.667766	<1E-15	-0.187522	3.4656e-07	-0.187768	3.3431e-07	0.384851	<1E-15	-0.0403081	0.277415
187	Phosphatidylc	0.0557117	0.133158	0.0946951	0.0105771	0.35956	<1E-15	0.420329	<1E-15	0.269925	1.27898e-13	-0.118762	0.00132627	0.153841	3.06535e-05	0.352714	<1E-15	0.283446	6.43929e-15	0.211733	7.99476e-09	0.339652	<1E-15	0.561496	<1E-15	0.131402	0.000378353	0.604063	<1E-15	0.415586	<1E-15	0.475182	<1E-15	0.350836	<1E-15	0.200477	4.88745e-08	0.262591	6.03739e-13	0.275937	3.4639e-14	0.385649	<1E-15	0.296303	4.44089e-16	0.35075	<1E-15	0.201615	4.08921e-08
188	Sphingomyelins	0.0174153	0.638984	0.0702335	0.0582135	0.393266	<1E-15	0.339794	<1E-15	0.322723	<1E-15	0.0973221	0.0085984	0.241487	4.0445e-11	0.516257	<1E-15	0.395997	<1E-15	0.347141	<1E-15	0.358837	<1E-15	0.654283	<1E-15	0.0557529	0.13287	0.419326	<1E-15	0.424059	<1E-15	0.513233	<1E-15	0.220506	1.81538e-09	0.152183	3.7382e-05	0.23591	1.15265e-10	0.0369647	0.319256	0.386957	<1E-15	0.349529	<1E-15	0.169349	4.33461e-06	0.19417	1.28962e-07
189	Cholines	-0.0904521	0.0146328	-0.0443366	0.232165	0.355727	<1E-15	0.418945	<1E-15	0.270333	1.1724e-13	-0.0950396	0.0102964	0.168293	4.98068e-06	0.403298	<1E-15	0.308586	<1E-15	0.256092	2.29683e-12	0.361155	<1E-15	0.621279	<1E-15	-0.017681	0.633877	0.607107	<1E-15	0.443006	<1E-15	0.509549	<1E-15	0.190828	2.12874e-07	0.0484378	0.191742	0.124187	0.000785068	0.224383	9.23992e-10	0.403798	<1E-15	0.310302	<1E-15	0.242604	3.26894e-11	0.0671512	0.0701765
190	ApoA1	0.0645677	0.0804398	0.181284	7.65006e-07	0.272284	6.08402e-14	0.239201	5.20264e-11	0.414723	<1E-15	-0.116508	0.00156762	0.0469215	0.204173	0.455137	<1E-15	0.217014	2.84436e-09	0.183333	5.70596e-07	0.326258	<1E-15	0.500967	<1E-15	0.191826	1.63316e-07	0.499702	<1E-15	0.425406	<1E-15	0.59436	<1E-15	0.3721	<1E-15	0.219407	1.88434e-09	0.353777	<1E-15	0.0374684	0.310709	0.511686	<1E-15	0.413822	<1E-15	0.323891	<1E-15	0.27194	6.52811e-14
191	ApoB	-0.00615525	0.867781	-0.0217346	0.556593	0.353978	<1E-15	0.521729	<1E-15	0.0650298	0.0782933	-0.0502184	0.174122	0.219805	1.75863e-09	0.267502	1.70974e-13	0.312842	<1E-15	0.254188	2.7498e-12	0.321744	<1E-15	0.508594	<1E-15	0.0084885	0.818413	0.470011	<1E-15	0.288152	1.77636e-15	0.25459	2.53442e-12	0.187604	3.06332e-07	0.114623	0.00186838	0.108984	0.00311241	0.392211	<1E-15	0.192084	1.5709e-07	0.116512	0.00156691	0.23672	8.3076e-11	0.0687957	0.06248
192	ApoB_by_ApoA1	-0.043054	0.244023	-0.121501	0.000972454	0.201578	3.61757e-08	0.402354	<1E-15	-0.148798	5.18826e-05	0.000114858	0.997521	0.196829	7.60851e-08	0.0324267	0.38035	0.196827	7.61151e-08	0.166767	5.5651e-06	0.149626	4.70638e-05	0.2455	1.54814e-11	-0.0946311	0.0103124	0.19821	6.14131e-08	0.0641767	0.0822935	-0.063818	0.0840242	-0.0121346	0.742756	-0.00236555	0.948987	-0.0865725	0.0189828	0.373414	<1E-15	-0.0705757	0.05598	-0.104006	0.00479292	0.0682646	0.064536	-0.0711264	0.0540865
193	Total_FA	0.0913809	0.0136434	0.0612435	0.0987078	0.386387	<1E-15	0.528397	<1E-15	0.12439	0.000769507	-0.143824	9.85366e-05	0.179034	1.16428e-06	0.278851	1.82077e-14	0.294742	4.44089e-16	0.209087	1.23488e-08	0.33548	<1E-15	0.506932	<1E-15	0.166111	6.62024e-06	0.59112	<1E-15	0.321639	<1E-15	0.320951	<1E-15	0.367401	<1E-15	0.217359	3.11205e-09	0.229614	3.64246e-10	0.53588	<1E-15	0.230601	3.04805e-10	0.18476	5.17257e-07	0.471763	<1E-15	0.178419	1.26824e-06
194	Unsaturation	-0.0608381	0.100963	0.027016	0.466728	-0.0943167	0.0108932	-0.383806	<1E-15	0.124005	0.000799318	0.325313	<1E-15	-0.0325626	0.380318	0.123104	0.000873175	0.139359	0.000161892	0.0573399	0.12217	-0.0375372	0.311813	-0.0309454	0.40444	-0.119461	0.00124109	-0.309789	<1E-15	0.0898419	0.0153165	0.107519	0.00367878	-0.0897164	0.0154607	0.0221245	0.551176	0.068028	0.0665845	-0.583941	<1E-15	0.0346698	0.350244	0.21997	1.9911e-09	-0.318308	<1E-15	0.0541352	0.144508
195	DHA	0.109737	0.00302948	0.192329	1.70161e-07	0.283515	6.21725e-15	0.126108	0.000648772	0.237434	8.67937e-11	0.116415	0.00165314	0.00395645	0.915132	0.379332	<1E-15	0.303726	<1E-15	0.188988	2.79484e-07	0.297631	2.22045e-16	0.400661	<1E-15	0.128118	0.000529916	0.312378	<1E-15	0.416727	<1E-15	0.50531	<1E-15	0.312137	<1E-15	0.316495	<1E-15	0.402739	<1E-15	-0.0456427	0.218685	0.390247	<1E-15	0.425544	<1E-15	0.114733	0.00193131	0.331653	<1E-15
196	LA	0.0459526	0.21557	0.0494314	0.182776	0.322891	<1E-15	0.315938	<1E-15	0.147985	6.12171e-05	-0.0018736	0.959751	0.200896	4.5777e-08	0.336005	<1E-15	0.325928	<1E-15	0.258211	1.49147e-12	0.305177	<1E-15	0.448935	<1E-15	0.137706	0.000193843	0.329242	<1E-15	0.284665	4.88498e-15	0.281077	1.11022e-14	0.313687	<1E-15	0.18397	5.79393e-07	0.20241	3.60778e-08	0.255376	2.65477e-12	0.166513	6.28341e-06	0.222769	1.22588e-09	0.37077	<1E-15	0.159256	1.58051e-05
197	Omega_3	0.18326	6.41282e-07	0.239678	5.69682e-11	0.313096	<1E-15	0.209119	1.22844e-08	0.218555	2.53783e-09	0.0547667	0.139875	0.0575413	0.120862	0.382389	<1E-15	0.315795	<1E-15	0.228683	4.30582e-10	0.316645	<1E-15	0.427607	<1E-15	0.241584	3.97047e-11	0.356049	<1E-15	0.396463	<1E-15	0.471924	<1E-15	0.45032	<1E-15	0.414563	<1E-15	0.482859	<1E-15	0.0963463	0.00929111	0.334006	<1E-15	0.389211	<1E-15	0.271801	8.52651e-14	0.399548	<1E-15
198	Omega_6	0.0437865	0.238016	0.0602515	0.104299	0.361324	<1E-15	0.362644	<1E-15	0.19642	9.15624e-08	-0.00313707	0.932661	0.21127	8.62916e-09	0.388014	<1E-15	0.359795	<1E-15	0.292653	8.88178e-16	0.339513	<1E-15	0.531816	<1E-15	0.124994	0.000724916	0.405893	<1E-15	0.349215	<1E-15	0.369338	<1E-15	0.319387	<1E-15	0.198099	7.07212e-08	0.234029	1.63099e-10	0.238282	7.4073e-11	0.243062	2.99454e-11	0.271082	9.9476e-14	0.345193	<1E-15	0.181488	8.24872e-07
199	PUFA	0.0648502	0.0803624	0.0894516	0.0157685	0.36501	<1E-15	0.351474	<1E-15	0.208557	1.34633e-08	0.00289266	0.937896	0.192284	1.71295e-07	0.399451	<1E-15	0.363397	<1E-15	0.290864	1.11022e-15	0.345949	<1E-15	0.534992	<1E-15	0.146151	7.56203e-05	0.413763	<1E-15	0.367627	<1E-15	0.397952	<1E-15	0.349941	<1E-15	0.236186	1.09501e-10	0.278689	1.86517e-14	0.22399	9.90036e-10	0.2648	3.8014e-13	0.297277	2.22045e-16	0.345913	<1E-15	0.219049	2.33217e-09
200	MUFA	0.109589	0.00306915	0.0329865	0.374144	0.316821	<1E-15	0.531404	<1E-15	0.00898707	0.808724	-0.195533	1.04852e-07	0.144602	9.02242e-05	0.111148	0.0026726	0.216465	3.62147e-09	0.121572	0.00101348	0.232	2.36463e-10	0.347007	<1E-15	0.163658	9.07539e-06	0.559817	<1E-15	0.206093	2.00606e-08	0.154578	2.80473e-05	0.347281	<1E-15	0.191812	1.83843e-07	0.162168	1.09683e-05	0.662086	<1E-15	0.0933466	0.011742	0.0556346	0.133696	0.525142	<1E-15	0.136679	0.000216583
201	SFA	0.0672467	0.069778	0.0422951	0.254397	0.373171	<1E-15	0.561329	<1E-15	0.138502	0.000177783	-0.200815	4.63585e-08	0.150472	4.57765e-05	0.266419	2.70006e-13	0.220541	1.80427e-09	0.184558	5.3248e-07	0.330962	<1E-15	0.508742	<1E-15	0.15216	3.74824e-05	0.641347	<1E-15	0.3158	<1E-15	0.337538	<1E-15	0.318819	<1E-15	0.174301	2.23343e-06	0.197632	7.60143e-08	0.572926	<1E-15	0.292869	8.88178e-16	0.164192	8.47666e-06	0.438479	<1E-15	0.140556	0.000141924
202	DHA_pct	0.0824801	0.0260542	0.18531	4.77807e-07	0.157425	1.98211e-05	-0.0879851	0.0175729	0.221256	1.5946e-09	0.202409	3.60834e-08	-0.0759206	0.040571	0.307062	<1E-15	0.210585	9.66034e-09	0.115352	0.00182432	0.194118	1.29974e-07	0.233062	1.94758e-10	0.0654253	0.0777103	0.102569	0.00560549	0.331245	<1E-15	0.432224	<1E-15	0.187466	3.4937e-07	0.257874	1.59806e-12	0.350613	<1E-15	-0.289402	1.77636e-15	0.32677	<1E-15	0.397614	<1E-15	-0.0823848	0.0262277	0.292962	6.66134e-16
203	LA_pct	-0.0461136	0.213965	0.00390326	0.916269	0.029181	0.431774	-0.167414	5.58807e-06	0.0732764	0.0481134	0.189555	2.57064e-07	0.101279	0.00623835	0.187867	3.29477e-07	0.156957	2.09936e-05	0.125842	0.000666268	0.0678785	0.0671861	0.070632	0.0567981	0.00622474	0.866846	-0.23767	8.30642e-11	0.0375944	0.311076	0.0291055	0.432966	0.0236842	0.523457	0.00342246	0.926551	0.0176258	0.634937	-0.289826	1.33227e-15	-0.0212821	0.566441	0.128178	0.000526721	-0.012397	0.738434	0.0261733	0.480747
204	Omega_3_pct	0.18996	2.42123e-07	0.276659	2.93099e-14	0.143429	0.000103017	-0.0941282	0.0110537	0.210569	9.68686e-09	0.18528	4.79855e-07	-0.0502397	0.175715	0.291604	8.88178e-16	0.200152	5.14196e-08	0.137567	0.000196794	0.179473	1.09503e-06	0.201636	4.07554e-08	0.202432	3.59482e-08	0.0525762	0.156446	0.292261	8.88178e-16	0.382756	<1E-15	0.335395	<1E-15	0.401988	<1E-15	0.475209	<1E-15	-0.25939	1.17106e-12	0.256959	1.92579e-12	0.378876	<1E-15	0.0189598	0.609539	0.407074	<1E-15
205	Omega_6_pct	-0.068701	0.0639314	0.0127249	0.731778	-0.00576632	0.876571	-0.268023	1.92069e-13	0.13091	0.000398135	0.273157	6.35048e-14	0.0863136	0.0198477	0.222493	1.28619e-09	0.164154	8.51753e-06	0.138672	0.000174525	0.0421194	0.256377	0.0741365	0.0455405	-0.0696559	0.0603165	-0.306979	<1E-15	0.0684114	0.0650621	0.0903811	0.0147109	-0.0716261	0.0533917	-0.0286871	0.439611	0.0104872	0.777574	-0.527462	<1E-15	0.0383486	0.301462	0.173587	2.46034e-06	-0.211685	8.05815e-09	0.0143163	0.69977
206	PUFA_pct	-0.0165054	0.656605	0.078304	0.0346547	0.0257649	0.487621	-0.260582	9.16156e-13	0.167629	5.43337e-06	0.278427	1.9984e-14	0.0601239	0.105037	0.261451	7.65166e-13	0.186853	3.82058e-07	0.150931	4.33621e-05	0.075085	0.0428383	0.11111	0.00268153	-0.0155536	0.675244	-0.262901	5.65992e-13	0.125964	0.000658153	0.165429	7.23057e-06	0.0162665	0.661264	0.0692888	0.061686	0.118415	0.00137056	-0.528652	<1E-15	0.0918844	0.0131322	0.240005	5.35583e-11	-0.181092	8.72315e-07	0.106236	0.00411005
207	MUFA_pct	0.0861006	0.0201553	-0.0368361	0.320944	0.00565769	0.878878	0.233311	1.861e-10	-0.222611	1.26001e-09	-0.211849	7.84288e-09	0.00958288	0.796313	-0.281698	9.54792e-15	-0.056356	0.128722	-0.10476	0.00466178	-0.0757573	0.0410061	-0.134046	0.000286821	0.0760186	0.0403122	0.197695	7.52745e-08	-0.124501	0.000761113	-0.241389	4.12061e-11	0.120802	0.00109162	0.043356	0.242667	-0.0484447	0.191679	0.554954	<1E-15	-0.231943	2.38916e-10	-0.213793	5.67641e-09	0.328373	<1E-15	-0.0144947	0.696213
208	SFA_pct	-0.0892898	0.0159593	-0.0842741	0.0229673	-0.0579837	0.118026	0.0895078	0.0157027	0.015802	0.670359	-0.160247	1.39665e-05	-0.107512	0.00368097	-0.0671623	0.0701302	-0.218912	2.38744e-09	-0.114981	0.00188785	-0.0245594	0.508221	-0.010368	0.780036	-0.076409	0.0392935	0.13724	0.000203875	-0.0280531	0.449792	0.0272049	0.463618	-0.190112	2.36737e-07	-0.180253	9.81695e-07	-0.14584	7.83656e-05	0.100085	0.00687992	0.15198	3.82922e-05	-0.0943879	0.010833	-0.131601	0.000370609	-0.168329	4.95731e-06
209	Glucose	-0.592725	<1E-15	-0.637316	<1E-15	0.0218992	0.557152	0.0121559	0.744539	-0.0514992	0.167173	-0.029914	0.422541	-0.0483913	0.194328	0.0942322	0.0113571	0.0395549	0.288836	0.045722	0.220118	0.0609872	0.101782	0.107125	0.00397977	-0.599447	<1E-15	0.137093	0.000222312	0.0761463	0.0409477	0.0879862	0.0181257	-0.431965	<1E-15	-0.52925	<1E-15	-0.482345	<1E-15	-0.0242417	0.515762	0.0475755	0.201963	0.0165494	0.657308	-0.158651	1.87091e-05	-0.499102	<1E-15
210	Lactate	0.683154	<1E-15	0.739013	<1E-15	0.0723957	0.049925	0.00523998	0.887299	0.100307	0.00653236	-0.0121799	0.741828	0.0361503	0.328049	0.0446154	0.227324	0.0402515	0.276112	0.01043	0.777867	0.010177	0.783118	-0.0317982	0.389657	0.642903	<1E-15	-0.0502671	0.173704	0.02571	0.486757	0.035207	0.340837	0.593695	<1E-15	0.644881	<1E-15	0.614577	<1E-15	0.0663617	0.0723646	0.0359583	0.330627	0.0860893	0.0196625	0.282852	5.77316e-15	0.607656	<1E-15
211	Pyruvate	0.570278	<1E-15	0.550865	<1E-15	0.114519	0.00192764	0.0512519	0.166286	0.0975393	0.00831626	-0.0217245	0.557587	0.103809	0.00496225	0.0711283	0.0545754	0.0820324	0.0265648	0.0802791	0.0299843	0.0321212	0.385833	0.0450624	0.223648	0.497933	<1E-15	0.00959071	0.795738	0.0526174	0.155268	0.0781032	0.0347475	0.573396	<1E-15	0.588694	<1E-15	0.57663	<1E-15	0.0930131	0.0118712	0.0257376	0.487185	0.0854356	0.0208774	0.311025	<1E-15	0.559192	<1E-15
212	Citrate	0.185449	4.20026e-07	0.217482	2.62494e-09	0.139819	0.00014454	-0.0131471	0.722145	0.124185	0.00074675	0.172984	2.42715e-06	0.0595202	0.10713	0.192271	1.52719e-07	0.0711261	0.0540876	0.0509942	0.167556	0.0718828	0.0515731	0.0440452	0.233325	0.185706	4.04589e-07	-0.0657291	0.0751331	0.0464791	0.208477	0.117093	0.00148362	0.154968	2.47789e-05	0.140063	0.000140683	0.200723	4.14114e-08	-0.149313	4.88322e-05	0.178688	1.10421e-06	0.200218	4.48438e-08	0.0965865	0.00883358	0.226613	5.29858e-10
213	Glycerol	0.229082	1.0254e-09	0.206883	3.80023e-08	0.192696	3.13358e-07	0.168135	8.4647e-06	0.0690303	0.0691535	0.0146766	0.699524	0.0402505	0.289659	0.0547411	0.149705	0.040476	0.286962	0.00840262	0.825122	-0.000134646	0.997175	0.0536826	0.157751	0.27077	3.97904e-13	0.0420421	0.268707	-0.00425098	0.910993	-0.0307137	0.419178	0.23055	7.96564e-10	0.168273	8.31967e-06	0.144305	0.000136351	0.18689	7.11203e-07	0.0424451	0.264141	0.0687925	0.070119	0.316934	<1E-15	0.206122	4.27209e-08
214	Ala	0.464456	<1E-15	0.4859	<1E-15	0.0505492	0.171299	0.00681343	0.853794	0.107134	0.00366137	-0.093943	0.0108828	-0.013193	0.721214	0.0904817	0.0141977	0.00852927	0.817556	0.0146982	0.690959	0.114506	0.00188879	0.0136902	0.711168	0.49343	<1E-15	0.123803	0.000775596	0.0899943	0.0147296	0.152302	3.422e-05	0.628131	<1E-15	0.584986	<1E-15	0.614204	<1E-15	0.173423	2.28634e-06	0.102493	0.00544657	0.140998	0.000126784	0.450992	<1E-15	0.561808	<1E-15
215	Gln	-0.216371	3.33457e-09	-0.220563	1.62259e-09	0.0826265	0.0253842	-0.0983434	0.00775303	0.0384604	0.298725	0.0425564	0.250169	-0.0836474	0.023622	0.0960709	0.0093001	0.043064	0.244559	-0.0363179	0.326473	0.03541	0.33872	0.0488534	0.186741	-0.192177	1.61031e-07	0.129435	0.000446913	0.0576557	0.119107	0.108591	0.00326466	-0.00586367	0.874162	-0.114371	0.00194011	-0.0798778	0.0307036	0.0373822	0.312486	0.0946874	0.0103713	0.104252	0.00475069	0.172126	2.81328e-06	-0.131509	0.00036045
216	Gly	0.445282	<1E-15	0.420519	<1E-15	-0.0226669	0.539788	-0.0312551	0.397809	-0.0308366	0.404161	-0.00397786	0.914324	0.0135766	0.713459	-0.0342264	0.354463	0.0367509	0.320072	-0.0203163	0.582637	-0.0110766	0.764491	-0.130282	0.000402039	0.442727	<1E-15	-0.0424546	0.250657	-0.0347231	0.347518	-0.0520079	0.159258	0.483012	<1E-15	0.506951	<1E-15	0.46416	<1E-15	0.0724497	0.049754	-0.0999651	0.0067187	-0.0224514	0.54365	0.285252	3.33067e-15	0.475453	<1E-15
217	His	0.38472	<1E-15	0.376998	<1E-15	0.0519264	0.160199	-0.031068	0.400963	0.133375	0.000293434	-0.115757	0.00169398	-0.053183	0.15031	0.0463215	0.210337	-0.0815182	0.0273191	-0.0355501	0.336481	0.00337329	0.927355	0.043651	0.237861	0.404753	<1E-15	0.0766832	0.037928	0.0119363	0.74698	0.0846551	0.0218968	0.481261	<1E-15	0.437961	<1E-15	0.448565	<1E-15	0.121738	0.000957985	0.0520165	0.159474	0.0509872	0.167905	0.342921	<1E-15	0.388138	<1E-15
218	Ile	0.285173	3.33067e-15	0.231949	2.01356e-10	0.0622261	0.0920629	0.160724	1.2117e-05	0.015038	0.684195	-0.267059	1.88294e-13	-0.0355605	0.336008	-0.142862	0.000102829	-0.175566	1.70461e-06	-0.112506	0.00226896	-0.0214148	0.562415	0.00426084	0.908255	0.321189	<1E-15	0.152385	3.38813e-05	-0.0748053	0.0427604	-0.0663596	0.0723737	0.31239	<1E-15	0.260039	8.27338e-13	0.223597	9.05759e-10	0.401153	<1E-15	-0.00439925	0.905288	-0.0806477	0.0289051	0.332396	<1E-15	0.205091	2.06296e-08
219	Leu	0.340164	<1E-15	0.291539	8.88178e-16	0.0439534	0.234302	0.124997	0.000688766	0.0597555	0.105747	-0.263086	4.37428e-13	-0.0380853	0.302804	-0.113485	0.00207482	-0.199801	4.78831e-08	-0.105806	0.00410852	-0.0321006	0.385162	0.0125764	0.733738	0.372714	<1E-15	0.120037	0.00112062	-0.0747721	0.042853	-0.0394909	0.285296	0.329999	<1E-15	0.292949	4.44089e-16	0.274482	3.73035e-14	0.338156	<1E-15	0.0149017	0.686906	-0.0718754	0.0515974	0.292655	4.44089e-16	0.249548	6.97709e-12
220	Val	0.286849	2.22045e-15	0.243028	2.50102e-11	0.0182172	0.62219	0.107847	0.00344011	0.0406465	0.271424	-0.296383	2.22045e-16	-0.0564777	0.126331	-0.147889	5.77101e-05	-0.265349	2.70894e-13	-0.137977	0.000177036	-0.052674	0.153977	-0.0010305	0.977765	0.297376	2.22045e-16	0.0832704	0.024066	-0.0952077	0.00985499	-0.0621506	0.0924585	0.226088	5.82054e-10	0.200768	4.11214e-08	0.187152	3.27399e-07	0.266532	2.10498e-13	0.0314635	0.394669	-0.101195	0.00606945	0.173975	2.12056e-06	0.170929	3.20374e-06
221	Phe	0.335831	<1E-15	0.272388	5.9508e-14	0.0204617	0.579942	0.0165759	0.653903	-0.0415435	0.260978	-0.183406	5.64625e-07	0.0400788	0.27818	-0.173745	2.1883e-06	-0.143945	9.09416e-05	-0.0684037	0.0639922	-0.114712	0.00185315	-0.075022	0.0421609	0.306081	<1E-15	-0.0363559	0.325304	-0.116444	0.00157693	-0.176263	1.54813e-06	0.226796	5.12774e-10	0.27225	6.12843e-14	0.185262	4.31578e-07	0.260587	7.38076e-13	-0.140562	0.000133102	-0.181626	7.28695e-07	0.128156	0.000500475	0.21431	4.50314e-09
222	Tyr	0.221601	1.35448e-09	0.212507	6.39451e-09	0.0111483	0.763326	0.119802	0.00116442	0.0399175	0.280779	-0.261515	6.53699e-13	-0.000901754	0.980569	-0.0715041	0.0531439	-0.207087	1.56141e-08	-0.0600673	0.10441	-0.0143055	0.6992	0.00593764	0.872587	0.228601	3.91489e-10	0.117993	0.00138345	-0.0578449	0.117898	-0.0246121	0.506142	0.257361	1.54299e-12	0.220456	1.65318e-09	0.210893	8.36317e-09	0.268934	1.35669e-13	0.0176562	0.633421	-0.103311	0.00514442	0.249956	6.87095e-12	0.16662	5.84249e-06
223	bOHbutyrate	-0.494514	<1E-15	-0.446689	<1E-15	-0.0407609	0.270075	-0.0408586	0.268928	-0.0905536	0.0141207	0.0223126	0.546145	-0.093536	0.0112332	-0.0459603	0.213606	-0.118721	0.00127144	-0.0969896	0.00855339	-0.0153728	0.677556	-0.0811978	0.0278261	-0.384693	<1E-15	0.0133503	0.718031	0.00436495	0.906023	0.00975081	0.791989	-0.412728	<1E-15	-0.429417	<1E-15	-0.384564	<1E-15	-0.0518808	0.160281	0.0313887	0.395795	-0.00931285	0.801131	-0.201597	3.60667e-08	-0.389105	<1E-15
224	Acetate	0.0272372	0.461244	0.111834	0.00241167	0.122998	0.000839844	-0.0375288	0.309929	0.0401345	0.277512	0.0398439	0.281008	-0.0132619	0.71982	0.012636	0.732525	-0.0618093	0.0942663	-0.129757	0.000424525	-0.0576856	0.118411	-0.0834738	0.023722	0.126613	0.000585478	-0.125382	0.000662719	-0.0876123	0.0175893	-0.0482577	0.19157	-0.0642457	0.081964	-0.0610448	0.0984175	-0.0399437	0.279804	-0.118937	0.00124541	0.0311547	0.399328	0.0141255	0.702417	-0.0692125	0.0609048	0.00833511	0.821639
225	Acetoacetate	0.323681	<1E-15	0.347403	<1E-15	0.196881	7.5484e-08	-0.0357713	0.333149	0.184244	5.00306e-07	0.200953	3.99359e-08	0.164852	7.14328e-06	0.186171	3.77999e-07	0.164145	7.82689e-06	0.124367	0.000733393	0.0483226	0.190972	0.157093	1.90832e-05	0.321465	<1E-15	-0.103433	0.00503155	0.0781178	0.0343425	0.114438	0.00190067	0.271575	7.08322e-14	0.309355	<1E-15	0.346705	<1E-15	-0.0835403	0.0236104	0.14588	7.28562e-05	0.236749	8.26219e-11	0.121229	0.000998511	0.382735	<1E-15
226	Creatinine	0.00997706	0.787419	-0.0232408	0.529852	-0.00447363	0.90376	0.0625436	0.0906327	-0.0218816	0.554197	0.0428472	0.246621	0.0952127	0.00990155	-0.034249	0.354474	0.0325087	0.379472	0.0406531	0.271674	-0.061811	0.0944825	0.0285748	0.439836	0.0056488	0.878654	-0.0651326	0.0780254	-0.012424	0.737017	-0.0801816	0.0299595	-0.0683351	0.0644424	-0.0257065	0.487115	-0.0731047	0.0478718	-0.00882604	0.811452	-0.0626969	0.0898432	-0.0305584	0.408736	-0.0933126	0.0114862	-0.0470471	0.203273
227	Albumin	0.355844	<1E-15	0.400495	<1E-15	0.113598	0.00205353	0.0190497	0.606365	0.161261	1.13213e-05	0.0316285	0.392193	0.0292035	0.429519	0.158435	1.61541e-05	0.0926844	0.0119989	0.0259682	0.482391	0.0565232	0.126025	0.0917526	0.0128893	0.438586	<1E-15	0.0538161	0.145232	0.124589	0.00071736	0.143386	9.69091e-05	0.462385	<1E-15	0.465723	<1E-15	0.478495	<1E-15	0.00972836	0.792457	0.107369	0.00358718	0.125725	0.000640297	0.266999	1.90514e-13	0.40699	<1E-15
228	GlycA	0.18961	2.2759e-07	0.0312873	0.397323	0.0490203	0.184637	0.1789	1.07174e-06	-0.195522	9.30658e-08	0.0397867	0.281701	0.284551	3.9968e-15	-0.166199	5.99466e-06	0.159154	1.4766e-05	0.123596	0.000791704	-0.0909243	0.0137294	0.0415278	0.261159	0.0776419	0.0354572	-0.0168252	0.649044	-0.0321324	0.38469	-0.236253	9.0667e-11	0.0652925	0.0770938	0.1285	0.000483148	-0.0180282	0.625809	0.293255	4.44089e-16	-0.237839	6.73075e-11	-0.134377	0.000261262	0.0854565	0.0205848	0.080136	0.0299409
[truncated: 30 more columns]

## Sheet: S7
S7: Association of breastfeeding status at 6m and 6m NMR metabolomics biomarkers
Biomarker #	NMR Biomarker	beta	95% Lower CI	95% Upper CI	p-value	pvalue (BH)1
1	Total_C	0.474227	0.327746	0.620709	2.22343e-10	1.23524e-09
2	non_HDL_C	0.378923	0.232028	0.525819	4.28817e-07	1.08287e-06
3	Remnant_C	0.314381	0.167175	0.461588	2.84277e-05	6.0743e-05
4	VLDL_C	0.0360648	-0.113025	0.185155	0.635417	0.681777
5	Clinical_LDL_C	0.377665	0.230048	0.525283	5.32232e-07	1.31741e-06
6	LDL_C	0.381029	0.23338	0.528678	4.23877e-07	1.08132e-06
7	HDL_C	0.449774	0.300924	0.598624	3.17846e-09	1.41896e-08
8	Total_TG	-0.0439973	-0.194202	0.106207	0.565894	0.620498
9	VLDL_TG	-0.140864	-0.291171	0.00944232	0.0662336	0.0940818
10	LDL_TG	0.416688	0.272907	0.560469	1.34681e-08	4.74228e-08
11	HDL_TG	0.28376	0.135413	0.432108	0.000177541	0.00033882
12	Total_PL	0.49502	0.348706	0.641333	3.3404e-11	2.25703e-10
13	VLDL_PL	-0.0551818	-0.204882	0.0945184	0.470001	0.531583
14	LDL_PL	0.434404	0.288375	0.580433	5.53294e-09	2.17019e-08
15	HDL_PL	0.49553	0.34835	0.64271	4.15222e-11	2.73172e-10
16	Total_CE	0.487213	0.340659	0.633766	7.24123e-11	4.52577e-10
17	VLDL_CE	0.0932198	-0.0554598	0.241899	0.21912	0.271188
18	LDL_CE	0.347629	0.199457	0.495802	4.26049e-06	9.68293e-06
19	HDL_CE	0.407794	0.258287	0.557301	9.00096e-08	2.61656e-07
20	Total_FC	0.432274	0.285917	0.578631	7.09452e-09	2.66969e-08
21	VLDL_FC	-0.0375932	-0.187093	0.111907	0.622116	0.670383
22	LDL_FC	0.440937	0.294176	0.587697	3.89661e-09	1.67957e-08
23	HDL_FC	0.57612	0.43001	0.72223	1.09596e-14	1.19127e-13
24	Total_L	0.408996	0.262	0.555991	4.94828e-08	1.54634e-07
25	VLDL_L	-0.0758226	-0.225909	0.0742642	0.322095	0.372795
26	LDL_L	0.422265	0.275767	0.568762	1.61114e-08	5.59422e-08
27	HDL_L	0.490068	0.342417	0.637719	7.76935e-11	4.73741e-10
28	Total_P	0.485079	0.336992	0.633166	1.36339e-10	7.74653e-10
29	VLDL_P	0.0856712	-0.0628982	0.23424	0.258392	0.310567
30	LDL_P	0.253687	0.106385	0.400989	0.000736882	0.00132533
31	HDL_P	0.469218	0.320916	0.61752	5.60948e-10	2.80474e-09
32	VLDL_size	-0.388331	-0.53618	-0.240482	2.63656e-07	6.93833e-07
33	LDL_size	0.0805441	-0.0709122	0.232	0.297268	0.347276
34	HDL_size	0.301867	0.150959	0.452775	8.83605e-05	0.000175318
35	Phosphoglyc	0.438456	0.29105	0.585863	5.55568e-09	2.17019e-08
36	TG_by_PG	-0.271111	-0.421472	-0.120751	0.000409451	0.000756045
37	Cholines	0.417643	0.269664	0.565622	3.1763e-08	1.05877e-07
38	Phosphatidylc	0.359663	0.211089	0.508237	2.08997e-06	4.83789e-06
39	Sphingomyelins	0.646077	0.50322	0.788935	7.79365e-19	1.08245e-17
40	ApoB	0.269771	0.122735	0.416806	0.000323194	0.000607507
41	ApoA1	0.488766	0.341129	0.636404	8.67742e-11	5.04501e-10
42	ApoB_by_ApoA1	-0.0418785	-0.190248	0.106491	0.580115	0.633313
43	Total_FA	0.200806	0.05123	0.350381	0.00850726	0.0135466
44	Unsaturation	0.395865	0.247445	0.544285	1.7183e-07	4.6693e-07
45	Omega_3	0.973394	0.844139	1.10265	2.90865e-49	1.0388e-47
46	Omega_6	-0.134164	-0.285047	0.0167194	0.0813718	0.113648
47	PUFA	0.0871853	-0.0634	0.237771	0.256469	0.309745
48	MUFA	-0.153252	-0.303512	-0.00299092	0.0456109	0.0678734
49	SFA	0.56531	0.421063	0.709557	1.58522e-14	1.65127e-13
50	LA	-0.422419	-0.57075	-0.274087	2.3855e-08	8.05913e-08
51	DHA	0.830823	0.694708	0.966938	5.65214e-33	1.17753e-31
52	Omega_3_pct	1.02271	0.895151	1.15026	1.34118e-55	5.58823e-54
53	Omega_6_pct	-0.69644	-0.838192	-0.554688	6.0476e-22	9.44938e-21
54	PUFA_pct	-0.313769	-0.463769	-0.163769	4.13514e-05	8.68727e-05
55	MUFA_pct	-0.705282	-0.847358	-0.563206	2.27788e-22	3.79647e-21
56	SFA_pct	1.39997	1.28859	1.51135	9.49261e-134	2.37315e-131
57	LA_pct	-1.08941	-1.21755	-0.96126	2.58109e-62	1.61318e-60
58	DHA_pct	0.692309	0.550472	0.834147	1.11539e-21	1.64028e-20
59	PUFA_by_MUFA	0.30491	0.155151	0.454669	6.59485e-05	0.000136257
60	Omega_6_by_Omega_3	-1.11352	-1.23637	-0.990657	1.60762e-70	2.00953e-68
61	Ala	-0.092688	-0.244926	0.0595501	0.232753	0.286642
62	Gln	0.753745	0.611704	0.895786	2.46674e-25	4.74373e-24
63	Gly	-0.442162	-0.589785	-0.294539	4.34609e-09	1.84156e-08
64	His	-0.271115	-0.422989	-0.11924	0.00046742	0.000852956
65	Total_BCAA	-1.06212	-1.19004	-0.934195	1.62084e-59	8.1042e-58
66	Ile	-0.96159	-1.09423	-0.82895	8.18495e-46	2.5578e-44
67	Leu	-0.961919	-1.09509	-0.82875	1.70384e-45	4.73289e-44
68	Val	-1.0888	-1.2147	-0.962904	2.15197e-64	1.79331e-62
69	Phe	-0.896073	-1.03059	-0.761556	5.88072e-39	1.33653e-37
70	Tyr	-0.903679	-1.03669	-0.770665	1.8837e-40	4.70925e-39
71	Glucose	0.399135	0.250453	0.547817	1.42888e-07	4.05931e-07
72	Lactate	-0.195877	-0.347092	-0.0446626	0.0111215	0.0173774
73	Pyruvate	-0.104773	-0.256642	0.0470956	0.176322	0.223759
74	Citrate	0.559924	0.413702	0.706146	6.13548e-14	5.8995e-13
75	Glycerol	0.0947656	-0.0784893	0.268021	0.283699	0.33455
76	bOHbutyrate	0.748945	0.607466	0.890424	3.24874e-25	5.80132e-24
77	Acetate	0.435764	0.289509	0.582019	5.23074e-09	2.10917e-08
78	Acetoacetate	0.626099	0.480379	0.771819	3.73813e-17	4.91859e-16
79	Acetone	0.60296	0.456785	0.749135	6.3064e-16	7.883e-15
80	Creatinine	-0.399875	-0.54973	-0.25002	1.69545e-07	4.65784e-07
81	Albumin	0.252965	0.101724	0.404206	0.00104463	0.00182627
82	GlycA	-0.280344	-0.431948	-0.128739	0.000289775	0.000548817
83	XXL_VLDL_P	-0.424896	-0.573662	-0.276129	2.1715e-08	7.43666e-08
84	XXL_VLDL_L	-0.465333	-0.613053	-0.317614	6.66201e-10	3.20289e-09
85	XXL_VLDL_PL	-0.503037	-0.650987	-0.355086	2.67038e-11	1.85443e-10
86	XXL_VLDL_C	-0.507656	-0.654729	-0.360583	1.33279e-11	9.7999e-11
87	XXL_VLDL_CE	-0.437721	-0.585991	-0.289452	7.20619e-09	2.66969e-08
88	XXL_VLDL_FC	-0.559118	-0.705056	-0.413181	5.96729e-14	5.8995e-13
89	XXL_VLDL_TG	-0.476681	-0.624605	-0.328757	2.69037e-10	1.43105e-09
90	XL_VLDL_P	-0.116604	-0.267806	0.0345987	0.130666	0.172838
91	XL_VLDL_L	-0.147836	-0.299096	0.00342293	0.0554145	0.0805444
92	XL_VLDL_PL	-0.145492	-0.297477	0.00649424	0.0606253	0.0876089
93	XL_VLDL_C	-0.156827	-0.307623	-0.00603107	0.0415148	0.0625223
94	XL_VLDL_CE	-0.105971	-0.256749	0.0448072	0.168352	0.215836
95	XL_VLDL_FC	-0.20735	-0.358256	-0.0564437	0.00708065	0.0114946
96	XL_VLDL_TG	-0.143705	-0.294804	0.00739342	0.062313	0.0895302
97	L_VLDL_P	-0.128521	-0.279114	0.0220718	0.0943858	0.130367
98	L_VLDL_L	-0.114772	-0.265538	0.0359939	0.135687	0.177601
99	L_VLDL_PL	-0.128433	-0.279985	0.0231185	0.0967166	0.13213
100	L_VLDL_C	-0.109564	-0.260244	0.0411155	0.154111	0.199626
101	L_VLDL_CE	-0.0846356	-0.235217	0.0659463	0.270628	0.322176
102	L_VLDL_FC	-0.13357	-0.284297	0.0171568	0.0824104	0.114459
103	L_VLDL_TG	-0.108132	-0.258821	0.0425572	0.159593	0.205661
104	M_VLDL_P	-0.00905416	-0.158647	0.140538	0.90557	0.927157
105	M_VLDL_L	0.00126152	-0.14874	0.151263	0.986849	0.986849
106	M_VLDL_PL	0.00881763	-0.141742	0.159377	0.908614	0.927157
107	M_VLDL_C	0.115043	-0.0344747	0.26456	0.131541	0.173081
108	M_VLDL_CE	0.151794	0.00189151	0.301697	0.0471784	0.06938
109	M_VLDL_FC	0.0801134	-0.0693481	0.229575	0.293456	0.344432
110	M_VLDL_TG	-0.0878598	-0.238324	0.0626048	0.252428	0.306344
111	S_VLDL_P	0.00321093	-0.145637	0.152059	0.966275	0.970156
112	S_VLDL_L	0.0489783	-0.0999197	0.197876	0.519115	0.574242
113	S_VLDL_PL	0.0872855	-0.0612801	0.235851	0.249516	0.304288
114	S_VLDL_C	0.124498	-0.0232311	0.272228	0.0985849	0.133223
115	S_VLDL_CE	0.124588	-0.022895	0.272072	0.0977814	0.132855
116	S_VLDL_FC	0.116709	-0.0316882	0.265107	0.123209	0.163841
117	S_VLDL_TG	-0.0518182	-0.201878	0.0982419	0.498526	0.553918
118	XS_VLDL_P	0.402268	0.258173	0.546363	4.46643e-08	1.43155e-07
119	XS_VLDL_L	0.377679	0.233216	0.522141	2.99362e-07	7.7959e-07
120	XS_VLDL_PL	0.295508	0.150121	0.440895	6.78581e-05	0.000138879
121	XS_VLDL_C	0.458011	0.314159	0.601863	4.38204e-10	2.23574e-09
122	XS_VLDL_CE	0.463923	0.319513	0.608333	3.05688e-10	1.59213e-09
123	XS_VLDL_FC	0.424285	0.280944	0.567625	6.5883e-09	2.53396e-08
124	XS_VLDL_TG	0.204883	0.0576869	0.35208	0.00637052	0.0104094
125	IDL_P	0.404334	0.258716	0.549952	5.27008e-08	1.62657e-07
126	IDL_L	0.549158	0.405464	0.692851	6.89525e-14	6.38449e-13
127	IDL_PL	0.513917	0.370122	0.657713	2.48213e-12	1.93916e-11
128	IDL_C	0.545679	0.401156	0.690203	1.36484e-13	1.17658e-12
129	IDL_CE	0.540768	0.395925	0.68561	2.53577e-13	2.11314e-12
130	IDL_FC	0.547973	0.40411	0.691835	8.33862e-14	7.44519e-13
131	IDL_TG	0.391816	0.247816	0.535817	9.6697e-08	2.77865e-07
132	L_LDL_P	0.250424	0.103092	0.397755	0.000864211	0.00153229
133	L_LDL_L	0.460662	0.314529	0.606795	6.47936e-10	3.17615e-09
134	L_LDL_PL	0.470206	0.324379	0.616033	2.62351e-10	1.42582e-09
135	L_LDL_C	0.381344	0.233273	0.529415	4.4724e-07	1.1181e-06
136	L_LDL_CE	0.140235	-0.0112968	0.291767	0.0697012	0.098448
137	L_LDL_FC	0.439158	0.292126	0.58619	4.80089e-09	1.96758e-08
138	L_LDL_TG	0.487564	0.345287	0.62984	1.86302e-11	1.33073e-10
139	M_LDL_P	0.253348	0.105488	0.401208	0.000784402	0.00140072
140	M_LDL_L	0.339656	0.192035	0.487278	6.49645e-06	1.43777e-05
141	M_LDL_PL	0.357739	0.210449	0.50503	1.93303e-06	4.51643e-06
142	M_LDL_C	0.296277	0.14765	0.444903	9.34342e-05	0.000183926
143	M_LDL_CE	0.0951844	-0.0563014	0.24667	0.218128	0.271188
144	M_LDL_FC	0.395167	0.247618	0.542716	1.52836e-07	4.29315e-07
145	M_LDL_TG	0.360152	0.215318	0.504986	1.09521e-06	2.58304e-06
146	S_LDL_P	0.231266	0.0837169	0.378814	0.00212627	0.00366598
147	S_LDL_L	0.315614	0.168655	0.462573	2.56215e-05	5.52188e-05
148	S_LDL_PL	0.383473	0.238125	0.528822	2.32996e-07	6.19671e-07
149	S_LDL_C	0.288617	0.140817	0.436418	0.000129566	0.000251098
150	S_LDL_CE	0.228035	0.0795778	0.376492	0.00260768	0.00443484
151	S_LDL_FC	0.408257	0.261817	0.554696	4.6544e-08	1.47291e-07
152	S_LDL_TG	0.0671698	-0.081902	0.216242	0.377162	0.430551
153	XL_HDL_P	0.438749	0.290104	0.587394	7.26156e-09	2.66969e-08
154	XL_HDL_L	0.354431	0.204177	0.504686	3.77993e-06	8.66957e-06
155	XL_HDL_PL	0.235905	0.0820746	0.389736	0.00265149	0.00447887
156	XL_HDL_C	0.382785	0.233101	0.532468	5.38741e-07	1.32044e-06
157	XL_HDL_CE	0.348898	0.198614	0.499182	5.36272e-06	1.20782e-05
158	XL_HDL_FC	0.455425	0.307689	0.603161	1.52445e-09	7.19079e-09
159	XL_HDL_TG	0.298319	0.150694	0.445944	7.47539e-05	0.000149508
160	L_HDL_P	0.381393	0.231734	0.531052	5.89382e-07	1.43054e-06
161	L_HDL_L	0.41184	0.262745	0.560935	6.17086e-08	1.88136e-07
162	L_HDL_PL	0.449147	0.30085	0.597444	2.92176e-09	1.32807e-08
163	L_HDL_C	0.345442	0.195305	0.49558	6.4987e-06	1.43777e-05
164	L_HDL_CE	0.317537	0.167029	0.468046	3.54947e-05	7.52007e-05
165	L_HDL_FC	0.434718	0.286076	0.58336	9.92952e-09	3.54626e-08
166	L_HDL_TG	0.488077	0.342296	0.633858	5.32401e-11	3.41283e-10
167	M_HDL_P	0.443375	0.295247	0.591502	4.45385e-09	1.85577e-08
168	M_HDL_L	0.451221	0.303498	0.598944	2.14312e-09	9.92183e-09
169	M_HDL_PL	0.44518	0.297741	0.592618	3.2626e-09	1.43097e-08
170	M_HDL_C	0.43523	0.286712	0.583748	9.27401e-09	3.36015e-08
171	M_HDL_CE	0.410611	0.261751	0.559472	6.43856e-08	1.91624e-07
172	M_HDL_FC	0.518275	0.37124	0.665311	4.90658e-12	3.71711e-11
173	M_HDL_TG	0.231891	0.082639	0.381144	0.00232566	0.0039823
174	S_HDL_P	0.38729	0.237562	0.537018	3.98531e-07	1.02714e-06
175	S_HDL_L	0.416546	0.268057	0.565035	3.83936e-08	1.26295e-07
176	S_HDL_PL	0.414933	0.266844	0.563022	3.98341e-08	1.29331e-07
177	S_HDL_C	0.39625	0.2465	0.545999	2.14654e-07	5.77027e-07
178	S_HDL_CE	0.314447	0.16353	0.465365	4.43241e-05	9.23418e-05
179	S_HDL_FC	0.578598	0.433432	0.723764	5.64561e-15	6.41546e-14
180	S_HDL_TG	0.121495	-0.0283688	0.271359	0.112071	0.149828
181	XXL_VLDL_PL_pct	-0.311559	-0.470904	-0.152214	0.000127001	0.000248049
182	XXL_VLDL_C_pct	0.0421404	-0.118017	0.202298	0.606057	0.658757
183	XXL_VLDL_CE_pct	0.1504	-0.00899611	0.309797	0.0644076	0.0920108
184	XXL_VLDL_FC_pct	-0.147276	-0.308205	0.0136527	0.0728621	0.102334
185	XXL_VLDL_TG_pct	-0.234633	-0.395399	-0.0738665	0.00423015	0.00700356
186	XL_VLDL_PL_pct	-0.0751895	-0.228243	0.0778644	0.335619	0.386657
187	XL_VLDL_C_pct	0.0277044	-0.122612	0.178021	0.717922	0.76051
188	XL_VLDL_CE_pct	0.124854	-0.0254326	0.275141	0.103464	0.139065
189	XL_VLDL_FC_pct	-0.333457	-0.482462	-0.184452	1.15365e-05	2.52993e-05
190	XL_VLDL_TG_pct	-0.0486976	-0.200431	0.103036	0.529327	0.582959
191	L_VLDL_PL_pct	-0.100085	-0.253436	0.053266	0.200833	0.251041
192	L_VLDL_C_pct	0.027117	-0.122389	0.176623	0.72222	0.761835
193	L_VLDL_CE_pct	0.0893481	-0.0596509	0.238347	0.239872	0.29396
194	L_VLDL_FC_pct	-0.10004	-0.250298	0.0502181	0.19192	0.241105
195	L_VLDL_TG_pct	0.0242234	-0.125588	0.174035	0.751309	0.78919
196	M_VLDL_PL_pct	0.0147378	-0.137104	0.16658	0.849125	0.884506
197	M_VLDL_C_pct	0.20161	0.0516583	0.351562	0.00840967	0.013477
198	M_VLDL_CE_pct	0.201312	0.0509336	0.35169	0.0086954	0.0137585
199	M_VLDL_FC_pct	0.210335	0.0607834	0.359887	0.00584127	0.00960735
200	M_VLDL_TG_pct	-0.24256	-0.391545	-0.0935761	0.00141787	0.00246158
201	S_VLDL_PL_pct	0.165202	0.0148588	0.315545	0.031266	0.0473727
202	S_VLDL_C_pct	0.202527	0.0543073	0.350747	0.00740455	0.0119428
203	S_VLDL_CE_pct	0.196338	0.0487152	0.34396	0.00914083	0.0143724
204	S_VLDL_FC_pct	0.172081	0.0219993	0.322163	0.0246235	0.0377662
205	S_VLDL_TG_pct	-0.219602	-0.368339	-0.0708649	0.00380648	0.00634414
206	XS_VLDL_PL_pct	-0.409071	-0.558258	-0.259883	7.69385e-08	2.2629e-07
207	XS_VLDL_C_pct	0.372487	0.223248	0.521725	9.99073e-07	2.37874e-06
208	XS_VLDL_CE_pct	0.328658	0.178531	0.478785	1.78108e-05	3.8719e-05
209	XS_VLDL_FC_pct	0.477511	0.333538	0.621484	8.00995e-11	4.76783e-10
210	XS_VLDL_TG_pct	-0.302706	-0.451769	-0.153643	6.88841e-05	0.000138879
211	IDL_PL_pct	-0.399654	-0.549357	-0.249951	1.6738e-07	4.64943e-07
212	IDL_C_pct	0.30616	0.155401	0.456919	6.88406e-05	0.000138879
213	IDL_CE_pct	0.272836	0.121467	0.424205	0.000411288	0.000756045
214	IDL_FC_pct	0.190111	0.0397991	0.340422	0.0131784	0.020337
215	IDL_TG_pct	-0.254231	-0.405075	-0.103387	0.000955527	0.00168227
216	L_LDL_PL_pct	-0.192415	-0.343635	-0.0411942	0.0126355	0.0196204
217	L_LDL_C_pct	0.00414942	-0.148239	0.156538	0.957438	0.96516
218	L_LDL_CE_pct	-0.0551135	-0.20742	0.097193	0.478182	0.533685
219	L_LDL_FC_pct	0.153364	0.0022179	0.30451	0.0467316	0.0691297
220	L_LDL_TG_pct	-0.0834571	-0.235297	0.0683832	0.281359	0.333364
221	M_LDL_PL_pct	-0.0551067	-0.207014	0.0968002	0.477078	0.533685
222	M_LDL_C_pct	-0.0140753	-0.166308	0.138157	0.856197	0.888171
223	M_LDL_CE_pct	-0.0745379	-0.22676	0.0776843	0.337193	0.386689
224	M_LDL_FC_pct	0.290505	0.140748	0.440263	0.000143542	0.000276042
225	M_LDL_TG_pct	-0.0556565	-0.207341	0.0960284	0.472046	0.531583
226	S_LDL_PL_pct	0.128774	-0.0231807	0.280728	0.0967191	0.13213
227	S_LDL_C_pct	0.0192631	-0.13323	0.171757	0.804456	0.841481
228	S_LDL_CE_pct	-0.273238	-0.424544	-0.121932	0.000401019	0.00074817
229	S_LDL_FC_pct	0.376743	0.227887	0.525598	7.03367e-07	1.69079e-06
230	S_LDL_TG_pct	-0.222273	-0.372051	-0.0724943	0.00363054	0.0060915
231	XL_HDL_PL_pct	0.0879578	-0.0671402	0.243056	0.266325	0.31857
232	XL_HDL_C_pct	-0.11203	-0.263986	0.039926	0.14846	0.193307
233	XL_HDL_CE_pct	0.0127152	-0.1389	0.16433	0.869438	0.89818
234	XL_HDL_FC_pct	-0.15751	-0.309908	-0.00511274	0.0427938	0.0640626
235	XL_HDL_TG_pct	-0.0799071	-0.231067	0.0712527	0.300159	0.349023
236	L_HDL_PL_pct	0.0323449	-0.119911	0.184601	0.677139	0.723439
237	L_HDL_C_pct	0.00631731	-0.145591	0.158225	0.935038	0.950242
238	L_HDL_CE_pct	-0.105858	-0.257262	0.0455464	0.170576	0.217571
239	L_HDL_FC_pct	0.409854	0.261299	0.558409	6.39771e-08	1.91624e-07
240	L_HDL_TG_pct	0.0114491	-0.139828	0.162726	0.882077	0.907486
241	M_HDL_PL_pct	-0.268349	-0.419411	-0.117286	0.000498299	0.000902715
242	M_HDL_C_pct	0.167735	0.0164009	0.319069	0.0298275	0.0454687
243	M_HDL_CE_pct	0.00554987	-0.145547	0.156647	0.942609	0.954058
244	M_HDL_FC_pct	0.586506	0.4408	0.732212	3.04664e-15	3.62696e-14
245	M_HDL_TG_pct	-0.0653854	-0.21684	0.0860688	0.397467	0.451667
246	S_HDL_PL_pct	0.0381233	-0.111853	0.1881	0.618333	0.669191
247	S_HDL_C_pct	0.0292109	-0.121868	0.180289	0.704719	0.749701
248	S_HDL_CE_pct	-0.152139	-0.302573	-0.00170424	0.0474605	0.0693866
249	S_HDL_FC_pct	0.519022	0.37593	0.662114	1.16984e-12	9.43423e-12
250	S_HDL_TG_pct	-0.10175	-0.252844	0.0493452	0.186877	0.235956

## Sheet: S8
S8: Association of breastfeeding with lipid species at 6 months
Lipid #	Lipid Species	beta	95% Lower CI	95% Upper CI	p-value	pvalue (BH)1
1	Sph(d16:1)	-0.680071	-0.82372	-0.536422	1.42807e-19	2.69094e-19
2	Sph(d18:1)	-0.232398	-0.381059	-0.0837361	0.00222382	0.00259977
3	Sph(d18:2)	-0.0505806	-0.201649	0.100488	0.511219	0.526297
4	S1P(d16:1)	-0.72549	-0.86517	-0.585809	5.15179e-23	1.05482e-22
5	S1P(d18:0)	-0.164682	-0.31499	-0.0143734	0.031804	0.03581
6	S1P(d18:1)	0.0478097	-0.102284	0.197903	0.531973	0.545365
7	S1P(d18:2)	0.0517482	-0.0978074	0.201304	0.497201	0.514031
8	Cer(d18:0/16:0)	0.355808	0.207803	0.503813	2.80273e-06	3.60422e-06
9	Cer(d18:0/18:0)	1.31764	1.20639	1.42889	1.75143e-91	1.44247e-90
10	Cer(d18:0/20:0)	1.11198	0.986625	1.23734	1.03762e-57	4.29703e-57
11	Cer(d18:0/22:0)	0.387015	0.240357	0.533674	2.81829e-07	3.72889e-07
12	Cer(d18:0/24:0)	0.438778	0.292144	0.585412	6.27297e-09	8.87662e-09
13	Cer(d18:0/24:1)	1.22936	1.11208	1.34664	1.20494e-75	7.18068e-75
14	Cer(d16:1/16:0)	-1.05332	-1.18089	-0.925752	3.25698e-51	1.17028e-50
15	Cer(d16:1/18:0)	-0.071402	-0.219567	0.0767633	0.344452	0.361724
16	Cer(d16:1/20:0)	-0.716091	-0.854073	-0.578109	5.54984e-23	1.13316e-22
17	Cer(d16:1/22:0)	-1.22395	-1.3412	-1.10669	3.79669e-75	2.22638e-74
18	Cer(d16:1/23:0)	-1.28479	-1.39941	-1.17017	4.82787e-84	3.46944e-83
19	Cer(d16:1/24:0)	-1.25823	-1.37295	-1.14351	3.06117e-81	2.03985e-80
20	Cer(d16:1/24:1)	-0.587833	-0.729539	-0.446128	1.50263e-15	2.60384e-15
21	Cer(d17:1/16:0)	-0.407988	-0.55514	-0.260837	7.01768e-08	9.57907e-08
22	Cer(d17:1/18:0)	0.771409	0.635218	0.907601	8.82619e-27	1.94282e-26
23	Cer(d17:1/20:0)	0.376076	0.230615	0.521537	4.83363e-07	6.33819e-07
24	Cer(d17:1/22:0)	-0.604771	-0.74776	-0.461782	4.41481e-16	7.72329e-16
25	Cer(d17:1/23:0)	-0.800911	-0.938573	-0.663249	4.60659e-28	1.0585e-27
26	Cer(d17:1/24:0)	-0.63198	-0.774304	-0.489655	1.67782e-17	3.00695e-17
27	Cer(d17:1/24:1)	0.313949	0.166507	0.46139	3.2442e-05	4.08591e-05
28	Cer(d18:1/14:0)	0.132609	-0.0168904	0.282107	0.0820385	0.0908372
29	Cer(d18:1/16:0)	0.481996	0.337465	0.626528	1.06171e-10	1.59474e-10
30	Cer(d18:1/17:0)	0.552797	0.407957	0.697637	1.8221e-13	2.98566e-13
31	Cer(d18:1/18:0)	1.23893	1.12412	1.35374	3.38798e-79	2.14085e-78
32	Cer(d18:1/19:0)	0.946545	0.814898	1.07819	1.69609e-40	4.95314e-40
33	Cer(d18:1/20:0)	0.946805	0.817887	1.07572	5.38631e-42	1.63147e-41
34	Cer(d18:1/21:0)	0.683591	0.545047	0.822135	4.87512e-21	9.58032e-21
35	Cer(d18:1/22:0)	-0.0471793	-0.195202	0.100843	0.531718	0.545365
36	Cer(d18:1/23:0)	-0.597378	-0.740237	-0.454519	9.11266e-16	1.5866e-15
37	Cer(d18:1/24:0)	-0.391093	-0.537183	-0.245002	1.90651e-07	2.54086e-07
38	Cer(d18:1/24:1)	1.00663	0.87813	1.13513	7.24217e-47	2.44632e-46
39	Cer(d18:1/26:0)	-0.200641	-0.350482	-0.050799	0.00874406	0.0100461
40	Cer(d18:2/14:0)	0.0121735	-0.137819	0.162166	0.87346	0.881882
41	Cer(d18:2/16:0)	0.364435	0.218376	0.510494	1.17571e-06	1.52801e-06
42	Cer(d18:2/17:0)	0.317333	0.167862	0.466804	3.42034e-05	4.29299e-05
43	Cer(d18:2/18:0)	1.01033	0.882044	1.13862	2.72505e-47	9.24752e-47
44	Cer(d18:2/20:0)	0.665244	0.524909	0.805579	1.28915e-19	2.43542e-19
45	Cer(d18:2/21:0)	0.279513	0.132001	0.427024	0.000213718	0.000258935
46	Cer(d18:2/22:0)	-0.311779	-0.458627	-0.164931	3.41755e-05	4.29299e-05
47	Cer(d18:2/23:0)	-0.661966	-0.802716	-0.521217	2.39165e-19	4.48358e-19
48	Cer(d18:2/24:0)	-0.601504	-0.743909	-0.459099	4.80695e-16	8.38928e-16
49	Cer(d18:2/24:1)	0.583628	0.44062	0.726636	4.07819e-15	7.00073e-15
50	Cer(d18:2/26:0)	-0.536184	-0.681488	-0.390881	1.04031e-12	1.64697e-12
51	Cer(d19:1/16:0)	1.11828	0.994096	1.24247	3.67567e-59	1.5756e-58
52	Cer(d19:1/18:0)	1.46164	1.36131	1.56197	5.51397e-124	1.15478e-122
53	Cer(d19:1/20:0)	1.30719	1.19579	1.41858	3.38269e-90	2.69512e-89
54	Cer(d19:1/22:0)	1.39851	1.29363	1.50338	3.30038e-109	4.31996e-108
55	Cer(d19:1/23:0)	1.24835	1.133	1.3637	1.47588e-79	9.48964e-79
56	Cer(d19:1/24:0)	1.36723	1.25972	1.47474	7.8772e-102	9.02185e-101
57	Cer(d19:1/24:1)	1.52512	1.43079	1.61944	4.07864e-143	2.13546e-141
58	Cer(d19:1/26:0)	0.591261	0.446755	0.735767	3.49133e-15	6.00738e-15
59	Cer(d20:1/22:0)	0.935376	0.805806	1.06495	8.88313e-41	2.62554e-40
60	Cer(d20:1/23:0)	0.557011	0.414061	0.699961	5.90782e-14	9.73131e-14
61	Cer(d20:1/24:0)	0.64623	0.505939	0.786521	1.17125e-18	2.15709e-18
62	Cer(d20:1/24:1)	1.31422	1.20465	1.42378	2.88226e-93	2.54542e-92
63	Cer(d20:1/26:0)	-0.11109	-0.262325	0.0401444	0.149723	0.160684
64	Cer(m18:0/20:0)	1.05156	0.925308	1.17781	5.73698e-52	2.09214e-51
65	Cer(m18:0/22:0)	0.118197	-0.0298622	0.266257	0.117501	0.127221
66	Cer(m18:0/23:0)	-0.395088	-0.541642	-0.248533	1.57014e-07	2.10405e-07
67	Cer(m18:0/24:0)	-0.0144611	-0.16342	0.134498	0.848913	0.859466
68	Cer(m18:0/24:1)	0.881221	0.746577	1.01587	1.93672e-34	5.10653e-34
69	Cer(m18:1/18:0)	1.33609	1.22416	1.44802	1.41758e-92	1.22245e-91
70	Cer(m18:1/20:0)	1.18916	1.06877	1.30954	8.58297e-69	4.69501e-68
71	Cer(m18:1/22:0)	0.432516	0.286379	0.578654	9.07439e-09	1.27424e-08
72	Cer(m18:1/23:0)	-0.0702206	-0.220501	0.0800599	0.359304	0.376243
73	Cer(m18:1/24:0)	0.165477	0.0162298	0.314725	0.0298185	0.033626
74	Cer(m18:1/24:1)	1.00019	0.871472	1.1289	3.13437e-46	1.04432e-45
75	Cer1P(d18:1/16:0)	0.115782	-0.0339617	0.265526	0.129472	0.139768
76	HexCer(d16:1/18:0)	0.527321	0.382137	0.672505	2.27528e-12	3.58662e-12
77	HexCer(d16:1/20:0)	-0.0924881	-0.242736	0.0577596	0.227275	0.241089
78	HexCer(d16:1/22:0)	-0.826942	-0.962843	-0.691041	2.40221e-30	5.77317e-30
79	HexCer(d16:1/24:0)	-0.687823	-0.829066	-0.54658	1.46281e-20	2.80691e-20
80	HexCer(d18:1/16:0)	0.643729	0.503067	0.784391	1.90373e-18	3.47123e-18
81	HexCer(d18:1/18:0)	1.32135	1.20923	1.43346	8.51533e-91	6.93527e-90
82	HexCer(d18:1/20:0)	1.11459	0.991651	1.23752	7.94216e-60	3.46524e-59
83	HexCer(d18:1/22:0)	0.423137	0.278109	0.568165	1.45141e-08	2.01493e-08
84	HexCer(d18:1/24:0)	0.576035	0.432733	0.719338	1.00339e-14	1.69076e-14
85	HexCer(d18:1/24:1)	0.918592	0.78782	1.04936	6.57279e-39	1.86018e-38
86	HexCer(d18:2/18:0)	1.17783	1.05686	1.29879	3.2428e-67	1.65068e-66
87	HexCer(d18:2/20:0)	0.964191	0.833551	1.09483	2.37605e-42	7.25685e-42
88	HexCer(d18:2/22:0)	0.533481	0.39004	0.676922	7.00169e-13	1.12058e-12
89	HexCer(d18:2/24:0)	0.575815	0.432835	0.718794	8.98907e-15	1.5182e-14
90	Hex2Cer(d16:1/16:0)	-0.863455	-0.997794	-0.729116	2.24063e-33	5.76274e-33
91	Hex2Cer(d16:1/24:1)	-0.659387	-0.798948	-0.519826	1.67311e-19	3.14458e-19
92	Hex2Cer(d18:1/16:0)	0.141739	-0.00783642	0.291314	0.0632387	0.0703399
93	Hex2Cer(d18:1/18:0)	0.045173	-0.105638	0.195984	0.556714	0.569137
94	Hex2Cer(d18:1/20:0)	0.949155	0.816364	1.08195	4.33549e-40	1.25115e-39
95	Hex2Cer(d18:1/22:0)	0.240999	0.0929656	0.389033	0.00145028	0.0017146
96	Hex2Cer(d18:1/24:0)	-0.0883814	-0.237937	0.0611747	0.246385	0.260983
97	Hex2Cer(d18:1/24:1)	0.159514	0.0111543	0.307873	0.0351243	0.0394879
98	Hex2Cer(d18:2/16:0)	0.462811	0.316687	0.608935	8.19528e-10	1.19903e-09
99	Hex2Cer(d18:2/24:1)	0.572529	0.427936	0.717122	2.39798e-14	3.96776e-14
100	Hex3Cer(d18:1/16:0)	0.540789	0.395596	0.685981	6.4971e-13	1.04438e-12
101	Hex3Cer(d18:1/18:0)	0.804311	0.667414	0.941208	1.50949e-28	3.52374e-28
102	Hex3Cer(d18:1/20:0)	0.805185	0.66799	0.94238	1.7103e-28	3.97983e-28
103	Hex3Cer(d18:1/22:0)	-0.201671	-0.350452	-0.052891	0.00795376	0.00916683
104	Hex3Cer(d18:1/24:0)	-0.233219	-0.383003	-0.0834338	0.00231563	0.0027028
105	Hex3Cer(d18:1/24:1)	0.546056	0.401249	0.690863	3.43786e-13	5.55056e-13
106	GM3(d18:1/16:0)	0.574135	0.430327	0.717942	1.49279e-14	2.49252e-14
107	GM3(d18:1/18:0)	1.19098	1.07147	1.31048	8.76705e-70	4.90553e-69
108	GM3(d18:1/20:0)	1.05677	0.930526	1.18301	2.09328e-52	7.71044e-52
109	GM3(d18:1/22:0)	0.682054	0.542807	0.821302	9.02358e-21	1.75445e-20
110	GM3(d18:1/24:0)	0.431692	0.285223	0.57816	1.04199e-08	1.46038e-08
111	GM3(d18:1/24:1)	1.11123	0.988022	1.23443	2.56463e-59	1.10581e-58
112	GM1(d18:1/16:0)	0.409228	0.262678	0.555778	5.6803e-08	7.76803e-08
113	Sulfatide (d18:1:/16:0(OH))	0.122409	-0.0284407	0.273259	0.111587	0.121175
114	Sulfatide (d18:1:/16:0)	0.198346	0.0483433	0.348348	0.00961788	0.0109812
115	Sulfatide (d18:1:/24:0(OH))	-0.199986	-0.35022	-0.0497512	0.00914522	0.0104905
116	Sulfatide (d18:1:/24:0)	0.0643847	-0.086329	0.215098	0.401959	0.419709
117	Sulfatide (d18:1:/24:1(OH))	0.587984	0.444651	0.731316	2.98276e-15	5.15653e-15
118	Sulfatide (d18:1:/24:1)	0.422468	0.275368	0.569568	2.40114e-08	3.32082e-08
119	SM(34:3)	-0.125235	-0.274067	0.0235968	0.098983	0.108615
120	SM(35:2) (b)	0.858228	0.723964	0.992492	4.65857e-33	1.19396e-32
121	SM(37:1)	0.439068	0.293904	0.584232	4.3401e-09	6.20135e-09
122	SM(37:2)	1.35065	1.24154	1.45976	8.31789e-98	8.46807e-97
123	SM(38:3) (a)	-0.793952	-0.932448	-0.655457	2.38371e-27	5.39277e-27
124	SM(38:3) (b)	1.447	1.34387	1.55013	1.5408e-117	2.82352e-116
125	SM(40:3) (a)	-0.122838	-0.272853	0.0271773	0.108376	0.118038
126	SM(40:3) (b)	1.50679	1.40908	1.60449	3.31908e-134	9.73155e-133
127	SM(41:0)	0.477235	0.335874	0.618595	6.34333e-11	9.60674e-11
128	SM(41:1) (a)	1.12424	1.00253	1.24595	1.09834e-61	4.93918e-61
129	SM(43:1)	1.14485	1.02519	1.26451	2.50725e-65	1.24177e-64
130	SM(43:2) (b)	1.35292	1.24618	1.45965	2.43922e-101	2.75068e-100
131	SM(43:2) (c)	0.38841	0.241819	0.535001	2.52635e-07	3.34867e-07
132	SM(44:1)	0.668898	0.529603	0.808194	4.59986e-20	8.75766e-20
133	SM(44:2)	1.06297	0.938903	1.18704	1.77628e-54	6.88895e-54
134	SM(44:3)	0.401189	0.254888	0.54749	9.67365e-08	1.31554e-07
135	SM(d16:1/19:0)	1.48697	1.38943	1.58452	4.50139e-132	1.26904e-130
136	SM(d16:1/23:0)/SM(d17:1/22:0)	-1.06248	-1.19087	-0.934091	2.09176e-51	7.553e-51
137	SM(d16:1/24:1)	-0.43708	-0.583016	-0.291143	6.08624e-09	8.62904e-09
138	SM(d17:1/14:0)	0.401939	0.255279	0.548599	9.83713e-08	1.3353e-07
139	SM(d17:1/16:0)	0.396369	0.250946	0.541792	1.15138e-07	1.56e-07
140	SM(d17:1/24:1)	0.971671	0.843289	1.10005	3.3099e-44	1.05946e-43
141	SM(d18:0/14:0)	-0.245116	-0.393731	-0.0965023	0.00125563	0.00148688
142	SM(d18:0/16:0)	0.780591	0.644109	0.917072	3.07547e-27	6.91508e-27
143	SM(d18:0/22:0)	0.629854	0.492455	0.767253	1.68029e-18	3.07144e-18
144	SM(d18:1/14:0/SM(d16:1/16:0)	-0.581643	-0.725104	-0.438183	6.04305e-15	1.02774e-14
145	SM(d18:1/16:0)	0.775418	0.638656	0.91218	7.92158e-27	1.75423e-26
146	SM(d18:1/17:0)/SM(d17:1/18:0)	1.41427	1.31145	1.51709	3.14506e-114	5.01158e-113
147	SM(d18:1/18:0/SM(d16:1/20:0)	1.03362	0.907065	1.16017	2.7657e-50	9.88907e-50
148	SM(d18:1/20:0)/SM(d16:1/22:0)	-0.776133	-0.91419	-0.638077	1.96897e-26	4.2954e-26
149	SM(d18:1/22:0)/SM(d16:1/24:0)	-0.605348	-0.748166	-0.462531	3.84312e-16	6.73925e-16
150	SM(d18:1/23:0)/SM(d17:1/24:0)	-0.623001	-0.766993	-0.479008	9.95146e-17	1.75769e-16
151	SM(d18:1/24:0)	-0.264653	-0.413412	-0.115894	0.00050556	0.000604528
152	SM(d18:1/24:1)	0.946345	0.816186	1.0765	2.80495e-41	8.35783e-41
153	SM(d18:2/14:0)	0.519158	0.374197	0.664119	4.47099e-12	6.9877e-12
154	SM(d18:2/16:0)	0.900461	0.767402	1.03352	1.72786e-36	4.69081e-36
155	SM(d18:2/17:0)	1.36551	1.25852	1.4725	2.22017e-102	2.58315e-101
156	SM(d18:2/18:0)	1.35354	1.24632	1.46077	1.02342e-100	1.11965e-99
157	SM(d18:2/18:1)	1.18566	1.06763	1.30368	1.10732e-70	6.24358e-70
158	SM(d18:2/20:0)	1.08385	0.958942	1.20876	1.22352e-55	4.87412e-55
159	SM(d18:2/22:0)	0.396882	0.250787	0.542976	1.26505e-07	1.70456e-07
160	SM(d18:2/23:0)	-0.396886	-0.544741	-0.249031	1.7695e-07	2.36255e-07
161	SM(d18:2/24:0)	0.220458	0.0714198	0.369495	0.00379139	0.00439729
162	SM(d19:1/24:1)	1.5434	1.45189	1.6349	2.16882e-151	1.76638e-149
163	PA(34:1)	-0.100894	-0.250114	0.0483251	0.184806	0.196894
164	PA(36:1)	-0.297526	-0.445537	-0.149514	8.65931e-05	0.000106142
165	PA(36:2)	-0.352843	-0.500758	-0.204928	3.33484e-06	4.28098e-06
166	PA(36:3)	-0.328325	-0.475902	-0.180748	1.42644e-05	1.80897e-05
167	PA(36:4)	-0.0980405	-0.247985	0.0519044	0.199701	0.212454
168	PA(40:6)	0.122115	-0.0257901	0.27002	0.105483	0.11523
169	PC(14:0_16:0)	0.789333	0.650011	0.928656	8.60167e-27	1.8991e-26
170	PC(14:0_20:4)	-0.344396	-0.492821	-0.195971	6.07338e-06	7.74224e-06
171	PC(14:0_22:6)	-0.237234	-0.387575	-0.0868924	0.00202066	0.00237363
172	PC(15-MHDA_18:1)	1.48593	1.3872	1.58467	9.44673e-130	2.47302e-128
173	PC(15-MHDA_18:2)	1.27154	1.15757	1.38551	1.97039e-83	1.38875e-82
174	PC(15-MHDA_20:4)	1.41242	1.30683	1.51801	1.05914e-109	1.41155e-108
175	PC(15-MHDA_22:6)	1.42324	1.32458	1.52191	2.88273e-122	5.71093e-121
176	PC(15:0_20:3)	0.883788	0.749266	1.01831	1.14469e-34	3.05111e-34
177	PC(15:0_20:4)	1.17423	1.05409	1.29438	1.26825e-67	6.54667e-67
178	PC(15:0_22:6)	1.0705	0.950383	1.19062	3.71493e-58	1.55603e-57
179	PC(16:0_16:0)	0.749408	0.60851	0.890306	5.43488e-24	1.13175e-23
180	PC(16:0_18:0)	1.27211	1.15707	1.38715	2.7674e-82	1.8958e-81
181	PC(16:0_18:1)	0.361511	0.212952	0.510071	2.1236e-06	2.74533e-06
182	PC(16:0_18:2)	-0.469813	-0.616153	-0.323473	4.88307e-10	7.18733e-10
183	PC(16:0_18:3) (a)	-0.109529	-0.259873	0.0408158	0.153095	0.164062
184	PC(16:0_18:3) (b)	-0.456233	-0.60201	-0.310455	1.27988e-09	1.85406e-09
185	PC(16:0_20:3) (a)	0.655015	0.512705	0.797325	1.24221e-18	2.28206e-18
186	PC(16:0_20:3) (b)	0.764981	0.625305	0.904657	2.98302e-25	6.37479e-25
187	PC(16:0_20:4)	0.800531	0.662545	0.938518	6.32872e-28	1.44967e-27
188	PC(16:0_20:5)	0.998445	0.870088	1.1268	2.60375e-46	8.71482e-46
189	PC(16:0_22:6)	0.644124	0.505688	0.78256	5.47822e-19	1.01659e-18
190	PC(16:1_18:2)	-0.381507	-0.529587	-0.233427	5.29058e-07	6.92499e-07
191	PC(16:1_20:4)	0.316643	0.167049	0.466238	3.60856e-05	4.52149e-05
192	PC(16:1_22:6)	0.472294	0.328545	0.616044	1.9559e-10	2.91398e-10
193	PC(17:0_18:1)	1.31956	1.20719	1.43194	2.7583e-90	2.2218e-89
194	PC(17:0_18:2)	0.740768	0.601788	0.879749	4.43234e-24	9.28258e-24
195	PC(17:0_20:4)	1.29174	1.17806	1.40542	7.72728e-86	5.9001e-85
196	PC(17:0_22:6)	1.14474	1.02809	1.2614	4.58581e-68	2.43064e-67
197	PC(17:1_18:2)	0.7806	0.641593	0.919606	2.21769e-26	4.79519e-26
198	PC(18:0_18:1)	0.685069	0.545073	0.825065	9.77017e-21	1.89459e-20
199	PC(18:0_18:2)	-0.105369	-0.255845	0.045107	0.169661	0.181021
200	PC(18:0_20:3)	0.937371	0.805312	1.06943	1.29776e-39	3.73042e-39
201	PC(18:0_20:4)	0.907326	0.773873	1.04078	8.7948e-37	2.40544e-36
202	PC(18:0_22:4)	0.701597	0.559703	0.843491	4.07644e-21	8.05398e-21
203	PC(18:0_22:5) (n3)	1.32956	1.21783	1.44128	3.84398e-92	3.27632e-91
204	PC(18:0_22:5) (n6)	0.518616	0.372988	0.664244	5.83287e-12	9.07748e-12
205	PC(18:0_22:6)	0.812743	0.681421	0.944065	2.96498e-31	7.29305e-31
206	PC(18:1_18:1)	-0.455191	-0.600575	-0.309806	1.26066e-09	1.82982e-09
207	PC(18:1_18:2)	-0.733022	-0.870987	-0.595057	6.02769e-24	1.25164e-23
208	PC(18:1_20:3)	0.0791234	-0.0699773	0.228224	0.297873	0.314612
209	PC(18:1_22:6) (a)	-0.500762	-0.64776	-0.353765	4.30848e-11	6.5521e-11
210	PC(18:1_22:6) (b)	1.23138	1.11799	1.34477	5.50729e-80	3.60432e-79
211	PC(18:2_18:2)	-0.674679	-0.815427	-0.533931	5.30323e-20	1.00706e-19
212	PC(18:2_20:5)	0.512418	0.367103	0.657733	9.22969e-12	1.43031e-11
213	PC(20:0_20:4)	-0.271827	-0.420696	-0.122958	0.000358762	0.00043181
214	PC(28:0)	-0.481565	-0.625855	-0.337275	1.02805e-10	1.54735e-10
215	PC(31:0) (a)	1.42328	1.3198	1.52676	3.23715e-114	5.04857e-113
216	PC(31:0) (b)	1.51166	1.41458	1.60875	5.56414e-136	1.77327e-134
217	PC(32:1)	0.714421	0.572193	0.856648	1.04688e-21	2.09662e-21
218	PC(32:2)	-0.882879	-1.01688	-0.748881	7.69007e-35	2.05723e-34
219	PC(33:0) (a)	1.55534	1.46285	1.64782	8.30937e-151	6.09077e-149
220	PC(33:0) (b)	1.5193	1.42259	1.616	1.18836e-137	4.83925e-136
221	PC(33:1)	1.28831	1.17317	1.40345	8.30492e-84	5.9102e-83
222	PC(33:2)	0.6993	0.559486	0.839113	1.51899e-21	3.03383e-21
223	PC(34:5)	0.156133	0.00536796	0.306898	0.0424003	0.0473772
224	PC(35:5)	1.14438	1.02462	1.26413	3.36412e-65	1.65497e-64
225	PC(36:6) (a)	0.746114	0.607473	0.884754	1.72694e-24	3.63749e-24
226	PC(38:2)	0.435333	0.289704	0.580962	6.49103e-09	9.16748e-09
227	PC(38:4) (b)	0.716789	0.575188	0.85839	5.3049e-22	1.07121e-21
228	PC(38:5) (a)	1.0184	0.887833	1.14897	1.59799e-46	5.37307e-46
229	PC(38:5) (b)	1.03039	0.901292	1.15948	2.25482e-48	7.79615e-48
230	PC(38:6) (a)	0.461574	0.314403	0.608745	1.1832e-09	1.7208e-09
231	PC(38:7)(c)	1.1337	1.0128	1.2546	3.15873e-63	1.46887e-62
232	PC(39:5)(a)	1.28459	1.17449	1.39468	2.04454e-89	1.61145e-88
233	PC(39:5)(b)	1.41792	1.31369	1.52215	2.00885e-112	2.83171e-111
234	PC(40:10)	-0.00101001	-0.150686	0.148666	0.989435	0.989435
235	PC(40:7) (a)	0.80459	0.6664	0.942781	4.2313e-28	9.75329e-28
236	PC(40:8)	0.495721	0.350911	0.640532	3.48743e-11	5.31453e-11
237	PC(44:12)	0.81443	0.680848	0.948013	1.89111e-30	4.55981e-30
238	PC(O-16:0/16:0)	0.40383	0.255495	0.552164	1.19049e-07	1.61001e-07
239	PC(O-16:0/20:3)	0.982781	0.85055	1.11501	7.37149e-43	2.29928e-42
240	PC(O-16:0/20:4)	0.813107	0.675221	0.950992	9.88502e-29	2.31493e-28
241	PC(O-16:0/22:6)	0.823917	0.691015	0.956819	2.39646e-31	5.93448e-31
242	PC(O-18:0/18:1)	0.872173	0.736828	1.00752	1.58666e-33	4.09516e-33
243	PC(O-18:0/18:2)	0.549062	0.403792	0.694333	3.04946e-13	4.93434e-13
244	PC(O-18:0/20:4)	1.2618	1.1449	1.3787	3.17061e-79	2.02092e-78
245	PC(O-18:0/22:6)	1.1899	1.07485	1.30495	4.76105e-74	2.74791e-73
246	PC(O-18:1/18:1)	0.0598468	-0.0908525	0.210546	0.435889	0.452559
247	PC(O-18:1/18:2)	-0.818578	-0.954699	-0.682456	9.93381e-30	2.37182e-29
248	PC(O-32:1)	1.22604	1.10802	1.34406	1.42562e-74	8.29347e-74
249	PC(O-32:2)	0.923972	0.791283	1.05666	2.49067e-38	6.91538e-38
250	PC(O-34:1)	-0.159922	-0.309448	-0.0103956	0.0360945	0.0405165
251	PC(O-34:2)	-0.516805	-0.662138	-0.371473	6.24733e-12	9.70189e-12
252	PC(O-34:4)	0.818651	0.681075	0.956228	3.45554e-29	8.14442e-29
253	PC(O-35:4)	1.33463	1.22482	1.44444	3.81969e-95	3.4998e-94
254	PC(O-36:0)	0.33562	0.188808	0.482432	8.2799e-06	1.05368e-05
255	PC(O-36:5)	1.27087	1.15754	1.38421	4.274e-84	3.10183e-83
256	PC(O-38:5)	0.537563	0.392281	0.682846	9.07972e-13	1.4437e-12
257	PC(O-40:5)	1.06547	0.93976	1.19118	1.66385e-53	6.25435e-53
258	PC(O-40:7) (a)	0.31766	0.170576	0.464744	2.50562e-05	3.16659e-05
259	PC(O-40:7) (b)	0.503677	0.357388	0.649966	2.70831e-11	4.13581e-11
260	PC(P-15:0/20:4) (a)	-1.31195	-1.42603	-1.19787	1.9127e-87	1.4915e-86
261	PC(P-15:0/20:4) (b)	0.500025	0.356557	0.643493	1.57258e-11	2.42674e-11
262	PC(P-16:0/14:0)	0.588527	0.443696	0.733359	5.28279e-15	9.00531e-15
263	PC(P-16:0/16:0)	0.485889	0.339032	0.632746	1.47164e-10	2.20596e-10
264	PC(P-16:0/16:1)	0.853004	0.716077	0.989931	1.29988e-31	3.22988e-31
265	PC(P-16:0/18:0)	1.0733	0.946076	1.20052	4.31426e-53	1.61344e-52
266	PC(P-16:0/18:1)	0.503388	0.35731	0.649466	2.60669e-11	3.98894e-11
267	PC(P-16:0/18:2)	-0.0617039	-0.212967	0.089559	0.42352	0.441593
268	PC(P-16:0/18:3)	-0.397298	-0.544976	-0.249621	1.66269e-07	2.224e-07
269	PC(P-16:0/20:4)	0.770412	0.631818	0.909006	6.46477e-26	1.38558e-25
270	PC(P-16:0/20:5)	1.12314	1.0024	1.24389	2.14017e-62	9.80463e-62
271	PC(P-16:0/22:6)	0.664405	0.526229	0.802582	4.13236e-20	7.88807e-20
272	PC(P-17:0/20:4) (a)	1.52374	1.4294	1.61809	6.92007e-143	3.38161e-141
273	PC(P-17:0/20:4) (b)	1.41908	1.31581	1.52236	4.61535e-114	7.04803e-113
274	PC(P-18:0/18:2)	0.667894	0.525062	0.810726	3.74002e-19	6.97565e-19
275	PC(P-18:0/20:4)	1.27913	1.16518	1.39308	3.11254e-84	2.2815e-83
276	PC(P-18:0/22:5)	1.25365	1.14017	1.36714	3.76083e-82	2.52907e-81
277	PC(P-18:0/22:6)	1.09353	0.973808	1.21324	1.45318e-60	6.37834e-60
278	PC(P-18:1/18:1)	0.858735	0.722061	0.99541	4.37554e-32	1.10978e-31
279	PC(P-18:1/22:6)	0.759102	0.624026	0.894177	2.04577e-26	4.4497e-26
280	PC(P-20:0/20:4)	0.927096	0.794884	1.05931	8.57712e-39	2.39963e-38
281	PC(P-35:2)(a)	1.17498	1.0549	1.29506	9.44416e-68	4.94469e-67
282	PC(P-35:2)(b)	0.895728	0.762594	1.02886	4.00838e-36	1.08419e-35
283	PC(P-36:3)	1.10825	0.98309	1.2334	1.53176e-57	6.27251e-57
284	PC(P-38:5) (a)	1.0743	0.948386	1.20021	4.21382e-54	1.61713e-53
285	PC(P-38:5) (b)	1.25513	1.13834	1.37192	1.09628e-78	6.86814e-78
286	LPC(14:0) [sn1]	-0.121554	-0.271345	0.0282371	0.111575	0.121175
287	LPC(14:0) [sn2]	-0.133747	-0.283801	0.0163064	0.0805662	0.089342
288	LPC(15-MHDA) [sn1] [104_sn1]	1.28464	1.1723	1.39697	1.09628e-86	8.45865e-86
289	LPC(15-MHDA) [sn1] / LPC(17:0) [sn2]	1.15931	1.03947	1.27915	1.64375e-66	8.30942e-66
290	LPC(15-MHDA) [sn2]	1.33367	1.22497	1.44237	1.65885e-96	1.59992e-95
291	LPC(15:0) [sn1]	0.881974	0.74897	1.01498	3.13729e-35	8.42356e-35
292	LPC(15:0) [sn2]	0.984531	0.855362	1.1137	9.71406e-45	3.12299e-44
293	LPC(16:0) [sn1]	-0.12274	-0.272229	0.0267479	0.107418	0.117169
294	LPC(16:0) [sn2]	-0.111208	-0.260216	0.0377991	0.143313	0.154256
295	LPC(16:1) [sn1]	0.636721	0.494634	0.778808	8.78286e-18	1.59352e-17
296	LPC(16:1) [sn2]	0.554118	0.410125	0.698112	1.16996e-13	1.92282e-13
297	LPC(17:0) [sn1]	0.833214	0.698529	0.967898	3.12033e-31	7.6495e-31
298	LPC(17:1) (a) [sn1] [104_sn1]	1.08439	0.959175	1.2096	1.84441e-55	7.26856e-55
299	LPC(17:1) [sn1] (a) / LPC(17:1) [sn2] (b)	1.14589	1.02393	1.26785	1.98127e-63	9.43035e-63
300	LPC(17:1) [sn1] (b)	1.42953	1.32655	1.53252	9.64841e-116	1.60734e-114
301	LPC(17:1) [sn2] (a)	1.13863	1.01568	1.26158	6.03412e-62	2.73025e-61
302	LPC(18:0) [sn1]	0.196378	0.0482327	0.344524	0.00944	0.0107949
303	LPC(18:0) [sn2]	0.212135	0.0642748	0.359994	0.00497955	0.00575711
304	LPC(18:1) [sn1]	0.0508448	-0.0978993	0.199589	0.502418	0.517964
305	LPC(18:1) [sn2]	-0.0491035	-0.19818	0.0999734	0.518097	0.53263
306	LPC(18:2) [sn1]	-0.234086	-0.382523	-0.0856491	0.00203341	0.00238479
307	LPC(18:2) [sn2]	-0.235631	-0.383661	-0.0876004	0.00184553	0.00217139
308	LPC(18:3) (a) [sn1] [104_sn1]	-0.434661	-0.578841	-0.290482	4.86142e-09	6.93272e-09
309	LPC(18:3) [sn1] (a)/LPC(18:3) [sn2] (b)	-0.432718	-0.576331	-0.289106	4.95231e-09	7.04863e-09
310	LPC(18:3) [sn1] (b)	-0.367783	-0.512268	-0.223297	7.18639e-07	9.373e-07
311	LPC(18:3) [sn2] (a)	-0.404834	-0.549675	-0.259994	5.52317e-08	7.56726e-08
312	LPC(19:0) (a) [sn1] [104_sn1]	1.17616	1.05668	1.29563	2.0299e-68	1.09406e-67
313	LPC(19:0) [sn1] (a) / LPC(19:0) [sn2] (b)	0.616027	0.474324	0.757731	7.2204e-17	1.27839e-16
314	LPC(19:0) [sn1] (b)	0.250885	0.102032	0.399738	0.000980483	0.00116671
315	LPC(19:0) [sn2] (a)	1.25552	1.14043	1.37061	1.46586e-80	9.67997e-80
316	LPC(19:1) (a)	1.03412	0.906769	1.16147	8.47657e-50	2.98718e-49
317	LPC(19:1) (b)	1.15223	1.03135	1.27311	6.14759e-65	3.00412e-64
318	LPC(19:1) (c)	1.22892	1.11445	1.34339	1.46543e-78	9.10307e-78
319	LPC(20:0) [sn1]	-0.635954	-0.778364	-0.493543	1.12495e-17	2.03101e-17
320	LPC(20:0) [sn2]	-0.517141	-0.661821	-0.372462	4.90293e-12	7.64649e-12
321	LPC(20:1) [sn1]	-0.289492	-0.437747	-0.141237	0.000136645	0.000166381
322	LPC(20:1) [sn2]	-0.308237	-0.455516	-0.160958	4.40281e-05	5.47922e-05
323	LPC(20:2) [sn1]	-0.00877242	-0.157924	0.14038	0.908115	0.913098
324	LPC(20:2) [sn2]	-0.00976825	-0.159017	0.139481	0.897806	0.905215
325	LPC(20:3) [sn1]	0.772996	0.635516	0.910477	1.94154e-26	4.24821e-26
326	LPC(20:3) [sn2]	0.77144	0.633804	0.909075	2.71029e-26	5.84306e-26
327	LPC(20:4) [sn1]	0.723922	0.584737	0.863106	4.52606e-23	9.31911e-23
328	LPC(20:4) [sn2]	0.794804	0.657509	0.932098	8.05781e-28	1.83999e-27
329	LPC(20:5) [sn1]	0.990991	0.861853	1.12013	2.94191e-45	9.62688e-45
330	LPC(20:5) [sn2]	0.994353	0.866167	1.12254	4.2946e-46	1.42441e-45
331	LPC(22:0) [sn1]	-1.08761	-1.21376	-0.961464	4.75091e-55	1.86225e-54
332	LPC(22:0) [sn2]	-1.07392	-1.20026	-0.947577	9.20734e-54	3.51509e-53
333	LPC(22:1) [sn1]	0.561335	0.417743	0.704926	4.93124e-14	8.14098e-14
334	LPC(22:1) [sn2]	0.531466	0.387834	0.675098	9.07117e-13	1.4437e-12
335	LPC(22:4) [sn1]	0.361895	0.21519	0.508601	1.54467e-06	2.00397e-06
336	LPC(22:4) [sn2]	0.357535	0.210831	0.504238	2.05084e-06	2.65594e-06
337	LPC(22:5) (n3) [sn1] [104_sn1]	1.1494	1.027	1.2718	2.23902e-63	1.05884e-62
338	LPC(22:5) [sn1] (n3)/LPC(22:5) [sn2] (n6)	1.09459	0.969193	1.21998	3.39858e-56	1.36877e-55
339	LPC(22:5) [sn1] (n6)	0.355467	0.208147	0.502788	2.57882e-06	3.3221e-06
340	LPC(22:5) [sn2] (n3)	1.14361	1.02166	1.26557	3.14488e-63	1.46887e-62
341	LPC(22:6) [sn1]	0.648355	0.509371	0.787339	4.49054e-19	8.35423e-19
342	LPC(22:6) [sn2]	0.673164	0.535096	0.811231	1.32475e-20	2.54867e-20
343	LPC(24:0) [sn1]	-1.15064	-1.2748	-1.02648	5.11397e-62	2.32829e-61
344	LPC(24:0) [sn2]	-1.06112	-1.18838	-0.933855	4.65304e-52	1.70534e-51
345	LPC(26:0) [sn1]	-0.261353	-0.411481	-0.111225	0.000664877	0.000793738
346	LPC(26:0) [sn2]	-0.311229	-0.459892	-0.162566	4.37945e-05	5.45942e-05
347	LPC(O-16:0)	0.224672	0.0764284	0.372916	0.00301923	0.00351843
348	LPC(O-18:0)	0.895735	0.763412	1.02806	1.65842e-36	4.51905e-36
349	LPC(O-18:1)	-0.149571	-0.298067	-0.00107544	0.0483677	0.0539627
350	LPC(O-20:0)	0.77544	0.639111	0.91177	5.60765e-27	1.24558e-26
351	LPC(O-20:1)	0.352961	0.207381	0.498541	2.31087e-06	2.98217e-06
352	LPC(O-22:0)	0.572764	0.429026	0.716503	1.667e-14	2.77707e-14
353	LPC(O-22:1)	0.295723	0.149085	0.442361	8.21579e-05	0.000100874
354	LPC(O-24:0)	0.435613	0.288596	0.582629	8.737e-09	1.23158e-08
355	LPC(O-24:1)	0.15718	0.00803658	0.306324	0.0388948	0.0435265
356	LPC(O-24:2)	-0.657842	-0.800783	-0.5149	1.25362e-18	2.29725e-18
357	LPC(P-16:0)	0.24946	0.10131	0.39761	0.000991545	0.00117796
358	LPC(P-17:0) (a)	1.3641	1.25727	1.47093	1.92715e-102	2.27839e-101
359	LPC(P-17:0) (b)	1.20247	1.08387	1.32107	9.75604e-72	5.58686e-71
360	LPC(P-18:0)	0.995247	0.866818	1.12368	5.13462e-46	1.69535e-45
361	LPC(P-18:1)	0.401755	0.255742	0.547769	8.77179e-08	1.19512e-07
362	LPC(P-20:0)	0.84368	0.70839	0.978969	1.13903e-31	2.84953e-31
363	PE(15-MHDA_18:1)	1.04532	0.916026	1.17461	1.96132e-49	6.87871e-49
364	PE(15-MHDA_18:2)	0.985999	0.855189	1.11681	6.70662e-44	2.12812e-43
365	PE(15-MHDA_20:4)	1.34553	1.23461	1.45645	7.18439e-95	6.50143e-94
366	PE(15-MHDA_22:6)	1.37125	1.26454	1.47795	2.01931e-103	2.55199e-102
367	PE(16:0_16:0)	0.859892	0.722451	0.997334	7.53439e-32	1.89134e-31
368	PE(16:0_16:1)	0.584061	0.438239	0.729884	1.23807e-14	2.07667e-14
369	PE(16:0_18:1)	-0.793537	-0.929631	-0.657444	3.58863e-28	8.29799e-28
370	PE(16:0_18:2)	-0.95544	-1.08532	-0.825561	4.09879e-42	1.24664e-41
371	PE(16:0_18:3) (a)	-0.746506	-0.883497	-0.609515	4.96781e-25	1.05548e-24
372	PE(16:0_18:3) (b)	-0.723449	-0.862618	-0.584279	4.76107e-23	9.77552e-23
373	PE(16:0_20:3)	0.110594	-0.0396674	0.260856	0.148919	0.160055
374	PE(16:0_20:4)	-0.300555	-0.447661	-0.153449	6.63211e-05	8.19787e-05
375	PE(16:0_20:5)	0.501475	0.356644	0.646305	2.10964e-11	3.24185e-11
376	PE(16:0_22:6)	0.220411	0.0723669	0.368454	0.00357134	0.00414864
377	PE(16:1_18:2)	0.0932341	-0.0576084	0.244077	0.225381	0.239426
378	PE(16:1_20:4)	-0.132031	-0.282013	0.0179509	0.0843736	0.0932818
379	PE(17:0_18:1)	0.1245	-0.0256356	0.274636	0.103967	0.113743
380	PE(17:0_18:2)	-0.13887	-0.288228	0.0104872	0.0683573	0.075918
381	PE(17:0_20:4)	0.744292	0.604361	0.884223	5.4152e-24	1.13087e-23
382	PE(17:0_22:6)	0.93067	0.801158	1.06018	1.855e-40	5.3957e-40
383	PE(18:0_18:1)	-0.717197	-0.856438	-0.577957	1.11e-22	2.26009e-22
384	PE(18:0_18:2)	-0.546789	-0.690166	-0.403411	1.89929e-13	3.10062e-13
385	PE(18:0_20:3) (a)	0.293927	0.144995	0.442859	0.000115912	0.000141843
386	PE(18:0_20:3) (b)	1.00329	0.872423	1.13416	3.50013e-45	1.14027e-44
387	PE(18:0_20:4)	0.119619	-0.0299023	0.269141	0.116721	0.126563
388	PE(18:0_22:4)	0.70261	0.560433	0.844787	4.27183e-21	8.41733e-21
389	PE(18:0_22:5) (n3)	1.12114	0.995004	1.24728	6.70184e-58	2.79117e-57
390	PE(18:0_22:5) (n6)	0.400593	0.253024	0.548163	1.29182e-07	1.73743e-07
391	PE(18:0_22:6)	0.561634	0.419888	0.70338	2.30742e-14	3.82656e-14
392	PE(18:1_18:1)	-0.944487	-1.07523	-0.813745	7.95405e-41	2.36045e-40
393	PE(18:1_18:2)	-0.868147	-1.00195	-0.734349	6.2957e-34	1.64226e-33
394	PE(18:1_22:6) (a)	-0.00200269	-0.151793	0.147788	0.979069	0.980406
395	PE(18:1_22:6) (b)	1.09206	0.968498	1.21563	2.33185e-57	9.44336e-57
396	PE(20:0_20:4)	-0.528206	-0.674103	-0.38231	2.65941e-12	4.18314e-12
397	PE(36:0)	-0.423216	-0.571043	-0.275388	2.65196e-08	3.65393e-08
398	PE(38:5) (a)	0.321776	0.172884	0.470669	2.47556e-05	3.134e-05
399	PE(38:5) (b)	0.598536	0.454609	0.742464	1.28724e-15	2.2359e-15
400	PE(O-16:0/18:2)	0.292266	0.14376	0.440772	0.000121081	0.000147921
401	PE(O-16:0/20:3)	1.3475	1.23419	1.46081	4.72188e-92	3.97832e-91
402	PE(O-16:0/20:4)	0.973873	0.841091	1.10666	6.72679e-42	2.02911e-41
403	PE(O-16:0/22:4)	0.869694	0.731371	1.00802	4.00526e-32	1.01939e-31
404	PE(O-16:0/22:6)	0.981966	0.853204	1.11073	8.82763e-45	2.85051e-44
405	PE(O-18:0/20:4)	1.44554	1.34106	1.55003	3.46051e-115	5.63679e-114
406	PE(O-18:0/22:5)	1.6303	1.54185	1.71874	9.51221e-170	3.48623e-167
407	PE(O-18:0/22:6)	1.45894	1.35955	1.55834	2.68281e-125	5.95909e-124
408	PE(O-18:1/18:2)	0.455589	0.311044	0.600133	9.83684e-10	1.43634e-09
409	PE(O-18:1/22:6)	1.10546	0.98469	1.22623	8.94627e-61	3.95037e-60
410	PE(O-34:1)	0.977385	0.84597	1.1088	6.57137e-43	2.05847e-42
411	PE(O-36:5)	1.1813	1.06173	1.30087	8.20383e-69	4.52136e-68
412	PE(O-38:5) (a)	1.47037	1.36634	1.57441	9.01642e-119	1.69462e-117
413	PE(O-38:5) (b)	1.4425	1.33717	1.54784	1.65064e-113	2.46922e-112
414	PE(P-15:0/20:4) (a)	-1.25806	-1.37534	-1.14079	1.83218e-78	1.12856e-77
415	PE(P-15:0/20:4) (b)	-0.281904	-0.431785	-0.132023	0.000237755	0.000287582
416	PE(P-15:0/22:6) (a)	-1.38065	-1.49081	-1.27049	1.22833e-99	1.30488e-98
417	PE(P-15:0/22:6) (b)	0.541047	0.39892	0.683175	2.08966e-13	3.40382e-13
418	PE(P-16:0/18:1)	0.0598037	-0.0903454	0.209953	0.434541	0.451799
419	PE(P-16:0/18:2)	-0.376661	-0.524428	-0.228894	6.93869e-07	9.06606e-07
420	PE(P-16:0/18:3)	-0.301882	-0.450159	-0.153605	7.03162e-05	8.66248e-05
421	PE(P-16:0/20:3) (a)	1.12721	1.00187	1.25255	4.92172e-59	2.09746e-58
422	PE(P-16:0/20:3) (b)	1.19606	1.07417	1.31795	4.60927e-68	2.43064e-67
423	PE(P-16:0/20:4)	0.925501	0.793582	1.05742	7.95239e-39	2.23337e-38
424	PE(P-16:0/20:5)	1.26721	1.15473	1.3797	1.06422e-84	7.87956e-84
425	PE(P-16:0/22:4)	-0.0331126	-0.18252	0.116294	0.663647	0.675629
426	PE(P-16:0/22:5) (n3)	1.44041	1.33447	1.54634	2.42943e-112	3.35994e-111
427	PE(P-16:0/22:5) (n6)	0.437372	0.289595	0.58515	9.07303e-09	1.27424e-08
428	PE(P-16:0/22:6)	0.7697	0.63509	0.90431	3.15859e-27	7.08027e-27
429	PE(P-17:0/20:4) (a)	1.53988	1.44691	1.63284	8.39498e-148	5.12793e-146
430	PE(P-17:0/20:4) (b)	1.47634	1.37689	1.57578	2.58127e-127	6.30691e-126
431	PE(P-17:0/22:6) (a)	1.47896	1.384	1.57392	4.96637e-136	1.6547e-134
432	PE(P-17:0/22:6) (b)	1.33006	1.22396	1.43615	1.12671e-99	1.21453e-98
433	PE(P-18:0/18:1)	1.01246	0.881584	1.14335	7.03985e-46	2.31399e-45
434	PE(P-18:0/18:2)	0.435658	0.287466	0.583851	1.13349e-08	1.57956e-08
435	PE(P-18:0/18:3)	0.712581	0.57133	0.853832	7.17081e-22	1.44401e-21
436	PE(P-18:0/20:3) (a)	1.29874	1.18373	1.41375	5.17378e-85	3.90967e-84
437	PE(P-18:0/20:3) (b)	1.42794	1.32348	1.5324	3.28261e-113	4.8123e-112
438	PE(P-18:0/20:4)	1.43156	1.32948	1.53365	1.90598e-117	3.40752e-116
439	PE(P-18:0/20:5)	1.47365	1.37647	1.57082	3.99862e-131	1.08555e-129
440	PE(P-18:0/22:4)	0.66094	0.519636	0.802243	3.65612e-19	6.83657e-19
441	PE(P-18:0/22:5) (n3)	1.6155	1.5267	1.70431	6.20781e-167	1.13758e-164
442	PE(P-18:0/22:5) (n6)	1.21296	1.09058	1.33534	3.58651e-69	1.9916e-68
443	PE(P-18:0/22:6)	1.28385	1.17578	1.39193	6.83261e-92	5.69125e-91
444	PE(P-18:1/18:1)	0.972642	0.841308	1.10398	1.3406e-42	4.12881e-42
445	PE(P-18:1/18:1) (a)	0.819273	0.682372	0.956175	1.77072e-29	4.20046e-29
446	PE(P-18:1/18:1) (b)	1.48656	1.38441	1.5887	8.27421e-124	1.68472e-122
447	PE(P-18:1/18:2) (a)	-0.19705	-0.345442	-0.0486574	0.00931644	0.0106702
448	PE(P-18:1/18:2) (b)	1.24429	1.12512	1.36345	3.50982e-75	2.07476e-74
449	PE(P-18:1/18:3)	0.306779	0.158309	0.455248	5.48677e-05	6.80508e-05
450	PE(P-18:1/20:3) (a)	1.28584	1.16953	1.40216	3.01599e-82	2.04696e-81
451	PE(P-18:1/20:3) (b)	1.53085	1.43325	1.62845	2.40029e-137	8.79706e-136
452	PE(P-18:1/20:4) (a)	1.2033	1.08428	1.32232	2.07546e-71	1.17931e-70
453	PE(P-18:1/20:4) (b)	1.58883	1.49863	1.67903	3.40693e-160	4.99456e-158
454	PE(P-18:1/20:5) (a)	1.32593	1.21717	1.4347	1.40773e-95	1.30616e-94
455	PE(P-18:1/20:5) (b)	1.49972	1.40405	1.59539	3.10558e-137	1.08399e-135
456	PE(P-18:1/22:4)	0.760366	0.619379	0.901352	1.39715e-24	2.95133e-24
457	PE(P-18:1/22:5) (a)	1.58798	1.49684	1.67911	5.83225e-158	6.1072e-156
458	PE(P-18:1/22:5) (b)	1.09104	0.962375	1.21971	1.52134e-53	5.74814e-53
459	PE(P-18:1/22:6) (a)	0.897702	0.767935	1.02747	6.72781e-38	1.85394e-37
460	PE(P-18:1/22:6) (b)	1.49181	1.39681	1.58681	1.46192e-137	5.63994e-136
461	PE(P-19:0/20:4) (a)	1.56309	1.47186	1.65432	1.55914e-154	1.42856e-152
462	PE(P-19:0/20:4) (b)	1.27557	1.16245	1.38869	7.96931e-85	5.96072e-84
463	PE(P-20:0/18:1)	-0.466157	-0.611885	-0.320429	5.61616e-10	8.24979e-10
464	PE(P-20:0/18:2)	-0.815991	-0.952084	-0.679897	1.41281e-29	3.36231e-29
465	PE(P-20:0/20:4)	0.580432	0.437063	0.7238	6.58342e-15	1.11705e-14
466	PE(P-20:0/22:6)	0.533257	0.390875	0.675639	4.89695e-13	7.88893e-13
467	PE(P-20:1/20:4)	0.318221	0.16985	0.466593	2.84643e-05	3.59111e-05
468	PE(P-20:1/22:6)	0.616589	0.476567	0.756611	3.00025e-17	5.35081e-17
469	LPE(16:0) [sn1]	0.466266	0.319217	0.613315	7.85348e-10	1.15132e-09
470	LPE(16:0) [sn2]	0.498209	0.351467	0.644951	4.98215e-11	7.5609e-11
471	LPE(17:0) [sn1]	0.433736	0.286549	0.580923	1.04789e-08	1.46585e-08
472	LPE(17:0) [sn2]	0.758601	0.619586	0.897615	4.30814e-25	9.17984e-25
473	LPE(18:0) [sn1]	0.179717	0.0301419	0.329291	0.0185895	0.0210931
474	LPE(18:0) [sn2]	0.250088	0.101306	0.398869	0.00101178	0.00120006
475	LPE(18:1) [sn1]	-0.686672	-0.8265	-0.546844	7.2638e-21	1.41983e-20
476	LPE(18:1) [sn2]	-0.692916	-0.832488	-0.553345	2.88401e-21	5.72895e-21
477	LPE(18:2) [sn1]	-0.439406	-0.584682	-0.294131	4.33992e-09	6.20135e-09
478	LPE(18:2) [sn2]	-0.474684	-0.61933	-0.330039	2.0503e-10	3.04842e-10
479	LPE(20:4) [sn1]	0.574295	0.430069	0.718521	1.73745e-14	2.88788e-14
480	LPE(20:4) [sn2]	0.581723	0.437361	0.726085	8.68525e-15	1.47027e-14
481	LPE(22:6) [sn1]	0.679939	0.54163	0.818248	6.63854e-21	1.30108e-20
482	LPE(22:6) [sn2]	0.735386	0.597834	0.872938	3.29789e-24	6.92651e-24
483	LPE(P-16:0)	0.274487	0.127263	0.421711	0.000269217	0.0003251
484	LPE(P-18:0)	0.848724	0.715117	0.982332	1.05666e-32	2.69872e-32
485	LPE(P-18:1)	0.541356	0.399097	0.683615	2.12954e-13	3.46109e-13
486	LPE(P-20:0)	0.350794	0.202974	0.498615	3.74001e-06	4.78435e-06
487	PI (38:5) (b)	0.91772	0.784656	1.05078	1.06072e-37	2.91201e-37
488	PI(15-MHDA_20:4)\PI(17:0_20:4)	0.874951	0.741742	1.00816	1.18339e-34	3.14285e-34
489	PI(16:0_16:1)	0.852248	0.714578	0.989918	2.87137e-31	7.08657e-31
490	PI(16:0_20:3) (a)	-0.289453	-0.436966	-0.14194	0.000126772	0.000154615
491	PI(16:0_20:3) (b)	0.661343	0.518051	0.804635	1.01164e-18	1.86784e-18
492	PI(16:0_20:4)	-0.188692	-0.338033	-0.039351	0.0133379	0.0151576
493	PI(16:0/16:0)	0.679424	0.537108	0.821741	7.35339e-20	1.39277e-19
494	PI(17:0_18:1)	0.975541	0.845104	1.10598	2.55277e-43	8.06545e-43
495	PI(17:0_18:2)	0.0516053	-0.0978915	0.201102	0.49822	0.51436
496	PI(18:0_18:1)	0.0710293	-0.0796233	0.221682	0.35499	0.372257
497	PI(18:0_20:2)	-0.265912	-0.414792	-0.117032	0.000480503	0.000575505
498	PI(18:0_20:3) (a)	-0.0599873	-0.210477	0.0905028	0.434175	0.451799
499	PI(18:0_20:3) (b)	1.25297	1.13373	1.37221	6.10977e-76	3.67087e-75
500	PI(18:0_20:4)	0.172606	0.0232986	0.321912	0.02352	0.0265642
501	PI(18:0_22:4)	1.05592	0.92658	1.18527	3.02292e-50	1.07043e-49
502	PI(18:0_22:5) (n3)	1.35437	1.24485	1.46389	1.17021e-97	1.17502e-96
503	PI(18:0_22:5) (n6)	0.415728	0.268469	0.562988	4.08497e-08	5.60727e-08
504	PI(18:0_22:6)	0.538892	0.397691	0.680092	1.82479e-13	2.98566e-13
505	PI(18:1_18:2)	-1.24024	-1.35598	-1.1245	2.49823e-78	1.526e-77
506	PI(20:0_20:4)	-1.15503	-1.27699	-1.03307	2.96088e-64	1.42785e-63
507	PI(34:0)	0.793379	0.6544	0.932358	3.77971e-27	8.44673e-27
508	PI(34:1)	-0.285738	-0.433953	-0.137524	0.00016577	0.000201508
509	PI(36:2)	-1.11678	-1.24209	-0.991479	3.66047e-58	1.54203e-57
510	PI(37:6)	0.573563	0.430009	0.717117	1.42807e-14	2.3899e-14
511	PI(38:5) (a)	-0.383443	-0.529147	-0.237739	3.03333e-07	4.00618e-07
512	PI(38:6)	0.056407	-0.0924262	0.20524	0.457124	0.473934
513	PI(39:6)	0.945449	0.818514	1.07238	5.13002e-43	1.61387e-42
514	PIP1(38:4)	-0.255906	-0.404941	-0.10687	0.00078655	0.000937465
515	LPI(18:0) [sn1]	0.125237	-0.0246559	0.275131	0.101386	0.111085
516	LPI(18:0) [sn2]	0.0461805	-0.104505	0.196866	0.547618	0.560621
517	LPI(18:1) [sn1]	0.086168	-0.0644141	0.23675	0.261661	0.276764
518	LPI(18:1) [sn2]	0.0698993	-0.0807175	0.220516	0.362578	0.37913
519	LPI(18:2) [sn1]	-0.788695	-0.92567	-0.65172	1.46745e-27	3.3405e-27
520	LPI(18:2) [sn2]	-0.829365	-0.965761	-0.692968	2.61988e-30	6.27573e-30
521	LPI(20:4) [sn1]	0.468744	0.32317	0.614318	4.35199e-10	6.43147e-10
522	LPI(20:4) [sn2]	0.47707	0.33243	0.62171	1.6709e-10	2.49443e-10
523	PS(36:1)	-0.421167	-0.56793	-0.274404	2.46156e-08	3.39798e-08
524	PS(36:2)	-0.422105	-0.568684	-0.275525	2.2062e-08	3.05699e-08
525	PS(38:3)	-0.188791	-0.337273	-0.0403097	0.0127675	0.014532
526	PS(38:4)	-0.200319	-0.349317	-0.05132	0.00847696	0.00975449
527	PS(38:5)	0.128401	-0.0199847	0.276787	0.0897888	0.0989703
528	PS(40:5)	0.302095	0.154409	0.449782	6.50367e-05	8.05269e-05
529	PS(40:6)	0.128129	-0.0212801	0.277537	0.0926949	0.10202
530	PG(34:1)	0.117932	-0.0315726	0.267437	0.121919	0.131809
531	PG(36:1)	0.453993	0.308569	0.599417	1.40308e-09	2.02851e-09
532	PG(36:2)	-0.480846	-0.626386	-0.335307	1.55978e-10	2.33331e-10
533	CE(14:0)	0.544102	0.397896	0.690308	6.78527e-13	1.08832e-12
534	CE(15:0)	0.871074	0.736194	1.00595	1.18382e-33	3.06621e-33
535	CE(16:0)	1.01687	0.888327	1.14542	1.19956e-47	4.08965e-47
536	CE(16:1)	0.973669	0.842657	1.10468	7.44137e-43	2.31124e-42
537	CE(16:2)	0.385335	0.237104	0.533565	4.19478e-07	5.51035e-07
538	CE(17:0)	1.4626	1.36277	1.56243	5.67124e-125	1.22265e-123
539	CE(17:1)	1.09595	0.970071	1.22183	5.96376e-56	2.38876e-55
540	CE(18:0)	1.01056	0.883649	1.13747	3.51617e-48	1.21002e-47
541	CE(18:1)	0.234317	0.0848926	0.383742	0.00215464	0.00252292
542	CE(18:2)	-0.537854	-0.683343	-0.392365	9.48876e-13	1.50547e-12
543	CE(18:3)	-0.679198	-0.820228	-0.538167	3.63675e-20	6.96015e-20
544	CE(20:0)	0.686528	0.546689	0.826366	7.44071e-21	1.45054e-20
545	CE(20:1)	0.2665	0.118681	0.41432	0.000425158	0.000510051
546	CE(20:2)	0.24081	0.0918817	0.389739	0.00156168	0.00184333
547	CE(20:3)	0.30148	0.152389	0.450572	7.86397e-05	9.67162e-05
548	CE(20:4)	0.429854	0.283785	0.575923	1.09602e-08	1.53025e-08
549	CE(20:5)	0.83205	0.696603	0.967497	7.48823e-31	1.81151e-30
550	CE(22:0)	-0.390301	-0.537563	-0.243038	2.50705e-07	3.3291e-07
551	CE(22:1)	0.453281	0.308963	0.597599	1.12141e-09	1.63418e-09
552	CE(22:4)	-0.239943	-0.388636	-0.0912505	0.00159608	0.00188091
553	CE(22:5) (n3)	0.446004	0.302318	0.58969	1.73014e-09	2.48665e-09
554	CE(22:5) (n6)	0.505615	0.360325	0.650905	1.68255e-11	2.59098e-11
555	CE(22:6)	0.448432	0.304671	0.592193	1.44624e-09	2.0868e-09
556	CE(24:0)	-0.431469	-0.578367	-0.284571	1.16709e-08	1.62329e-08
557	CE(24:1)	0.299907	0.152783	0.447031	6.8884e-05	8.50033e-05
558	CE(24:4)	-0.172756	-0.321025	-0.0244861	0.0224509	0.0253958
559	CE(24:5)	0.393011	0.248407	0.537614	1.24878e-07	1.68573e-07
560	CE(24:6)	0.0131052	-0.137775	0.163986	0.86466	0.874201
561	COH	0.686055	0.545518	0.826592	1.19474e-20	2.3046e-20
562	DE(16:0)	0.160612	0.00988271	0.311341	0.0367864	0.04123
563	DE(18:1)	0.441724	0.294445	0.589003	5.80043e-09	8.23976e-09
564	DE(18:2)	0.00598098	-0.143322	0.155284	0.937343	0.941195
565	DE(20:4)	0.620965	0.478932	0.762998	4.91583e-17	8.74589e-17
566	DE(20:5)	0.939139	0.808558	1.06972	1.62231e-40	4.75661e-40
567	DE(22:6)	0.910136	0.779884	1.04039	1.47409e-38	4.10839e-38
568	FA(14:0)	0.543468	0.39985	0.687087	2.86376e-13	4.6441e-13
569	FA(15:0)	0.586956	0.443844	0.730068	3.02113e-15	5.21056e-15
570	FA(16:0)	0.444452	0.299986	0.588918	2.38496e-09	3.42109e-09
571	FA(16:1)	0.955084	0.824749	1.08542	7.77516e-42	2.33573e-41
572	FA(16:2)	0.215337	0.0649806	0.365693	0.00505609	0.0058364
573	FA(17:0)	1.03205	0.904389	1.15971	1.99526e-49	6.96441e-49
574	FA(17:1)	1.06049	0.934161	1.18683	1.19234e-52	4.41405e-52
575	FA(18:0)	0.776612	0.638348	0.914876	2.16358e-26	4.69203e-26
576	FA(18:1)	0.147795	-0.000554442	0.296145	0.0508603	0.0566575
577	FA(18:2)	-0.531407	-0.675551	-0.387263	1.09037e-12	1.72251e-12
578	FA(18:3)	-0.382233	-0.528007	-0.23646	3.34186e-07	4.40572e-07
579	FA(20:2)	0.601546	0.459812	0.74328	3.52948e-16	6.2041e-16
580	FA(20:3)	1.02229	0.8948	1.14977	9.3835e-49	3.25977e-48
581	FA(20:4)	0.87084	0.737856	1.00382	1.79424e-34	4.74793e-34
582	FA(20:5)	0.869842	0.735518	1.00417	8.22069e-34	2.1368e-33
583	FA(22:4)	0.842844	0.708414	0.977274	5.73845e-32	1.45044e-31
584	FA(22:5)	1.06553	0.940783	1.19028	3.36625e-54	1.29866e-53
585	FA(22:6)	0.717854	0.581965	0.853744	1.0466e-23	2.1671e-23
586	AC(12:0)	0.623485	0.480822	0.766149	5.04412e-17	8.95239e-17
587	AC(13:0)	0.711849	0.572865	0.850833	1.85415e-22	3.76479e-22
588	AC(14:0)	0.920995	0.788152	1.05384	4.83965e-38	1.33866e-37
589	AC(14:1)	0.702875	0.561894	0.843855	2.006e-21	3.99564e-21
590	AC(14:2)	0.0399248	-0.110135	0.189984	0.601629	0.614198
591	AC(15:0) (a)	1.4662	1.36706	1.56535	1.27546e-126	3.01584e-125
592	AC(15:0) (b)	1.35282	1.24435	1.4613	6.66428e-99	6.97846e-98
593	AC(16:0)	0.694129	0.553854	0.834404	3.81678e-21	7.56134e-21
594	AC(16:1)	0.924667	0.792953	1.05638	7.19677e-39	2.02894e-38
595	AC(17:0) (a)	1.47284	1.37267	1.57301	1.3387e-125	3.06647e-124
596	AC(17:0) (b)	1.39016	1.28154	1.49877	8.42861e-103	1.01282e-101
597	AC(18:0)	1.13225	1.00898	1.25552	4.02164e-61	1.79748e-60
598	AC(18:1)	0.0366697	-0.113013	0.186353	0.630725	0.643006
599	AC(18:2)	-0.509504	-0.654883	-0.364125	1.22275e-11	1.89087e-11
600	DG(14:0_16:0)	0.795198	0.655639	0.934757	4.63723e-27	1.03316e-26
601	DG(14:0_18:2)	-0.11611	-0.266579	0.0343597	0.130242	0.140393
602	DG(16:0_16:0)	0.712057	0.570371	0.853743	1.00224e-21	2.01272e-21
603	DG(16:0_16:1)	0.946824	0.813107	1.08054	1.90143e-39	5.44433e-39
604	DG(16:0_18:1)	0.470335	0.323855	0.616815	4.85412e-10	7.1591e-10
605	DG(16:0_18:2)	-0.226112	-0.376111	-0.0761127	0.00317842	0.00369806
606	DG(16:0_20:4)	1.13914	1.01698	1.26129	1.16998e-62	5.39368e-62
607	DG(16:0_22:5)	1.16817	1.04721	1.28914	2.50789e-66	1.2591e-65
608	DG(16:0_22:6)	0.852667	0.721305	0.984028	5.9743e-34	1.56399e-33
609	DG(16:1_18:1)	0.75724	0.617562	0.896919	8.32888e-25	1.76447e-24
610	DG(18:0_18:1)	0.387341	0.238933	0.535749	3.77742e-07	4.97101e-07
611	DG(18:0_18:2)	0.194928	0.04421	0.345645	0.0113152	0.012899
612	DG(18:0_20:4)	0.603572	0.462242	0.744903	2.35627e-16	4.15179e-16
613	DG(18:0_22:6)	-0.00286229	-0.152977	0.147252	0.970153	0.972807
614	DG(18:1_18:1)	-0.27202	-0.422067	-0.121973	0.000395014	0.000474664
615	DG(18:1_18:2)	-0.828449	-0.967161	-0.689738	2.24245e-29	5.30231e-29
616	DG(18:1_18:3)	-0.854416	-0.991469	-0.717363	1.18381e-31	2.95147e-31
617	DG(18:1_20:3)	0.576397	0.432623	0.720171	1.17204e-14	1.97043e-14
618	DG(18:1_20:4)	-0.0148869	-0.164809	0.135036	0.845507	0.857201
619	DG(18:1_20:5)	0.413788	0.268382	0.559194	3.19685e-08	4.39641e-08
620	DG(18:1_22:5)	0.798655	0.662275	0.935035	2.19419e-28	5.08968e-28
621	DG(18:1_22:6)	0.480043	0.337835	0.622252	6.37386e-11	9.63308e-11
622	DG(18:2_18:2)	-0.957697	-1.09115	-0.824243	2.30343e-40	6.67359e-40
623	DG(18:2_20:4)	-0.489153	-0.635635	-0.342672	1.00408e-10	1.51438e-10
624	DG(18:2_22:6)	0.213706	0.0668997	0.360512	0.00438225	0.00507455
625	TG(48:0) [NL-16:0]	0.802067	0.662429	0.941705	1.92184e-27	4.36133e-27
626	TG(48:0) [NL-18:0]	1.26282	1.14434	1.3813	1.15241e-77	6.98114e-77
627	TG(48:1) [NL-16:1]	1.38704	1.27726	1.49683	7.68621e-101	8.53635e-100
628	TG(48:1) [NL-18:1]	0.813311	0.675511	0.951111	8.93751e-29	2.09974e-28
629	TG(48:2) [NL-14:0]	0.649832	0.507082	0.792583	2.81486e-18	5.11984e-18
630	TG(48:2) [NL-14:1]	1.36605	1.25493	1.47716	8.41315e-97	8.22245e-96
631	TG(48:2) [NL-16:1]	1.35509	1.24429	1.4659	4.87659e-96	4.64226e-95
632	TG(48:2) [NL-18:2]	0.334221	0.18614	0.482303	1.07321e-05	1.36337e-05
633	TG(48:3) [NL-14:0]	0.538714	0.393562	0.683866	7.7871e-13	1.24356e-12
634	TG(48:3) [NL-16:1]	0.940306	0.806708	1.0739	4.84142e-39	1.37549e-38
635	TG(48:3) [NL-18:3]	0.283215	0.134309	0.432121	0.000202383	0.000245607
636	TG(49:1) [NL-16:1]	1.04695	0.918749	1.17516	2.84484e-50	1.01227e-49
637	TG(49:1) [NL-17:1]	1.39667	1.28803	1.5053	1.72048e-103	2.21248e-102
638	TG(50:0) [NL-18:0]	1.18256	1.05983	1.30529	4.36701e-66	2.17757e-65
639	TG(50:1) [NL-14:0]	1.00105	0.870179	1.13192	5.20464e-45	1.68806e-44
640	TG(50:1) [NL-16:0]	0.735712	0.595567	0.875857	1.89787e-23	3.91869e-23
641	TG(50:1) [NL-18:1]	1.06446	0.935947	1.19297	1.74162e-51	6.31983e-51
642	TG(50:2) [NL-14:0]	-0.105161	-0.254286	0.0439635	0.166667	0.178086
643	TG(50:2) [NL-16:1]	1.36616	1.25589	1.47642	6.08675e-98	6.28392e-97
644	TG(50:2) [NL-18:1]	0.637961	0.494609	0.781312	1.43412e-17	2.5765e-17
645	TG(50:2) [NL-18:2]	0.524572	0.378712	0.670431	3.66213e-12	5.73578e-12
646	TG(50:3) [NL-14:0]	-0.584465	-0.728053	-0.440876	4.77393e-15	8.1759e-15
647	TG(50:3) [NL-14:1]	0.890342	0.756259	1.02442	2.59139e-35	6.98341e-35
648	TG(50:3) [NL-16:1]	1.13209	1.00854	1.25564	7.0423e-61	3.12849e-60
649	TG(50:3) [NL-18:2]	0.0739795	-0.0765625	0.224521	0.335017	0.352827
650	TG(50:3) [NL-18:3]	0.640515	0.497114	0.783915	1.10775e-17	2.00489e-17
651	TG(50:4) [NL-14:0]	-0.658086	-0.799619	-0.516552	5.77046e-19	1.06812e-18
652	TG(50:4) [NL-18:3]	-0.0198286	-0.170417	0.13076	0.796109	0.809359
653	TG(50:4) [NL-20:4]	0.973181	0.841333	1.10503	2.34997e-42	7.20723e-42
654	TG(51:0) [NL-16:0]	1.28196	1.16608	1.39783	2.39294e-82	1.65474e-81
655	TG(51:1) [NL-17:0]	1.38777	1.27961	1.49593	3.45469e-103	4.22048e-102
656	TG(51:2) [NL-15:0]	1.08214	0.956054	1.20823	1.23924e-54	4.83173e-54
657	TG(51:2) [NL-17:0]	1.44441	1.34058	1.54823	4.13509e-116	7.04888e-115
658	TG(51:2) [NL-17:1]	1.44477	1.34097	1.54857	3.38384e-116	5.9056e-115
659	TG(52:1) [NL-18:0]	1.14585	1.02365	1.26804	3.16619e-63	1.46887e-62
660	TG(52:1) [NL-18:1]	1.17742	1.05668	1.29816	2.2139e-67	1.13482e-66
661	TG(52:2) [NL-16:0]	-0.17884	-0.329214	-0.0284655	0.0198164	0.0224504
662	TG(52:2) [NL-18:2]	1.06491	0.938185	1.19164	9.64668e-53	3.58935e-52
663	TG(52:3) [NL-16:1]	0.795901	0.656942	0.934859	2.62837e-27	5.92798e-27
664	TG(52:3) [NL-18:2]	-0.524126	-0.669323	-0.37893	3.06527e-12	4.81123e-12
665	TG(52:4) [NL-16:1]	0.106582	-0.0439087	0.257072	0.164849	0.176401
666	TG(52:4) [NL-18:2]	-0.843921	-0.981141	-0.706701	6.48851e-31	1.57486e-30
667	TG(52:4) [NL-18:3]	-0.311781	-0.460342	-0.163221	4.19504e-05	5.23844e-05
668	TG(52:5) [NL-18:3]	-0.694649	-0.836653	-0.552646	1.00604e-20	1.94572e-20
669	TG(52:5) [NL-20:4]	1.15191	1.02975	1.27408	8.46592e-64	4.05589e-63
670	TG(52:5) [NL-20:5]	1.31513	1.20535	1.42491	4.37785e-93	3.8202e-92
671	TG(53:2) [NL-17:1]	1.3549	1.24381	1.46599	1.19405e-95	1.1221e-94
672	TG(53:2) [NL-18:1]	1.27368	1.15862	1.38875	2.04912e-82	1.43048e-81
673	TG(54:0) [NL-18:0]	1.07423	0.9476	1.20086	1.39093e-53	5.28266e-53
674	TG(54:1) [NL-18:1]	0.770539	0.632515	0.908562	4.12652e-26	8.8702e-26
675	TG(54:2) [NL-18:0]	0.274464	0.126256	0.422673	0.000295784	0.000356595
676	TG(54:2) [NL-20:1]	0.392557	0.245729	0.539386	1.97615e-07	2.62889e-07
677	TG(54:3) [NL-18:1]	-0.973141	-1.10411	-0.84217	7.73786e-43	2.39319e-42
678	TG(54:3) [NL-18:2]	-0.308802	-0.457409	-0.160195	4.98197e-05	6.18947e-05
679	TG(54:4) [NL-18:2]	-1.02986	-1.15921	-0.900505	3.60171e-48	1.23367e-47
680	TG(54:4) [NL-20:3]	0.950757	0.818809	1.0827	1.20089e-40	3.53515e-40
681	TG(54:5) [NL-18:3]	-0.961377	-1.09338	-0.82937	2.14051e-41	6.40407e-41
682	TG(54:5) [NL-20:4]	0.706122	0.567272	0.844971	3.5132e-22	7.11375e-22
683	TG(54:6) [NL-18:3]	-1.11545	-1.24121	-0.989682	1.07264e-57	4.41711e-57
684	TG(54:6) [NL-20:4]	0.310615	0.163207	0.458023	3.90753e-05	4.88775e-05
685	TG(54:6) [NL-20:5]	1.10003	0.97859	1.22147	9.76281e-60	4.2344e-59
686	TG(54:6) [NL-22:6]	1.08025	0.959457	1.20103	1.71004e-58	7.24543e-58
687	TG(54:7) [NL-20:5]	0.574125	0.432974	0.715275	4.98579e-15	8.51884e-15
688	TG(54:7) [NL-22:6]	0.827863	0.695626	0.960099	6.93939e-32	1.74796e-31
689	TG(56:6) [NL-20:4]	-0.130493	-0.280297	0.0193107	0.0876711	0.0967815
690	TG(56:6) [NL-22:5](a)	1.17086	1.05197	1.28975	1.84915e-68	1.00402e-67
691	TG(56:6) [NL-22:5](b)	1.16927	1.05038	1.28816	2.61599e-68	1.39965e-67
692	TG(56:7) [NL-20:4]	-0.502646	-0.64784	-0.357451	2.12662e-11	3.26111e-11
693	TG(56:7) [NL-20:5]	0.627885	0.487114	0.768656	1.22366e-17	2.20379e-17
694	TG(56:7) [NL-22:5](a)	0.82168	0.688291	0.955069	5.3133e-31	1.29822e-30
695	TG(56:7) [NL-22:5](b)	0.820786	0.687374	0.954199	6.21716e-31	1.51401e-30
696	TG(56:7) [NL-22:6]	0.847449	0.717637	0.97726	2.73836e-34	7.19433e-34
697	TG(56:8) [NL-20:4]	-0.351105	-0.498965	-0.203244	3.68956e-06	4.72805e-06
698	TG(56:8) [NL-20:5]	0.12711	-0.0213033	0.275524	0.0931179	0.102332
699	TG(56:8) [NL-22:6]	0.457785	0.316723	0.598848	3.20142e-10	4.74069e-10
700	TG(56:9) [NL-22:6]	0.36592	0.221524	0.510316	8.03399e-07	1.04599e-06
701	TG(58:10) [NL-22:6]	0.0764895	-0.0720673	0.225046	0.312468	0.329552
702	TG(58:8) [NL-22:6]	0.465541	0.322253	0.60883	3.06004e-10	4.54051e-10
703	TG(58:9) [NL-22:6]	0.0558775	-0.0921523	0.203907	0.45893	0.475136
704	TG(O-50:1) [NL-15:0]	1.39353	1.28496	1.5021	3.08515e-103	3.83291e-102
705	TG(O-50:1) [NL-16:0]	1.35737	1.24698	1.46777	8.04631e-97	7.9702e-96
706	TG(O-50:1) [NL-17:1]	1.26269	1.14634	1.37905	6.72205e-80	4.36041e-79
707	TG(O-50:1) [NL-18:1]	1.53024	1.43336	1.62711	1.1318e-138	4.88005e-137
708	TG(O-50:2) [NL-16:1]	1.15523	1.03336	1.27709	2.3524e-64	1.14193e-63
709	TG(O-50:2) [NL-18:1]	1.53584	1.43919	1.63248	8.35838e-140	3.82918e-138
710	TG(O-50:2) [NL-18:2]	0.996006	0.863938	1.12807	6.12844e-44	1.95311e-43
711	TG(O-50:3) [NL-18:2]	1.12213	0.995389	1.24887	1.57432e-57	6.41098e-57
712	TG(O-52:0) [NL-16:0]	1.33345	1.22309	1.4438	2.66351e-94	2.38092e-93
713	TG(O-52:1) [NL-16:0]	1.50892	1.41184	1.606	1.19884e-135	3.66145e-134
714	TG(O-52:1) [NL-18:1]	1.60611	1.51824	1.69397	5.96537e-168	1.45754e-165
715	TG(O-52:2) [NL-16:0]	1.4177	1.31361	1.5218	1.32614e-112	1.906e-111
716	TG(O-52:2) [NL-17:1]	1.48814	1.38911	1.58718	1.77026e-129	4.47448e-128
717	TG(O-52:2) [NL-18:1]	1.55092	1.45724	1.6446	1.05871e-147	5.96948e-146
718	TG(O-54:2) [NL-17:1]	1.57504	1.48503	1.66505	7.93302e-159	9.69151e-157
719	TG(O-54:2) [NL-18:1]	1.61318	1.52673	1.69964	2.26862e-172	1.6629e-169
720	TG(O-54:3) [NL-17:1]	1.46775	1.36596	1.56955	3.41994e-122	6.59688e-121
721	TG(O-54:3) [NL-18:1]	1.55035	1.45734	1.64336	4.87231e-149	3.24673e-147
722	TG(O-54:4) [NL-17:1]	0.929891	0.798526	1.06126	1.99268e-39	5.6834e-39
723	TG(O-54:4) [NL-18:2]	1.17791	1.05746	1.29836	1.09504e-67	5.69265e-67
724	Ubiquinone	0.0739681	-0.0772646	0.225201	0.337302	0.354724
725	CE(18:2) [+OH]	-0.401784	-0.549913	-0.253655	1.32193e-07	1.77468e-07
726	CE(20:4) [+OH]	0.774059	0.636944	0.911174	1.26234e-26	2.77034e-26
727	CE(22:6) [+OH]	0.447574	0.303685	0.591462	1.60244e-09	2.30764e-09
728	LPC(18:2) [+OH]	-0.350173	-0.498392	-0.201954	4.12458e-06	5.26711e-06
729	LPC(20:4) [+OH]	0.016743	-0.133467	0.166953	0.826861	0.839459
730	LPC(22:6) [+OH]	-0.00951483	-0.159797	0.140768	0.901124	0.907313
731	PC(34:2) [+OH]	-0.629641	-0.771501	-0.487782	1.72954e-17	3.09208e-17
732	PC(36:4) [+OH]	1.08329	0.958215	1.20836	1.79962e-55	7.13039e-55
733	PC(38:6) [+OH]	1.41582	1.31134	1.5203	8.66191e-112	1.17577e-110
1p-values corrected for multiple comparisons by the method of Benjamini and Hochberg (BH).

## Sheet: S9
S9: Association of breastfeeding with lipid classes at 6 months
Lipid #	Lipid Class	beta	95% Lower CI	95% Upper CI	p-value	pvalue (BH)1
1	Sph	-0.268345	-0.416967	-0.119722	0.00041692	0.00089967
2	S1P	-0.129163	-0.278933	0.0206068	0.0908712	0.120184
3	dhCer	0.772502	0.634873	0.910131	2.33143e-26	1.59314e-25
4	Cer	-0.242957	-0.390249	-0.0956646	0.00125443	0.00214299
5	C1P	0.115782	-0.0339617	0.265526	0.129472	0.165885
6	MHC	0.723513	0.585124	0.861903	2.79421e-23	1.63661e-22
7	DHC	0.0769962	-0.0722889	0.226281	0.31164	0.365064
8	THC	0.515069	0.369743	0.660396	7.29411e-12	2.30045e-11
9	GM3	1.06664	0.94129	1.19199	7.37322e-54	7.55755e-53
10	GM1	0.409228	0.262678	0.555778	5.6803e-08	1.36996e-07
11	Sulfatide	0.251906	0.102561	0.401251	0.000971775	0.0017323
12	SM	0.456338	0.312074	0.600601	8.59765e-10	2.51788e-09
13	PA	-0.254586	-0.402985	-0.106187	0.000795041	0.00148167
14	PC	0.52594	0.380883	0.670997	2.47669e-12	8.46203e-12
15	PC(O)	0.699889	0.558706	0.841072	3.2702e-21	1.67598e-20
16	PC(P)	0.927172	0.794485	1.05986	1.46857e-38	1.20423e-37
17	LPC	0.0222106	-0.12682	0.171241	0.769943	0.809427
18	LPC(O)	0.156584	0.00830362	0.304864	0.0385056	0.0563832
19	LPC(P)	0.531355	0.387723	0.674987	9.16686e-13	3.41674e-12
20	PE	-0.429929	-0.575595	-0.284263	9.94788e-09	2.54914e-08
21	PE(O)	1.33829	1.22636	1.45022	8.29499e-93	1.70047e-91
22	PE(P)	1.27534	1.16232	1.38835	6.3398e-85	8.6644e-84
23	LPE	-0.17207	-0.321202	-0.0229371	0.02379	0.037515
24	LPE(P)	0.594055	0.452766	0.735343	6.44328e-16	2.64175e-15
25	PI	-0.145578	-0.295322	0.00416701	0.0567086	0.0801742
26	PIP1	-0.255906	-0.404941	-0.10687	0.00078655	0.00148167
27	LPI	-0.00687603	-0.156348	0.142596	0.928071	0.928071
28	PS	-0.255476	-0.403981	-0.106972	0.000768794	0.00148167
29	PG	0.0610476	-0.0883372	0.210432	0.422685	0.46838
30	CE	0.0202617	-0.129995	0.170518	0.791309	0.811091
31	COH	0.686055	0.545518	0.826592	1.19474e-20	5.44272e-20
32	DE	0.214374	0.0657876	0.36296	0.00474218	0.00777718
33	FFA	0.132509	-0.0154529	0.280471	0.0791411	0.108159
34	Acylcarnitine	0.430455	0.285039	0.575872	9.02258e-09	2.46617e-08
35	DG	-0.0893261	-0.240442	0.0617894	0.246263	0.296964
36	TG(SIM)	-0.0520309	-0.202308	0.0982467	0.496929	0.53616
37	TG(O)	1.38608	1.27965	1.49251	1.73574e-105	7.11652e-104
38	Ubiquinone	0.0739681	-0.0772646	0.225201	0.337302	0.38415
39	OxSpecies	-0.0924546	-0.242852	0.0579425	0.227904	0.283154
40	TotalLipids	0.343801	0.197018	0.490584	4.97222e-06	1.13256e-05
41	CE_COH	0.160859	0.0113579	0.31036	0.0349911	0.0531346

## Sheet: S10
S10: Association of breastfeeding status and NMR metabolomics biomarkers at 12m
Biomarker #	NMR Biomarker	beta	95% Lower CI	95% Upper CI	p-value	pvalue (BH)1
1	XXL_VLDL_P	-0.153634	-0.307744	0.000476892	0.0507113	0.0824199
2	XXL_VLDL_L	-0.0203717	-0.175237	0.134493	0.796288	0.841036
3	XXL_VLDL_PL	0.217304	0.0633183	0.371291	0.005739	0.0122644
4	XXL_VLDL_C	-0.362949	-0.513722	-0.212177	2.74402e-06	9.90823e-06
5	XXL_VLDL_CE	0.0295604	-0.124679	0.1838	0.70684	0.773304
6	XXL_VLDL_FC	0.115857	-0.0381089	0.269824	0.14003	0.198919
7	XXL_VLDL_TG	0.105289	-0.0483074	0.258885	0.178798	0.245889
8	XL_VLDL_P	0.148054	-0.00456251	0.300671	0.0572344	0.0916001
9	XL_VLDL_L	0.400865	0.250164	0.551565	2.30377e-07	1.01117e-06
10	XL_VLDL_PL	0.510355	0.360656	0.660054	4.33356e-11	2.7864e-10
11	XL_VLDL_C	0.251239	0.0979634	0.404514	0.00134771	0.00327109
12	XL_VLDL_CE	0.403568	0.251627	0.55551	2.39824e-07	1.04638e-06
13	XL_VLDL_FC	0.715641	0.571406	0.859876	3.58526e-21	6.91577e-20
14	XL_VLDL_TG	-0.747143	-0.889316	-0.60497	2.11198e-23	5.33821e-22
15	L_VLDL_P	-0.45331	-0.601738	-0.304882	3.17138e-09	1.73479e-08
16	L_VLDL_L	-0.559849	-0.705981	-0.413717	1.58186e-13	1.31762e-12
17	L_VLDL_PL	-0.666923	-0.810598	-0.523247	7.46398e-19	1.03228e-17
18	L_VLDL_C	-0.741708	-0.883637	-0.599779	3.55799e-23	8.41291e-22
19	L_VLDL_CE	-0.578817	-0.725389	-0.432244	2.99219e-14	2.74159e-13
20	L_VLDL_FC	-0.364575	-0.514243	-0.214907	2.0951e-06	7.79546e-06
21	L_VLDL_TG	-0.345295	-0.496443	-0.194147	8.45962e-06	2.83146e-05
22	M_VLDL_P	-0.153325	-0.30519	-0.00145943	0.0478442	0.0782808
23	M_VLDL_L	-0.198298	-0.349367	-0.0472285	0.0101614	0.0204623
24	M_VLDL_PL	-0.420711	-0.569816	-0.271606	4.22833e-08	2.01049e-07
25	M_VLDL_C	-0.536593	-0.684146	-0.38904	2.25117e-12	1.63377e-11
26	M_VLDL_CE	-0.369284	-0.519863	-0.218705	1.79046e-06	6.76498e-06
27	M_VLDL_FC	-0.18408	-0.335653	-0.0325065	0.0173677	0.0332389
28	M_VLDL_TG	0.0513186	-0.103015	0.205652	0.514093	0.597195
29	S_VLDL_P	0.0514436	-0.101872	0.204759	0.510274	0.5937
30	S_VLDL_L	0.0878515	-0.0654023	0.241105	0.260794	0.339541
31	S_VLDL_PL	0.159555	0.00877794	0.310332	0.0381029	0.0640584
32	S_VLDL_C	0.0660174	-0.0875315	0.219566	0.39891	0.48491
33	S_VLDL_CE	0.0974512	-0.0549222	0.249825	0.209671	0.283451
34	S_VLDL_FC	-0.169976	-0.322723	-0.017229	0.0292308	0.051754
35	S_VLDL_TG	-0.0743101	-0.227084	0.0784636	0.339938	0.428871
36	XS_VLDL_P	-0.430289	-0.579735	-0.280843	2.26153e-08	1.12007e-07
37	XS_VLDL_L	0.0305042	-0.123585	0.184593	0.697653	0.764395
38	XS_VLDL_PL	0.373887	0.224119	0.523655	1.17333e-06	4.5992e-06
39	XS_VLDL_C	-0.0901556	-0.243004	0.0626932	0.247256	0.326557
40	XS_VLDL_CE	0.0179925	-0.135024	0.171009	0.817502	0.858494
41	XS_VLDL_FC	0.0145895	-0.13819	0.167369	0.851341	0.8839
42	XS_VLDL_TG	0.0201412	-0.134339	0.174621	0.798052	0.841686
43	IDL_P	0.153498	0.00221558	0.30478	0.0467463	0.0768274
44	IDL_L	0.0877725	-0.0636043	0.239149	0.25536	0.333768
45	IDL_PL	-0.182167	-0.334913	-0.0294208	0.0194812	0.0367087
46	IDL_C	-0.0789414	-0.231507	0.0736239	0.310055	0.395253
47	IDL_CE	-0.368804	-0.518172	-0.219435	1.52694e-06	5.82942e-06
48	IDL_FC	-0.0619399	-0.215286	0.0914067	0.428049	0.51268
49	IDL_TG	0.223152	0.0721886	0.374116	0.00381904	0.00848289
50	L_LDL_P	-0.206331	-0.358863	-0.0537983	0.00808769	0.0166525
51	L_LDL_L	-0.0695501	-0.222335	0.0832348	0.371788	0.459563
52	L_LDL_PL	-0.0272103	-0.17875	0.124329	0.724558	0.786816
53	L_LDL_C	-0.0396382	-0.192073	0.112797	0.609858	0.683525
54	L_LDL_CE	-0.124549	-0.276786	0.0276876	0.108672	0.159632
55	L_LDL_FC	-0.295447	-0.446454	-0.144441	0.000133069	0.000381013
56	L_LDL_TG	-0.0885475	-0.241412	0.0643172	0.255831	0.333768
57	M_LDL_P	0.138883	-0.0130047	0.290772	0.0730474	0.112578
58	M_LDL_L	-0.177248	-0.329981	-0.0245142	0.022995	0.0424567
59	M_LDL_PL	0.25912	0.107442	0.410798	0.000837803	0.00209594
60	M_LDL_C	-0.153829	-0.306725	-0.000932176	0.0486231	0.079378
61	M_LDL_CE	0.307192	0.155069	0.459315	8.07472e-05	0.00023866
62	M_LDL_FC	0.581264	0.436068	0.72646	1.37058e-14	1.28799e-13
63	M_LDL_TG	0.207429	0.0550791	0.35978	0.00768532	0.0160038
64	S_LDL_P	0.481847	0.333213	0.630481	3.4457e-10	2.05341e-09
65	S_LDL_L	0.147877	-0.00544707	0.301201	0.0586905	0.0933191
66	S_LDL_PL	-0.240242	-0.39329	-0.0871945	0.00213516	0.00496849
67	S_LDL_C	0.0330404	-0.120907	0.186988	0.673628	0.743629
68	S_LDL_CE	0.362372	0.211776	0.512968	2.77031e-06	9.95412e-06
69	S_LDL_FC	0.689716	0.544735	0.834697	1.12147e-19	1.74902e-18
70	S_LDL_TG	0.620243	0.474309	0.766177	3.53368e-16	4.09185e-15
71	XL_HDL_P	0.39372	0.242769	0.544671	3.89316e-07	1.64005e-06
72	XL_HDL_L	0.0351709	-0.118616	0.188957	0.653578	0.726969
73	XL_HDL_PL	0.359029	0.20772	0.510338	3.78273e-06	1.33305e-05
74	XL_HDL_C	0.525907	0.37864	0.673174	5.36442e-12	3.67488e-11
75	XL_HDL_CE	0.0415795	-0.112198	0.195357	0.595701	0.670736
76	XL_HDL_FC	-0.0784098	-0.231746	0.0749262	0.315759	0.400893
77	XL_HDL_TG	-0.0410818	-0.194544	0.11238	0.599362	0.673823
78	L_HDL_P	-0.213094	-0.365433	-0.0607547	0.00617733	0.0131627
79	L_HDL_L	-0.11116	-0.264519	0.0421992	0.155163	0.218719
80	L_HDL_PL	0.16401	0.0108202	0.3172	0.035905	0.0613482
81	L_HDL_C	0.70737	0.56237	0.852369	1.47637e-20	2.57662e-19
82	L_HDL_CE	0.675089	0.529924	0.820254	6.48663e-19	9.32293e-18
83	L_HDL_FC	0.409736	0.258675	0.560797	1.34226e-07	6.03605e-07
84	L_HDL_TG	0.477547	0.328683	0.626411	5.187e-10	3.06619e-09
85	M_HDL_P	0.45602	0.308085	0.603954	2.28067e-09	1.26646e-08
86	M_HDL_L	0.657362	0.510803	0.803921	9.21556e-18	1.20625e-16
87	M_HDL_PL	0.495827	0.345651	0.646003	1.6592e-10	1.03067e-09
88	M_HDL_C	0.50407	0.353715	0.654425	8.83074e-11	5.58011e-10
89	M_HDL_CE	0.553356	0.404586	0.702126	7.3577e-13	5.67704e-12
90	M_HDL_FC	-0.546345	-0.692992	-0.399698	6.77806e-13	5.28544e-12
91	M_HDL_TG	-0.306891	-0.457754	-0.156028	7.16039e-05	0.000215105
92	S_HDL_P	-0.0641846	-0.217755	0.0893855	0.412188	0.49775
93	S_HDL_L	0.135011	-0.0189199	0.288942	0.0855092	0.128968
94	S_HDL_PL	0.418693	0.267073	0.570313	8.02621e-08	3.74727e-07
95	S_HDL_C	0.137766	-0.0165079	0.292039	0.0799974	0.122418
96	S_HDL_CE	0.0346919	-0.119395	0.188778	0.658617	0.729254
97	S_HDL_FC	0.132493	-0.0210676	0.286054	0.0907161	0.135427
98	S_HDL_TG	0.0614916	-0.0911528	0.214136	0.429283	0.513319
99	XXL_VLDL_PL_pct	0.246962	0.0940632	0.39986	0.00158238	0.00379048
100	XXL_VLDL_C_pct	0.271354	0.11849	0.424218	0.000521381	0.0013649
101	XXL_VLDL_CE_pct	0.718929	0.57443	0.863428	2.8359e-21	5.61815e-20
102	XXL_VLDL_FC_pct	0.492432	0.342505	0.642359	2.04885e-10	1.25151e-09
103	XXL_VLDL_TG_pct	0.0956093	-0.0582054	0.249424	0.222744	0.29861
104	XL_VLDL_PL_pct	0.0720419	-0.0825438	0.226628	0.360539	0.450213
105	XL_VLDL_C_pct	0.510378	0.361449	0.659306	3.45811e-11	2.24318e-10
106	XL_VLDL_CE_pct	0.15789	0.00502427	0.310755	0.0429489	0.0713198
107	XL_VLDL_FC_pct	0.469876	0.320097	0.619655	1.20475e-09	6.79293e-09
108	XL_VLDL_TG_pct	0.333199	0.182006	0.484391	1.72405e-05	5.44018e-05
109	L_VLDL_PL_pct	0.249704	0.0967948	0.402613	0.00140436	0.00339734
110	L_VLDL_C_pct	0.339074	0.18669	0.491458	1.43143e-05	4.58182e-05
111	L_VLDL_CE_pct	0.596352	0.449599	0.743105	5.69811e-15	5.72153e-14
112	L_VLDL_FC_pct	0.0894317	-0.0642638	0.243127	0.253687	0.332653
113	L_VLDL_TG_pct	0.158705	0.00500801	0.312402	0.0430059	0.0713198
114	M_VLDL_PL_pct	0.111953	-0.0411868	0.265092	0.151657	0.21419
115	M_VLDL_C_pct	0.148131	-0.00517453	0.301436	0.0582286	0.092786
116	M_VLDL_CE_pct	0.27539	0.122646	0.428134	0.000426	0.00113548
117	M_VLDL_FC_pct	0.545544	0.397272	0.693815	1.26858e-12	9.58625e-12
118	M_VLDL_TG_pct	0.305005	0.152726	0.457284	9.21332e-05	0.000270135
119	S_VLDL_PL_pct	-0.171944	-0.325497	-0.0183911	0.0282365	0.0501147
120	S_VLDL_C_pct	0.252834	0.100057	0.405612	0.001211	0.00295888
121	S_VLDL_CE_pct	-0.163247	-0.315854	-0.0106406	0.0360618	0.0613843
122	S_VLDL_FC_pct	0.164689	0.0130124	0.316365	0.033369	0.057709
123	S_VLDL_TG_pct	-0.335757	-0.488134	-0.183379	1.72928e-05	5.44018e-05
124	XS_VLDL_PL_pct	0.218207	0.0675119	0.368902	0.00459697	0.0100285
125	XS_VLDL_C_pct	-0.0230269	-0.177442	0.131388	0.769789	0.821214
126	XS_VLDL_CE_pct	0.143402	-0.00873165	0.295535	0.0646399	0.101676
127	XS_VLDL_FC_pct	0.117765	-0.0362786	0.271809	0.133825	0.191589
128	XS_VLDL_TG_pct	-0.266769	-0.418205	-0.115332	0.000574761	0.00148345
129	IDL_PL_pct	-0.0527784	-0.20572	0.100163	0.498318	0.581635
130	IDL_C_pct	-0.0427725	-0.195205	0.10966	0.58189	0.658368
131	IDL_CE_pct	-0.174304	-0.326949	-0.0216584	0.025275	0.0458572
132	IDL_FC_pct	0.13397	-0.0191795	0.28712	0.0863388	0.129685
133	IDL_TG_pct	0.385715	0.234897	0.536532	6.45785e-07	2.60088e-06
134	L_LDL_PL_pct	0.220314	0.0672556	0.373372	0.00484334	0.0105035
135	L_LDL_C_pct	0.102911	-0.0499178	0.25574	0.186591	0.254695
136	L_LDL_CE_pct	-0.629025	-0.774329	-0.48372	1.05849e-16	1.27192e-15
137	L_LDL_FC_pct	-0.205005	-0.358102	-0.051908	0.00874684	0.0178592
138	L_LDL_TG_pct	-0.0249641	-0.177674	0.127746	0.748353	0.804315
139	M_LDL_PL_pct	-0.17016	-0.322042	-0.018277	0.0281571	0.0500951
140	M_LDL_C_pct	-0.0710695	-0.223514	0.0813754	0.360368	0.450213
141	M_LDL_CE_pct	0.0399741	-0.113397	0.193345	0.609029	0.683525
142	M_LDL_FC_pct	0.371773	0.220137	0.52341	1.80226e-06	6.77464e-06
143	M_LDL_TG_pct	0.45597	0.305179	0.606761	4.48514e-09	2.38232e-08
144	S_LDL_PL_pct	-0.268255	-0.420076	-0.116434	0.000553174	0.00143278
145	S_LDL_C_pct	0.232553	0.079506	0.3856	0.00294822	0.00669195
146	S_LDL_CE_pct	0.157397	0.0049852	0.30981	0.0429808	0.0713198
147	S_LDL_FC_pct	0.330863	0.179412	0.482315	2.03538e-05	6.37578e-05
148	S_LDL_TG_pct	-0.282249	-0.434426	-0.130072	0.000290345	0.000788234
149	XL_HDL_PL_pct	-0.134773	-0.288745	0.0191994	0.0861455	0.12966
150	XL_HDL_C_pct	-0.426336	-0.57667	-0.276002	3.62215e-08	1.74674e-07
151	XL_HDL_CE_pct	0.0844134	-0.0700605	0.238887	0.283713	0.366129
152	XL_HDL_FC_pct	0.517913	0.369949	0.665877	1.3519e-11	9.00858e-11
153	XL_HDL_TG_pct	0.35598	0.204821	0.50714	4.45937e-06	1.55842e-05
154	L_HDL_PL_pct	0.340672	0.189085	0.492259	1.17701e-05	3.80066e-05
155	L_HDL_C_pct	0.150781	-0.00132161	0.302883	0.0520188	0.0841718
156	L_HDL_CE_pct	0.490799	0.341714	0.639884	1.86643e-10	1.14966e-09
157	L_HDL_FC_pct	0.269031	0.117039	0.421023	0.000540915	0.00140599
158	L_HDL_TG_pct	0.343054	0.191243	0.494864	1.0548e-05	3.4363e-05
159	M_HDL_PL_pct	0.069809	-0.0841181	0.223736	0.373571	0.460989
160	M_HDL_C_pct	-0.403561	-0.553486	-0.253635	1.66267e-07	7.43132e-07
161	M_HDL_CE_pct	0.143312	-0.0109666	0.29759	0.0686117	0.106891
162	M_HDL_FC_pct	0.235776	0.0844373	0.387115	0.00230487	0.00532956
163	M_HDL_TG_pct	0.0444704	-0.110199	0.19914	0.572617	0.651752
164	S_HDL_PL_pct	-0.0261192	-0.18021	0.127972	0.739402	0.798206
165	S_HDL_C_pct	0.0109701	-0.143761	0.165701	0.889341	0.913007
166	S_HDL_CE_pct	-0.0492906	-0.203401	0.10482	0.530261	0.613062
167	S_HDL_FC_pct	0.0150842	-0.139408	0.169577	0.848046	0.881727
168	S_HDL_TG_pct	0.202542	0.0485618	0.356522	0.0100053	0.0202036
169	VLDL_size	0.263881	0.111663	0.416099	0.000701678	0.00178587
170	LDL_size	0.0253455	-0.127738	0.178429	0.745244	0.802149
171	HDL_size	0.234057	0.0825439	0.385569	0.00250856	0.00576419
172	Total_C	-0.0282256	-0.181084	0.124633	0.717077	0.782169
173	VLDL_C	-0.0317134	-0.185678	0.122251	0.686055	0.753026
174	Remnant_C	0.0589391	-0.0941263	0.212004	0.449926	0.53365
175	LDL_C	0.295729	0.144378	0.447079	0.000135795	0.000387308
176	HDL_C	-0.289423	-0.440022	-0.138825	0.000174323	0.000485851
177	HDL2_C	0.0279822	-0.12482	0.180785	0.719315	0.783207
178	HDL3_C	0.258157	0.107174	0.409141	0.000829136	0.00208136
179	Esterified_C	0.256461	0.10354	0.409382	0.00104064	0.00255969
180	Free_C	0.529515	0.381483	0.677547	4.96189e-12	3.4312e-11
181	Total_TG	0.144135	-0.00859981	0.29687	0.0643322	0.10141
182	VLDL_TG	0.0940632	-0.0609254	0.249052	0.233854	0.311098
183	LDL_TG	-0.24969	-0.40137	-0.0980108	0.00128509	0.00312946
184	HDL_TG	-0.357404	-0.507714	-0.207094	3.61274e-06	1.2855e-05
185	Phosphoglyc	-0.0697215	-0.22256	0.0831174	0.37078	0.459563
186	TG_by_PG	-0.161296	-0.312621	-0.00997166	0.0367305	0.0620778
187	Phosphatidylc	0.289493	0.137231	0.441756	0.000204137	0.000564651
188	Sphingomyelins	-0.0697043	-0.221624	0.0822151	0.368011	0.457983
189	Cholines	0.579568	0.435765	0.723371	9.26818e-15	9.0581e-14
190	ApoA1	-0.00579992	-0.159923	0.148324	0.941128	0.959453
191	ApoB	-0.0184541	-0.171326	0.134418	0.812732	0.855938
192	ApoB_by_ApoA1	0.180327	0.0283947	0.332259	0.0200706	0.0376259
193	Total_FA	0.0438491	-0.109439	0.197138	0.574571	0.652962
194	Unsaturation	0.0988082	-0.0557018	0.253318	0.209715	0.283451
195	DHA	0.224478	0.0722679	0.376687	0.00390008	0.00863673
196	LA	0.466607	0.319683	0.613531	7.61549e-10	4.43028e-09
197	Omega_3	-0.0025099	-0.156491	0.151471	0.974481	0.982731
198	Omega_6	0.0850716	-0.0675851	0.237728	0.274298	0.355192
199	PUFA	0.268877	0.116131	0.421622	0.000580125	0.00149204
200	MUFA	0.0444172	-0.108615	0.197449	0.568979	0.648618
201	SFA	0.448641	0.299298	0.597983	5.61597e-09	2.94036e-08
202	DHA_pct	0.156091	0.00313841	0.309043	0.0454925	0.0752731
203	LA_pct	0.23857	0.0887699	0.38837	0.00183819	0.00433245
204	Omega_3_pct	0.0694716	-0.0830782	0.222021	0.371592	0.459563
205	Omega_6_pct	0.580159	0.437256	0.723061	6.02629e-15	5.96928e-14
206	PUFA_pct	0.0111683	-0.143328	0.165665	0.887185	0.912071
207	MUFA_pct	0.166946	0.0125351	0.321356	0.0341235	0.0585774
208	SFA_pct	-0.141366	-0.293441	0.0107094	0.0684152	0.106891
209	Glucose	0.140141	-0.0121873	0.292468	0.0713076	0.110504
210	Lactate	0.242004	0.0907023	0.393306	0.00175647	0.00418016
211	Pyruvate	0.0828336	-0.0709486	0.236616	0.29065	0.373111
212	Citrate	-0.00529841	-0.158941	0.148344	0.946042	0.960455
213	Glycerol	0.246873	0.0942808	0.399465	0.00155454	0.00373599
214	Ala	0.117196	-0.0354188	0.269811	0.132093	0.189698
215	Gln	-0.173093	-0.325453	-0.0207321	0.0260262	0.0468728
216	Gly	-0.0153858	-0.168782	0.13801	0.843952	0.879624
217	His	0.127572	-0.0244019	0.279545	0.0997859	0.147169
218	Ile	0.0227083	-0.131033	0.176449	0.771919	0.821214
219	Leu	0.0467782	-0.106365	0.199921	0.548914	0.629558
220	Val	0.176733	0.0234225	0.330043	0.0239184	0.0438304
221	Phe	-0.0345349	-0.186728	0.117658	0.656106	0.727573
222	Tyr	-0.120376	-0.273071	0.0323197	0.122134	0.176925
223	bOHbutyrate	-0.0898092	-0.242384	0.0627659	0.248229	0.327251
224	Acetate	-0.144593	-0.29661	0.00742419	0.0622551	0.0985593
225	Acetoacetate	-0.148587	-0.300408	0.00323462	0.0550716	0.0885251
226	Creatinine	0.307481	0.156076	0.458887	7.35991e-05	0.000219301
227	Albumin	-0.228981	-0.379513	-0.0784484	0.00291749	0.00666205
228	GlycA	0.176032	0.0247219	0.327342	0.0226584	0.042047

[truncated: 37 more sheets: S11, S12, S13, S14, S15, S16, S17, S18, S19, S20, S21, S22, S23, S24, S25, S26, S27, S28, S29, S30 …]
